# Supplementary material
Source: publisher figshare collection journal article supplement (https://gsajournals.figshare.com/ndownloader/files/37850991)
Supplement: Supplementary file 1 [file 37850991]

## Sheet: DP527 genetic map
Number	Chromosome	Marker	Position	Segregation distortion	DP-001	DP-002	DP-003	DP-004	DP-005	DP-006	DP-007	DP-008	DP-009	DP-010	DP-011	DP-012	DP-013	DP-014	DP-015	DP-016	DP-017	DP-018	DP-019	DP-020	DP-021	DP-022	DP-023	DP-024	DP-025	DP-026	DP-027	DP-028	DP-029	DP-030	DP-031	DP-032	DP-033	DP-034	DP-035	DP-036	DP-037	DP-038	DP-039	DP-040	DP-041	DP-042	DP-043	DP-044	DP-045
1	1A	IWB76210	0		1	1	2	1	1	1	2	1	2	2	1	1	1	1	1	1	1	2	1	2	2	1	1	1	2	2	1	2	1	1	2	3	1	1	2	2	1	1	1	1	1	2	2	2	2
2	1A	IWB13141	0		1	1	2	1	1	1	2	1	2	2	1	1	1	1	1	1	1	2	1	2	2	1	1	1	2	2	1	2	1	1	2	1	1	1	2	2	1	1	1	1	1	2	2	2	2
3	1A	IWB9867	0.230411		1	1	2	1	1	1	2	1	2	2	1	1	1	1	1	1	1	2	1	2	2	1	1	1	2	2	1	2	1	1	2	1	1	1	2	2	1	1	1	1	1	2	2	2	2
4	1A	IWB8466	0.230411		1	1	2	1	1	1	2	1	2	2	1	1	1	1	1	1	1	2	1	2	2	1	1	1	2	2	1	2	1	1	2	1	1	1	2	2	1	1	1	1	1	2	2	2	2
5	1A	IWB8881	0.230411		1	1	2	1	1	1	2	1	2	2	1	1	1	1	1	1	1	2	1	2	2	1	1	1	2	2	1	2	1	1	2	1	1	1	2	2	1	1	1	1	1	2	2	2	2
6	1A	IWB9222	0.691244		1	1	2	1	1	1	2	1	2	2	1	1	1	1	1	2	1	2	1	2	2	1	1	1	2	2	1	2	1	1	2	1	1	1	2	2	1	1	1	1	1	2	2	2	2
7	1A	IWB9223	0.691244		1	1	2	1	1	1	2	1	2	2	1	1	1	1	1	2	1	2	1	2	2	1	1	1	2	2	1	2	1	1	2	1	1	1	2	2	1	1	1	1	1	2	2	2	2
8	1A	IWB21832	0.691244		1	1	2	1	1	1	2	1	2	2	1	1	1	1	1	2	1	2	1	2	2	1	1	1	2	2	1	2	1	1	2	1	1	1	2	2	1	1	1	1	1	2	2	2	2
9	1A	IWB6234	0.691244		1	1	2	1	1	1	2	1	2	2	1	1	1	1	1	2	1	2	1	2	2	1	1	1	2	2	1	2	1	1	2	1	1	1	2	2	1	1	1	1	1	2	2	2	2
10	1A	IWB6058	0.691244		1	1	2	1	1	1	2	1	2	2	1	1	1	1	1	2	1	2	1	2	2	1	1	1	2	2	1	2	1	1	2	1	1	1	2	2	1	1	1	1	1	2	2	2	2
11	1A	IWB6476	0.924886		1	1	2	1	1	1	2	1	2	2	1	1	1	1	1	1	1	2	1	2	2	1	1	1	2	2	1	2	1	1	2	3	1	1	2	2	1	1	1	1	1	2	2	2	2
12	1A	IWB78041	4.93335		1	1	2	1	1	1	2	1	2	2	1	1	1	1	1	1	1	2	1	2	2	2	1	1	2	2	1	2	1	1	1	1	1	1	2	2	1	2	1	1	1	2	2	2	2
13	1A	IWB8776	4.93335		1	1	2	1	1	1	2	1	2	2	1	1	1	1	1	1	1	2	1	2	2	2	1	1	2	2	1	2	1	1	1	1	1	1	2	2	1	2	1	1	1	2	2	2	2
14	1A	IWB65373	4.93335		1	1	2	1	1	1	2	1	2	2	1	1	1	1	1	1	1	2	1	2	2	2	1	1	2	2	1	2	1	1	1	1	1	1	2	2	1	2	1	1	1	2	2	2	2
15	1A	IWB5769	4.93335		1	1	2	1	1	1	2	1	2	2	1	1	1	1	1	1	1	2	1	2	2	2	1	1	2	2	1	2	1	1	1	1	1	1	2	2	1	2	1	1	1	2	2	2	2
16	1A	IWB60351	5.16166		1	1	2	1	1	1	2	1	2	2	1	1	1	1	1	1	1	2	1	2	2	2	1	1	2	2	1	2	1	1	1	1	1	1	2	2	1	2	1	1	1	2	2	2	2
17	1A	IWB71424	5.16166		1	1	2	1	1	1	2	1	2	2	1	1	1	1	1	1	1	2	1	2	2	2	1	1	2	2	1	2	1	1	1	1	1	1	2	2	1	2	1	1	1	2	2	2	2
18	1A	IWB71424	5.16166		1	1	2	1	1	1	2	1	2	2	1	1	1	1	1	1	1	2	1	2	2	2	1	1	2	2	1	2	1	1	1	1	1	1	2	2	1	2	1	1	1	2	2	2	2
19	1A	IWB71425	5.16166		1	1	2	1	1	1	2	1	2	2	1	1	1	1	1	1	1	2	1	2	2	2	1	1	2	2	1	2	1	1	1	1	1	1	2	2	1	2	1	1	1	2	2	2	2
20	1A	IWB32244	5.16166		1	1	2	1	1	1	2	1	2	2	1	1	1	1	1	1	1	2	1	2	2	2	1	1	2	2	1	2	1	1	1	1	1	1	2	2	1	2	1	1	1	2	2	2	2
21	1A	IWB8696	7.0673		1	1	2	1	2	1	2	1	2	2	1	1	1	1	1	1	1	2	1	2	2	2	1	1	1	2	1	2	1	1	1	1	1	1	2	2	1	2	1	1	1	2	2	2	2
22	1A	IWB7470	7.29878		1	1	2	1	2	1	2	1	2	2	1	1	1	1	1	1	1	2	1	2	2	2	1	1	1	2	1	2	1	1	1	1	1	1	2	2	1	2	1	1	1	2	2	2	2
23	1A	IWB17894	7.29878		1	1	2	1	2	1	2	1	2	2	1	1	1	1	1	1	1	3	1	2	2	2	1	1	1	2	1	2	1	1	1	1	1	1	2	2	1	2	1	1	1	2	2	2	2
24	1A	IWB27228	10.5697		1	1	2	1	2	1	2	1	2	2	1	1	1	1	1	1	1	2	1	2	2	2	1	1	1	2	1	2	1	1	1	1	1	1	2	2	1	2	1	1	1	2	2	2	2
25	1A	IWB6172	10.5697		1	1	2	1	2	1	2	1	2	2	1	1	1	1	1	1	1	2	1	2	2	2	1	1	1	2	1	2	1	1	1	1	1	1	2	2	1	2	1	1	1	2	2	2	2
26	1A	IWB54411	10.5697		1	1	2	1	2	1	2	1	2	2	1	1	1	1	1	1	1	2	1	2	2	2	1	1	1	2	1	2	1	1	1	1	1	1	2	2	1	2	1	1	1	2	2	2	2
27	1A	IWB29039	10.5697		1	1	2	1	2	1	2	1	2	2	1	1	1	1	1	1	1	2	1	2	2	2	1	1	1	2	1	2	1	1	1	1	1	1	2	2	1	2	1	1	1	2	2	2	2
28	1A	IWB3088	10.5697		1	1	2	1	2	1	2	1	2	2	1	1	1	1	1	1	1	2	1	2	2	2	1	1	1	2	1	2	1	1	1	3	1	1	2	2	1	2	1	1	1	2	2	2	2
29	1A	IWB3087	10.5697		1	1	2	1	2	1	2	1	2	2	1	1	1	1	1	1	1	2	1	2	2	2	1	1	1	2	1	2	1	1	1	1	1	1	2	2	1	2	1	1	1	2	2	2	2
30	1A	IWB33789	10.5697		1	1	2	1	2	1	2	1	2	2	1	1	1	1	1	1	1	2	1	2	2	2	1	1	1	2	1	2	1	1	1	1	1	1	2	2	1	2	1	1	1	2	2	2	2
31	1A	IWB42976	11.2739		1	1	2	1	2	1	2	1	2	2	1	1	1	1	1	1	1	2	1	2	2	2	1	1	1	2	1	2	1	1	1	1	1	1	2	2	1	2	1	1	1	2	2	2	2
32	1A	IWB37531	11.2739		1	1	2	1	2	1	2	1	2	2	1	1	1	1	1	1	1	2	1	2	2	2	1	1	1	2	1	2	1	1	1	1	1	1	2	2	1	2	1	1	1	2	2	2	2
33	1A	IWB10392	11.2739		1	1	2	1	2	1	2	1	2	2	1	1	1	1	1	1	3	2	3	2	2	2	1	1	1	2	1	2	1	1	1	1	1	1	2	2	3	2	1	1	1	2	2	2	2
34	1A	IWB7461	11.2739		1	1	2	1	2	1	2	1	2	2	1	1	1	1	1	1	1	2	1	2	2	2	1	1	1	2	1	2	1	1	1	1	1	1	2	2	3	2	1	1	1	2	2	2	2
35	1A	IWB4762	11.2739		1	1	2	1	3	1	2	1	2	2	1	1	1	1	1	1	1	2	1	2	2	2	1	1	1	2	1	2	1	1	1	1	1	1	2	2	1	2	1	1	1	2	2	2	2
36	1A	IWB11208	11.2739		1	1	2	1	2	1	2	1	2	2	1	1	1	1	1	1	1	2	1	2	2	2	1	1	1	2	1	2	1	1	1	1	1	1	2	2	1	2	1	1	1	2	2	2	2
37	1A	IWB81178	11.2739		1	1	2	1	2	1	2	1	2	2	1	1	1	1	1	1	1	2	1	2	2	2	1	1	1	2	1	2	1	1	1	3	1	1	2	2	1	2	1	1	1	2	2	2	2
38	1A	IWB10746	11.2739		1	1	2	1	2	1	2	1	2	2	1	1	1	1	1	1	1	2	1	2	2	2	1	1	1	2	1	2	1	1	1	1	1	1	2	2	1	2	1	1	1	2	2	2	2
39	1A	IWB78419	11.2739		1	1	2	1	2	1	2	1	2	2	1	1	1	1	1	1	1	2	1	2	2	2	1	1	1	2	1	2	1	1	1	1	1	1	2	2	1	2	1	1	1	2	2	2	3
40	1A	IWB73128	11.2739		1	1	2	1	2	1	2	1	2	2	1	1	1	1	1	1	1	2	1	2	2	2	1	1	1	2	1	2	1	1	1	1	1	1	2	2	1	2	1	1	1	2	2	2	2
41	1A	IWB36707	11.2739		1	1	2	1	2	1	2	1	2	2	1	1	1	1	1	1	1	2	1	2	2	2	1	1	1	2	1	2	1	1	1	1	1	1	2	2	1	2	1	1	1	2	2	2	2
42	1A	IWB43053	11.2739		1	1	2	1	2	1	2	1	2	2	1	1	1	1	1	1	1	2	1	2	2	2	1	3	1	2	1	2	1	1	1	1	1	1	2	2	1	2	1	1	1	2	2	2	2
43	1A	IWB71687	11.2739		1	1	2	1	2	1	2	1	2	2	1	1	1	1	1	1	1	2	1	2	2	2	1	1	1	2	1	2	1	1	1	1	1	1	2	2	1	2	1	1	1	2	2	2	2
44	1A	IWB14618	11.2739		1	1	2	1	2	1	2	1	2	2	1	1	1	1	1	1	1	2	1	2	2	2	1	1	1	2	1	2	1	1	1	1	1	1	2	2	1	2	1	1	1	2	2	2	2
45	1A	IWB12795	11.2739		1	1	2	1	2	1	2	1	2	2	1	1	1	1	1	1	1	2	1	2	2	2	1	1	1	2	1	2	1	1	1	1	1	1	2	2	1	2	1	1	1	2	2	2	2
46	1A	IWB71461	11.2739		1	1	2	1	2	1	2	1	2	2	1	1	1	1	1	1	1	2	1	2	2	2	1	1	1	2	1	2	1	1	1	1	1	1	2	2	1	2	1	1	1	2	2	2	2
47	1A	IWB35459	11.2739		1	1	2	1	2	1	2	1	2	2	1	1	1	1	1	1	1	2	1	2	2	2	1	1	1	2	1	2	1	1	1	1	1	1	2	2	1	2	1	1	1	2	2	2	2
48	1A	IWB7590	11.2739		1	1	2	1	2	1	2	1	2	2	1	1	1	1	1	1	1	2	1	2	2	2	1	1	1	2	1	2	1	1	1	1	1	1	2	2	1	2	1	1	1	2	2	2	2
49	1A	IWB45715	11.2739		1	1	2	1	3	1	2	1	2	2	1	1	1	1	1	1	1	2	1	2	2	2	1	1	1	2	1	2	1	1	1	1	1	1	2	2	1	2	1	1	1	2	2	2	2
50	1A	IWB7333	11.2739		1	1	2	1	2	1	2	1	2	2	1	1	1	1	1	1	1	2	1	2	2	2	1	1	1	2	1	2	1	1	1	1	1	1	2	2	1	2	1	1	1	2	2	2	2
51	1A	IWB73129	11.2739		1	1	2	1	2	1	2	1	2	2	1	1	1	1	1	1	1	2	1	2	2	2	1	1	1	2	1	2	1	1	1	1	1	1	2	2	1	2	1	1	1	2	2	2	2
52	1A	IWB10867	11.2739		1	1	2	1	2	1	2	1	2	2	1	1	1	1	1	1	1	2	1	2	2	2	1	1	1	2	1	2	1	1	1	1	1	1	2	2	1	2	1	1	1	2	2	2	2
53	1A	IWB43660	11.2739		1	1	2	1	2	1	2	1	2	2	1	1	1	1	1	1	1	2	1	2	2	2	1	1	1	2	1	2	1	1	1	1	1	1	2	2	1	2	1	1	1	2	2	2	2
54	1A	IWB61317	11.2739		1	1	2	1	2	1	2	1	2	2	1	1	1	1	1	1	1	2	1	2	2	2	1	1	1	2	1	2	1	1	1	1	1	1	2	2	1	2	1	1	1	2	2	2	2
55	1A	IWB75039	11.2739		1	1	2	1	2	1	2	1	2	2	1	1	1	1	1	1	1	2	1	2	2	2	1	1	1	2	1	2	1	1	1	1	1	1	2	2	1	2	1	1	1	2	2	2	2
56	1A	IWB54709	11.2739		1	1	2	1	2	1	2	1	2	2	1	1	1	1	1	1	1	2	1	2	2	2	1	1	1	2	1	2	1	1	1	1	1	1	2	2	1	2	1	1	1	2	2	2	2
57	1A	IWB57680	11.2739		1	1	2	1	2	1	2	1	2	2	1	1	1	1	1	1	1	2	1	2	2	2	1	1	1	2	1	2	1	1	1	1	1	1	2	2	1	2	1	1	1	2	2	2	2
58	1A	IWB76921	11.2739		1	1	2	1	2	1	2	1	2	2	1	1	1	1	1	1	1	2	1	2	2	2	1	1	1	2	1	2	1	1	1	1	1	1	2	2	1	2	1	1	1	2	2	2	2
59	1A	IWB5842	11.2739		1	1	2	1	2	1	2	1	2	2	1	1	1	1	1	1	1	2	1	2	2	2	1	1	1	2	1	2	1	3	1	1	1	1	2	2	1	2	1	1	1	2	2	2	2
60	1A	IWB71688	11.2739		1	1	2	1	2	1	2	1	2	2	1	1	1	1	1	1	1	2	1	2	2	2	1	1	1	2	1	2	1	1	1	1	1	1	2	2	1	2	1	1	1	3	2	2	2
61	1A	IWB61318	11.2739		1	1	2	1	2	1	2	1	2	2	1	1	1	1	1	1	1	2	1	2	2	2	1	1	1	2	1	2	1	1	1	1	1	1	2	2	1	2	1	1	1	2	2	2	2
62	1A	IWB59783	11.2739		1	1	2	1	2	1	2	1	2	2	1	1	1	1	1	1	1	2	1	2	2	2	1	1	1	2	1	2	1	1	1	3	1	1	2	2	1	2	1	1	1	2	2	2	2
63	1A	IWB71462	11.2739		1	1	2	1	2	1	2	1	2	2	1	1	1	1	1	1	1	2	1	2	2	2	1	1	1	2	1	2	1	1	1	3	1	1	2	2	1	2	1	1	1	2	2	2	2
64	1A	IWB6155	11.2739		1	1	2	1	2	1	2	1	2	2	1	1	1	1	1	1	1	2	1	2	2	2	1	1	1	2	1	2	1	1	1	1	1	1	2	2	1	2	1	1	1	2	2	2	2
65	1A	IWB42196	11.2739		1	1	2	1	2	1	2	1	2	2	1	1	1	1	1	1	1	2	1	2	2	2	1	1	1	2	1	2	1	1	1	1	1	1	2	2	1	2	1	1	1	2	2	2	2
66	1A	IWB29371	11.2739		1	1	2	1	2	1	2	1	2	2	1	1	1	1	1	1	1	2	1	2	2	2	1	1	1	2	1	2	1	1	1	1	1	1	2	2	1	2	1	1	1	2	2	2	2
67	1A	IWB11162	11.2739		1	1	2	1	2	1	2	1	2	2	1	1	1	1	1	1	1	2	1	2	2	2	1	1	1	2	1	2	1	1	1	1	1	1	2	2	1	2	1	1	1	2	2	2	2
68	1A	IWB22291	11.2739		1	1	2	1	2	1	2	1	2	2	1	1	1	1	1	1	1	2	1	2	2	2	1	1	1	2	1	2	1	1	1	1	3	1	2	2	1	2	1	1	1	2	2	2	2
69	1A	IWB59361	11.7524		1	1	2	1	2	1	2	1	2	2	1	1	1	1	1	1	1	2	1	2	2	2	1	1	1	2	1	2	1	1	1	3	2	1	2	2	1	2	1	1	1	2	2	2	2
70	1A	IWB59361	11.7524		1	1	2	1	2	1	2	1	2	2	1	1	1	1	1	1	1	2	1	2	2	2	1	1	1	2	1	2	1	1	1	3	2	1	2	2	1	2	1	1	1	2	2	2	2
71	1A	IWB6999	17.5678		1	1	2	1	2	1	2	1	2	2	1	1	1	1	1	1	1	2	1	2	2	2	1	1	1	2	2	2	1	1	1	1	2	1	1	2	1	2	1	1	1	2	2	2	2
72	1A	IWB12589	17.5678		1	1	2	1	2	1	2	1	2	2	1	1	1	1	1	1	1	2	1	2	2	2	1	1	1	2	2	2	1	1	1	3	2	1	1	2	1	2	1	1	1	2	2	2	2
73	1A	IWB55413	17.5678		1	1	2	1	2	1	2	1	2	2	1	1	1	1	1	1	1	2	1	2	2	2	1	1	1	2	2	2	1	1	1	1	2	1	1	2	1	2	1	1	1	2	2	2	2
74	1A	IWB57005	17.8004		1	1	2	1	2	1	2	1	2	2	1	1	1	1	1	1	1	2	1	2	2	2	1	1	1	2	2	2	1	1	1	1	2	1	1	2	1	2	1	1	1	2	2	2	2
75	1A	IWB4186	18.2677		1	1	2	1	2	1	2	1	2	2	1	1	1	1	1	1	1	2	1	2	2	2	1	1	1	2	2	2	1	1	1	1	2	1	1	2	1	2	1	1	1	2	2	2	2
76	1A	IWB39517	19.9429		1	1	2	1	2	1	2	1	2	2	2	1	1	1	1	1	1	2	1	2	2	2	1	1	1	2	2	2	1	1	1	1	2	1	1	2	1	2	1	1	1	2	1	2	2
77	1A	IWB12206	19.9429		1	1	2	1	2	1	2	1	2	2	2	1	1	1	1	1	1	2	1	2	2	2	1	1	1	2	2	2	1	1	1	1	2	1	1	2	1	2	1	1	1	2	1	2	2
78	1A	IWB11301	20.1733		1	1	2	1	2	1	2	1	2	2	2	1	1	1	1	1	1	2	1	2	2	2	1	1	1	2	2	2	1	1	1	1	2	1	1	2	1	2	1	1	1	2	1	2	2
79	1A	IWB73271	20.1733		1	1	2	1	2	1	2	1	2	2	2	1	1	1	1	1	1	2	1	2	2	2	1	1	1	2	2	2	1	1	1	1	2	1	1	2	1	2	1	1	1	2	1	2	2
80	1A	IWB12166	20.1733		1	1	2	1	2	1	2	1	2	2	2	1	1	1	1	1	1	2	1	2	2	2	1	1	1	2	2	2	1	1	1	1	2	1	1	2	1	2	1	1	1	2	1	2	2
81	1A	IWB80611	20.1733		1	1	2	1	2	1	2	1	2	2	2	1	1	1	1	1	1	2	1	2	2	2	1	1	1	2	2	2	1	1	1	1	2	1	1	2	1	2	1	1	1	2	1	2	2
82	1A	IWB30651	20.1733		1	1	2	1	2	1	2	1	2	2	2	1	1	1	1	1	1	2	1	2	2	2	1	1	1	2	2	2	1	1	1	1	2	1	1	2	1	2	1	1	1	2	1	2	2
83	1A	IWB36835	20.1733		1	1	2	1	2	1	2	1	2	2	2	1	1	1	1	1	1	2	1	2	2	2	1	1	1	2	2	2	1	1	1	1	2	1	1	2	1	2	1	1	1	2	1	2	2
84	1A	IWB24379	20.1733		1	1	2	1	2	1	2	1	2	2	2	1	1	1	1	1	1	2	1	2	2	2	1	1	1	2	2	2	1	1	1	1	2	1	1	2	1	2	1	1	1	2	1	2	2
85	1A	IWB36389	20.8842		1	1	2	1	2	1	2	1	2	2	2	1	1	1	1	1	1	2	1	2	2	2	1	1	1	2	2	2	1	1	1	3	2	1	1	2	1	2	1	1	1	2	1	2	2
86	1A	IWB21573	21.5952		1	1	2	1	2	1	2	1	2	2	2	1	1	1	1	1	1	2	1	2	2	2	1	1	1	2	2	2	1	1	1	3	2	1	1	2	1	2	1	1	1	2	1	2	2
87	1A	IWB16911	21.5952		1	1	2	1	2	1	2	1	2	2	2	1	1	1	1	1	1	2	1	2	2	2	1	1	1	2	2	2	1	1	1	2	2	1	1	2	1	2	1	1	1	2	1	2	2
88	1A	IWB42450	21.5952		1	1	2	1	3	1	2	1	2	2	2	1	1	1	1	1	1	2	1	2	2	2	1	1	1	2	2	2	1	1	1	3	2	1	1	2	1	2	1	1	1	2	1	2	2
89	1A	IWB71173	21.5952		1	1	2	1	2	1	2	1	2	2	2	1	1	1	1	1	1	2	1	2	2	2	1	1	1	2	2	2	1	1	1	1	2	1	1	2	1	2	1	1	1	2	1	2	2
90	1A	IWB11053	21.5952		1	1	2	1	2	1	2	1	2	2	2	1	1	1	1	1	1	2	1	2	2	2	1	1	1	2	2	2	1	1	1	1	2	1	1	2	1	2	1	1	1	2	1	3	2
91	1A	IWB3662	21.5952		1	1	2	1	2	1	2	1	2	2	2	1	1	1	1	1	1	2	1	2	2	2	1	1	1	2	2	2	1	1	1	3	2	1	1	2	1	2	1	1	1	2	1	2	2
92	1A	IWB76292	21.5952		1	1	2	1	2	1	2	1	2	2	2	1	1	1	1	1	1	2	1	2	2	2	1	1	1	2	2	2	1	1	1	3	2	3	1	2	1	2	1	1	1	2	1	2	2
93	1A	IWB78760	21.5952		1	1	2	1	2	1	2	1	2	2	2	1	1	1	1	1	1	2	1	2	2	2	1	1	1	2	2	2	1	1	1	3	2	3	1	2	1	2	1	1	1	2	1	2	2
94	1A	IWB45180	21.5952		1	1	2	1	2	1	2	1	2	2	2	1	1	1	1	1	1	2	1	2	2	2	1	1	1	2	2	2	1	1	1	1	2	1	1	2	1	2	1	1	1	2	1	2	2
95	1A	IWB43004	21.5952		1	1	2	1	2	1	2	1	2	2	2	1	1	1	1	1	1	2	1	2	2	2	1	1	1	2	2	2	1	1	1	1	2	1	1	2	1	2	1	1	1	2	1	2	2
96	1A	IWB71172	21.5952		1	1	2	1	2	1	2	1	2	2	2	1	1	1	1	1	1	2	1	2	2	2	1	1	1	2	2	2	1	1	1	1	2	1	1	2	1	2	1	1	1	2	1	2	2
97	1A	IWB387	21.5952		1	1	2	1	2	1	2	1	2	2	2	1	1	1	1	1	1	2	1	2	2	2	1	1	1	2	2	2	1	1	1	1	2	1	1	2	1	2	1	1	1	2	1	2	2
98	1A	IWB11602	21.5952		1	1	2	1	2	1	2	1	2	2	2	1	1	1	1	1	1	2	1	2	2	2	1	1	1	2	2	2	1	1	1	1	2	1	1	2	1	2	1	1	1	2	1	2	2
99	1A	IWB74770	21.5952		1	1	2	1	2	1	3	1	2	2	2	1	1	1	1	1	1	2	1	2	2	2	1	1	1	2	2	2	1	1	1	3	2	1	1	2	1	2	1	1	1	2	1	2	2
100	1A	IWB7096	21.5952		1	1	2	1	2	1	2	1	2	2	2	1	1	1	3	1	1	2	1	2	2	2	1	1	1	2	2	2	1	1	1	1	2	1	1	2	1	2	1	1	1	2	1	2	2
101	1A	IWB55079	21.5952		1	1	2	1	2	1	2	1	2	2	2	1	1	1	1	1	1	2	1	2	2	2	1	1	1	2	2	2	1	1	1	1	2	1	1	2	1	2	1	1	1	2	1	2	2
102	1A	IWB13009	21.5952		1	1	2	1	2	1	2	1	2	2	2	1	1	1	1	1	1	2	1	2	2	2	1	1	1	2	2	2	1	1	1	1	2	1	1	2	1	2	1	1	1	2	1	2	2
103	1A	IWB9329	37.4421	*	1	1	2	1	2	1	2	2	2	2	2	1	1	1	1	2	1	1	2	2	2	2	1	1	1	2	2	1	1	1	1	1	2	2	1	2	2	1	1	1	2	2	1	2	2
104	1A	IWB57361	37.4421	*	1	1	2	1	2	1	2	2	2	2	2	1	1	1	1	2	1	1	2	2	2	2	1	1	1	2	2	1	1	1	1	1	2	2	1	2	2	1	1	1	2	2	1	2	2
105	1A	IWB36540	37.4421	*	1	1	2	1	2	1	2	2	2	2	2	1	1	1	1	2	1	1	2	2	2	2	1	1	1	2	2	1	1	1	1	1	2	2	1	2	2	1	1	1	2	2	1	2	2
106	1A	IWB59245	37.4421	*	1	1	2	1	2	1	2	2	2	2	2	1	1	1	1	2	1	1	2	2	2	2	1	1	1	2	2	1	1	1	1	1	2	2	1	2	2	1	1	1	2	2	1	2	2
107	1A	IWB50401	37.4421	*	1	1	2	1	2	1	2	2	2	2	2	1	1	1	1	2	1	1	2	2	2	2	1	1	1	2	2	1	1	1	1	3	2	2	1	2	2	1	1	1	2	2	1	2	2
108	1A	IWB9541	37.4421	*	1	1	2	1	2	1	2	2	2	2	2	1	1	1	1	2	1	1	2	2	2	2	1	1	1	2	2	1	1	1	1	3	2	2	1	2	2	1	1	1	2	2	1	2	2
109	1A	IWB31763	37.4421	*	1	1	2	1	2	1	2	2	2	2	2	1	1	1	1	2	1	1	2	2	2	2	1	1	1	2	2	1	1	1	1	3	2	2	1	2	2	1	1	1	2	2	1	2	2
110	1A	IWB59888	37.4421	*	1	1	2	1	2	1	2	2	2	2	2	1	1	1	1	2	1	1	2	2	2	2	1	1	1	2	2	1	1	1	1	1	2	2	1	2	2	1	1	1	2	2	1	2	2
111	1A	IWB31764	37.4421	*	1	1	2	1	2	1	2	2	2	2	2	1	1	1	1	2	1	1	2	2	2	2	1	1	1	2	2	1	1	1	1	3	2	2	1	2	2	1	1	1	2	2	1	2	2
112	1A	IWB80744	42.3042	*	1	1	2	1	1	1	2	2	2	2	2	1	1	1	1	2	1	1	2	2	2	2	1	2	1	2	2	1	1	1	1	3	2	2	1	2	2	1	1	1	2	2	1	2	2
113	1A	IWB78238	42.3042	*	1	1	2	1	1	1	2	2	2	2	2	1	1	1	1	2	1	1	2	2	2	2	1	2	1	2	2	1	1	1	1	3	2	2	1	2	2	1	1	1	2	2	1	2	2
114	1A	IWB60691	42.3042		1	1	2	1	1	1	2	2	2	2	2	1	1	1	1	2	1	1	2	2	2	2	1	2	1	2	2	1	1	1	1	1	2	2	1	2	2	1	1	1	2	2	1	2	2
115	1A	IWB80500	42.3042	*	1	1	2	1	1	1	2	2	2	2	2	1	1	1	1	2	1	1	2	2	2	2	1	2	1	2	2	1	1	1	1	1	2	2	1	2	3	1	1	1	2	2	1	2	2
116	1A	IWB14138	42.3042	*	1	1	2	1	1	1	2	2	2	2	2	1	1	1	1	2	1	1	2	2	2	2	1	2	1	2	2	1	1	1	1	1	2	2	1	2	2	1	1	1	2	2	1	2	2
117	1A	IWB78358	42.3042	*	1	1	2	1	1	1	2	2	2	2	2	1	1	1	1	2	1	1	2	2	2	2	1	2	1	2	2	1	1	1	1	1	2	2	1	2	2	1	1	1	2	2	1	2	2
118	1A	IWB66061	42.3042	*	1	1	2	1	1	1	2	2	2	2	2	1	1	1	1	2	1	1	2	2	2	2	1	2	1	2	2	1	1	1	1	1	2	2	1	2	2	1	1	1	2	2	1	2	2
119	1A	IWB54638	42.3042	*	1	1	2	1	1	1	2	2	2	2	2	1	1	1	1	2	1	1	2	2	2	2	1	2	1	2	2	1	1	1	1	1	2	2	1	2	2	1	1	1	2	2	1	2	2
120	1A	IWB24259	42.5357		1	1	2	1	1	1	2	2	2	2	2	1	1	1	1	2	1	1	2	2	2	2	1	2	1	2	2	1	1	1	1	1	2	2	1	2	2	1	1	1	2	2	1	2	2
121	1A	IWB54363	42.5357	*	1	1	2	1	1	1	2	2	2	2	2	1	1	1	1	2	1	1	2	2	2	2	1	2	1	2	2	1	1	1	1	1	2	2	1	2	2	1	1	1	2	2	1	2	2
122	1A	IWB41059	42.9986	*	1	1	2	1	1	1	2	2	2	2	2	1	2	1	1	2	1	1	2	2	2	2	1	2	1	2	2	1	1	1	1	1	2	2	1	2	2	1	1	1	2	2	1	2	2
123	1A	IWB21708	42.9986		1	1	2	1	1	1	2	2	2	2	2	1	2	1	1	2	1	1	2	2	2	2	1	2	1	2	2	1	1	1	1	3	2	2	1	2	2	1	1	1	2	2	1	2	2
124	1A	IWB28549	43.2334		1	1	2	1	1	1	2	2	2	2	2	1	2	1	1	2	1	1	2	2	2	2	1	2	1	2	2	1	1	1	1	1	2	2	1	2	2	1	1	1	2	2	1	2	2
125	1A	IWB3682	43.2334		1	1	2	1	1	1	2	2	2	2	2	1	2	1	1	2	1	1	2	2	2	2	1	2	1	2	2	1	1	1	1	1	2	2	1	2	2	1	1	1	2	2	1	2	2
126	1A	IWB54031	43.2334		1	1	2	1	1	1	2	2	2	2	2	1	2	1	1	2	1	1	2	2	2	2	1	2	1	2	2	1	1	1	1	3	2	2	1	2	2	1	1	1	2	2	1	2	2
127	1A	IWB3334	43.2334		1	1	2	1	1	1	2	2	2	2	2	1	2	1	1	2	1	1	2	2	2	2	1	2	1	2	2	1	1	1	1	3	2	2	1	2	2	1	1	1	2	2	1	2	2
128	1A	IWB79906	43.2334		1	1	2	1	1	1	2	2	2	2	2	1	2	1	1	2	1	1	2	2	2	2	1	2	1	2	2	1	1	1	1	1	2	2	1	2	2	1	1	1	2	2	1	2	2
129	1A	IWB40979	43.2334		1	1	2	1	1	1	2	2	2	2	2	1	2	1	1	2	1	1	2	2	2	2	1	2	1	2	2	1	1	1	1	1	2	2	1	2	2	1	1	1	2	2	1	2	2
130	1A	IWB31935	43.2334		1	1	2	1	1	1	2	2	2	2	2	1	2	1	1	2	1	1	2	2	2	2	1	2	1	2	2	1	1	1	1	1	2	2	1	2	2	1	1	1	2	2	1	2	2
131	1A	IWB81049	43.4659		1	1	2	1	1	1	2	2	2	2	2	1	2	1	1	2	1	1	2	2	2	2	1	2	1	2	2	1	1	1	1	1	2	2	1	2	2	1	1	1	2	2	1	2	2
132	1A	IWB6471	43.4659		1	1	2	1	1	1	2	2	2	2	2	1	2	1	1	2	1	1	2	2	2	2	1	2	1	2	2	1	1	1	1	1	2	2	1	2	2	1	1	1	2	2	1	2	2
133	1A	IWB48819	43.4659		1	1	2	1	1	1	2	2	2	2	2	1	2	1	1	2	1	1	2	2	2	2	1	2	1	2	2	1	1	1	1	1	2	2	1	2	2	1	1	1	2	2	1	2	2
134	1A	IWB22792	43.4659		1	1	2	1	1	1	2	2	2	2	2	1	2	1	1	2	1	1	2	2	2	2	1	2	1	2	2	1	1	1	1	1	2	2	1	2	2	1	1	1	2	2	1	2	2
135	1A	IWB42659	43.4659		1	1	2	1	1	1	2	2	2	2	2	1	2	1	1	2	1	1	2	2	2	2	1	2	1	2	2	1	1	1	1	3	2	2	1	2	2	1	1	1	2	2	1	2	2
136	1A	IWB34995	43.4659		1	1	2	1	1	1	2	2	2	2	2	1	2	1	1	2	1	1	2	2	2	2	1	2	1	2	2	1	1	1	1	1	2	2	1	2	2	1	1	1	2	2	1	2	2
137	1A	IWB73652	43.6974		1	1	2	1	1	1	2	2	2	2	2	1	2	1	1	2	1	1	2	2	2	2	1	2	1	2	2	1	1	1	1	1	2	2	1	2	2	1	1	1	2	2	1	2	2
138	1A	IWB44046	43.6974		1	1	2	1	1	1	2	2	2	2	2	1	2	1	1	2	1	1	2	2	2	2	1	2	1	2	2	1	1	1	1	3	2	2	1	2	2	1	1	1	2	2	1	2	2
139	1A	IWB44045	43.6974		1	1	2	1	1	1	2	2	2	2	2	1	2	1	1	2	1	1	2	2	2	2	1	2	1	2	2	1	1	1	1	1	2	2	1	2	2	1	1	1	2	2	1	2	2
140	1A	IWB61685	44.6365		2	1	2	1	1	1	2	2	2	2	2	1	2	1	1	2	1	1	2	2	2	2	1	2	1	2	2	1	1	1	1	1	2	2	1	2	2	1	1	1	2	2	1	2	2
141	1A	IWB31932	45.1038		2	1	2	1	1	1	2	2	2	2	2	1	2	1	1	2	1	1	2	2	2	2	1	2	1	2	2	1	1	1	1	1	2	2	1	2	2	1	1	1	2	2	1	2	2
142	1A	IWB31602	45.1038	*	2	1	2	1	3	1	2	2	2	2	2	1	2	1	1	2	1	1	2	2	2	2	1	2	1	2	2	1	1	1	1	1	2	2	1	2	2	1	1	1	2	2	1	2	2
143	1A	IWB75585	45.1038	*	2	1	2	1	1	1	2	2	2	2	2	1	2	1	1	2	1	1	2	2	2	2	1	2	1	2	2	1	1	1	1	1	2	2	1	2	2	1	1	1	2	2	1	2	2
144	1A	IWB51485	45.8015		2	1	2	1	1	1	2	2	2	2	2	1	2	1	1	2	1	1	2	2	2	2	1	2	1	2	2	1	1	1	1	1	2	1	1	2	2	1	1	1	2	2	1	2	2
145	1A	IWB68106	46.0351		2	1	2	1	1	1	2	2	2	2	2	1	2	1	1	2	1	1	2	2	2	2	1	2	1	2	2	1	1	1	1	3	2	1	1	2	2	1	1	1	2	2	1	2	2
146	1A	IWB68107	46.0351		2	1	2	1	1	1	2	2	2	2	2	1	2	1	1	2	1	1	2	2	2	2	1	2	1	2	2	1	1	1	1	1	2	1	1	2	2	1	1	1	2	2	1	2	2
147	1A	IWB66891	46.9786		2	1	2	1	1	1	2	2	2	2	2	1	2	1	1	2	1	1	2	2	2	2	1	2	1	2	2	1	1	1	1	3	2	1	1	2	2	1	1	1	2	2	1	2	2
148	1A	IWB72800	46.9786		2	1	2	1	1	1	2	2	2	2	2	1	2	1	1	2	1	1	2	2	2	2	1	2	1	2	2	1	1	1	1	1	2	1	1	2	2	1	1	1	2	2	1	2	2
149	1A	IWB72799	46.9786		2	1	2	1	1	1	2	2	2	2	2	1	2	1	1	2	1	1	2	2	2	2	1	2	1	2	2	1	1	1	1	3	2	1	1	2	2	1	1	1	2	2	1	2	2
150	1A	IWB66889	46.9786		2	1	2	1	1	1	2	2	2	2	2	1	2	1	1	2	1	1	2	2	2	2	1	2	1	2	2	1	1	1	1	1	2	1	1	2	2	1	1	1	2	2	1	2	2
151	1A	IWB6538	47.9177		2	1	2	1	1	1	2	2	2	2	2	1	2	1	1	2	1	1	2	2	2	2	1	2	1	2	2	1	1	1	1	1	2	1	1	2	2	1	1	1	2	2	1	2	2
152	1A	IWB50206	47.9177		2	1	2	1	1	1	2	2	2	2	2	1	2	1	1	2	1	1	2	2	2	2	1	2	1	2	2	1	1	1	1	1	2	1	1	2	2	1	1	1	2	2	1	2	2
153	1A	IWB71772	47.9177		2	1	2	1	1	1	2	2	2	2	2	1	2	1	1	2	1	1	2	2	2	2	1	2	1	2	2	1	1	1	1	1	2	1	1	2	2	1	1	1	2	2	1	2	2
154	1A	IWB35066	47.9177		2	1	2	1	1	1	2	2	2	2	2	1	2	1	1	2	1	1	2	2	2	2	1	2	1	2	2	1	1	1	1	1	2	1	1	2	2	1	1	1	2	2	1	2	2
155	1A	IWB73401	48.3828		2	1	2	1	1	1	2	2	2	2	2	1	2	1	1	2	1	1	2	2	2	2	1	2	1	2	2	1	1	1	1	1	2	1	1	2	2	1	1	1	2	2	1	2	2
156	1A	IWB22052	49.3352		2	1	2	1	1	1	2	2	1	2	2	1	2	1	1	2	1	1	2	2	2	2	1	2	1	2	2	1	1	1	1	1	2	1	1	2	2	1	1	1	2	2	1	2	2
157	1A	IWB38267	49.3352		2	1	2	1	1	1	2	2	1	2	2	1	2	1	1	2	1	1	2	2	2	2	1	2	1	2	2	1	1	1	1	3	2	1	1	2	2	1	1	1	2	2	1	2	2
158	1A	IWB10025	49.3352		2	1	2	1	1	1	2	2	1	2	2	1	2	1	1	2	1	1	2	2	2	2	1	2	1	2	2	1	1	1	1	3	2	1	1	2	2	1	1	1	2	2	1	2	2
159	1A	IWB41444	49.3352		2	1	2	1	1	1	2	2	1	2	2	1	2	1	1	2	1	1	2	2	2	2	1	2	1	2	2	1	1	1	1	1	2	1	1	2	2	1	1	1	2	2	1	2	2
160	1A	IWB59951	49.3352		2	1	2	1	1	1	2	2	1	2	2	1	2	1	1	2	1	1	2	2	2	2	1	2	1	2	2	1	1	1	1	1	2	1	1	2	2	1	1	1	2	2	1	2	2
161	1A	IWB45930	49.3352		2	1	2	1	1	1	2	2	1	2	2	1	2	1	1	2	1	1	2	2	2	2	1	2	1	2	2	1	1	1	1	1	2	1	1	2	2	1	1	1	2	2	1	2	2
162	1A	IWB30674	49.3352		2	1	2	1	1	1	2	2	1	2	2	1	2	1	1	2	1	1	2	2	2	2	1	2	1	2	2	1	1	1	1	1	2	1	1	2	2	1	1	1	2	2	1	2	2
163	1A	IWB7075	49.5646		2	1	2	1	1	1	2	2	1	2	2	1	2	1	1	2	1	1	2	2	2	2	1	2	1	2	2	1	2	1	1	1	2	1	1	2	2	1	1	1	2	2	1	2	2
164	1A	IWB3515	49.5646		2	1	2	1	1	1	2	2	1	2	2	1	2	1	1	2	1	1	2	2	2	2	1	2	1	2	2	1	2	1	1	1	2	1	1	2	2	1	1	1	2	2	1	2	2
165	1A	IWB71446	49.5646		2	1	2	1	1	1	2	2	1	2	2	1	2	1	1	2	1	1	2	2	2	2	1	2	1	2	2	1	2	1	1	1	2	1	1	2	2	1	1	1	2	2	1	2	2
166	1A	IWB72042	49.5646		2	1	2	1	1	1	2	2	1	2	2	1	2	1	1	2	1	1	2	2	2	2	1	2	1	2	2	1	2	1	1	1	2	1	1	2	2	1	1	1	2	2	1	2	2
167	1A	IWB43982	49.5646		2	1	2	1	1	1	2	2	1	2	2	1	2	1	1	2	1	1	2	2	2	2	1	2	1	2	2	1	2	1	1	1	2	1	1	2	2	1	1	1	2	2	1	2	2
168	1A	IWB7300	49.5646		2	1	2	1	1	1	2	2	1	2	2	1	2	1	1	2	1	1	2	2	2	2	1	2	1	2	2	1	2	1	1	1	2	1	1	2	2	1	1	1	2	2	1	2	2
169	1A	IWB73155	49.5646		2	1	2	1	1	1	2	2	1	2	2	1	2	1	1	2	1	1	2	2	2	2	1	2	1	2	2	1	2	1	1	1	2	1	1	2	2	1	1	1	2	2	1	2	2
170	1A	IWB12486	49.5646		2	1	2	1	1	1	2	2	1	2	2	1	2	1	1	2	1	1	2	2	2	2	1	2	1	2	2	1	2	1	1	1	2	1	1	2	2	1	1	1	2	2	1	2	2
171	1A	IWB6583	49.5646		2	1	2	1	1	1	2	2	1	2	2	1	2	1	1	2	1	1	2	2	2	2	1	2	1	2	2	1	2	1	1	1	2	1	1	2	2	1	1	1	2	2	1	2	2
172	1A	IWB26888	49.5646		2	1	2	1	1	1	2	2	1	2	2	1	2	1	1	2	1	1	2	2	2	2	1	2	1	2	2	1	2	1	1	1	2	1	1	2	2	1	1	1	2	2	1	2	2
173	1A	IWB9220	49.5646		2	1	2	1	1	1	2	2	1	2	2	1	2	1	1	2	1	1	2	2	2	2	1	2	1	2	2	1	2	1	1	1	2	1	1	2	2	1	1	1	2	2	1	2	2
174	1A	IWB72041	49.5646		2	1	2	1	1	1	2	2	1	2	2	1	2	1	1	2	1	1	2	2	2	2	1	2	1	2	2	1	2	1	1	1	2	1	1	2	2	1	1	1	2	2	1	2	2
175	1A	IWB74997	49.5646		2	1	2	1	1	1	2	2	1	2	2	1	2	1	1	2	1	1	2	2	2	2	1	2	1	2	2	1	2	1	1	1	2	1	1	2	2	1	1	1	2	2	1	2	2
176	1A	IWB47241	49.5646		2	1	2	1	1	1	2	2	1	2	2	1	2	1	1	2	1	1	2	2	2	2	1	2	1	2	2	1	2	1	1	1	2	1	1	2	2	1	1	1	2	2	1	2	2
177	1A	IWB74010	49.5646		2	1	2	1	1	1	2	2	1	2	2	1	2	1	1	2	1	1	2	2	2	2	1	2	1	2	2	1	2	1	1	3	2	1	1	2	2	1	1	1	2	2	1	2	2
178	1A	IWB57837	50.0297		2	1	2	1	1	1	2	2	1	2	2	1	2	1	1	2	1	1	2	2	2	2	2	2	1	2	2	1	2	1	1	2	2	1	1	2	2	1	1	1	2	2	1	2	2
179	1A	IWB76376	50.0297		2	1	2	1	1	1	2	2	1	2	2	1	2	1	1	2	1	1	2	2	2	2	2	2	1	2	2	1	2	1	1	2	2	1	1	2	2	1	1	1	2	2	1	2	2
180	1A	IWB57838	50.0297		2	1	2	1	1	1	2	2	1	2	2	1	2	1	1	2	1	1	2	2	2	2	2	2	1	2	2	1	2	1	1	3	2	1	1	2	2	1	1	1	2	2	1	2	2
181	1A	IWB52279	50.0297		2	1	2	1	1	1	2	3	1	2	2	1	2	1	1	2	1	1	2	2	2	2	2	2	1	2	2	1	2	1	1	2	2	1	1	2	2	1	1	1	2	2	1	2	2
182	1A	IWB21167	51.963		2	1	2	1	1	1	2	1	1	2	2	1	2	1	1	2	1	1	2	2	2	2	2	2	1	2	2	1	2	1	1	2	2	1	1	2	2	1	1	1	2	2	2	2	2
183	1A	IWB27624	52.8933		2	1	2	1	1	1	2	1	1	2	2	1	2	1	2	2	1	1	2	2	2	2	2	2	1	2	2	1	2	1	1	2	2	1	1	2	2	1	1	1	2	2	2	2	2
184	1A	IWB34385	53.3542		2	1	2	1	1	1	2	1	1	2	2	1	2	1	2	2	1	1	2	2	2	2	2	2	1	2	2	1	2	2	1	2	2	1	1	2	2	1	1	1	2	2	2	2	2
185	1A	IWB77723	53.3542		2	1	2	1	1	1	2	1	1	2	2	1	2	1	2	2	1	1	2	2	2	2	2	2	1	2	2	1	2	2	1	2	2	1	1	2	2	1	1	1	2	2	2	2	2
186	1A	IWB20438	53.3542		2	1	2	1	1	1	2	1	1	2	2	1	2	1	2	2	1	1	2	2	2	2	2	2	1	2	2	1	2	2	1	3	2	1	1	2	2	1	1	1	2	2	2	2	2
187	1A	IWB43050	53.3542		2	1	2	1	1	1	2	1	1	2	2	1	2	1	2	2	1	1	2	2	2	2	2	2	1	2	2	1	2	2	1	2	2	1	1	2	2	1	1	1	2	2	2	2	2
188	1A	IWB35478	53.3542		2	1	2	1	1	1	2	1	1	2	2	1	2	1	2	2	1	1	2	2	2	2	2	2	1	2	2	1	2	2	1	2	2	1	1	2	2	1	1	1	2	2	2	2	2
189	1A	IWB76373	53.3542		2	1	2	1	1	1	2	1	1	2	2	1	2	1	2	2	1	1	2	2	2	2	2	2	1	2	2	1	2	2	1	2	2	1	1	2	2	1	1	1	2	2	2	2	2
190	1A	IWB34698	53.3542		2	1	2	1	1	1	2	1	1	2	2	1	2	1	2	2	1	1	2	2	2	2	2	2	1	2	2	1	2	2	1	2	2	1	1	2	2	1	1	1	2	2	2	2	2
191	1A	IWB35435	53.3542		2	1	2	1	1	1	2	1	1	2	2	1	2	1	2	2	1	1	2	2	2	2	2	2	1	2	2	1	2	2	1	2	2	1	1	2	2	1	1	1	2	2	2	2	2
192	1A	IWB81405	53.3542		2	1	2	1	1	1	2	1	1	2	2	1	2	1	2	2	1	1	2	2	2	2	2	2	1	2	2	1	2	2	1	2	2	1	1	2	2	1	1	1	2	2	2	2	2
193	1A	IWB79077	53.3542		2	1	2	1	1	1	2	1	1	2	2	1	2	1	2	2	1	1	2	2	2	2	2	2	1	2	2	1	2	2	1	2	2	1	1	2	2	1	1	1	2	2	2	2	2
194	1A	IWB52278	53.3542		2	1	2	1	1	1	2	1	1	2	2	1	2	1	2	2	1	1	2	2	2	2	2	2	1	2	2	1	2	2	1	2	2	1	1	2	2	1	1	1	2	2	2	2	2
195	1A	IWB20986	53.3542		2	1	2	1	1	1	2	1	1	2	2	1	2	1	2	2	1	1	2	2	2	2	2	2	1	2	2	1	2	2	1	2	2	1	1	2	2	1	1	1	2	2	2	2	2
196	1A	IWB76270	53.3542		2	1	2	1	1	1	2	1	1	2	2	1	2	1	2	2	1	1	2	2	2	2	2	2	1	2	2	1	2	2	1	2	2	1	1	2	2	1	1	1	2	2	2	2	2
197	1A	IWB77722	53.5835		2	1	2	1	1	1	2	1	1	2	2	1	2	1	2	2	1	1	2	2	2	2	2	2	1	2	2	1	2	2	1	2	2	1	1	2	2	1	1	1	2	2	2	2	2
198	1A	IWB45088	53.5835		2	1	2	1	1	1	2	1	1	2	2	1	2	1	2	2	1	1	2	2	2	2	2	2	1	2	2	1	2	2	1	2	2	1	1	2	2	1	1	1	2	2	2	2	2
199	1A	IWB45874	53.8129		2	1	2	1	1	1	2	1	1	2	2	1	2	1	2	2	1	1	2	2	2	2	2	2	1	2	2	1	2	2	1	2	2	1	1	2	2	1	1	1	2	2	2	2	2
200	1A	IWB2715	53.8129		2	1	2	1	1	1	2	1	1	2	2	1	2	1	2	2	1	1	2	2	2	2	2	2	1	2	2	1	2	2	1	2	2	1	1	2	2	1	1	1	2	2	2	2	2
201	1A	IWB75674	53.8129		2	1	2	1	1	1	2	1	1	2	2	1	2	1	2	2	1	1	2	2	2	2	2	2	1	2	2	1	2	2	1	2	2	1	1	2	2	1	1	1	2	2	2	2	2
202	1A	IWB28131	54.0422		2	1	2	1	1	1	2	1	1	2	2	1	2	1	2	2	1	1	2	2	2	2	2	2	1	2	2	1	2	2	1	2	2	1	1	2	2	1	1	1	2	2	2	2	2
203	1A	IWB53174	54.0422		2	1	2	1	1	1	2	1	1	2	2	1	2	1	2	2	1	1	2	2	2	2	2	2	1	2	2	1	2	2	1	2	2	1	1	2	2	1	1	1	2	2	2	2	2
204	1A	IWB63226	54.5073		2	1	2	1	1	1	2	1	1	2	1	1	2	1	2	2	1	1	2	1	2	2	2	2	1	2	2	1	2	2	1	2	2	1	1	2	2	1	1	1	2	2	2	2	2
205	1A	IWB2429	54.5073		2	1	2	1	1	1	2	1	1	2	1	1	2	1	2	2	1	1	2	1	2	2	2	2	1	2	2	1	2	2	1	3	2	1	1	2	2	1	1	1	2	2	2	2	2
206	1A	IWB46905	54.5073		2	1	2	1	1	1	2	1	1	2	1	1	2	1	2	2	1	1	2	1	2	2	2	2	1	2	2	1	2	2	1	2	2	1	1	2	2	1	1	1	2	2	2	2	2
207	1A	IWB69365	56.4313		2	1	2	2	1	1	2	1	1	2	1	1	2	1	2	2	1	1	2	1	2	2	2	2	1	2	2	1	2	2	1	3	2	3	1	2	2	1	1	1	2	2	2	2	2
208	1A	IWB23847	57.6164		2	1	2	2	1	1	1	1	1	2	1	1	2	1	2	2	1	1	2	1	2	2	2	2	2	2	2	1	2	2	1	3	2	1	1	2	2	1	1	1	2	2	2	2	2
209	1A	IWB78144	57.6164		2	1	2	2	1	1	1	1	1	2	1	1	2	1	2	2	1	1	2	1	2	2	2	2	2	2	2	1	2	2	1	2	2	1	1	2	2	1	1	1	2	2	2	2	2
210	1A	IWB22559	57.6164		2	1	2	2	1	1	1	1	1	2	1	1	2	1	2	2	1	1	2	1	2	2	2	2	2	2	2	1	2	2	1	2	2	1	1	2	2	1	1	1	2	2	2	2	2
211	1A	IWB51652	57.6164		2	1	2	2	1	1	1	1	1	2	1	1	2	1	2	2	1	1	2	1	2	2	2	2	2	2	2	1	2	2	1	2	2	1	1	2	2	1	1	1	2	2	2	2	2
212	1A	IWB57895	57.6164		2	1	2	2	1	1	1	1	1	2	1	1	2	1	2	2	1	1	2	1	2	2	2	2	2	2	2	1	2	2	1	2	2	1	1	2	2	1	1	1	2	2	2	2	2
213	1A	IWB22206	57.6164		2	1	2	2	1	1	1	1	1	2	1	1	2	1	2	2	1	1	2	1	2	2	2	2	2	2	2	1	2	2	1	2	2	1	1	2	2	1	1	1	2	2	2	2	2
214	1A	IWB43194	57.6164		2	1	2	2	1	1	1	1	1	2	1	1	2	1	2	2	1	1	2	1	2	2	2	2	2	2	2	1	2	2	1	2	2	1	1	2	2	1	1	1	2	2	2	2	2
215	1A	IWB78142	57.6164		2	1	2	2	1	1	1	1	1	2	1	1	2	1	2	2	1	1	2	1	2	2	2	2	2	2	2	1	2	2	1	2	2	1	1	2	2	1	1	1	2	2	2	2	2
216	1A	IWB9258	57.6164		2	1	2	2	1	1	1	1	1	2	1	1	2	1	2	2	1	1	2	1	2	2	2	2	2	2	2	1	2	2	1	3	2	1	1	2	2	1	1	1	2	2	2	2	2
217	1A	IWB76674	57.8489		2	1	2	2	1	1	1	1	1	2	1	1	2	1	2	2	1	1	2	1	2	2	2	2	2	2	2	1	2	2	1	1	2	1	1	2	2	1	1	1	2	2	2	2	2
218	1A	IWB8898	58.3162		2	1	2	2	1	1	1	1	1	2	1	1	2	1	2	2	1	1	2	1	2	2	2	2	2	2	2	1	2	2	1	3	2	1	1	2	2	1	1	1	2	2	2	2	2
219	1A	IWB11660	58.3162		2	1	2	2	3	1	1	1	1	2	1	1	2	1	2	2	1	1	2	1	2	2	2	2	2	2	2	1	2	2	1	3	2	1	1	2	2	1	1	1	2	2	2	2	2
220	1A	IWB24088	58.3162		2	1	2	2	1	1	1	1	1	2	1	1	2	1	2	2	1	1	2	1	2	2	2	2	2	2	2	1	2	2	1	2	2	1	1	2	2	1	1	1	2	2	2	2	2
221	1A	IWB24089	58.3162		2	1	2	2	1	1	1	1	1	2	1	1	2	1	2	2	1	1	2	1	2	2	2	2	2	2	2	1	2	2	1	2	2	1	1	2	2	1	1	1	2	2	2	2	2
222	1A	IWB78128	58.5456		2	1	2	2	1	1	1	1	1	2	1	1	2	1	2	2	1	1	2	1	2	2	2	2	2	2	2	1	2	2	1	2	2	1	1	2	2	1	1	1	2	2	2	1	2
223	1A	IWB78739	58.5456		2	1	2	2	1	1	1	1	1	2	1	1	2	1	2	2	1	1	2	1	2	2	2	2	2	2	2	1	2	2	1	2	2	1	1	2	2	1	1	1	2	2	2	1	2
224	1A	IWB59770	58.5456		2	1	2	2	1	1	1	1	1	2	1	1	2	1	2	2	1	1	2	1	2	2	2	2	2	2	2	1	2	2	1	2	2	1	1	2	2	1	1	1	2	2	2	1	2
225	1A	IWB35436	58.5456		2	1	2	2	1	1	1	1	1	2	1	1	2	1	2	2	1	1	2	1	2	2	2	2	2	2	2	1	2	2	1	3	2	1	1	2	2	1	1	1	2	2	2	1	2
226	1A	IWB65314	58.5456		2	1	2	2	1	1	1	1	1	2	1	1	2	1	2	2	1	1	2	1	2	2	2	2	2	2	2	1	2	2	1	2	2	1	1	2	2	1	1	1	2	2	2	1	2
227	1A	IWB20955	58.5456		2	1	2	2	1	1	1	1	1	2	1	1	2	1	2	2	1	1	2	1	2	2	2	2	2	2	2	1	2	2	1	2	2	1	1	2	2	1	1	1	2	2	2	1	2
228	1A	IWB20954	58.5456		2	1	2	2	1	1	1	1	1	2	1	1	2	1	2	2	1	1	2	1	2	2	2	2	2	2	2	1	2	2	1	2	2	1	1	2	2	1	1	1	2	2	2	1	2
229	1A	IWB4472	58.5456		2	1	2	2	1	1	1	1	1	2	1	1	2	1	2	2	1	1	2	1	2	2	2	2	2	2	2	1	2	2	1	3	2	1	1	2	2	1	1	1	2	2	2	1	2
230	1A	IWB32307	58.5456		2	1	2	2	1	1	1	1	1	2	1	1	2	1	2	2	1	1	2	1	2	2	2	2	2	2	2	1	2	2	1	2	2	1	1	2	2	1	1	1	2	2	2	1	2
231	1A	IWB65705	58.5456		2	1	2	2	1	1	1	1	1	2	1	1	2	1	2	2	1	1	2	1	2	2	2	2	2	2	2	1	2	2	1	2	2	1	1	2	2	1	1	1	2	2	2	1	2
232	1A	IWB59768	58.5456		2	1	2	2	1	1	1	1	1	2	1	1	2	1	2	2	1	1	2	1	2	2	2	2	2	2	2	1	2	2	1	2	2	1	1	2	2	1	1	1	2	2	2	1	2
233	1A	IWB35080	58.5456		2	1	2	2	1	1	1	1	1	2	1	1	2	1	2	2	1	1	2	1	2	2	2	2	2	2	2	1	2	2	1	2	2	1	1	2	2	1	1	1	2	2	2	1	2
234	1A	IWB13493	58.7739		2	1	2	2	1	1	1	1	1	2	1	1	2	1	2	2	1	1	2	1	2	2	2	2	2	2	2	1	2	2	1	2	2	1	1	2	2	1	1	1	2	2	2	1	2
235	1A	IWB13492	58.7739		2	1	2	2	1	1	1	1	1	3	1	1	2	1	2	2	1	1	2	1	2	2	2	2	2	2	2	1	2	2	1	3	2	1	1	2	2	1	1	1	2	2	2	1	2
236	1A	IWB59094	58.7739		2	1	2	2	1	1	1	1	1	2	1	1	2	1	2	2	1	1	2	1	2	2	2	2	2	2	2	1	2	2	1	2	2	1	1	2	2	1	1	1	2	2	2	1	2
237	1A	IWB45374	58.7739		2	1	2	2	1	1	1	1	1	2	1	1	2	1	2	2	1	1	2	1	2	2	2	2	2	2	2	1	2	2	1	2	2	1	1	2	2	1	1	1	2	2	2	1	2
238	1A	IWB77870	58.7739		2	1	2	2	1	1	1	1	1	2	1	1	2	1	2	2	1	1	2	1	2	2	2	2	2	2	2	1	2	2	1	3	2	1	1	2	2	1	1	1	2	2	2	1	2
239	1A	IWB80448	58.7739		2	1	2	2	1	1	1	1	1	2	1	1	2	1	2	2	1	1	2	1	2	2	2	2	2	2	2	1	2	2	1	2	2	1	1	2	2	1	1	1	2	2	2	1	2
240	1A	IWB56828	58.7739		2	1	2	2	1	1	1	1	1	2	1	1	2	1	2	2	1	1	2	1	2	2	2	2	2	2	2	1	2	2	1	2	2	1	1	2	2	1	1	1	2	2	2	1	2
241	1A	IWB49169	58.7739		2	1	2	2	1	1	1	1	1	2	1	1	2	1	2	2	1	1	2	1	2	2	2	2	2	2	2	1	2	2	1	2	2	1	1	2	2	1	1	1	2	2	2	1	2
242	1A	IWB77871	58.7739		2	1	2	2	1	1	1	1	1	2	1	1	2	1	2	2	1	1	2	1	2	2	2	2	2	2	2	1	2	2	1	2	2	1	1	2	2	1	1	1	2	2	2	1	2
243	1A	IWB60215	58.7739		2	1	2	2	1	1	1	1	1	2	1	1	2	1	2	2	1	1	2	1	2	2	2	2	2	2	2	1	2	2	1	2	2	1	1	2	2	1	1	1	2	2	2	1	2
244	1A	IWB3507	58.7739		2	1	2	2	1	1	1	1	1	2	1	1	2	1	2	2	1	1	2	1	2	2	2	2	2	2	2	1	2	2	1	2	2	1	1	2	2	1	1	1	2	2	2	1	2
245	1A	IWB81337	58.7739		2	1	2	2	1	1	1	1	1	2	1	1	2	1	2	2	1	1	2	1	2	2	2	2	2	2	2	1	2	2	1	2	2	1	1	2	2	1	1	1	2	2	2	1	2
246	1A	IWB78902	58.7739		2	1	2	2	1	1	1	1	1	2	1	1	2	1	2	2	1	1	2	1	2	2	2	2	2	2	2	1	2	2	1	2	2	1	1	2	2	1	1	1	2	2	2	1	2
247	1A	IWB31690	58.7739		2	1	2	2	1	1	1	1	1	2	1	1	2	1	2	2	1	1	2	1	2	2	2	2	2	2	2	1	2	2	1	2	2	1	1	2	2	1	1	1	2	2	2	1	2
248	1A	IWB13491	58.7739		2	1	2	2	1	1	1	1	1	2	1	1	2	1	2	2	1	1	2	1	2	2	2	2	2	2	2	1	2	2	1	2	2	1	1	2	2	1	1	1	2	2	2	1	2
249	1A	IWB77186	58.7739		2	1	2	2	1	1	1	1	1	2	1	1	2	1	2	2	1	1	2	1	2	2	2	2	2	2	2	1	2	2	1	2	2	1	1	2	2	1	1	1	2	2	2	1	2
250	1A	IWB76557	58.7739		2	1	2	2	1	1	1	1	1	2	1	1	2	1	2	2	1	1	2	1	2	2	2	2	2	2	2	1	2	2	1	2	2	1	1	2	2	1	1	1	2	2	2	1	2
251	1A	IWB76400	58.7739		2	1	2	2	1	1	1	1	1	2	1	1	2	1	2	2	1	1	2	1	2	2	2	2	2	2	2	1	2	2	1	2	2	1	1	2	2	1	1	1	2	2	2	1	2
252	1A	IWB64861	58.7739		2	1	2	2	1	1	1	1	1	2	1	1	2	1	2	2	1	1	2	1	2	2	2	2	2	2	2	1	2	2	1	2	2	1	1	2	2	1	1	1	2	2	2	1	2
253	1A	IWB53086	58.7739		2	1	2	2	1	1	1	1	1	2	1	1	2	1	2	2	1	1	2	1	2	2	2	2	2	2	2	1	2	2	1	2	2	1	1	2	2	1	1	1	2	2	2	1	2
254	1A	IWB48847	59.0022		2	1	2	2	1	1	1	1	1	2	1	1	2	1	2	2	1	1	2	1	2	2	2	2	2	2	2	1	2	2	1	2	2	1	1	2	2	1	1	1	2	2	2	1	2
255	1A	IWB709	59.0022		2	1	2	2	1	1	1	1	1	2	1	1	2	1	2	2	1	1	2	1	2	2	2	2	2	2	2	1	2	2	1	3	2	1	1	2	2	1	1	1	2	2	2	1	2
256	1A	IWB14647	59.0022		2	1	2	2	1	1	1	1	1	2	1	1	2	1	2	2	1	1	2	1	2	2	2	2	2	2	2	1	2	2	1	3	2	1	1	2	2	1	1	1	2	2	2	1	2
257	1A	IWB60796	59.0022		2	1	2	2	1	1	1	1	1	2	1	1	2	1	2	2	1	1	2	1	2	2	2	2	2	2	2	1	2	2	1	2	2	1	1	2	2	1	1	1	2	2	2	1	2
258	1A	IWB30530	59.0022		2	1	2	2	1	1	1	1	1	2	1	1	2	1	2	2	1	1	2	1	2	2	2	2	2	2	2	1	2	2	1	2	2	1	1	2	2	1	1	1	2	2	2	1	2
259	1A	IWB15064	59.0022		2	1	2	2	1	1	1	1	1	2	1	1	2	1	2	2	1	1	2	1	2	2	2	2	2	2	2	1	2	2	1	2	2	1	1	2	2	1	1	1	2	2	2	1	2
260	1A	IWB66886	59.0022		2	1	2	2	1	1	1	1	1	2	1	1	2	1	2	2	1	1	2	1	2	2	2	2	2	2	2	1	2	2	1	2	2	1	1	2	2	1	1	1	2	2	2	1	2
261	1A	IWB50882	59.0022		2	1	2	2	1	1	1	1	1	2	1	1	2	1	2	2	1	1	2	1	2	2	2	2	2	2	2	1	2	2	1	2	2	1	1	2	2	1	1	1	2	2	2	1	2
262	1A	IWB75678	59.0022		2	1	2	2	1	1	1	1	1	2	1	1	2	1	2	2	1	1	2	1	2	2	2	2	2	2	2	1	2	2	1	2	2	1	1	2	2	1	1	1	2	2	2	1	2
263	1A	IWB27889	59.0022		2	1	2	2	1	1	1	1	1	2	1	1	2	1	2	2	1	1	2	1	2	2	2	2	2	2	2	1	2	2	1	2	2	1	1	2	2	1	1	1	2	2	2	1	2
264	1A	IWB31652	59.0022		2	1	2	2	1	1	1	1	1	2	1	1	2	1	2	2	1	1	2	1	2	2	2	2	2	2	2	1	2	2	1	2	2	1	1	2	2	1	1	1	2	2	2	1	2
265	1A	IWB77566	59.0022		2	1	2	2	1	1	1	1	1	2	1	1	2	1	2	2	1	1	2	1	2	2	2	2	2	2	2	1	2	2	1	2	2	1	1	2	2	1	1	1	2	2	2	1	2
266	1A	IWB57405	59.0022		2	1	2	2	1	1	1	1	1	2	1	1	2	1	2	2	1	1	2	1	2	2	2	2	2	2	2	1	2	2	1	2	2	1	1	2	2	1	1	1	2	2	2	1	2
267	1A	IWB79036	59.2305		2	1	2	2	1	1	1	1	1	2	1	1	2	1	2	2	1	1	2	1	2	2	2	2	2	2	2	1	2	2	1	2	2	1	1	2	2	1	1	1	2	2	2	1	2
268	1A	IWB12984	59.2305		2	1	2	2	1	1	1	1	1	2	1	1	2	1	2	2	1	1	2	1	2	2	2	2	2	2	2	1	2	2	1	2	2	1	1	2	2	1	1	1	2	2	2	1	2
269	1A	IWB48626	59.2305		2	1	2	2	1	1	1	1	1	2	1	1	2	1	2	2	1	1	2	1	2	2	2	2	2	2	2	1	2	2	1	2	2	1	1	2	2	1	1	1	2	2	2	1	2
270	1A	IWB57546	59.2305		2	1	2	2	1	1	1	1	1	2	1	1	2	1	2	2	1	1	2	1	2	2	2	2	2	2	2	1	2	2	1	2	2	1	1	2	2	1	1	1	2	2	2	1	2
271	1A	IWB81214	59.2305		2	1	2	2	1	1	1	1	1	2	1	1	2	1	2	2	1	1	2	1	2	2	2	2	2	2	2	1	2	2	1	2	2	1	1	2	2	1	1	1	2	2	2	1	2
272	1A	IWB57547	59.2305		2	1	2	2	1	1	1	1	1	2	1	1	2	1	2	2	1	1	2	1	2	2	2	2	2	2	2	1	2	2	1	2	2	1	1	2	2	1	1	1	2	2	2	1	2
273	1A	IWB45811	59.2305		2	1	2	2	1	1	1	1	1	2	1	1	2	1	2	2	1	1	2	1	2	2	2	2	2	2	2	1	2	2	1	2	2	1	1	2	2	1	1	1	2	2	2	1	2
274	1A	IWB15302	59.2305		2	1	2	2	1	1	1	1	1	2	1	1	2	1	2	2	1	1	2	1	2	2	2	2	2	2	2	1	2	2	1	2	2	1	1	2	2	1	1	1	2	2	2	1	2
275	1A	IWB57483	59.4588		2	1	2	2	1	1	1	1	1	2	1	1	2	1	2	2	1	1	2	1	2	2	2	2	2	2	2	1	2	2	1	2	2	1	1	2	2	1	1	1	2	2	2	1	2
276	1A	IWB77972	59.4588		2	1	2	2	1	1	1	1	1	2	1	1	2	1	2	2	1	1	2	1	2	2	2	2	2	2	2	1	2	2	1	2	2	1	1	2	2	1	1	1	2	2	2	1	2
277	1A	IWB14005	59.4588		2	1	2	2	1	1	1	1	1	2	1	1	2	1	2	2	1	1	2	1	2	2	2	2	2	2	2	1	2	2	1	2	2	1	1	2	2	1	1	1	2	2	2	1	2
278	1A	IWB71889	59.4588		2	1	2	2	1	1	1	1	1	2	1	1	2	1	2	2	1	1	2	1	2	2	2	2	2	2	2	1	2	2	1	2	2	1	1	2	2	1	1	1	2	2	2	1	2
279	1A	IWB78197	59.4588		2	1	2	2	1	1	1	1	1	2	1	1	2	1	2	2	1	1	2	1	2	2	2	2	2	2	2	1	2	2	1	2	2	1	1	2	2	1	1	1	2	2	2	1	2
280	1A	IWB76931	59.4588		2	1	2	2	1	1	1	1	1	2	1	1	2	1	2	2	1	1	2	1	2	2	2	2	2	2	2	1	2	2	1	2	2	1	1	2	2	1	1	1	2	2	2	1	2
281	1A	IWB11190	59.4588		2	1	2	2	1	1	1	1	1	2	1	1	2	1	2	2	1	1	2	1	2	2	2	2	2	2	2	1	2	2	1	2	2	1	1	2	2	1	1	1	2	2	2	1	2
282	1A	IWB75672	59.4588		2	1	2	2	1	1	1	1	1	2	1	1	2	1	2	2	1	1	2	1	2	2	2	2	2	2	2	1	2	2	1	2	2	1	1	2	2	1	1	1	2	2	2	1	2
283	1A	IWB6779	59.4588		2	1	2	2	1	1	1	1	1	2	1	1	2	1	2	2	1	1	2	1	2	2	2	2	2	2	2	1	2	2	1	2	2	1	1	2	2	1	1	1	2	2	2	1	2
284	1A	IWB78076	59.4588		2	1	2	2	1	1	1	1	1	2	1	1	2	1	2	2	1	1	2	1	2	2	2	2	2	2	2	1	2	2	1	2	2	1	1	2	2	1	1	1	2	2	2	1	2
285	1A	IWB24291	59.4588		2	1	2	2	1	1	1	1	1	2	1	1	2	1	2	2	1	1	2	1	2	2	2	2	2	2	2	1	2	2	1	2	2	1	1	2	2	1	1	1	2	2	2	1	2
286	1A	IWB79021	59.4588		2	1	2	2	1	1	1	1	1	2	1	1	2	1	2	2	1	1	2	1	2	2	2	2	2	2	2	1	2	2	1	2	2	1	1	2	2	1	1	1	2	2	2	1	2
287	1A	IWB78198	59.4588		2	1	2	2	1	1	1	1	1	2	1	1	2	1	2	2	1	1	2	1	2	2	2	2	2	2	2	1	2	2	1	3	2	1	1	2	2	1	1	1	2	2	2	1	2
288	1A	IWB27064	59.4588		2	1	2	2	1	1	1	1	1	2	1	1	2	1	2	2	1	1	2	1	2	2	2	2	2	2	2	1	2	2	1	3	2	1	1	2	2	1	1	1	2	2	2	1	2
289	1A	IWB35364	59.4588		2	1	2	2	1	1	1	1	1	2	1	1	2	1	2	2	1	1	2	1	2	2	2	2	2	2	2	1	2	2	1	2	2	1	1	2	2	1	1	1	2	2	2	1	2
290	1A	IWB57290	59.4588		2	1	2	2	1	1	1	1	1	2	1	1	2	1	2	2	1	1	2	1	2	2	2	2	2	2	2	1	2	2	1	2	2	1	1	2	2	1	1	1	2	2	2	1	2
291	1A	IWB72418	59.4588		2	1	2	2	1	1	1	1	1	2	1	1	2	1	2	2	1	1	2	1	2	2	2	2	2	2	2	1	2	2	1	2	2	1	1	2	2	1	1	1	2	2	2	1	2
292	1A	IWB47404	59.4588		2	1	2	2	1	1	1	1	1	2	1	1	2	1	2	2	1	1	2	1	2	2	2	2	2	2	2	1	2	2	1	2	2	1	1	2	2	1	1	1	2	2	2	1	2
293	1A	IWB79022	59.4588		2	1	2	2	1	1	1	1	1	2	1	1	2	1	2	2	1	1	2	1	2	2	2	2	2	2	2	1	2	2	1	2	2	1	1	2	2	1	1	1	2	2	2	1	2
294	1A	IWB78199	59.4588		2	1	2	2	1	1	1	1	1	2	1	1	2	1	2	2	1	1	2	1	2	2	2	2	2	2	2	1	2	2	1	2	2	1	1	2	2	1	1	1	2	2	2	1	2
295	1A	IWB14772	59.4588		2	1	2	2	1	1	1	1	1	2	1	1	2	1	2	2	1	1	2	1	2	2	2	2	2	2	2	1	2	2	1	2	2	1	1	2	2	1	1	1	2	2	2	1	2
296	1A	IWB79509	60.163		2	1	2	2	1	1	1	1	1	2	1	1	2	1	2	2	1	1	2	1	2	2	2	2	2	2	2	1	2	2	1	3	2	1	1	2	2	1	1	1	2	2	2	1	2
297	1A	IWB46432	60.163		2	1	2	2	1	1	1	1	1	2	1	1	2	1	2	2	1	1	2	1	2	2	2	2	2	2	2	1	2	2	1	3	2	1	1	2	2	1	1	1	2	2	2	1	2
298	1A	IWB31781	60.864		2	1	2	2	1	1	1	1	1	2	1	1	2	1	2	2	1	1	2	1	2	2	2	2	2	2	2	1	2	1	1	2	2	1	1	2	2	1	1	1	2	2	2	1	2
299	1A	IWB3707	60.864		2	1	2	2	1	1	1	1	1	2	1	1	2	1	2	2	1	1	2	1	2	2	2	2	2	2	2	1	2	1	1	2	2	1	1	2	2	1	1	1	2	2	2	1	2
300	1A	IWB31924	60.864		2	1	2	2	1	1	1	1	1	2	1	1	2	1	2	2	1	1	2	1	2	2	2	2	2	2	2	1	2	1	1	2	2	1	1	2	2	1	1	1	2	2	2	1	2
301	1A	IWB28355	60.864		2	1	2	2	1	1	1	1	1	2	1	1	2	1	2	2	1	1	2	1	2	2	2	2	2	2	2	1	2	1	1	2	2	1	1	2	2	1	1	1	2	2	2	1	2
302	1A	IWB72825	60.864		2	1	2	2	1	1	1	1	1	2	1	1	2	1	2	2	1	1	2	1	2	2	2	2	2	2	2	1	2	1	1	2	2	1	1	2	2	1	1	1	2	2	2	1	2
303	1A	IWB62522	60.864		2	1	2	2	1	1	1	1	1	2	1	1	2	1	2	2	1	1	2	1	2	2	2	2	2	2	2	1	2	1	1	2	2	1	1	2	2	1	1	1	2	2	2	1	2
304	1A	IWB61236	61.0944		2	1	2	2	1	1	1	1	1	2	1	1	2	1	2	2	1	1	2	1	2	2	2	2	2	2	2	1	2	1	1	2	2	1	1	2	2	1	1	1	2	2	2	1	2
305	1A	IWB66378	61.0944		2	1	2	2	1	1	1	1	1	2	1	1	2	1	2	2	1	1	2	1	2	2	2	2	2	2	2	1	2	1	1	2	2	1	1	2	2	1	1	1	2	2	2	1	2
306	1A	IWB31350	61.0944		2	1	2	2	1	1	1	1	1	2	1	1	2	1	2	2	1	1	2	1	2	2	2	2	2	2	2	1	2	1	1	3	2	1	1	2	2	1	1	1	2	2	2	1	2
307	1A	IWB61264	61.0944		2	1	2	2	1	1	1	1	1	2	1	1	2	1	2	2	1	1	2	1	2	2	2	2	2	2	2	1	2	1	1	2	2	1	1	2	2	1	1	1	2	2	2	1	2
308	1A	IWB50545	61.0944		2	1	2	2	1	1	1	1	1	2	1	1	2	1	2	2	1	1	2	1	2	2	2	2	2	2	2	1	2	1	1	2	2	1	1	2	2	1	1	1	2	2	2	1	2
309	1A	IWB22535	62.991		2	1	2	2	1	1	1	1	1	2	1	1	2	1	1	2	1	1	2	1	2	2	2	2	2	2	2	1	1	1	1	2	2	1	1	2	2	1	1	1	2	2	2	1	2
310	1A	IWB64464	62.991		2	1	2	2	1	1	1	1	1	2	1	1	2	1	1	2	1	1	2	1	2	2	2	2	2	2	2	1	1	1	1	2	2	1	1	2	2	1	1	1	2	2	2	1	2
311	1A	IWB74073	63.454		2	1	2	2	1	1	1	1	1	2	1	1	2	1	1	2	1	1	2	1	2	2	2	2	2	2	2	1	1	1	1	2	2	1	1	2	2	1	1	1	2	2	2	1	2
312	1A	IWB77285	63.454		2	1	2	2	1	1	1	1	1	2	1	1	2	1	1	2	1	1	2	1	2	2	2	2	2	2	2	1	1	1	1	2	2	1	1	2	2	1	1	1	2	2	2	1	2
313	1A	IWB73807	63.454		2	1	2	2	1	1	1	1	1	2	1	1	2	1	1	2	1	1	2	1	2	2	2	2	2	2	2	1	1	1	1	2	2	1	1	2	2	1	1	1	2	2	2	1	2
314	1A	IWB71397	63.454		2	1	2	2	1	1	1	1	1	2	1	1	2	1	1	2	1	1	2	1	2	2	2	2	2	2	2	1	1	1	1	2	2	1	1	2	2	1	1	1	2	2	2	1	2
315	1A	IWB20306	63.6844		2	1	2	2	1	1	1	1	1	2	1	1	2	1	1	2	1	1	2	1	2	2	2	2	2	2	2	1	1	1	1	2	2	1	1	2	2	1	1	1	2	2	2	1	2
316	1A	IWB20671	63.6844		2	1	2	2	1	1	1	1	1	2	1	1	2	1	1	2	1	1	2	1	2	2	2	2	2	2	2	1	1	1	1	2	2	1	1	2	2	1	1	1	2	2	2	1	2
317	1A	IWB19845	63.6844		2	1	2	2	1	1	1	1	1	2	1	1	2	1	1	2	1	1	2	1	2	2	2	2	2	2	2	1	1	1	1	2	2	1	1	2	2	1	1	1	2	2	2	1	2
318	1A	IWB60037	63.6844		2	1	2	2	1	1	1	1	1	2	1	1	2	1	1	2	1	1	2	1	2	2	2	2	2	2	2	1	1	1	1	2	2	1	1	2	2	1	1	1	2	2	2	1	2
319	1A	IWB38877	63.6844		2	1	2	2	1	1	1	1	1	2	1	1	2	1	1	2	1	1	2	1	2	2	2	2	2	2	2	1	1	1	1	2	2	1	1	2	2	1	1	1	2	2	2	1	2
320	1A	IWB35117	63.6844		2	1	2	2	1	1	1	1	1	2	1	1	2	1	1	2	1	1	2	1	2	2	2	2	2	2	2	1	1	1	1	2	2	1	1	2	2	1	1	1	2	2	2	1	2
321	1A	IWB52241	63.6844		2	1	2	2	1	1	1	1	1	2	1	1	2	1	1	2	1	1	2	1	2	2	2	2	2	2	2	1	1	1	1	3	2	1	1	2	2	1	1	1	2	2	2	1	2
322	1A	IWB61373	63.6844		2	1	2	2	1	1	1	1	1	2	1	1	2	1	1	2	1	1	3	1	2	2	2	2	2	2	2	1	1	1	1	2	2	1	1	2	2	1	1	1	2	2	2	1	2
323	1A	IWB72053	63.6844		2	1	2	2	1	1	1	1	1	2	1	1	2	1	1	2	1	1	2	1	2	2	2	2	2	2	2	1	1	1	1	2	2	1	1	2	2	1	1	1	2	2	2	1	2
324	1A	IWB20307	63.6844		2	1	2	2	1	1	1	1	1	2	1	1	2	1	1	2	1	1	2	1	2	2	2	2	2	2	2	1	1	1	1	2	2	1	1	2	2	1	1	1	2	2	2	1	2
325	1A	IWB72019	64.3887		2	1	2	2	1	1	1	1	1	2	1	1	2	1	1	2	1	1	2	1	2	2	2	2	2	2	2	1	1	1	1	2	2	1	1	2	2	1	1	1	2	2	2	1	1
326	1A	IWB34823	66.5534		2	1	2	2	1	1	1	1	1	2	1	1	2	1	1	2	1	1	2	1	2	2	2	2	1	2	2	1	1	1	1	2	2	1	1	2	2	1	1	1	2	2	2	1	1
327	1A	IWB35927	73.6314		2	1	2	2	1	1	1	1	2	2	1	1	2	2	1	2	1	1	1	1	2	2	2	2	1	2	2	1	1	1	1	2	2	1	1	2	2	1	1	1	2	2	2	1	1
328	1A	IWB21382	73.6314		2	1	2	2	1	1	1	1	2	2	1	1	2	2	1	2	1	1	1	1	2	2	2	2	1	2	2	1	1	1	1	2	2	1	1	2	2	1	1	1	2	2	2	1	1
329	1A	IWB40349	73.6314		2	1	2	2	1	1	1	1	2	2	1	1	2	2	1	2	1	1	1	1	2	2	2	2	1	2	2	1	1	1	1	2	2	1	1	2	2	1	1	1	2	2	2	1	1
330	1A	IWB34506	73.8607		2	1	2	2	1	1	1	1	2	2	1	1	2	2	1	2	1	1	1	1	2	2	2	2	1	2	2	1	1	1	1	2	2	1	1	2	2	1	1	1	2	2	2	1	1
331	1A	IWB80597	74.0933		2	1	2	2	1	1	1	1	2	2	1	1	2	2	1	2	1	1	1	1	2	2	2	2	1	2	2	1	1	1	1	2	2	1	1	2	2	1	1	1	2	2	2	1	1
332	1A	IWB77447	74.0933		2	1	2	2	1	1	1	1	2	2	1	1	2	2	1	2	1	1	1	1	2	2	2	2	1	2	2	1	1	1	1	2	2	1	1	2	2	1	1	1	2	2	2	1	1
333	1A	IWB79590	74.3216		2	1	2	2	1	1	1	1	2	2	1	1	2	2	1	2	1	1	1	1	2	2	2	2	1	2	2	1	1	1	1	2	2	1	1	2	2	1	1	1	2	2	2	1	1
334	1A	IWB55805	75.7238		2	1	2	2	1	1	1	1	2	2	1	1	2	2	1	2	1	1	1	1	2	2	2	2	1	2	2	1	1	1	1	2	2	1	1	2	2	1	2	1	2	2	2	1	1
335	1A	IWB43491	76.8922		2	1	2	2	1	1	1	1	2	2	1	1	2	2	1	2	1	1	1	1	2	2	2	2	1	2	2	1	1	1	1	2	2	3	1	2	2	1	2	1	2	2	2	1	1
336	1A	IWB79556	76.8922		2	1	2	2	1	1	1	1	2	2	1	1	2	2	1	2	1	1	1	1	2	2	2	2	1	2	2	1	1	1	1	3	2	1	1	2	2	1	2	1	2	2	2	1	1
337	1A	IWB58903	76.8922		2	1	2	2	1	1	1	1	2	2	1	1	2	2	1	2	1	1	1	1	2	2	2	2	1	2	2	1	1	1	1	2	2	1	1	2	2	1	2	1	2	2	2	1	1
338	1A	IWB8255	77.3552		2	1	2	2	1	1	1	1	2	2	1	1	2	2	1	2	1	1	1	1	2	2	2	2	1	2	2	1	1	1	1	2	2	1	1	2	2	1	2	1	2	2	2	1	2
339	1A	IWB10042	77.3552		2	1	2	2	1	1	1	1	2	2	1	1	2	2	1	2	1	1	1	1	2	2	2	2	1	2	2	1	1	1	1	3	2	1	1	2	2	1	2	1	2	2	2	1	2
340	1A	IWB6783	77.3552		2	1	2	2	1	1	1	1	2	2	1	1	2	2	1	2	1	1	1	1	2	2	2	2	1	2	2	1	1	1	1	3	2	1	1	2	2	1	2	1	2	2	2	1	2
341	1A	IWB30576	77.3552		2	1	2	2	1	1	1	1	2	2	1	1	2	2	1	2	1	1	1	1	2	2	2	2	1	2	2	1	1	1	1	2	2	1	1	2	2	1	2	1	2	2	2	1	2
342	1A	IWB78371	77.3552		2	1	2	2	1	1	1	1	2	2	1	1	2	2	1	2	1	1	1	1	2	2	2	2	1	2	2	1	1	1	1	2	2	1	1	2	2	1	2	1	2	2	2	1	2
343	1A	IWB79658	77.3552		2	1	2	2	1	1	1	1	2	2	1	1	2	2	1	2	1	1	1	1	2	2	2	2	1	2	2	1	1	1	1	2	2	1	1	2	2	1	2	1	2	2	2	1	2
344	1A	IWB70213	77.5835		2	1	2	2	1	1	1	1	2	2	1	1	2	2	1	2	1	1	1	1	2	2	2	2	1	2	2	1	1	1	1	2	2	1	1	2	2	1	2	1	2	2	2	1	2
345	1A	IWB11516	77.5835		2	1	2	2	1	1	1	1	2	2	1	1	2	2	1	2	1	1	1	1	2	2	2	2	1	2	2	1	1	1	1	2	2	1	1	2	2	1	2	1	2	2	2	1	2
346	1A	IWB38496	77.5835		2	1	2	2	1	1	1	1	2	2	1	1	2	2	1	2	1	1	1	1	2	2	2	2	1	2	2	1	1	1	1	2	2	1	1	2	2	1	2	1	2	2	2	1	2
347	1A	IWB35691	79.7379		2	1	2	2	1	1	1	1	2	2	1	1	2	2	1	2	1	1	1	1	2	2	2	2	1	2	2	1	1	1	1	2	2	1	1	1	2	1	2	1	2	2	2	1	2
348	1A	IWB6733	79.9683		2	1	1	2	1	1	1	1	2	2	1	1	2	2	1	2	1	1	1	1	2	2	2	2	1	2	2	1	1	1	1	2	2	1	1	1	2	1	2	1	2	2	2	1	2
349	1A	IWB52047	79.9683		2	1	1	2	1	1	1	1	2	2	1	1	2	2	1	2	1	1	1	1	2	2	2	2	1	2	2	1	1	1	1	2	2	1	1	1	2	1	2	1	2	2	2	1	2
350	1A	IWB77156	80.1976		2	1	2	2	1	1	1	1	2	2	1	1	2	2	1	2	1	1	1	1	2	2	2	2	1	2	2	1	1	1	1	2	2	1	1	1	2	1	2	1	2	2	2	1	2
351	1A	IWB380	80.1976		2	1	2	2	1	1	1	1	2	2	1	1	2	2	1	2	1	1	1	1	2	2	2	2	1	2	2	1	1	1	1	2	2	1	1	1	2	1	2	1	2	2	2	1	2
352	1A	IWB25487	80.1976		2	1	2	2	1	1	1	1	2	2	1	1	2	2	1	2	1	1	1	1	2	2	2	2	1	2	2	1	1	1	1	2	2	1	1	1	2	1	2	1	2	2	2	1	2
353	1A	IWB77165	80.1976		2	1	2	2	1	1	1	1	2	2	1	1	2	2	1	2	1	1	1	1	2	2	2	2	1	2	2	1	1	1	1	2	2	1	1	1	2	1	2	1	2	2	2	1	2
354	1A	IWB55442	80.1976		2	1	2	2	1	1	1	1	2	2	1	1	2	2	1	2	1	1	1	1	2	2	2	2	1	2	2	1	1	1	1	2	2	1	1	1	2	1	2	1	2	2	2	1	2
355	1A	IWB31863	80.1976		2	1	2	2	1	1	1	1	2	2	1	1	2	2	1	2	1	1	1	1	2	2	2	2	1	2	2	1	1	1	1	2	2	1	1	1	2	1	2	1	2	2	2	1	2
356	1A	IWB43096	80.1976		2	1	2	2	1	1	1	1	2	2	1	1	2	2	1	2	1	1	1	1	2	2	2	2	1	2	2	1	1	1	1	2	2	1	1	1	2	1	2	1	2	2	2	1	2
357	1A	IWB20652	80.6606		2	1	2	2	1	1	1	1	2	2	1	1	2	2	1	2	1	1	1	1	2	2	2	2	1	2	2	1	1	1	1	2	2	1	1	1	2	1	2	1	2	2	2	1	2
358	1A	IWB52651	80.6606		2	1	2	2	1	1	1	1	2	2	1	1	2	2	1	2	1	1	1	1	2	2	2	2	1	2	2	1	1	1	1	2	2	1	1	1	2	1	2	1	2	2	2	1	2
359	1A	IWB52858	80.6606		2	1	2	2	1	1	1	1	2	2	1	1	2	2	1	2	1	1	1	1	2	2	2	2	1	2	2	1	1	1	1	2	2	1	1	1	2	1	2	1	2	2	2	1	2
360	1A	IWB79125	80.6606		2	1	2	2	1	1	1	1	2	2	1	1	2	2	1	2	1	1	1	1	2	2	2	2	1	2	2	1	1	1	1	2	2	1	1	1	2	1	2	1	2	2	2	1	2
361	1A	IWB35473	80.6606		2	1	2	2	1	1	1	1	2	2	1	1	2	2	1	2	1	1	1	1	2	2	2	2	1	2	2	1	1	1	1	2	2	1	1	1	2	1	2	1	2	2	2	1	2
362	1A	IWB54862	80.6606		2	1	2	2	1	1	1	1	2	2	1	1	2	2	1	2	1	1	1	1	2	2	2	2	1	2	2	1	1	1	1	2	2	1	1	1	2	1	2	1	2	2	2	1	2
363	1A	IWB77009	81.3583		2	1	2	2	1	1	1	1	2	2	1	1	2	2	1	2	1	1	1	1	2	2	2	2	1	2	2	1	1	1	1	2	2	1	1	1	2	1	2	1	2	2	2	1	2
364	1A	IWB11628	83.0256		2	1	2	2	1	1	1	1	2	2	1	1	2	2	1	2	1	1	1	1	2	2	2	2	1	2	3	1	1	1	1	2	2	1	1	1	2	1	2	1	2	2	2	1	2
365	1A	IWB6769	83.0256		2	1	2	2	1	1	1	1	2	2	1	1	2	2	1	2	1	1	1	1	2	2	2	2	1	2	3	1	1	1	1	2	2	1	1	1	2	1	2	1	2	2	2	1	2
366	1A	IWB50788	83.0256		2	1	2	2	1	1	1	1	2	2	1	1	2	2	1	2	1	1	1	1	2	2	2	2	1	2	3	1	1	1	1	3	2	1	1	1	2	1	2	1	2	2	2	1	2
367	1A	IWB70352	83.0256		2	1	2	2	1	1	1	1	2	2	1	1	2	2	1	2	1	1	1	1	2	2	2	2	1	2	3	1	1	1	1	3	2	1	1	1	2	1	2	1	2	2	2	1	2
368	1A	IWB78448	83.0256		2	1	2	2	1	1	1	1	2	2	1	1	2	2	1	2	1	1	1	1	2	2	2	2	1	2	3	1	1	1	1	2	2	1	1	1	2	1	2	1	2	2	2	1	2
369	1A	IWB79156	83.978		2	1	2	2	1	1	1	1	2	2	1	1	2	2	1	2	1	1	1	1	2	2	2	2	1	2	3	1	1	1	1	2	2	1	1	1	2	1	2	1	2	2	2	1	2
370	1A	IWB11883	86.4189		2	1	2	2	1	1	1	1	2	2	1	1	2	2	1	2	1	1	1	1	2	2	2	2	1	2	3	1	1	1	1	2	2	1	1	1	2	1	2	1	2	2	2	1	2
371	1A	IWB56353	86.6493		2	1	2	2	1	1	1	1	2	2	1	1	2	2	1	2	1	1	1	1	2	2	2	2	1	2	3	1	1	1	1	2	2	1	1	1	2	1	2	1	2	2	2	1	2
372	1A	IWB80125	86.6493		2	1	2	2	1	1	1	1	2	2	1	1	2	2	1	2	1	1	1	1	2	2	2	2	1	2	3	1	1	1	1	2	2	1	1	1	2	1	2	1	2	2	2	1	2
373	1A	IWB56355	86.6493		2	1	2	2	1	1	1	1	2	2	1	1	2	2	1	2	1	1	1	1	2	2	2	2	1	2	3	1	1	1	1	3	2	1	1	1	2	1	2	1	2	2	2	1	2
374	1A	IWB79151	86.6493		2	1	2	2	1	1	1	3	2	2	1	1	2	2	1	2	1	1	1	1	2	2	2	2	1	2	3	1	1	1	1	3	2	1	1	1	2	1	2	1	2	2	2	1	2
375	1A	IWB7079	86.6493		2	1	2	2	1	1	1	1	2	2	1	1	2	2	1	2	1	1	1	1	2	2	2	2	1	2	3	1	1	1	1	2	2	1	1	1	2	1	2	1	2	2	2	1	2
376	1A	IWB77836	87.8232		2	1	2	2	1	1	1	1	2	2	1	1	2	2	1	2	1	1	1	1	2	2	2	2	1	2	3	1	1	1	1	2	2	1	1	1	2	1	2	1	2	2	2	1	2
377	1A	IWB49095	87.8232		2	1	2	2	1	1	1	1	2	2	1	1	2	2	1	2	1	1	1	1	2	2	2	2	1	2	3	1	1	1	1	2	2	1	1	1	2	1	2	1	2	2	2	1	2
378	1A	IWB45341	87.8232		2	1	2	2	1	1	1	1	2	2	1	1	2	2	1	2	1	1	1	1	2	2	2	2	1	2	3	1	1	1	1	2	2	1	1	1	2	1	2	1	2	2	2	1	2
379	1A	IWB79996	87.8232		2	1	2	2	1	1	1	1	2	2	1	1	2	2	1	2	1	1	1	1	2	2	2	2	1	2	3	1	1	1	1	3	2	1	1	1	2	1	2	1	2	2	2	1	2
380	1A	IWB46385	87.8232		2	1	2	2	1	1	1	1	2	2	1	1	2	2	1	2	1	1	1	1	2	2	2	2	1	2	3	1	1	1	1	3	2	1	1	1	2	1	2	1	2	2	2	1	2
381	1A	IWB34701	87.8232		2	1	3	2	1	1	1	1	2	2	1	1	2	2	1	2	1	1	1	1	2	2	2	2	1	2	3	1	1	1	1	2	2	1	1	1	2	1	2	1	2	2	2	1	2
382	1A	IWB40889	87.8232		2	1	2	2	1	1	1	1	2	2	1	1	2	2	1	2	1	1	1	1	2	2	2	2	1	2	3	1	1	1	1	2	2	1	1	1	2	1	2	1	2	2	2	1	2
383	1A	IWB80156	87.8232		2	1	2	2	1	1	1	1	2	2	1	1	2	2	1	2	1	1	1	1	2	2	2	2	1	2	3	1	1	1	1	2	2	1	1	1	2	1	2	1	2	2	2	1	2
384	1A	IWB43647	87.8232		2	1	2	2	1	1	1	1	2	2	1	1	2	2	1	2	1	1	1	1	2	2	2	2	1	2	3	1	1	1	1	2	2	1	1	1	2	1	2	1	2	2	2	1	2
385	1A	IWB9588	87.8232		2	1	2	2	1	1	1	1	2	2	1	1	2	2	1	2	1	1	1	1	2	2	2	2	1	2	3	1	1	1	1	2	2	1	1	1	2	1	2	1	2	2	2	1	2
386	1A	IWB56065	87.8232		2	1	2	2	1	1	1	1	2	2	1	1	2	2	1	2	1	1	1	1	2	2	2	2	1	2	3	1	1	1	1	2	2	1	1	1	2	1	2	1	2	2	2	1	2
387	1A	IWB58517	87.8232		2	1	2	2	1	1	1	1	2	2	1	1	2	2	1	2	1	1	1	1	2	2	2	2	1	2	3	1	1	1	1	2	2	1	1	1	2	1	2	1	2	2	2	1	2
388	1A	IWB75965	87.8232		2	1	2	2	1	1	1	1	2	2	1	1	2	2	1	2	1	1	1	1	2	2	2	2	1	2	3	1	1	1	1	2	2	1	1	1	2	1	2	1	2	2	2	1	2
389	1A	IWB6974	88.5242		2	1	2	2	1	1	1	1	2	2	1	1	2	2	1	2	1	1	1	1	2	2	2	2	1	2	3	1	1	1	1	2	2	2	1	1	2	1	2	1	2	2	2	1	2
390	1A	IWB11087	88.5242		2	1	2	2	1	1	1	1	2	2	1	1	2	2	1	2	1	1	1	1	2	2	2	2	1	2	3	1	1	1	1	3	2	2	1	1	2	1	2	1	2	2	2	1	2
391	1A	IWB6944	88.5242		2	1	2	2	1	1	1	1	2	2	1	1	2	2	1	2	1	1	1	1	2	2	2	2	1	2	3	1	1	1	1	2	2	2	1	1	2	1	2	1	2	2	2	1	2
392	1A	IWB11708	88.5242		2	1	2	2	1	1	1	1	2	2	1	1	2	2	1	2	1	1	1	1	2	2	2	2	1	2	3	1	1	1	1	2	2	2	1	1	2	1	2	1	2	2	2	1	2
393	1A	IWB31806	88.5242		2	1	2	2	1	1	1	1	2	2	1	1	2	2	1	2	1	1	1	1	2	2	2	2	1	2	3	1	1	1	1	2	2	2	1	1	2	1	2	1	2	2	2	1	2
394	1A	IWB59527	88.5242		2	1	2	2	1	1	1	1	2	2	1	1	2	2	1	2	1	1	1	1	2	2	2	2	1	2	3	1	1	1	1	2	2	2	1	1	2	1	2	1	2	2	2	1	2
395	1A	IWB7753	88.5242		2	1	2	2	1	1	1	1	2	2	1	1	2	2	1	2	1	1	1	1	2	2	2	2	1	2	3	1	1	1	1	2	2	2	1	1	2	1	2	1	2	2	2	1	2
396	1A	IWB78622	88.5242		2	1	2	2	1	1	1	1	2	2	1	1	2	2	1	2	1	1	1	1	2	2	2	2	1	2	3	1	1	1	1	2	2	2	1	1	2	1	2	1	2	2	2	1	2
397	1A	IWB44038	88.5242		2	1	2	2	1	1	1	1	2	2	1	1	2	2	1	2	1	1	1	1	2	2	2	2	1	2	3	1	1	1	1	2	2	2	1	1	2	1	2	1	2	2	2	1	2
398	1A	IWB31939	88.7557		2	1	2	2	1	1	1	1	2	2	1	1	2	2	1	2	1	1	1	1	2	2	2	2	1	2	3	1	1	1	1	2	2	2	1	1	2	1	2	1	2	2	2	1	2
399	1A	IWB3489	90.415		2	1	2	2	1	1	1	1	2	2	1	1	2	2	1	2	1	1	1	1	2	2	2	2	1	2	2	1	1	1	1	2	2	2	1	1	2	1	2	1	2	2	2	1	2
400	1A	IWB65398	90.415		2	1	2	2	1	1	1	1	2	2	1	1	2	2	1	2	1	1	1	1	2	2	2	2	1	2	2	1	1	1	1	3	2	3	1	1	2	1	2	1	2	2	2	1	2
401	1A	IWB46448	90.415		2	1	2	2	1	1	1	1	2	2	1	1	2	2	1	2	1	1	1	1	2	2	2	2	1	2	2	1	1	1	1	3	2	2	1	1	2	1	2	1	2	2	2	1	2
402	1A	IWB77767	90.415		2	1	2	2	1	1	1	1	2	2	1	1	2	2	1	2	1	1	1	1	2	2	2	2	1	2	2	1	1	1	1	2	2	2	1	1	2	1	2	1	2	2	2	1	2
403	1A	IWB11543	90.415		2	1	2	2	1	1	1	1	2	2	1	1	2	2	1	2	1	1	1	1	2	2	2	2	1	2	2	1	1	1	1	2	2	2	1	1	2	1	2	1	2	2	2	1	2
404	1A	IWB52379	91.5945		2	1	2	2	1	1	1	1	2	2	1	1	2	2	1	2	1	1	1	1	2	2	2	2	1	2	2	1	1	1	1	2	2	2	1	1	2	1	2	1	2	2	2	1	2
405	1A	IWB65551	93.0166		2	1	2	2	1	1	1	1	2	2	1	1	2	2	1	2	1	1	1	1	2	2	2	2	1	2	2	1	1	1	1	2	2	2	1	1	2	1	2	1	2	2	2	1	2
406	1A	IWB26566	93.0166		2	1	2	2	1	1	1	3	2	2	1	1	2	2	1	2	1	1	1	1	2	2	2	2	1	2	2	1	1	1	1	2	2	2	1	1	2	1	2	1	2	2	2	1	2
407	1A	IWB13265	93.0166		2	1	2	2	1	1	1	1	2	2	1	1	2	2	1	2	1	1	1	1	2	2	2	2	1	2	2	1	1	1	1	2	2	2	1	1	2	1	2	1	2	2	2	1	2
408	1A	IWB80253	93.0166		2	1	2	2	1	1	1	1	2	2	1	1	2	2	1	2	1	1	1	1	2	2	2	2	1	2	2	1	1	1	1	2	2	2	1	1	2	1	2	1	2	2	2	1	2
409	1A	IWB28402	93.9469		2	1	2	2	1	1	1	1	2	2	1	1	2	2	1	2	2	1	1	1	2	2	2	2	1	2	2	1	1	1	1	2	2	2	1	1	2	1	2	1	2	2	2	1	2
410	1A	IWB27332	93.9469		2	1	2	2	1	1	1	1	2	2	1	1	2	2	1	2	2	1	1	1	2	2	2	2	1	2	2	1	1	1	1	2	2	2	1	1	2	1	2	1	2	2	2	1	2
411	1A	IWB43588	93.9469		2	1	2	2	1	1	1	1	2	2	1	1	2	2	1	2	2	1	1	1	2	2	2	2	1	2	2	1	1	1	1	2	2	2	1	1	2	1	2	1	2	2	2	1	2
412	1A	IWB58118	93.9469		2	1	2	2	1	1	1	1	2	2	1	1	2	2	1	2	2	1	1	1	2	2	2	2	1	2	2	1	1	1	1	2	2	2	1	1	2	1	2	1	2	2	2	1	2
413	1A	IWB58119	93.9469		2	1	2	2	1	1	1	1	2	2	1	1	2	2	1	2	2	1	1	1	2	2	2	2	1	2	2	1	1	1	1	2	2	2	1	1	2	1	2	1	2	2	2	1	2
414	1A	IWB53633	93.9469		2	1	2	2	1	1	1	1	2	2	1	1	2	2	1	2	2	1	1	1	2	2	2	2	1	2	2	1	1	1	1	2	2	2	1	1	2	1	2	1	2	2	2	1	2
415	1A	IWB23140	93.9469		2	1	2	2	1	1	1	1	2	2	1	1	2	2	1	2	2	1	1	1	2	2	2	2	1	2	2	1	1	1	1	2	2	2	1	1	2	1	2	1	2	2	2	1	2
416	1A	IWB23141	93.9469		2	1	2	2	1	1	1	1	2	2	1	1	2	2	1	2	2	1	1	1	2	2	2	2	1	2	2	1	1	1	1	2	2	2	1	1	2	1	2	1	2	2	2	1	2
417	1A	IWB34600	96.8914	*	2	1	2	2	1	1	1	1	2	2	1	1	2	2	1	2	2	1	1	1	2	2	2	2	1	2	2	2	1	1	1	2	2	2	1	1	2	1	2	1	2	2	2	1	2
418	1A	IWB55	96.8914		2	1	2	2	1	1	1	1	2	2	1	1	2	2	1	2	2	1	1	1	2	2	2	2	1	2	2	2	1	1	1	2	2	2	1	1	2	1	2	1	2	2	2	1	2
419	1A	IWB8167	99.2971		2	1	2	2	1	1	1	1	2	2	1	1	2	2	1	2	2	1	1	2	1	2	2	2	1	2	2	2	1	1	1	2	2	2	1	1	2	1	2	1	2	2	2	1	2
420	1A	IWB8166	99.2971		2	1	2	2	1	1	1	1	2	2	1	1	2	2	1	2	2	1	1	2	1	2	2	2	1	2	2	2	1	1	1	2	2	2	1	1	2	1	2	1	2	2	2	1	2
421	1A	IWB12650	99.2971		2	1	2	2	1	1	1	1	2	2	1	1	2	2	1	2	2	1	1	2	1	2	2	2	1	2	2	2	1	1	1	2	2	2	1	1	2	1	2	1	2	2	2	1	2
422	1A	IWB80574	99.5275	*	2	1	2	2	1	1	1	1	2	2	1	1	1	2	1	2	2	1	1	2	1	2	2	2	1	2	2	2	1	1	1	2	2	2	1	1	2	1	2	1	2	2	2	1	2
423	1A	IWB80175	99.5275	*	2	1	2	2	1	1	1	1	2	2	1	1	1	2	1	2	2	1	1	2	1	2	2	2	1	2	2	2	1	1	1	2	2	2	1	1	2	1	2	1	2	2	2	1	2
424	1A	IWB62520	99.5275		2	1	2	2	1	1	1	1	2	2	1	1	1	2	1	2	2	1	1	2	1	2	2	2	1	2	2	2	1	1	1	2	2	2	1	1	2	1	2	1	2	2	2	1	2
425	1A	IWB6354	99.5275		2	1	2	2	1	1	1	1	2	2	1	1	1	2	1	2	2	1	1	2	1	2	2	2	1	2	2	2	1	1	1	2	2	2	1	1	2	1	2	1	2	2	2	1	2
426	1A	IWB31849	99.5275		2	1	2	2	1	1	1	1	2	2	1	1	1	2	1	2	2	1	1	2	1	2	2	2	1	2	2	2	1	1	1	2	2	2	1	1	2	1	2	1	2	2	2	1	2
427	1A	IWB13379	99.5275	*	2	1	2	2	1	1	1	1	2	2	1	1	1	2	1	2	2	1	1	2	1	2	2	2	1	2	2	2	1	1	1	2	2	2	1	1	2	1	2	1	2	2	2	1	2
428	1A	IWB9545	99.5275	*	2	1	2	2	1	1	1	1	2	2	1	1	1	2	1	2	2	1	1	2	1	2	2	2	1	2	2	2	1	1	1	2	2	2	1	1	2	1	2	1	2	2	2	1	2
429	1A	IWB9631	99.5275	*	2	1	2	2	1	1	1	1	2	2	1	1	1	2	1	2	2	1	1	2	1	2	2	2	1	2	2	2	1	1	1	2	2	2	1	1	2	1	2	1	2	2	2	1	2
430	1A	IWB81346	100.696	*	2	1	2	1	1	1	1	1	2	2	1	1	1	2	1	2	2	1	1	2	1	1	2	2	1	2	2	2	1	1	1	2	2	2	1	1	2	1	2	1	2	2	2	1	2
431	1A	IWB9628	100.696	*	2	1	2	1	1	1	1	1	2	2	1	1	1	2	1	2	2	1	1	2	1	1	2	2	1	2	2	2	1	1	1	2	2	2	1	1	2	1	2	1	2	2	2	1	2
432	1A	IWB35531	100.696	*	2	1	2	1	1	1	1	1	2	2	1	1	1	2	1	2	2	1	1	2	1	1	2	2	1	2	2	2	1	1	1	2	2	2	1	1	2	1	2	1	2	2	2	1	2
433	1A	IWB65938	100.696	*	2	1	2	1	1	1	1	1	2	2	1	1	1	2	1	2	2	1	1	2	1	1	2	2	1	2	2	2	1	1	1	2	2	2	1	1	2	1	2	1	2	2	2	1	2
434	1A	IWB71486	100.696	*	2	1	2	1	1	1	1	1	2	2	1	1	1	2	1	2	2	1	1	2	1	1	2	2	1	2	2	2	1	1	1	2	2	2	1	1	2	1	2	1	2	2	2	1	2
435	1A	IWB71487	100.696	*	2	1	2	1	1	1	1	1	2	2	1	1	1	2	1	2	2	1	1	2	1	1	2	2	1	2	2	2	1	1	1	2	2	2	1	1	2	1	2	1	2	2	2	1	2
436	1A	IWB73452	100.696	*	2	1	2	1	1	1	1	1	2	2	1	1	1	2	1	2	2	1	1	2	1	1	2	2	1	2	2	2	1	1	1	2	2	2	1	1	2	1	2	1	2	2	2	1	2
437	1A	IWB81354	100.696	*	2	1	2	1	1	1	1	1	2	2	1	1	1	2	1	2	2	1	1	2	1	1	2	2	1	2	2	2	1	1	1	2	2	2	1	1	2	1	2	1	2	2	2	1	2
438	1A	IWB29054	100.696	*	2	1	2	1	1	1	1	1	2	2	1	1	1	2	1	2	2	1	1	2	1	1	2	2	1	2	2	2	1	1	1	2	2	2	1	1	2	1	2	1	2	2	2	1	2
439	1A	IWB54182	100.696	*	2	1	2	1	1	1	1	1	2	2	1	1	1	2	1	2	2	1	1	2	1	1	2	2	1	2	2	2	1	1	1	2	2	2	1	1	2	1	2	1	2	2	2	1	2
440	1A	IWB72588	100.696	*	2	1	2	1	1	1	1	1	2	2	1	1	1	2	1	2	2	1	1	2	1	1	2	2	1	2	2	2	1	1	1	2	2	2	1	1	2	1	2	1	2	2	2	1	2
441	1A	IWB1972	100.696	*	2	1	2	1	1	1	1	1	2	2	1	1	1	2	1	2	2	1	1	2	1	1	2	2	1	2	2	2	1	1	1	2	2	2	1	1	2	1	2	1	2	2	2	1	2
442	1A	IWB444	100.696	*	2	1	2	1	1	1	1	1	2	2	1	1	1	2	1	2	2	1	1	2	1	1	2	2	1	2	2	2	1	1	1	2	2	2	1	1	2	1	2	1	2	2	2	1	2
443	1A	IWB14633	100.696	*	2	1	2	1	1	1	1	1	2	2	1	1	1	2	1	2	2	1	1	2	1	1	2	2	1	2	2	2	1	1	1	2	2	2	1	1	2	1	2	1	2	2	2	1	2
444	1A	IWB69793	100.696	*	2	1	2	1	1	1	1	1	2	2	1	1	1	2	1	2	2	1	1	2	1	1	2	2	1	2	2	2	1	1	1	2	2	2	1	1	2	1	2	1	2	2	2	1	2
445	1A	IWB72586	100.696	*	2	1	2	1	1	1	1	1	2	2	1	1	1	2	1	2	2	1	1	2	1	1	2	2	1	2	2	2	1	1	1	2	2	2	1	1	2	1	2	1	2	2	2	1	2
446	1A	IWB13749	100.696	*	2	1	2	1	1	1	1	1	2	2	1	1	1	2	1	2	2	1	1	2	1	1	2	2	1	2	2	2	1	1	1	3	2	2	1	1	2	1	2	1	2	2	2	1	2
447	1A	IWB11514	100.696	*	2	1	2	1	1	1	1	1	2	2	1	1	1	2	1	2	2	1	1	2	1	1	2	2	1	2	2	2	1	1	1	3	2	2	1	1	2	1	2	1	2	2	2	1	2
448	1A	IWB2243	100.696	*	2	1	2	1	1	1	1	1	2	2	1	1	1	2	1	2	2	1	1	2	1	1	2	2	1	2	2	2	1	1	1	2	2	2	1	1	2	1	2	1	2	2	2	1	2
449	1A	IWB54196	100.696	*	2	1	2	1	1	1	1	1	2	2	1	1	1	2	1	2	2	1	1	2	1	1	2	2	1	2	2	2	1	1	1	2	2	2	1	1	2	1	2	1	2	2	2	1	2
450	1A	IWB72585	100.696	*	2	1	2	1	1	1	1	1	2	2	1	1	1	2	1	2	2	1	1	2	1	1	2	2	1	2	2	2	1	1	1	2	2	2	1	1	2	1	2	1	2	2	2	1	2
451	1A	IWB31945	100.696	*	2	1	2	1	1	1	1	1	2	2	1	1	1	2	1	2	2	1	1	2	1	1	2	2	1	2	2	2	1	1	1	2	2	2	1	1	2	1	2	1	2	2	2	1	2
452	1A	IWB78293	100.696	*	2	1	2	1	1	1	1	1	2	2	1	1	1	2	1	2	2	1	1	2	1	1	2	2	1	2	2	2	1	1	1	2	2	2	1	1	2	1	2	1	2	2	2	1	2
453	1A	IWB71829	100.696	*	2	1	2	1	1	1	1	1	2	2	1	1	1	2	1	2	2	1	1	2	1	1	2	2	1	2	2	2	1	1	1	2	2	2	1	1	2	1	2	1	2	2	2	1	2
454	1A	IWB71861	100.696	*	2	1	2	1	1	1	1	1	2	2	1	1	1	2	1	2	2	1	1	2	1	1	2	2	1	2	2	2	1	1	1	2	2	2	1	1	2	1	2	1	2	2	2	1	2
455	1A	IWB56553	100.696	*	2	1	2	1	1	1	1	1	2	2	1	1	1	2	1	2	2	1	1	2	1	1	2	2	1	2	2	2	1	1	1	2	2	2	1	1	2	1	2	1	2	2	2	1	2
456	1A	IWB9455	100.696	*	2	1	2	1	1	1	1	1	2	2	1	1	1	2	1	2	2	1	1	2	1	1	2	2	1	2	2	2	1	1	1	2	2	2	1	1	2	1	2	1	2	2	2	1	2
457	1A	IWB80409	100.696	*	2	1	2	1	1	1	1	1	2	2	1	1	1	2	1	2	2	1	1	2	1	1	2	2	1	2	2	2	1	1	1	2	2	2	1	1	2	1	2	1	2	2	2	1	2
458	1A	IWB65987	100.696	*	2	1	2	1	1	1	1	1	2	2	1	1	1	2	1	2	2	1	1	2	1	1	2	2	1	2	2	2	1	1	1	3	2	2	1	1	2	1	2	1	2	2	2	1	2
459	1A	IWB72589	100.696	*	2	1	2	1	1	1	1	1	2	2	1	1	1	2	1	2	2	1	1	2	1	1	2	2	1	2	2	2	1	1	1	3	2	2	1	1	2	1	2	1	2	2	2	1	2
460	1A	IWB71862	100.696	*	2	1	2	1	1	1	1	1	2	2	1	1	1	2	1	2	2	1	1	2	1	1	2	2	1	2	2	2	1	1	1	3	2	2	1	1	2	1	2	1	2	2	2	1	2
461	1A	IWB21700	100.696	*	2	1	2	1	1	1	1	1	2	2	1	1	1	2	1	2	2	1	1	2	1	1	2	2	1	2	2	2	1	1	1	3	2	2	1	1	2	1	2	1	2	2	2	1	2
462	1A	IWB73451	100.696	*	2	1	2	1	1	1	1	1	2	2	1	1	1	2	1	2	2	1	1	2	1	1	2	2	1	2	2	2	1	1	1	3	2	2	1	1	2	1	2	1	2	2	2	1	2
463	1A	IWB1137	100.696	*	2	1	2	1	1	1	1	1	2	2	1	1	1	2	1	2	2	1	1	2	1	1	2	2	1	2	2	2	1	1	1	2	2	2	1	1	2	1	2	1	2	2	2	1	2
464	1A	IWB45538	100.696	*	2	1	2	1	1	1	1	1	2	2	1	1	1	2	1	2	2	1	1	2	1	1	2	2	1	2	2	2	1	1	1	3	2	2	1	1	2	1	2	1	2	2	2	1	2
465	1A	IWB75700	100.696	**	2	1	3	1	1	1	1	1	3	2	1	1	1	2	1	2	2	1	1	2	1	1	2	2	1	2	2	3	1	1	1	2	2	2	1	1	2	1	2	1	2	3	2	1	2
466	1A	IWB7676	100.696	*	2	1	2	1	1	1	1	1	2	2	1	1	1	2	1	2	2	1	1	2	1	1	2	2	1	2	2	2	1	1	1	2	2	2	1	1	2	1	2	1	2	2	2	1	2
467	1A	IWB4630	100.696	*	2	1	2	1	1	1	1	1	2	2	1	1	1	2	1	2	2	1	1	2	1	1	2	2	1	2	2	2	1	1	1	2	2	2	1	1	2	1	2	1	2	2	2	1	2
468	1A	IWB46690	100.928	*	2	1	2	1	1	1	2	1	2	2	1	1	1	2	1	2	2	1	1	2	1	1	2	2	1	2	2	2	1	1	1	2	2	2	1	1	2	1	2	1	2	2	2	1	2
469	1A	IWB12479	101.161	*	2	1	2	1	1	1	2	1	2	2	1	1	1	2	1	2	2	1	1	2	1	1	2	2	1	2	2	2	1	1	1	2	2	2	1	1	2	1	2	1	2	2	2	1	2
470	1A	IWB55855	101.626	*	2	1	2	1	1	1	2	1	2	2	1	1	1	2	1	2	2	1	1	2	2	1	2	2	1	2	2	2	1	1	1	2	2	2	1	1	2	1	2	1	2	2	2	1	2
471	1A	IWB11161	101.626		2	1	2	1	1	1	2	1	2	2	1	1	1	2	1	2	2	1	1	2	2	1	2	2	1	2	2	2	1	1	1	2	2	2	1	1	2	1	2	1	2	2	2	1	2
472	1A	IWB26829	104.043		2	1	2	2	1	1	2	1	2	2	1	1	1	2	1	2	2	1	1	2	2	1	2	2	1	2	2	2	1	1	1	2	2	1	2	1	2	1	2	1	2	2	2	1	2
473	1A	IWB31650	104.509		2	1	2	2	1	1	2	1	2	2	1	1	1	2	1	2	2	1	1	2	2	1	2	2	1	2	2	2	1	1	1	2	2	1	2	1	2	1	2	1	2	2	2	1	2
474	1A	IWB62911	104.739		2	1	2	2	1	1	2	1	2	2	1	2	1	2	1	2	2	1	1	2	2	1	2	2	1	2	2	2	1	1	1	2	2	1	2	1	2	1	2	1	2	2	2	1	2
475	1A	IWB78074	104.739		2	1	2	2	1	1	2	1	2	2	1	2	1	2	1	2	2	1	1	2	2	1	2	2	1	2	2	2	1	1	1	2	2	1	2	1	2	1	2	1	2	2	2	1	2
476	1A	IWB75432	104.739		2	1	2	2	1	1	2	1	2	2	1	2	1	2	1	2	2	1	1	2	2	1	2	2	1	2	2	2	1	1	1	2	2	1	2	1	2	1	2	1	2	2	2	1	2
477	1A	IWB81503	104.739		2	1	2	2	1	1	2	1	2	2	1	2	1	2	1	2	2	1	1	2	2	1	2	2	1	2	2	2	1	1	1	2	2	1	2	1	2	1	2	1	2	2	2	1	2
478	1A	IWB1728	104.97		2	1	2	2	1	1	2	1	2	2	1	1	1	2	1	2	2	1	1	2	2	1	2	2	1	2	2	2	1	1	1	2	2	1	2	1	2	1	2	1	2	2	2	1	2
479	1A	IWB68917	104.97		2	1	2	2	1	1	2	1	2	2	1	1	1	2	1	2	2	1	1	2	2	1	2	2	1	2	2	2	1	1	1	3	2	1	2	1	2	1	2	1	2	2	2	1	2
480	1A	IWB4042	105.205		2	1	2	2	1	1	2	1	2	2	1	2	1	2	1	2	2	1	1	2	2	1	2	2	1	2	2	2	1	1	1	1	2	1	2	1	2	1	2	1	2	2	2	1	2
481	1A	IWB49670	106.407		2	1	2	2	1	1	2	1	2	2	1	2	1	2	1	2	2	1	1	2	2	1	2	2	1	2	2	2	1	1	1	3	2	1	2	1	2	1	2	1	2	2	2	1	2
482	1A	IWB72493	106.407		2	1	2	2	1	1	2	1	2	2	1	2	1	2	1	2	2	1	1	2	2	1	2	2	1	2	2	2	1	1	1	2	2	1	2	1	2	1	2	1	2	2	2	1	2
483	1A	IWB78203	106.407		2	1	2	2	1	1	2	1	2	2	1	2	1	2	1	2	2	1	1	2	2	1	2	2	1	2	2	2	1	1	1	2	2	1	2	1	2	1	2	1	2	2	2	1	2
484	1A	IWB79050	106.407		2	1	2	2	1	1	2	1	2	2	1	2	1	2	1	2	2	1	1	2	2	1	2	2	1	2	2	2	1	1	1	2	2	1	2	1	2	1	2	1	2	2	2	1	2
485	1A	IWB31625	106.407		2	1	2	2	1	1	2	1	2	2	1	2	1	2	1	2	2	1	1	2	2	1	2	2	1	2	2	2	1	1	1	2	2	1	2	1	2	1	2	1	2	2	2	1	2
486	1A	IWB11406	106.407		2	1	2	2	1	1	2	1	2	2	1	2	1	2	1	2	2	1	1	2	2	1	2	2	1	2	2	2	1	1	1	2	2	1	2	1	2	1	2	1	2	2	2	1	2
487	1A	IWB64983	106.407		2	1	2	2	1	1	2	1	2	2	1	2	1	2	1	2	2	1	1	2	2	1	2	2	1	2	2	2	1	1	1	2	2	1	2	1	3	1	2	1	2	2	2	1	2
488	1A	IWB36711	106.407		2	1	2	2	1	1	2	1	2	2	1	2	1	2	1	2	2	1	1	2	2	1	2	2	1	2	2	2	1	1	1	2	2	1	2	1	2	1	2	1	2	2	2	1	2
489	1A	IWB36711	106.407		2	1	2	2	1	1	2	1	2	2	1	2	1	2	1	2	2	1	1	2	2	1	2	2	1	2	2	2	1	1	1	2	2	1	2	1	2	1	2	1	2	2	2	1	2
490	1A	IWB75424	106.407		2	1	2	2	1	1	2	1	2	2	1	2	1	2	1	2	2	1	1	2	2	1	2	2	1	2	2	2	1	1	1	2	2	1	2	1	2	1	2	1	2	2	2	1	2
491	1A	IWB53529	106.407		2	1	2	2	1	1	2	1	2	2	1	2	1	2	1	2	2	1	1	2	2	1	2	2	1	2	2	2	1	1	1	3	2	1	2	1	2	1	2	1	2	2	2	1	2
492	1A	IWB20162	107.85		2	1	2	2	1	1	2	1	2	2	1	2	1	2	1	2	2	1	1	2	2	1	2	2	1	2	2	2	1	1	1	2	2	1	2	1	2	1	2	1	2	2	2	1	2
493	1A	IWB76089	107.85		2	1	2	2	1	1	2	1	2	2	1	2	1	2	1	2	2	1	1	2	2	1	2	2	1	2	2	2	1	1	1	2	2	1	2	1	2	1	2	1	2	2	2	1	2
494	1A	IWB11109	107.85		2	1	2	2	1	1	2	1	2	2	1	2	1	2	1	2	2	1	1	2	2	1	2	2	1	2	2	2	1	1	1	2	2	1	2	1	2	1	2	1	2	2	2	1	2
495	1A	IWB7515	107.85		2	1	2	2	1	1	2	1	2	2	1	2	1	2	1	2	2	1	1	2	2	1	2	2	1	2	2	2	1	1	1	2	2	1	2	1	2	1	2	1	2	2	2	1	2
496	1A	IWB7472	108.083		2	1	2	2	1	1	2	1	2	2	1	2	1	2	1	2	2	1	1	2	2	1	2	2	1	2	2	2	1	1	1	2	2	1	2	1	2	1	2	1	2	2	2	1	2
497	1A	IWB10474	108.083		2	1	2	2	1	1	2	1	2	2	1	2	1	2	1	2	2	1	1	2	2	1	2	2	1	2	2	2	1	1	1	2	2	1	2	1	2	1	2	1	2	2	2	1	2
498	1A	IWB75434	108.083		2	1	2	2	1	1	2	1	2	2	1	2	1	2	1	2	2	1	1	2	2	1	2	2	1	2	2	2	1	1	1	2	2	1	2	1	2	1	2	1	2	2	2	1	2
499	1A	IWB68854	108.083		2	1	2	2	1	1	2	1	2	2	1	2	1	2	1	2	2	1	1	2	2	1	2	2	1	2	2	2	1	1	1	2	2	1	2	1	2	1	2	1	2	2	2	1	2
500	1A	IWB12600	108.083		2	1	2	2	1	1	2	1	2	2	1	2	1	2	1	2	2	1	1	2	2	1	2	2	1	2	2	2	1	1	1	2	2	1	2	1	2	1	2	1	2	2	2	1	2
501	1A	IWB57802	108.083		2	1	2	2	1	1	2	1	2	2	1	2	1	2	1	2	2	1	1	2	2	1	2	2	1	2	2	2	1	1	1	3	2	1	2	1	2	1	2	1	2	2	2	1	2
502	1A	IWB56724	108.083		2	1	2	2	1	1	2	1	2	2	1	2	1	2	1	2	2	1	1	2	2	1	2	2	1	2	2	2	1	1	1	3	2	1	2	1	2	1	2	1	2	2	2	1	2
503	1A	IWB65954	108.083		2	1	2	2	1	1	2	1	2	2	1	2	1	2	1	2	2	1	1	2	2	1	2	2	1	2	2	2	1	1	1	2	2	1	2	1	2	1	2	1	2	2	2	1	2
504	1A	IWB8121	108.313		2	1	2	2	1	1	2	1	2	2	1	2	1	2	1	2	2	1	1	2	2	1	2	2	1	2	2	2	1	1	1	2	2	1	2	1	2	1	2	1	2	2	2	1	2
505	1A	IWB68479	111.503		2	1	1	2	1	1	2	1	2	2	1	1	1	2	1	2	2	1	1	2	2	1	2	2	1	2	2	2	1	1	1	2	2	1	2	2	2	1	2	2	2	2	2	1	2
506	1A	IWB75349	113.437		2	1	1	2	1	1	2	1	2	2	1	1	1	2	1	2	2	1	1	2	2	1	2	2	1	2	2	2	1	1	1	2	2	1	2	2	2	1	2	2	2	2	2	1	2
507	1A	IWB77556	113.437		2	1	1	2	1	1	2	1	2	2	1	1	1	2	1	2	2	1	1	2	2	1	2	2	1	2	2	2	1	1	1	2	2	1	2	2	2	1	2	2	2	2	2	1	2
508	1A	IWB47904	117.676		2	1	1	2	2	1	2	2	2	2	1	1	1	2	1	2	2	1	1	2	1	1	2	2	1	2	2	2	1	1	1	2	2	1	2	2	2	1	2	2	2	2	2	1	2
509	1A	IWB9746	119.83		2	1	1	2	2	1	1	2	2	2	1	1	1	2	1	2	2	1	1	2	1	1	2	2	1	2	2	2	1	1	1	3	2	1	2	2	2	2	2	2	2	2	2	1	2
510	1A	IWB45733	121.754		2	1	1	2	2	1	1	2	2	2	1	1	1	2	2	2	2	1	1	2	1	1	2	2	1	2	2	2	1	1	1	2	2	1	2	2	1	2	2	2	2	2	2	1	2
511	1A	IWB77017	121.754		2	1	1	2	2	1	1	2	2	2	1	1	3	2	2	2	2	1	1	2	3	1	2	2	1	2	2	2	1	1	1	2	2	1	2	2	1	2	2	2	2	2	2	1	2
512	1A	IWB77016	121.754		2	1	1	2	2	1	1	2	2	2	1	1	1	2	2	2	2	1	1	2	1	1	2	2	1	2	2	2	1	1	1	2	2	1	2	2	1	2	2	2	2	2	2	1	2
513	1A	IWB39440	122.458		2	1	1	2	2	1	1	2	2	2	1	1	1	2	2	2	2	1	1	2	1	1	2	2	1	2	2	2	1	1	1	2	2	1	2	2	1	2	2	2	2	2	2	1	2
514	1A	IWB39439	122.458		2	1	1	2	2	1	1	2	2	2	1	1	1	2	2	2	2	1	1	2	1	1	2	2	1	2	2	2	1	1	1	2	2	1	2	2	1	2	2	2	2	2	2	1	2
515	1A	IWB66930	125.633		2	1	1	1	2	1	1	2	2	2	1	1	1	2	2	2	1	1	1	2	1	1	2	2	1	2	2	2	1	1	2	2	2	1	2	2	1	2	2	1	1	2	2	1	2
516	1A	IWB66931	125.633		2	1	1	1	2	1	1	2	2	2	1	1	1	2	2	2	1	1	1	2	1	1	2	2	1	2	2	2	1	1	2	2	2	1	2	2	1	2	2	1	1	2	2	1	2
517	1A	IWB60380	127.3		2	1	1	1	1	1	1	2	2	2	1	1	1	2	2	2	1	1	1	2	1	1	2	2	1	2	2	2	1	1	2	2	2	2	2	2	1	2	2	1	1	2	2	1	2
518	1A	IWB58616	129.215		2	1	1	1	1	1	1	2	2	2	1	1	1	2	2	2	1	1	1	2	1	1	2	2	1	2	2	2	1	1	2	3	2	2	2	2	1	2	2	1	1	2	2	1	2
519	1A	IWB72526	129.913		1	1	1	1	1	1	1	2	2	2	1	1	1	2	2	2	1	1	1	2	1	1	2	2	1	2	2	2	1	1	2	2	2	2	2	2	1	2	2	1	1	1	2	1	2
520	1A	IWB25046	129.913		1	1	1	1	1	1	1	2	2	2	1	1	1	2	2	2	1	1	1	2	1	1	2	2	1	2	2	2	1	1	2	2	2	2	2	2	1	2	2	1	1	1	2	1	2
521	1A	IWB43918	129.913		1	1	1	1	1	1	1	2	2	2	1	1	1	2	2	2	1	1	1	2	1	1	2	2	1	2	2	2	1	1	2	2	2	2	2	2	1	2	2	1	1	1	2	1	2
522	1A	IWB55224	130.142		1	1	1	1	1	1	1	2	2	2	1	1	1	2	2	2	1	1	1	2	1	1	2	2	1	2	2	2	1	1	2	2	2	2	2	2	1	2	2	1	1	1	2	1	2
523	1A	IWB3536	130.142		1	1	1	1	1	1	1	2	2	2	1	1	1	2	2	2	1	1	1	2	1	1	2	2	1	2	2	2	1	1	2	2	2	2	2	2	1	2	2	1	1	1	2	1	2
524	1A	IWB73464	130.142		1	1	1	1	1	1	1	2	2	2	1	1	1	2	2	2	1	1	1	2	1	1	2	2	1	2	2	2	1	1	2	2	2	2	2	2	1	2	2	1	1	1	2	1	2
525	1A	IWB47411	130.142		1	1	1	1	1	1	1	2	2	2	1	1	1	2	2	2	1	1	1	2	1	1	2	2	1	2	2	2	1	1	2	2	2	2	2	2	1	2	2	1	1	1	2	1	2
526	1A	IWB62537	130.142		1	1	1	1	1	1	1	2	2	2	1	1	1	2	2	2	1	1	1	2	1	1	2	2	1	2	2	2	1	1	2	2	2	2	2	2	1	2	2	1	1	1	2	1	2
527	1A	IWB25587	130.834		1	1	1	1	1	1	1	2	2	2	1	1	1	2	2	2	1	1	1	2	1	1	2	2	1	2	2	2	1	1	2	2	2	2	2	2	1	2	2	1	1	1	2	1	2
528	1A	IWB58389	130.834		1	1	1	1	1	1	1	2	2	2	1	1	1	2	2	2	1	1	1	2	1	1	2	2	1	2	2	2	1	1	2	2	2	2	2	2	1	2	2	1	1	1	2	1	2
529	1A	IWB76063	131.062		1	1	1	1	1	1	1	2	2	2	1	1	1	2	2	2	1	1	1	2	1	1	2	2	1	2	2	2	1	1	2	2	2	2	2	2	1	2	2	1	1	1	2	1	2
530	1A	IWB76404	131.062		1	1	1	1	1	1	1	2	2	2	1	1	1	2	2	2	1	1	1	2	1	1	2	2	1	2	2	2	1	1	2	2	2	2	2	2	1	2	2	1	1	1	2	1	2
531	1A	IWB76003	131.062	*	1	1	1	1	1	1	1	2	2	2	1	1	1	2	2	2	1	1	1	2	1	1	2	2	1	2	2	2	1	1	2	2	2	2	2	2	1	2	2	1	1	1	2	1	2
532	1A	IWB77827	131.062		1	1	1	1	1	1	1	2	2	2	1	1	1	2	2	2	1	1	1	2	1	1	2	2	1	2	2	2	1	1	2	2	2	2	2	2	1	2	2	1	1	1	2	1	2
533	1A	IWB77828	131.062		1	1	1	1	1	1	1	2	2	2	1	1	1	2	2	2	1	1	1	2	1	1	2	2	1	2	2	2	1	1	2	2	2	2	2	2	1	2	2	1	1	1	2	1	2
534	1A	IWB9856	131.062		1	1	1	1	1	1	1	2	2	2	1	1	1	2	2	2	1	1	1	2	1	1	2	2	1	2	2	2	1	1	2	2	2	2	2	2	1	2	2	1	1	1	2	1	2
535	1A	IWB81145	131.062		1	1	1	1	1	1	1	2	2	2	1	1	1	2	2	2	1	1	1	2	1	1	2	2	1	2	2	2	1	1	2	2	2	2	2	2	1	2	2	1	1	1	2	1	2
536	1A	IWB10613	131.062		1	1	1	1	1	1	1	2	2	2	1	1	1	2	2	2	1	1	1	2	1	1	2	2	1	2	2	2	1	1	2	2	2	2	2	2	1	2	2	1	1	1	2	1	2
537	1A	IWB61773	131.062		1	1	1	1	1	1	1	2	2	2	1	1	1	2	2	2	1	1	1	2	1	1	2	2	1	2	2	2	1	1	2	2	2	2	2	2	1	2	2	1	1	1	2	1	2
538	1A	IWB73444	131.29		1	1	1	1	1	1	1	2	2	2	1	1	1	2	2	2	1	1	1	2	1	2	2	2	1	2	2	2	1	1	2	2	2	2	2	2	1	2	2	1	1	1	2	1	2
539	1A	IWB14091	131.29		1	1	1	1	1	1	1	2	2	2	1	1	1	2	2	2	1	1	1	2	1	2	2	2	1	2	2	2	1	1	2	2	2	2	2	2	1	2	2	1	1	1	2	1	2
540	1A	IWB73445	131.29		1	1	1	1	1	1	1	2	2	2	1	1	1	2	2	2	1	1	1	2	1	2	2	2	1	2	2	2	1	1	2	2	2	2	2	2	1	2	2	1	1	1	2	1	2
541	1A	IWB8695	131.522		1	1	1	1	1	1	1	2	2	2	1	1	1	2	2	2	1	1	1	2	1	2	2	2	1	2	2	2	1	1	2	2	2	2	2	2	1	2	2	1	1	1	2	1	2
542	1A	IWB80784	139.887	*	1	1	1	1	3	1	1	2	2	2	1	1	1	1	2	2	1	2	1	2	1	2	2	2	2	2	2	2	1	1	2	2	2	2	1	2	1	2	2	1	1	1	2	1	1
543	1A	IWB13506	139.887	*	1	1	1	1	3	1	1	2	2	2	1	1	1	1	2	2	1	2	1	2	1	2	2	2	2	2	2	2	1	1	2	2	2	2	1	2	1	2	2	1	1	1	2	1	1
544	1A	IWB72899	139.887	*	1	1	1	1	3	1	1	2	2	2	1	1	1	1	2	2	1	2	1	2	1	2	2	2	2	2	2	2	1	1	2	2	2	2	1	2	1	2	2	1	1	1	2	1	1
545	1A	IWB23299	140.826	*	2	1	1	1	3	1	1	2	2	2	1	1	1	1	2	2	1	2	1	2	1	2	2	1	2	2	2	2	1	1	2	2	2	2	1	2	1	2	2	1	1	1	2	1	1
546	1A	IWB45492	140.826	*	2	1	1	1	3	1	1	2	2	2	1	1	1	1	2	2	1	2	1	2	1	2	2	1	2	2	2	2	1	1	2	2	2	2	1	2	1	2	2	1	1	1	2	1	1
547	1A	IWB44402	140.826	*	2	1	1	1	2	1	1	2	2	2	1	1	1	1	2	2	1	2	1	2	1	2	2	1	2	2	2	2	1	1	2	2	2	2	1	2	1	2	2	1	1	1	2	1	1
548	1A	IWB3034	140.826	*	2	1	1	1	3	1	1	2	2	2	1	1	1	1	2	2	1	2	1	2	1	2	2	1	2	2	2	2	1	1	2	2	2	2	1	2	1	2	2	1	1	1	2	1	1
549	1A	IWB72162	141.527	*	2	1	1	1	3	1	1	2	2	2	1	1	1	2	2	2	1	2	1	2	1	2	2	1	2	2	2	2	1	1	2	2	2	2	1	2	1	2	2	1	1	1	2	1	1
550	1A	IWB54518	141.527	*	2	1	1	1	3	1	1	2	2	2	1	1	1	2	2	2	1	2	1	2	1	2	2	1	2	2	2	2	1	1	2	3	2	2	1	2	3	2	2	1	1	1	2	1	1
551	1A	IWB15356	141.527	*	2	1	1	1	2	1	1	2	2	2	1	1	1	2	2	2	1	2	1	2	1	2	2	1	2	2	2	2	1	1	2	2	2	2	1	2	1	2	2	1	1	1	2	1	1
552	1A	IWB51933	141.527	*	2	1	1	1	3	1	1	2	2	2	1	1	1	2	2	2	1	2	1	2	1	2	2	1	2	2	2	2	1	1	2	2	2	2	1	2	1	2	2	1	1	1	2	1	1
553	1A	IWB72163	141.527	*	2	1	1	1	3	1	1	2	2	2	1	1	1	2	2	2	1	2	1	2	1	2	2	1	2	2	2	2	1	1	2	2	2	2	1	2	1	2	2	1	1	1	2	1	1
554	1A	IWB72159	141.527	*	2	1	1	1	3	1	1	2	2	2	1	1	1	2	2	2	1	2	1	2	1	2	2	1	2	2	2	2	1	1	2	2	2	2	1	2	1	2	2	1	1	1	2	1	1
555	1A	IWB72161	141.527	*	2	1	1	1	3	1	1	2	2	2	1	1	1	2	2	2	1	2	1	2	1	2	2	1	2	2	2	2	1	1	2	2	2	2	1	2	1	2	2	1	1	1	2	1	1
556	1A	IWB72160	141.527	*	2	1	1	1	3	1	1	2	2	2	1	1	1	2	2	2	1	2	1	2	1	2	2	1	2	2	2	2	1	1	2	2	2	2	1	2	1	2	2	1	1	1	2	1	1
557	1A	IWB67875	141.992		2	1	1	1	3	1	1	2	2	2	1	1	1	2	2	2	1	2	1	2	1	2	2	1	2	2	2	2	1	1	2	2	2	2	1	2	1	2	2	1	1	1	2	1	1
558	1A	IWB76225	141.992		2	1	1	1	3	1	1	2	2	2	1	1	1	2	2	2	1	2	1	2	1	2	2	1	2	2	2	2	1	1	2	2	2	2	1	2	1	2	2	1	1	1	2	1	1
559	1A	IWB24000	142.464	*	2	1	1	1	1	1	1	2	2	2	1	1	1	2	2	2	1	2	1	2	1	2	2	1	2	2	2	2	1	1	2	2	2	2	1	2	1	2	3	1	1	1	2	1	1
560	1A	IWB76232	142.464		2	1	1	1	3	1	1	2	2	2	1	1	1	2	2	2	1	2	1	2	1	2	2	1	2	2	2	2	1	1	2	2	2	2	1	2	1	2	2	1	1	1	2	1	1
561	1A	IWB31696	142.697		2	1	1	1	1	1	1	2	2	2	1	1	1	2	2	2	1	2	1	2	1	2	2	1	2	2	2	2	1	1	2	2	2	2	1	2	1	2	2	1	1	1	2	1	1
562	1A	IWB74107	142.697		2	1	1	1	1	1	1	2	2	2	1	1	3	2	2	2	1	2	1	2	1	2	2	1	2	2	2	2	1	1	2	2	2	2	1	2	1	2	2	1	1	1	2	1	1
563	1A	IWB28698	142.697		2	1	1	1	3	1	1	2	2	2	1	1	1	2	2	2	1	2	1	2	1	2	2	1	2	2	2	2	1	1	2	2	2	2	1	2	1	2	2	1	1	1	2	1	1
564	1A	IWB55536	143.408	*	2	1	1	1	3	1	1	2	2	2	1	1	1	2	2	2	1	1	1	2	1	2	2	1	2	2	2	2	1	1	2	3	2	2	1	2	1	2	2	1	1	1	2	1	1
565	1A	IWB46191	143.408	*	2	1	1	1	2	1	1	3	2	2	1	1	1	2	2	2	1	1	1	2	1	2	2	1	2	2	2	2	1	1	2	2	2	2	1	2	1	2	2	1	1	1	2	1	1
566	1A	IWB72719	143.408	*	2	1	1	1	3	1	1	2	2	2	1	1	1	2	2	2	1	1	1	2	1	2	2	1	2	2	2	2	1	1	2	2	2	2	1	2	1	2	2	1	1	1	2	1	1
567	1A	IWB58474	143.873	*	1	1	1	1	3	1	1	2	2	2	1	1	1	2	2	2	1	1	1	2	1	2	2	1	2	2	2	2	1	1	2	2	2	2	1	2	1	2	2	1	1	1	2	1	1
568	1A	IWB79890	143.873	*	1	1	3	1	3	1	1	2	2	2	1	1	1	2	2	2	1	1	1	2	1	2	2	1	2	2	2	2	1	1	2	2	2	2	1	2	1	2	2	1	1	1	2	1	1
569	1A	IWB48122	144.105	**	1	1	1	1	3	1	1	2	2	2	1	1	1	1	2	2	1	1	1	2	1	2	2	1	2	2	2	2	1	1	2	2	2	2	1	2	1	2	2	1	1	1	2	1	1
570	1A	IWB56959	144.105	*	1	1	1	1	3	1	1	2	2	2	1	1	1	1	2	2	1	1	1	2	1	2	2	1	2	2	2	2	1	1	2	2	2	2	1	2	1	2	2	1	1	1	2	1	1
571	1A	IWB42798	144.568	*	1	1	1	1	3	1	1	2	2	2	1	1	1	1	2	2	1	1	1	2	1	2	2	1	2	2	2	2	1	1	2	2	2	2	1	2	1	2	2	1	1	1	2	1	1
572	1A	IWB73557	144.568	*	1	1	1	1	3	1	1	2	2	2	1	1	1	1	2	2	1	1	1	2	1	2	2	1	2	2	2	2	1	1	2	2	2	2	1	2	1	2	2	1	1	1	2	1	1
573	1A	IWB78789	144.568	*	1	1	1	1	3	1	1	2	2	2	1	1	1	1	2	2	1	1	1	2	1	2	2	1	2	2	2	2	1	1	2	2	2	2	1	2	1	2	2	1	1	1	2	1	1
574	1A	IWB65396	144.568	*	1	1	1	1	3	1	1	2	2	2	1	1	1	1	2	2	1	1	1	2	1	2	2	1	2	2	2	2	1	1	2	2	2	2	1	2	1	2	2	1	1	1	2	1	1
575	1A	IWB80986	144.568	*	1	1	1	1	3	1	1	2	2	2	1	1	1	1	2	2	1	1	1	2	1	2	2	1	2	2	2	2	1	1	2	2	2	2	1	2	1	2	2	1	1	1	2	1	1
576	1A	IWB77770	144.568	*	1	1	1	1	3	1	1	2	2	2	1	1	1	1	2	2	1	1	1	2	1	2	2	1	2	2	2	2	1	1	2	2	2	2	1	2	1	2	2	1	1	1	2	1	1
577	1A	IWB80697	144.568	*	1	1	1	1	3	1	1	2	2	2	1	1	1	1	2	2	1	1	1	2	1	2	2	1	2	2	2	2	1	1	2	3	2	2	1	2	1	2	2	1	1	1	2	1	1
578	1A	IWB22883	144.568	*	1	1	1	1	3	1	1	2	2	2	1	1	1	1	2	2	1	1	1	2	1	2	2	1	2	2	2	2	1	1	2	2	2	2	1	2	1	2	2	1	1	1	2	1	1
579	1A	IWB4244	144.568	*	1	1	1	1	3	1	1	2	2	2	1	1	1	1	2	2	1	1	1	2	1	2	2	1	2	2	2	2	1	1	2	2	2	2	1	2	1	2	2	1	1	1	2	1	1
580	1A	IWB22882	144.568	*	1	1	1	1	3	1	1	2	2	2	1	1	1	1	2	2	1	1	1	2	1	2	2	1	2	2	2	2	1	1	2	2	2	2	1	2	1	2	2	1	1	1	2	1	1
581	1A	IWB35045	144.568	*	1	1	1	1	3	1	1	2	2	2	1	1	1	1	2	2	1	1	1	2	1	2	2	1	2	2	2	2	1	1	2	2	2	2	1	2	1	2	2	1	1	1	2	1	1
582	1A	IWB28418	146.723	**	1	1	1	1	3	1	1	2	2	2	1	1	1	1	2	2	1	1	1	2	1	2	2	1	2	2	1	1	1	1	2	2	2	2	1	2	1	1	1	1	2	1	2	1	1
583	1A	IWB73482	146.723	**	1	1	1	1	3	1	1	2	2	2	1	1	1	1	2	2	1	1	1	2	1	2	2	1	2	2	1	1	1	1	2	2	2	2	1	2	1	1	1	1	2	1	2	1	1
584	1A	IWB75809	146.723	**	1	1	1	1	3	1	1	2	2	2	1	1	1	1	2	2	1	1	1	2	1	2	2	1	2	2	1	1	1	1	2	2	2	2	1	2	1	1	1	1	2	1	2	1	1
585	1A	IWB2446	148.898	**	1	1	1	1	3	1	1	2	2	2	1	1	1	1	2	2	1	1	1	2	1	2	2	1	2	2	1	1	1	1	2	2	2	2	1	2	1	1	1	1	1	1	2	1	1
586	1A	IWB36475	148.898	**	1	1	1	1	3	1	1	2	2	2	1	1	1	1	2	2	1	1	1	2	1	2	2	1	2	2	1	1	1	1	2	2	2	2	1	2	1	1	1	1	1	1	2	1	1
587	1A	IWB79405	153.711	**	1	2	1	1	1	1	1	2	2	2	1	1	1	1	2	2	1	1	1	2	1	2	2	1	2	2	1	1	1	1	2	2	2	2	2	2	1	1	1	1	1	1	2	1	1
588	1A	IWB77446	153.711	**	1	2	1	1	1	1	1	2	2	2	1	1	1	1	2	2	1	1	1	2	1	2	2	1	2	2	1	1	1	1	2	2	2	2	2	2	1	1	1	1	1	1	2	1	1
589	1A	IWB20487	153.943	***	1	2	1	1	1	1	1	2	2	2	1	1	1	1	2	2	1	1	1	2	1	2	2	1	2	2	1	1	1	1	2	2	2	2	2	2	1	1	1	1	1	1	2	1	1
590	1A	IWB10223	154.878	**	1	2	1	1	1	1	1	2	2	2	1	1	1	1	2	2	1	1	1	2	1	2	2	1	2	2	1	1	1	1	2	2	2	2	2	2	1	1	1	1	1	1	2	2	1
591	1A	IWB31719	155.109	**	1	2	1	1	1	1	1	2	2	2	1	1	1	1	2	2	1	1	1	2	1	2	2	1	2	2	1	1	1	1	2	2	2	2	2	2	1	1	1	1	1	1	2	2	1
592	1A	IWB78248	155.109	**	1	2	1	1	1	1	1	2	2	2	1	1	1	1	2	2	1	1	1	2	1	2	2	1	2	2	1	1	1	1	2	3	2	2	2	2	1	1	1	1	1	1	2	2	1
593	1A	IWB43929	155.109	**	1	2	1	1	1	1	1	2	2	2	1	1	1	1	2	2	1	1	1	2	1	2	2	1	2	2	1	1	1	1	2	2	2	2	2	2	1	1	1	1	1	1	2	2	1
594	1A	IWB80052	155.109	**	1	2	1	1	1	1	1	2	2	2	1	1	1	1	2	2	1	1	1	2	1	2	2	1	2	2	1	1	1	1	2	2	2	2	2	2	1	1	1	1	1	1	2	2	1
595	1A	IWB12340	155.109	**	1	2	1	1	1	1	1	2	2	2	1	1	1	1	2	2	1	1	1	2	1	2	2	1	2	2	1	1	1	1	2	2	2	2	2	2	1	1	1	1	1	1	2	2	1
596	1A	IWB38852	155.109	**	1	2	1	1	1	1	1	2	2	2	1	1	1	1	2	2	1	1	1	2	1	2	2	1	2	2	1	1	1	1	2	2	2	2	2	2	1	1	1	1	1	1	2	2	1
597	1A	IWB53622	155.109	**	1	2	1	1	1	1	1	2	2	2	1	1	1	1	2	2	1	1	1	2	1	2	2	1	2	2	1	1	1	1	2	2	2	2	2	2	1	1	1	1	1	1	2	2	1
598	1A	IWB73184	155.109	**	1	2	1	1	1	1	1	2	2	2	1	1	1	1	2	2	1	1	1	2	1	2	2	1	2	2	1	1	1	1	2	2	2	2	2	2	1	1	1	1	1	1	2	2	1
599	1A	IWB80603	155.109	**	1	2	1	1	1	1	1	2	2	2	1	1	1	1	2	2	1	1	1	2	1	2	2	1	2	2	1	1	1	1	2	2	2	2	2	2	1	1	1	1	1	1	2	2	1
600	1A	IWB70021	155.109	**	1	2	1	1	1	1	1	2	2	2	1	1	1	1	2	2	1	1	1	2	1	2	2	1	2	2	1	1	1	1	2	2	2	2	2	2	1	1	1	1	1	1	2	2	1
601	1A	IWB77519	155.109	**	1	2	1	1	1	1	3	2	2	2	1	1	1	1	2	2	1	1	1	2	1	2	2	1	2	2	1	1	1	1	2	2	2	2	2	2	1	1	1	1	1	1	2	2	1
602	1A	IWB76355	155.109	**	1	2	1	1	1	1	1	2	2	2	1	1	1	1	2	2	1	1	1	2	1	2	2	1	2	2	1	1	1	1	2	2	2	2	2	2	1	1	1	1	1	1	2	2	1
603	1A	IWB6843	155.109	**	1	2	1	1	1	1	1	2	2	2	1	1	1	1	2	2	1	1	1	2	1	2	2	3	2	2	1	1	1	1	2	3	2	2	2	2	1	1	1	1	1	1	2	2	1
604	1A	IWB69908	155.109	**	1	2	1	1	1	1	1	2	2	2	1	1	1	1	2	2	1	1	1	2	1	2	2	1	2	2	1	1	1	1	2	3	2	2	2	2	1	1	1	1	1	1	2	2	1
605	1A	IWB76354	155.109	**	1	2	1	1	1	1	1	2	2	2	1	1	1	1	2	2	1	1	1	2	1	2	2	1	2	2	1	1	1	1	2	3	2	2	2	2	1	1	1	1	1	1	2	2	1
606	1A	IWB11395	155.109	**	1	2	1	1	3	1	1	2	2	2	1	1	1	1	2	2	1	1	1	2	1	2	2	1	2	2	1	1	1	1	2	2	2	2	2	2	1	1	1	1	3	1	2	2	1
607	1A	IWB13624	157.562	***	1	2	1	1	1	1	1	2	2	2	1	1	1	1	2	2	1	1	1	2	1	2	2	1	2	2	1	1	1	1	2	2	2	2	2	2	1	1	2	1	1	1	2	2	1
608	1A	IWB59699	157.562	***	1	2	1	1	1	1	1	2	2	2	1	1	1	1	2	2	1	1	1	2	1	2	2	1	2	2	1	1	1	1	2	2	2	2	2	2	1	1	2	1	1	1	2	2	1
609	1A	IWB8044	157.562	**	1	2	1	1	1	1	1	2	2	2	1	1	1	1	2	2	1	1	1	2	1	2	2	1	2	2	1	1	1	1	2	2	2	2	2	2	1	1	2	1	1	1	2	2	1
610	1A	IWB15736	157.562	**	1	2	1	1	1	1	1	2	2	2	1	1	1	1	2	2	1	1	1	2	1	2	2	1	2	2	1	1	1	1	2	2	2	2	2	2	1	1	2	1	1	1	2	2	1
611	1A	IWB57894	157.562	**	1	2	1	1	1	1	1	2	2	2	1	3	1	1	2	2	1	1	1	2	1	2	2	3	2	2	1	1	1	1	2	2	2	2	2	2	1	1	2	1	1	1	2	2	1
612	1A	IWB8702	157.562	**	1	2	1	1	1	1	1	2	2	2	1	1	3	1	2	2	1	1	1	2	1	2	2	3	2	2	1	1	1	1	2	2	2	2	2	2	1	1	2	1	1	1	2	2	1
613	1A	IWB58735	158.027	***	1	2	1	1	1	1	1	2	2	2	1	1	1	1	2	2	1	1	1	1	1	2	2	3	2	2	1	1	1	1	2	2	2	2	2	2	1	1	2	1	1	1	2	2	1
614	1A	IWB81210	158.027	***	1	2	1	1	1	1	1	2	2	2	1	1	1	1	2	2	1	1	1	1	1	2	2	1	2	2	1	1	1	1	2	2	2	2	2	2	1	1	2	1	1	1	2	2	1
615	1A	IWB39186	158.966	**	1	2	1	1	1	1	1	2	2	2	1	1	1	1	2	2	1	1	1	1	1	2	2	1	2	2	1	1	1	1	2	2	2	2	2	2	1	1	2	1	1	1	2	2	1
616	1A	IWB45182	159.667	***	1	2	1	1	1	1	1	2	2	2	1	1	1	1	2	2	1	1	1	1	1	2	2	1	2	2	1	1	1	1	2	2	2	2	2	2	1	1	2	1	1	1	2	2	1
617	1A	IWB48030	159.667	***	1	2	1	1	1	1	1	2	2	2	1	1	1	1	2	2	1	1	1	1	1	2	2	1	2	2	1	1	1	1	2	2	2	2	2	2	1	1	2	1	1	1	2	2	1
618	1A	IWB79343	159.667	***	1	2	1	1	1	1	1	2	2	2	1	1	1	1	2	2	1	1	1	1	1	2	2	1	2	2	1	1	1	1	2	2	2	2	2	2	1	1	2	1	1	1	2	2	1
619	1A	IWB22174	159.667	***	1	2	1	1	1	1	1	2	2	2	1	1	1	1	2	2	1	1	1	1	1	2	2	1	2	2	1	1	1	1	2	2	2	2	2	2	1	1	2	1	1	1	2	2	1
620	1A	IWB35476	159.667	***	1	2	1	1	1	1	1	2	2	2	1	1	1	1	2	2	1	1	1	1	1	2	2	1	2	2	1	1	1	1	2	2	2	2	2	2	1	1	2	1	1	1	2	2	1
621	1A	IWB27546	159.667	***	1	2	1	1	1	1	1	2	2	2	1	1	1	1	2	2	1	1	1	1	1	2	2	1	2	2	1	1	1	1	2	2	2	2	2	2	1	1	2	1	1	1	2	2	1
622	1A	IWB31959	159.667	***	1	2	1	1	1	1	1	2	2	2	1	1	1	1	2	2	1	1	1	1	1	2	2	1	2	2	1	1	1	1	2	2	2	2	2	2	1	1	2	1	1	1	2	2	1
623	1A	IWB81530	159.667	***	1	2	1	1	1	1	1	2	2	2	1	1	1	1	2	2	1	1	1	1	1	2	2	1	2	2	1	1	1	1	2	2	2	2	2	2	1	1	2	1	1	1	2	2	1
624	1A	IWB49684	159.667	***	1	2	1	1	1	1	1	2	2	2	1	1	1	1	2	2	1	1	1	1	1	2	2	1	2	2	1	1	1	1	2	2	2	2	2	2	1	1	2	1	1	1	2	2	1
625	1A	IWB67027	159.667	**	1	2	1	1	1	1	1	2	2	2	1	1	1	1	2	2	1	1	1	1	1	2	2	1	2	2	1	1	1	1	2	2	2	2	2	2	1	1	2	1	1	1	2	2	1
626	1A	IWB30871	159.667	**	1	2	1	1	1	1	1	2	2	2	1	1	1	1	2	2	1	1	1	1	1	2	2	1	2	2	1	1	1	1	2	2	2	2	2	2	1	1	2	1	1	1	2	2	1
627	1A	IWB31956	159.667	**	1	2	1	1	1	1	1	2	2	2	1	1	1	1	2	2	1	1	1	1	1	2	2	1	2	2	1	1	1	1	2	2	2	2	2	2	1	1	2	1	1	1	2	2	1
628	1A	IWB76476	159.667	**	1	2	1	1	1	1	1	2	2	2	1	1	1	1	2	2	1	1	1	1	1	2	2	1	2	2	1	1	1	1	2	2	2	2	2	2	1	1	2	1	1	1	2	2	1
629	1A	IWB26766	159.667	**	1	2	1	1	1	1	1	2	2	2	1	1	1	1	2	2	1	1	1	1	1	2	2	1	2	2	1	1	1	1	2	2	2	2	2	2	1	1	2	1	1	1	2	2	1
630	1A	IWB58726	159.667	**	1	2	1	1	1	1	1	2	2	2	1	1	1	1	2	2	1	1	1	1	1	2	2	1	2	2	1	1	1	1	2	2	2	2	2	2	1	1	2	1	1	1	2	2	1
631	1A	IWB81526	159.667	**	1	2	1	1	1	1	1	2	2	2	1	1	1	1	2	2	1	1	1	1	1	2	2	1	2	2	1	1	1	1	2	2	2	2	2	2	1	1	2	1	1	1	2	2	1
632	1A	IWB9978	159.667	**	1	2	1	1	1	1	1	2	2	2	1	1	1	1	2	2	1	1	1	1	1	2	2	1	2	2	1	1	1	1	2	2	2	2	2	2	1	1	2	1	1	1	2	2	1
633	1A	IWB34872	159.667	***	1	2	1	1	1	1	1	2	2	2	1	1	1	1	2	2	1	1	1	1	1	2	2	1	2	2	1	1	1	1	2	2	2	2	2	2	1	1	2	1	1	1	2	2	1
634	1A	IWB31958	159.667	***	1	2	1	1	1	1	1	2	2	2	1	1	1	1	2	2	1	1	1	1	1	2	2	1	2	2	1	1	1	1	2	3	2	2	2	2	1	1	2	1	1	1	2	2	1
635	1A	IWB59766	159.667	***	1	2	1	1	1	1	1	2	2	2	1	1	1	1	2	2	1	1	1	1	1	2	2	1	2	2	1	1	1	1	2	2	2	2	2	2	1	1	2	1	1	1	2	2	1
636	1A	IWB9191	159.667	**	1	2	1	1	1	1	1	2	2	2	1	1	1	1	2	2	1	1	1	1	1	2	2	1	2	2	1	1	1	1	2	2	2	2	2	2	1	1	2	1	1	1	2	2	1
637	1A	IWB59763	159.667	***	1	2	1	1	1	1	1	2	2	2	1	1	1	1	2	2	1	1	1	1	1	2	2	1	2	2	1	1	1	1	2	2	2	2	2	2	1	1	2	1	1	1	2	3	1
638	1A	IWB31955	159.667	**	1	2	1	1	1	1	1	2	2	2	1	1	1	1	2	2	1	1	1	1	1	2	2	1	2	2	1	1	1	1	2	3	2	2	2	2	1	1	2	1	1	1	2	2	1
639	1A	IWB45183	159.667	**	1	2	1	1	1	1	1	2	2	2	1	1	1	1	2	2	1	1	1	1	1	2	2	1	2	2	1	1	1	1	2	3	2	2	2	2	1	1	2	1	1	1	2	2	1
640	1A	IWB65431	159.667	**	1	2	1	1	1	1	1	2	2	2	1	1	1	1	2	2	1	1	1	1	1	2	2	1	2	2	1	1	1	1	2	3	2	2	2	2	1	1	2	1	1	1	2	2	1
641	1A	IWB49951	159.667	**	1	2	1	1	3	1	1	2	2	2	1	1	1	1	2	2	1	1	1	1	1	2	2	1	2	2	1	1	1	1	2	2	2	2	2	2	1	1	2	1	1	1	2	2	1
642	1A	IWB49947	159.667	**	1	2	1	1	1	1	1	2	2	2	1	1	1	1	2	2	1	1	1	1	1	2	2	3	2	2	1	1	1	1	2	2	2	2	2	2	1	1	2	1	1	1	2	2	1
643	1A	IWB26765	159.667	**	1	2	1	1	1	1	1	2	2	2	1	1	1	1	2	2	1	1	1	1	1	2	2	1	2	2	1	1	1	1	2	2	2	2	2	2	1	1	2	1	1	1	2	2	1
644	1A	IWB34353	160.606	**	1	2	1	1	1	1	1	2	2	2	1	1	1	1	2	2	2	1	1	1	1	2	2	1	2	2	1	1	1	1	2	2	2	2	2	2	1	1	2	1	1	1	2	2	1
645	1A	IWB10132	160.838	**	1	2	1	1	1	1	1	2	2	2	1	1	1	1	2	2	2	1	1	1	1	2	2	1	2	2	1	1	1	1	2	2	2	2	2	2	1	1	2	1	1	1	2	2	1
646	1A	IWB22117	160.838	**	1	2	1	1	1	1	1	2	2	2	1	1	1	1	2	2	2	1	1	1	1	2	2	1	2	2	1	1	1	1	2	2	2	2	2	2	1	1	2	1	1	1	2	2	1
647	1A	IWB76422	160.838	**	1	2	1	1	1	1	1	2	2	2	1	1	1	1	2	2	2	1	1	1	1	2	2	1	2	2	1	1	1	1	2	2	2	2	2	2	1	1	2	1	1	1	2	2	1
648	1A	IWB45352	161.067	**	1	2	1	1	1	1	1	2	2	2	1	1	1	1	2	2	2	1	1	1	1	2	2	1	2	2	1	1	1	1	2	2	2	2	2	2	1	1	2	1	1	1	2	2	1
649	1A	IWB31545	161.297	**	1	2	1	1	1	1	1	2	2	2	1	1	1	1	2	2	2	1	1	1	1	2	2	1	2	2	1	1	1	1	2	2	2	2	2	2	1	1	2	1	1	1	2	2	1
650	1A	IWB41993	163.679	*	2	2	1	1	1	1	1	2	2	2	1	1	1	1	2	2	2	1	1	1	1	2	2	1	2	2	1	1	1	1	2	2	2	2	2	2	1	1	1	1	1	2	2	2	1
651	1A	IWB79586	163.679	*	2	2	1	1	1	1	1	2	2	2	1	1	1	1	2	2	2	1	1	1	1	2	2	1	2	2	1	1	1	1	2	2	2	2	2	2	1	1	1	1	1	2	2	2	1
652	1A	IWB22896	163.679	*	2	2	1	1	1	1	1	2	2	2	1	1	1	1	2	2	2	1	1	1	1	2	2	1	2	2	1	1	1	1	2	2	2	2	2	2	1	1	1	1	1	2	2	2	1
653	1A	IWB79639	163.679	*	2	2	1	1	1	1	1	2	2	2	1	1	1	1	2	2	2	1	1	1	1	2	2	1	2	2	1	1	1	1	2	2	2	2	2	2	1	1	1	1	1	2	2	2	1
654	1A	IWB78072	163.679	*	2	2	1	1	1	1	1	2	2	2	1	1	1	1	2	2	2	1	1	1	1	2	2	1	2	2	1	1	1	1	2	2	2	2	2	2	1	1	1	1	1	2	2	2	1
655	1A	IWB77613	163.679	*	2	2	1	1	1	1	1	2	2	2	1	1	1	1	2	2	2	1	1	1	1	2	2	1	2	2	1	1	1	1	2	3	2	2	2	2	1	1	1	1	1	2	2	2	1
656	1A	IWB75215	163.679	*	2	2	1	1	1	1	1	2	2	2	1	1	1	1	2	2	2	1	1	1	1	2	2	1	2	2	1	1	1	1	2	2	2	2	2	2	1	1	1	1	1	2	2	2	1
657	1A	IWB71743	163.679	*	2	2	1	1	1	1	1	2	2	2	1	1	1	1	2	2	2	1	1	1	1	2	2	1	2	2	1	1	1	1	2	3	2	2	2	2	1	1	1	1	1	2	2	2	1
658	1A	IWB71745	163.679	*	2	2	1	1	1	1	1	2	2	2	1	1	1	1	2	2	2	1	1	1	1	2	2	1	2	2	1	1	1	1	2	3	2	2	2	2	1	1	1	1	1	2	2	2	1
1	1B	IWB10784	0		2	1	1	1	2	3	2	2	1	1	1	2	1	2	1	1	2	2	1	1	1	2	1	2	2	1	1	1	1	1	3	3	1	1	1	2	2	2	2	2	2	1	2	2	1
2	1B	IWB25591	0		2	1	1	1	2	1	2	2	1	1	1	2	1	2	1	1	2	2	1	1	1	2	1	2	2	1	1	1	1	1	3	3	1	1	1	2	2	2	2	2	2	1	2	2	1
3	1B	IWB19251	0		2	1	1	1	2	1	2	2	1	1	1	2	1	2	1	1	2	2	1	1	1	2	1	2	2	1	1	1	1	1	2	2	1	1	1	2	2	2	2	2	2	1	2	2	1
4	1B	IWB56433	0		2	1	1	1	2	1	2	2	1	1	1	2	1	2	1	1	2	2	1	1	1	2	1	2	2	1	1	1	1	1	3	2	1	1	1	2	2	2	2	2	2	1	2	2	1
5	1B	IWB19825	0		2	1	1	1	2	1	2	2	1	1	1	2	1	2	1	1	2	2	1	1	1	2	1	2	2	1	1	1	1	1	3	2	1	1	1	2	2	2	2	2	2	1	2	2	1
6	1B	IWB10537	0		2	1	1	1	2	1	2	2	1	1	1	2	1	2	1	1	2	2	1	1	1	2	1	2	2	1	1	1	1	1	3	2	1	1	1	2	2	2	2	2	2	1	3	2	1
7	1B	IWB6621	0		2	1	1	1	2	1	2	2	1	1	1	2	1	2	1	1	2	2	1	1	1	2	1	2	2	1	1	1	1	1	3	2	1	1	1	2	2	2	2	2	2	1	2	2	1
8	1B	IWB26467	0.467293		2	1	1	1	2	1	2	2	1	1	1	2	1	2	1	1	2	2	2	1	1	2	1	2	2	1	1	1	1	1	3	2	1	1	1	2	2	2	2	2	2	1	2	2	1
9	1B	IWB11262	0.467293		2	1	1	1	2	1	2	2	1	1	1	2	1	2	1	1	2	2	2	1	1	2	1	2	2	1	1	1	1	1	3	2	1	1	1	2	2	2	2	2	2	1	2	2	1
10	1B	IWB7795	0.467293		2	1	1	1	2	1	2	2	1	1	1	2	1	2	1	1	2	2	2	1	1	2	1	2	2	1	1	1	1	1	3	2	1	1	1	2	2	2	2	2	2	1	2	2	1
11	1B	IWB56773	0.467293		2	1	1	1	2	1	2	2	1	1	1	2	1	2	1	1	2	2	2	1	1	2	1	2	2	1	1	1	1	1	3	2	1	1	1	2	2	2	2	2	2	1	2	2	1
12	1B	IWB52681	0.467293		2	1	1	1	2	1	2	2	1	1	1	2	1	2	1	1	2	2	2	1	1	2	1	2	2	1	1	1	1	1	3	2	1	1	1	2	2	2	2	2	2	1	2	2	1
13	1B	IWB57592	0.467293		2	1	1	1	2	1	2	2	1	1	1	2	1	2	1	1	2	2	2	1	1	2	1	2	2	1	1	1	1	1	2	2	1	1	1	2	2	2	2	2	2	1	2	2	1
14	1B	IWB44730	0.467293		2	1	1	1	2	1	2	2	1	1	1	2	1	2	1	1	2	2	2	1	1	2	1	2	2	1	1	1	1	1	3	2	1	1	1	2	2	2	2	2	2	1	2	2	1
15	1B	IWB12632	0.467293		2	1	1	1	2	1	2	2	1	1	1	2	1	2	1	1	2	2	2	1	1	2	1	3	2	1	1	1	1	1	3	2	1	1	1	2	2	2	2	2	2	1	2	2	1
16	1B	IWB65421	0.467293		2	1	1	1	2	1	2	2	1	1	1	2	3	2	1	1	2	2	2	1	1	2	1	2	2	1	1	1	1	1	3	3	1	1	1	2	2	2	2	2	2	1	2	2	1
17	1B	IWB26463	0.467293		2	1	1	1	2	1	2	2	1	1	1	2	1	2	1	1	2	2	2	1	1	2	1	2	2	1	1	1	1	1	1	2	1	1	1	2	2	2	2	2	2	1	2	2	1
18	1B	IWB61361	4.66421		2	1	1	1	2	2	1	1	1	1	1	2	1	2	1	1	2	2	2	1	1	2	1	2	2	1	1	1	1	1	1	2	2	1	1	2	2	2	2	1	2	1	2	2	1
19	1B	IWB34802	4.66421		2	1	1	1	2	2	1	1	1	1	1	2	1	2	1	1	2	2	2	1	1	2	1	2	2	1	1	1	1	1	3	2	2	1	1	2	2	2	2	1	2	1	2	2	1
20	1B	IWB34770	4.66421		2	1	1	1	2	2	1	1	1	1	1	2	1	2	1	1	2	2	2	1	1	2	1	2	2	1	1	1	1	1	3	2	2	1	1	2	2	2	2	1	2	1	2	2	1
21	1B	IWB61101	4.66421		2	1	1	1	2	2	1	1	1	1	1	2	1	2	1	1	2	2	2	1	1	2	1	2	2	1	1	1	1	1	3	2	2	1	1	2	2	2	2	1	2	1	2	2	1
22	1B	IWB44448	4.66421		2	1	1	1	2	2	1	1	1	1	1	2	1	2	1	1	2	2	2	1	1	2	1	2	2	1	1	1	1	1	3	2	2	1	1	2	2	2	2	1	2	1	2	2	1
23	1B	IWB53299	4.66421		2	1	1	1	2	2	1	1	1	1	1	2	1	2	1	1	2	2	2	1	1	2	1	2	2	1	1	1	1	1	3	2	2	1	1	2	2	2	2	1	2	1	2	2	1
24	1B	IWB24741	4.66421		2	1	1	1	2	2	1	1	1	1	1	2	1	2	1	1	2	2	2	1	1	2	1	2	2	1	1	1	1	1	3	2	2	1	1	2	2	2	2	1	2	1	2	2	1
25	1B	IWB73733	4.66421		2	1	1	1	2	2	1	1	1	1	1	2	1	2	1	1	2	2	2	1	1	2	1	2	2	1	1	1	1	1	1	2	2	1	1	2	2	2	2	1	2	1	2	2	1
26	1B	IWB7076	4.89462		2	1	1	1	2	2	1	1	1	1	1	2	1	2	1	1	2	2	2	1	1	2	1	2	2	1	1	1	1	1	3	2	2	1	1	2	2	2	2	1	2	1	2	2	1
27	1B	IWB9566	4.89462		2	1	1	1	2	2	1	1	1	1	1	2	1	2	1	1	2	2	2	1	1	2	1	2	2	1	1	1	1	1	3	2	2	1	1	2	2	2	2	1	2	1	2	2	1
28	1B	IWB11118	5.35759		2	1	1	1	2	2	1	1	1	1	1	2	1	2	1	1	2	2	2	1	1	2	1	2	2	1	1	1	1	1	3	2	2	1	1	2	2	2	2	1	2	1	2	2	1
29	1B	IWB75373	6.29226		2	1	1	1	2	2	1	1	1	1	1	2	1	2	1	1	2	2	2	1	1	2	1	2	2	1	1	1	2	1	3	2	2	1	1	2	2	2	2	1	2	1	2	2	1
30	1B	IWB6905	6.29226		2	1	1	1	2	2	1	1	1	1	1	2	1	2	1	1	2	2	2	1	1	2	1	2	2	1	1	1	2	1	3	2	2	1	1	2	2	2	2	1	2	1	2	2	1
31	1B	IWB11925	6.75522		2	1	1	1	2	2	1	1	1	1	1	2	1	2	1	1	2	2	2	1	1	2	1	2	2	1	1	1	2	1	3	2	2	1	1	2	2	2	2	1	2	1	2	2	1
32	1B	IWB44529	6.9867		2	1	1	1	2	2	1	1	1	1	1	2	1	2	1	1	2	2	2	1	1	2	1	2	2	1	1	1	2	1	3	2	2	1	1	2	2	2	2	1	2	1	2	2	1
33	1B	IWB7368	6.9867		2	1	1	1	2	2	1	1	1	1	1	2	1	2	1	1	2	2	2	1	1	2	1	2	2	1	1	1	2	1	3	2	2	1	1	2	2	2	2	1	2	1	2	2	1
34	1B	IWB57219	6.9867		2	1	1	1	2	2	1	1	1	1	1	2	1	2	1	1	2	2	2	1	1	2	1	2	2	1	1	1	2	1	3	2	2	1	1	2	3	2	2	1	2	1	2	2	1
35	1B	IWB39279	6.9867		2	1	1	1	2	2	1	1	1	1	1	2	1	2	1	1	2	2	2	1	1	2	1	3	2	1	1	1	2	1	3	2	2	1	1	2	2	2	2	1	2	1	2	2	1
36	1B	IWB48324	6.9867		2	1	1	1	2	2	1	1	1	1	1	2	1	2	1	1	2	2	2	1	1	2	1	2	2	1	1	1	2	1	3	3	2	1	1	2	2	2	2	1	2	1	2	2	1
37	1B	IWB39278	6.9867		2	1	1	1	2	2	1	1	1	1	1	2	1	2	1	1	2	2	2	1	1	2	1	2	2	1	1	1	2	1	1	2	2	3	1	2	2	2	2	1	2	1	2	2	1
38	1B	IWB24688	6.9867		2	1	1	1	2	2	1	1	1	1	1	2	1	3	1	1	2	2	2	1	1	2	1	3	2	1	1	1	2	1	1	3	2	1	1	2	2	2	2	1	2	1	2	2	1
39	1B	IWB12157	6.9867		2	1	1	1	2	2	1	1	1	1	1	2	1	2	1	1	2	2	2	1	1	2	1	2	2	1	1	1	2	1	3	2	2	1	1	2	2	2	2	1	2	1	2	2	1
40	1B	IWB80081	7.46064		2	1	1	1	2	2	1	1	1	1	1	2	1	2	1	1	2	2	2	1	1	2	1	2	2	1	1	1	2	1	1	2	2	1	1	2	2	2	2	1	2	1	2	2	1
41	1B	IWB76533	7.94373		2	1	1	1	2	2	1	1	1	1	1	2	1	2	1	1	2	2	2	1	1	3	1	2	2	1	1	1	3	1	1	2	2	1	1	2	2	2	2	1	2	1	2	2	1
42	1B	IWB43001	7.94373		2	1	1	1	2	2	1	3	1	1	1	2	1	2	1	1	2	2	2	1	1	2	1	3	2	1	1	1	2	1	1	2	2	1	1	2	2	2	2	1	2	1	2	2	1
43	1B	IWB80763	7.94373		2	1	1	1	2	2	1	1	1	1	1	2	1	2	1	1	2	2	2	1	1	2	1	2	2	1	1	1	2	1	3	3	2	1	1	2	2	2	2	1	2	1	2	2	1
44	1B	IWB80764	7.94373		2	1	1	1	2	2	1	1	1	1	1	2	1	2	1	1	2	2	2	1	1	2	1	2	2	1	1	1	2	1	3	2	2	1	1	2	2	2	3	1	2	1	2	2	1
45	1B	IWB7731	10.6691	*	2	1	1	1	2	2	1	1	1	1	1	2	1	1	1	1	2	2	2	1	1	2	1	2	2	1	1	2	2	1	3	3	2	1	1	2	2	2	2	1	2	1	2	2	1
46	1B	IWB47674	11.8655	*	2	1	1	1	2	2	2	1	1	1	1	2	1	1	1	1	2	2	2	1	1	2	1	2	2	1	1	2	2	1	3	2	2	1	1	2	2	2	2	1	2	1	2	2	1
47	1B	IWB7600	12.0991	*	2	1	1	1	2	2	2	1	1	1	1	2	1	1	1	1	2	2	2	1	1	2	1	2	2	1	1	2	2	1	3	3	2	1	1	2	2	2	2	1	2	1	2	2	1
48	1B	IWB7599	12.0991	*	2	1	1	1	2	2	2	1	1	1	1	2	1	1	1	1	2	2	2	1	1	2	1	2	2	1	1	2	2	1	3	3	2	1	1	2	2	2	2	1	2	1	2	2	1
49	1B	IWB72623	12.0991	*	2	1	1	1	2	2	2	1	1	1	1	2	1	1	1	1	2	2	2	1	1	2	1	2	2	1	1	2	2	1	3	2	2	1	1	2	2	2	2	1	2	1	2	2	1
50	1B	IWB14011	12.8001	**	2	1	1	1	2	2	2	1	1	1	1	2	1	1	1	1	2	2	2	1	1	2	1	2	2	1	1	2	2	1	3	2	2	1	1	2	2	2	2	1	2	1	2	2	1
51	1B	IWB62711	12.8001	**	2	1	1	1	2	2	2	1	1	1	1	2	1	1	1	1	2	2	2	1	1	2	1	2	2	1	1	2	2	1	3	2	2	1	1	2	2	2	2	1	2	1	2	2	1
52	1B	IWB71509	12.8001	**	2	1	1	1	2	2	2	1	1	1	1	2	1	1	1	1	2	2	2	1	1	2	1	2	2	1	1	2	2	1	3	2	2	1	1	2	2	2	2	1	2	1	2	2	1
53	1B	IWB30826	12.8001	**	2	1	1	1	2	2	2	1	1	1	1	2	1	1	1	1	2	2	2	1	1	2	1	2	2	1	1	2	2	1	3	2	2	1	1	2	2	2	2	1	2	1	2	2	1
54	1B	IWB2188	12.8001	**	2	1	1	1	2	2	2	1	1	1	1	2	1	1	1	1	2	2	2	1	1	2	1	2	2	1	1	2	2	1	3	3	2	1	1	2	2	2	2	1	2	1	2	2	1
55	1B	IWB80087	12.8001	**	2	1	1	1	2	2	2	1	1	1	1	2	1	1	1	1	2	2	2	1	1	2	1	2	2	1	1	2	2	1	1	1	2	1	1	2	2	2	2	1	2	1	2	2	1
56	1B	IWB65667	12.8001	**	2	1	1	1	2	2	2	1	1	1	1	2	1	1	1	1	2	2	2	1	1	2	1	2	2	1	1	2	2	1	3	3	2	1	1	2	2	2	2	1	2	1	2	2	1
57	1B	IWB44340	12.8001	**	2	1	1	1	2	2	2	1	1	1	1	2	1	1	1	1	2	2	2	1	1	2	1	2	2	1	1	2	2	1	3	2	2	1	1	2	2	2	2	1	2	1	2	2	1
58	1B	IWB14010	12.8001	**	2	1	1	1	2	2	2	1	1	1	1	2	3	1	1	1	2	2	2	1	1	2	1	2	2	1	1	2	2	1	3	2	2	1	1	2	2	2	2	1	2	1	2	2	1
59	1B	IWB32110	12.8001	**	2	1	1	1	2	2	2	1	1	1	1	2	1	1	1	1	2	2	2	1	1	2	1	2	2	1	1	2	2	1	3	2	2	1	1	2	2	2	2	1	2	1	2	2	1
60	1B	IWB31845	12.8001	*	2	1	1	1	2	2	2	1	1	1	1	2	1	1	1	1	2	2	2	1	1	2	1	2	2	1	1	2	2	1	3	2	2	1	1	2	2	2	2	1	2	1	2	2	1
61	1B	IWB9270	12.8001	**	2	1	1	1	2	2	2	1	1	1	1	2	1	1	1	1	2	2	2	1	1	2	1	2	2	1	1	2	2	1	3	2	2	1	1	2	2	2	2	1	2	1	2	2	1
62	1B	IWB79316	12.8001	**	2	1	1	1	2	2	2	1	1	1	1	2	1	1	1	1	2	2	2	1	1	2	1	2	2	1	1	2	2	1	3	3	2	1	1	2	2	2	2	1	2	1	2	2	1
63	1B	IWB80333	12.8001	**	2	1	1	1	2	2	2	1	1	1	1	2	1	1	1	1	2	2	2	1	1	2	1	2	2	1	1	2	2	1	3	2	2	1	1	2	2	2	2	1	2	1	2	2	1
64	1B	IWB21104	12.8001	**	2	1	1	1	2	2	2	1	1	1	1	2	1	1	1	1	2	2	2	1	1	2	1	2	2	1	1	2	2	1	3	2	2	1	1	2	2	2	2	1	2	1	2	2	1
65	1B	IWB80174	12.8001	**	2	1	1	1	2	2	2	1	1	1	1	2	1	1	1	1	2	2	2	1	1	2	1	2	2	1	1	2	2	1	3	2	2	1	1	2	2	2	2	1	2	1	2	2	1
66	1B	IWB47908	12.8001	**	2	1	1	1	2	2	2	1	1	1	1	2	1	1	1	1	2	2	2	1	1	2	1	2	2	1	1	2	2	1	3	2	2	1	1	2	2	2	2	1	2	1	2	2	1
67	1B	IWB34509	12.8001	*	2	1	1	1	2	2	2	1	1	1	1	2	1	1	1	1	2	2	2	1	1	2	1	2	2	1	1	2	2	1	2	2	2	1	1	2	2	2	2	1	2	1	2	2	1
68	1B	IWB66014	12.8001	**	2	1	1	1	2	2	2	1	1	1	1	2	1	1	1	1	2	2	2	1	1	2	1	2	2	1	1	2	2	1	3	2	2	1	1	2	2	2	2	1	2	1	2	2	1
69	1B	IWB38400	12.8001	*	2	1	1	1	2	2	2	1	1	1	1	2	1	1	1	1	2	2	2	1	1	2	1	3	2	1	1	2	2	1	3	2	2	1	1	2	2	2	2	1	2	1	2	2	1
70	1B	IWB72083	12.8001	**	2	1	1	1	2	2	2	1	1	1	1	2	1	1	1	1	2	2	2	1	1	2	1	2	2	1	1	2	2	1	3	2	2	1	1	2	2	2	2	1	2	1	2	2	1
71	1B	IWB12258	13.7436	*	2	1	1	1	2	2	2	1	1	1	1	2	1	1	1	1	2	2	2	1	1	2	1	2	2	1	1	2	2	1	3	2	2	1	1	2	2	2	2	1	2	1	2	2	1
72	1B	IWB12346	13.9783	**	2	1	1	1	2	2	2	1	1	1	1	2	1	1	1	1	2	2	2	1	1	2	1	3	2	1	1	2	2	1	3	2	2	1	1	2	2	2	2	1	2	1	2	2	1
73	1B	IWB12347	13.9783	**	2	1	1	1	2	2	2	1	1	1	1	2	1	1	1	1	2	2	2	1	1	2	1	3	2	1	1	2	2	1	3	2	2	1	1	2	2	2	2	1	2	1	2	2	1
74	1B	IWB64131	13.9783	*	2	1	1	1	2	2	2	1	1	1	1	2	1	1	1	1	2	2	2	1	1	2	1	2	2	1	1	2	2	1	3	2	2	1	1	2	2	2	2	1	2	1	2	2	1
75	1B	IWB29850	14.2131	*	2	1	1	1	2	2	2	1	1	1	1	2	1	1	1	1	2	2	2	1	1	2	1	2	2	1	1	2	2	1	3	2	2	1	1	2	2	2	2	1	2	1	2	2	1
76	1B	IWB2106	14.2131	*	2	1	1	1	2	2	2	1	1	1	1	2	1	1	1	1	2	2	2	1	1	2	1	2	2	1	1	2	2	1	1	2	2	1	1	2	2	2	2	1	2	1	2	2	1
77	1B	IWB2107	14.4467	**	2	1	1	1	2	2	2	1	1	1	1	2	1	1	1	1	2	2	2	1	1	2	1	2	2	1	1	2	2	1	1	1	2	1	1	2	2	2	2	1	2	1	2	2	1
78	1B	IWB65685	14.9229	*	2	1	1	1	2	2	2	1	1	1	1	2	1	1	1	1	2	2	2	1	1	2	1	3	2	1	1	2	2	1	3	2	2	1	1	2	2	2	2	1	2	1	2	2	1
79	1B	IWB22868	15.6272	*	2	1	1	1	2	2	2	1	1	1	1	2	1	1	1	1	2	2	2	1	1	2	1	2	2	1	1	2	2	1	2	2	2	1	1	2	2	1	2	1	2	1	2	2	1
80	1B	IWB10914	15.6272	*	2	1	1	1	2	2	2	1	1	1	1	2	1	1	1	1	2	2	2	1	1	2	1	2	2	1	1	2	2	1	2	2	2	1	1	2	2	1	2	1	2	1	2	2	1
81	1B	IWB36796	15.6272	*	2	1	1	1	2	2	2	1	1	1	1	2	1	1	1	1	2	2	2	1	1	2	1	2	2	1	1	2	2	1	3	2	2	1	1	2	2	1	2	1	2	1	2	2	1
82	1B	IWB46668	15.6272	*	2	1	1	1	2	2	2	1	1	1	1	2	1	1	1	1	2	2	2	1	1	2	1	2	2	1	1	2	2	1	3	2	2	1	1	2	2	1	2	1	2	1	2	2	1
83	1B	IWB14060	15.6272	*	2	1	1	1	2	2	2	1	1	1	1	2	1	1	1	1	2	2	2	1	1	2	1	2	2	1	1	2	2	1	2	2	2	1	1	2	2	1	2	1	2	1	2	2	1
84	1B	IWB20111	15.6272	*	2	1	1	1	2	2	2	1	1	1	1	2	1	1	1	1	2	2	2	1	1	2	1	2	2	1	1	2	2	1	3	2	2	1	1	2	2	1	2	1	2	1	2	2	1
85	1B	IWB9714	15.6272	**	2	1	1	1	2	2	2	1	1	1	1	2	1	1	1	1	2	2	2	1	1	2	1	3	2	1	1	2	2	1	3	2	2	1	1	2	2	1	2	1	2	1	2	2	1
86	1B	IWB21944	15.6272	*	2	1	1	1	2	2	2	1	1	1	1	2	1	1	1	1	2	2	2	1	1	2	1	2	2	1	1	2	2	1	2	2	2	1	1	2	2	1	2	1	2	1	2	2	1
87	1B	IWB73278	15.8608	**	2	1	1	1	2	2	2	1	1	1	1	2	1	1	1	1	2	2	2	1	1	2	1	2	2	1	1	2	2	1	2	2	2	1	1	2	2	1	2	1	2	1	2	2	1
88	1B	IWB616	17.3318	**	1	1	1	1	2	2	2	3	1	1	1	2	1	1	1	1	2	2	2	1	1	2	1	2	2	1	1	2	2	1	2	3	2	3	1	2	2	1	2	1	2	1	2	2	1
89	1B	IWB73945	17.3318	**	1	1	1	1	2	2	2	1	1	1	1	2	1	1	1	1	2	2	2	1	1	2	1	2	2	1	1	2	2	1	2	1	2	1	1	2	2	1	2	1	2	1	2	2	1
90	1B	IWB56913	17.3318	**	1	1	1	1	2	2	2	1	1	1	1	2	1	1	1	1	2	2	2	1	1	2	1	2	2	1	1	2	2	1	2	1	2	1	1	2	2	1	2	1	2	1	2	2	1
91	1B	IWB72109	18.2621	**	1	1	1	1	2	2	2	1	1	1	1	2	1	1	2	1	2	2	2	1	1	2	1	2	2	1	1	2	2	1	1	1	2	1	2	2	2	1	2	1	2	1	2	2	1
92	1B	IWB72107	18.2621	**	1	1	1	1	3	2	2	1	1	1	1	2	1	1	2	1	2	2	2	1	1	2	1	2	2	1	1	2	2	1	1	3	2	1	2	2	2	1	2	1	2	1	2	2	1
93	1B	IWB8958	18.2621	**	1	1	1	1	2	2	2	1	1	1	1	2	1	1	2	1	2	2	2	1	1	2	1	2	2	1	1	2	2	1	1	1	2	1	2	2	2	1	2	1	2	1	2	2	1
94	1B	IWB3042	18.2621	**	1	1	1	1	2	2	2	1	1	1	1	2	1	1	2	1	2	2	2	1	1	2	1	2	2	1	1	2	2	1	1	1	2	1	2	2	2	1	2	1	2	1	2	2	1
95	1B	IWB42324	18.7251	**	1	1	1	1	2	2	2	1	1	1	1	2	1	1	2	1	2	2	2	1	1	2	1	2	2	1	1	2	2	1	1	1	2	1	2	2	2	1	2	1	2	1	2	2	1
96	1B	IWB17897	18.9544	**	1	1	1	1	2	2	2	1	1	1	1	2	1	1	2	1	2	2	2	1	1	2	1	2	2	1	1	2	2	1	1	1	2	1	2	2	2	1	2	1	2	1	2	2	1
97	1B	IWB12475	19.1827	**	1	1	1	2	2	2	2	1	1	1	1	2	1	1	2	1	2	2	2	1	1	2	1	2	2	1	1	2	2	1	1	1	2	1	2	2	2	1	2	1	2	1	2	2	1
98	1B	IWB9441	21.8422	***	1	1	1	2	2	2	2	1	1	1	1	2	1	1	2	1	2	2	2	1	1	2	1	2	1	1	1	2	2	1	1	1	2	2	2	2	2	1	2	1	2	1	2	2	1
99	1B	IWB71555	21.8422	***	1	1	1	2	2	2	2	1	1	1	1	2	1	1	2	1	2	2	2	1	1	2	1	2	1	1	1	2	2	1	1	1	2	2	2	2	2	1	2	1	2	1	2	2	1
100	1B	IWB80296	21.8422	***	1	1	1	2	2	2	2	1	1	1	1	2	1	1	2	1	2	2	2	1	1	2	1	2	1	1	1	2	2	1	1	1	2	2	2	2	2	1	2	1	2	1	2	2	1
101	1B	IWB78502	21.8422	***	1	1	1	2	2	2	2	1	1	1	1	2	1	1	2	1	2	2	2	1	1	2	1	2	1	1	1	2	2	1	1	1	2	2	2	2	2	1	2	1	2	1	2	2	1
102	1B	IWB58765	22.0726	***	1	1	1	2	2	2	2	1	1	1	1	2	1	1	2	1	2	2	2	1	1	2	1	2	1	1	1	2	2	1	1	1	2	2	2	2	2	1	2	1	2	1	2	2	1
103	1B	IWB25424	22.0726	***	1	1	1	2	2	2	2	1	1	1	1	2	1	1	2	1	2	2	2	1	1	2	1	2	1	1	1	2	2	1	1	1	2	2	2	2	2	1	2	1	2	1	2	2	1
104	1B	IWB34093	22.0726	***	1	1	1	2	2	2	2	1	1	1	1	2	1	1	2	1	2	2	2	1	1	2	1	2	1	1	1	2	2	1	1	3	2	2	2	2	2	1	2	1	2	1	2	2	1
105	1B	IWB22398	22.0726	***	1	1	1	2	2	2	2	1	1	1	1	2	1	1	2	1	2	2	2	1	1	2	1	2	1	1	1	2	2	1	1	1	2	2	2	3	2	1	2	1	2	1	2	2	1
106	1B	IWB57679	22.0726	***	1	1	1	2	2	2	2	1	1	1	1	2	1	1	2	1	2	2	2	1	1	2	1	2	1	1	1	2	2	1	1	1	2	2	2	2	2	1	2	1	2	1	2	2	1
107	1B	IWB64740	22.0726	***	1	1	1	2	2	2	2	1	1	1	1	2	1	1	2	1	2	2	2	1	1	2	1	2	1	1	1	2	2	1	1	1	2	2	2	2	2	1	2	1	2	1	2	2	1
108	1B	IWB10650	22.5334	***	1	1	1	2	2	2	2	1	1	1	1	2	1	1	2	1	2	2	2	1	1	2	1	2	1	1	1	2	2	1	1	1	1	2	2	2	2	1	2	1	2	1	2	2	1
109	1B	IWB72495	22.5334	***	1	1	1	2	2	2	2	1	1	1	1	2	1	1	2	1	2	2	2	1	1	2	1	2	1	1	1	2	2	1	1	1	1	2	2	2	2	1	2	1	2	1	2	2	1
110	1B	IWB75374	22.5334	***	1	1	1	2	2	2	2	1	1	1	1	2	1	1	2	1	2	2	2	1	1	2	1	2	1	1	1	2	2	1	1	1	1	2	2	2	2	1	2	1	2	1	2	2	1
111	1B	IWB53645	22.5334	***	1	1	1	2	2	2	2	1	1	1	1	2	1	1	2	1	2	2	2	1	1	2	1	2	1	1	1	2	2	1	1	1	1	2	2	2	2	1	2	1	2	1	2	2	1
112	1B	IWB64708	22.5334	***	1	1	1	2	2	2	2	1	1	1	1	2	1	1	2	1	2	2	2	1	1	2	1	2	1	1	1	2	2	1	1	1	1	2	2	2	2	1	2	1	2	1	2	2	1
113	1B	IWB75658	22.5334	***	1	1	1	2	2	2	2	1	1	1	1	2	1	1	2	1	2	2	2	1	1	2	1	2	1	1	1	2	2	1	1	1	1	2	2	2	2	1	2	1	2	1	2	2	1
114	1B	IWB73612	22.5334	***	1	1	1	2	2	2	2	1	1	1	1	2	1	1	2	1	2	2	2	1	1	2	1	2	1	1	1	2	2	1	1	1	1	2	2	2	2	1	2	1	2	1	2	2	1
115	1B	IWB72780	22.5334	***	1	1	1	2	2	2	2	1	1	1	1	2	1	1	2	1	2	2	2	1	1	2	1	2	1	1	1	2	2	1	1	1	1	2	2	2	2	1	2	1	2	1	2	2	1
116	1B	IWB31417	22.5334	***	1	1	1	2	2	2	2	1	1	1	1	2	1	1	2	1	2	2	2	1	1	2	1	2	1	1	1	2	2	1	1	1	1	2	2	2	2	1	2	1	2	1	2	2	1
117	1B	IWB74050	22.5334	***	1	1	1	2	2	2	2	1	1	1	1	2	1	1	2	1	2	2	2	1	1	2	1	2	1	1	1	2	2	1	1	1	1	2	2	2	2	1	2	1	2	1	2	2	1
118	1B	IWB35360	22.5334	***	1	1	1	2	2	2	2	1	1	1	1	2	1	1	2	1	2	2	2	1	1	2	1	3	1	1	1	2	2	1	1	1	1	2	2	2	2	1	2	1	2	1	2	2	1
119	1B	IWB72787	22.5334	***	1	1	1	2	2	2	2	1	1	1	1	2	1	1	2	1	2	2	2	1	1	2	1	2	1	1	1	2	2	1	1	1	1	2	2	2	2	1	2	1	2	1	2	2	1
120	1B	IWB67670	22.5334	***	1	1	1	2	2	2	2	1	1	1	1	2	1	1	2	1	2	2	2	1	1	2	1	2	1	1	1	2	2	1	1	1	1	2	2	2	2	1	2	1	2	1	2	2	1
121	1B	IWB18010	22.5334	***	1	1	1	2	2	2	2	1	1	1	1	2	1	1	2	1	2	2	2	1	1	2	1	2	1	1	1	2	2	1	1	1	1	2	2	2	2	1	2	1	2	1	2	2	1
122	1B	IWB72786	22.5334	***	1	1	1	2	2	2	2	1	1	1	1	2	1	1	2	1	2	2	2	1	1	2	1	3	1	1	1	2	2	1	1	1	1	2	2	2	2	1	2	1	2	1	2	2	1
123	1B	IWB67669	22.5334	****	1	1	1	2	2	2	2	1	1	1	1	2	1	1	2	1	2	2	2	1	1	2	1	2	1	1	1	2	2	1	1	1	1	2	2	2	2	1	2	1	2	1	2	3	1
124	1B	IWB71165	22.5334	****	1	1	1	2	2	2	2	1	1	1	1	3	1	1	2	1	2	2	2	1	1	2	1	2	1	1	1	2	3	1	1	1	1	2	2	2	2	1	2	1	2	1	2	2	1
125	1B	IWB17273	22.5334	***	1	1	1	2	2	2	2	1	1	1	1	2	1	1	2	1	2	2	2	1	1	2	1	2	1	1	1	2	2	1	1	3	1	2	2	2	2	1	2	1	2	1	2	2	1
126	1B	IWB72782	22.5334	***	1	1	1	2	2	2	3	1	1	1	1	2	1	1	2	1	2	2	2	1	1	2	1	2	1	1	1	2	2	1	1	3	1	2	2	2	2	1	2	1	2	1	2	2	1
127	1B	IWB42629	22.5334	***	1	1	1	2	2	2	2	1	1	1	1	2	1	1	2	1	2	2	2	1	1	2	1	2	1	1	1	2	2	1	1	1	1	2	2	2	2	1	2	1	2	1	2	2	1
128	1B	IWB69778	22.5334	***	1	1	1	2	2	2	2	1	1	1	1	2	1	1	2	1	2	2	2	1	1	2	1	2	1	1	1	2	2	1	1	1	1	2	2	2	2	1	2	1	2	1	2	2	1
129	1B	IWB9977	22.5334	***	1	1	1	2	2	2	2	1	1	1	1	2	1	1	2	1	2	2	2	1	1	2	1	2	1	1	1	2	2	1	1	1	1	2	2	2	2	1	2	1	2	1	2	2	1
130	1B	IWB70479	22.7682	***	1	1	1	2	2	2	2	1	1	1	1	2	1	1	2	1	2	2	2	1	1	2	1	2	1	1	1	2	2	1	1	3	1	2	2	2	2	1	2	1	2	1	2	2	1
131	1B	IWB72705	23.0051	***	1	1	1	2	2	2	2	1	1	1	1	2	1	1	2	1	2	2	2	1	1	2	1	3	1	1	1	2	2	1	1	1	1	2	2	2	2	1	2	1	2	1	2	2	1
132	1B	IWB9435	23.0051	***	1	1	1	2	2	2	2	1	1	1	1	2	1	1	2	1	2	2	2	1	1	2	1	2	1	1	1	2	2	1	1	1	1	2	2	2	2	1	2	1	2	1	2	2	1
133	1B	IWB81545	24.9291	****	1	1	1	2	2	1	2	1	1	1	1	2	1	1	2	1	2	2	2	1	1	2	1	2	1	1	1	2	2	1	1	1	1	2	2	2	2	1	2	1	2	1	2	2	1
134	1B	IWB21571	24.9291	****	1	1	1	2	2	1	2	1	1	1	1	2	1	1	2	1	2	2	2	1	1	2	1	2	1	1	1	2	2	1	1	1	1	2	2	2	2	1	2	1	2	1	2	2	1
135	1B	IWB9236	27.0732	*****	1	1	1	2	2	1	2	1	1	1	1	2	1	1	2	1	2	2	2	1	1	2	1	2	1	1	1	2	2	1	1	1	1	2	2	2	2	1	1	1	2	1	2	2	2
136	1B	IWB60993	27.0732	*****	1	1	1	2	2	1	2	1	1	1	1	2	1	1	2	1	2	2	2	1	1	2	1	2	1	1	1	2	2	1	1	1	1	2	2	2	2	1	1	1	2	1	2	2	2
137	1B	IWB80984	27.0732	*****	1	1	1	2	2	1	2	1	1	1	1	2	1	1	2	1	2	2	2	1	1	2	1	2	1	1	1	2	2	1	1	1	1	2	2	2	2	1	1	1	2	1	2	2	2
138	1B	IWB11695	27.0732	*****	1	1	3	2	2	1	2	1	1	1	1	2	1	1	2	1	2	2	2	1	1	2	1	2	1	1	1	2	2	1	1	1	1	2	2	2	2	1	1	1	2	1	2	2	2
139	1B	IWB63847	27.0732	****	1	1	1	2	2	1	2	1	1	1	1	2	1	1	2	1	2	2	2	1	1	2	1	2	1	1	1	2	2	1	1	3	1	2	2	2	2	1	1	1	2	1	2	2	2
140	1B	IWB9421	27.0732	****	1	1	1	2	2	1	2	1	1	1	1	2	1	1	2	1	2	2	2	1	1	2	1	2	1	1	1	2	2	1	1	3	1	2	2	2	2	1	1	1	2	1	2	2	2
141	1B	IWB21833	27.0732	****	1	1	1	2	2	1	2	1	1	1	1	2	1	1	2	1	2	2	2	1	1	2	1	2	1	1	1	2	2	1	1	3	1	2	2	2	2	1	1	1	2	1	2	2	2
142	1B	IWB33538	27.0732	****	1	1	1	2	2	1	2	1	1	1	1	2	1	1	2	1	2	2	2	1	1	2	1	2	1	1	1	2	2	1	1	1	1	2	2	2	2	1	1	1	2	1	2	2	2
143	1B	IWB73942	27.0732	****	1	1	1	2	2	1	2	1	1	1	1	2	1	1	2	1	2	2	2	1	1	2	1	2	1	1	1	2	2	1	1	1	1	2	2	2	2	1	1	1	2	1	2	2	2
144	1B	IWB9942	27.0732	*****	1	1	1	2	2	1	2	1	1	1	1	2	1	1	2	1	2	2	2	1	1	2	1	3	1	1	1	2	2	1	1	1	1	2	2	2	2	1	1	1	2	1	2	3	2
145	1B	IWB64822	27.0732	*****	1	1	1	2	2	1	2	1	1	1	1	2	1	1	2	1	2	2	2	1	1	2	1	2	1	1	1	2	2	1	1	1	1	2	2	2	2	1	1	1	2	1	2	2	2
146	1B	IWB9109	27.0732	*****	1	1	1	2	2	1	2	1	1	1	1	2	1	1	2	1	2	2	2	1	1	2	1	2	1	1	1	2	2	1	1	1	1	2	2	2	2	1	1	1	2	1	2	2	2
147	1B	IWB9420	27.0732	*****	1	1	1	2	2	1	2	1	1	1	1	2	1	1	2	1	2	2	2	1	1	2	1	2	1	1	1	2	2	1	1	1	1	2	2	2	2	1	1	1	2	1	2	2	2
148	1B	IWB8781	27.0732	*****	1	1	1	2	2	1	2	1	1	1	1	2	1	1	2	1	2	2	2	1	1	2	1	2	1	1	1	2	2	1	1	1	1	2	2	2	2	1	1	1	2	1	2	2	2
149	1B	IWB54248	27.0732	*****	1	1	1	2	3	1	2	1	1	1	1	2	1	1	2	1	2	2	2	1	1	2	1	2	1	1	1	2	2	1	1	1	1	2	2	2	2	1	1	1	2	1	2	2	2
150	1B	IWB16228	27.7709	*****	1	1	1	2	1	1	2	1	1	1	1	2	1	1	3	1	2	2	2	1	1	2	1	2	1	1	1	2	2	1	1	1	1	2	2	2	2	1	1	1	2	1	2	2	2
151	1B	IWB35982	28.2318	*****	1	1	1	2	1	1	2	1	1	1	1	2	1	1	2	1	2	2	2	1	1	2	1	2	1	1	1	2	2	1	1	1	1	2	2	2	2	1	1	1	2	1	2	2	2
152	1B	IWB9645	28.2318	*****	1	1	1	2	1	1	2	1	1	1	1	2	1	1	2	1	2	2	2	1	1	2	1	2	1	1	1	2	2	1	1	1	1	2	2	2	2	1	1	1	2	1	2	2	2
153	1B	IWB10754	28.4601	****	1	1	1	2	1	1	2	1	1	1	1	2	1	1	2	1	2	2	2	1	1	2	1	2	1	1	1	2	2	1	1	1	1	2	2	2	2	1	1	1	2	1	2	2	2
154	1B	IWB56027	28.4601	****	1	1	1	2	1	1	2	1	1	1	1	2	1	1	2	1	2	2	2	1	1	2	1	2	1	1	1	2	2	1	1	1	1	2	2	2	2	1	1	1	2	1	2	2	2
155	1B	IWB45383	28.4601	****	1	1	1	2	1	1	2	1	1	1	1	2	1	1	2	1	2	2	2	1	1	2	1	2	1	1	1	2	2	1	1	1	1	2	2	2	2	1	1	1	2	1	2	2	2
156	1B	IWB63556	28.4601	****	1	1	1	2	1	1	2	1	1	1	1	2	1	1	2	1	2	2	2	1	1	2	1	2	1	1	1	2	2	1	1	1	1	2	2	2	2	1	1	1	2	1	2	2	2
157	1B	IWB51732	28.4601	****	1	1	1	2	1	1	2	1	1	1	1	2	1	1	2	1	2	2	2	1	1	2	1	2	1	1	1	2	2	1	1	1	1	2	2	2	2	1	1	1	2	1	2	2	2
158	1B	IWB51586	28.4601	****	1	1	1	2	1	1	2	1	1	1	1	2	1	1	2	1	2	2	2	1	1	2	1	2	1	1	1	2	2	1	1	1	1	2	2	2	2	1	1	1	2	1	2	2	2
159	1B	IWB56393	28.4601	****	1	1	1	2	1	1	2	1	1	1	1	2	1	1	2	1	2	2	2	1	1	2	1	2	1	1	1	2	2	1	1	1	1	2	2	2	2	1	1	1	2	1	2	2	2
160	1B	IWB41164	28.4601	****	1	1	1	2	1	1	2	1	1	1	1	2	1	1	2	1	2	2	2	1	1	2	1	2	1	1	1	2	2	1	1	1	1	2	2	2	3	1	1	1	2	1	2	2	2
161	1B	IWB51241	28.4601	****	1	1	1	2	1	1	2	1	1	1	1	2	1	1	2	1	2	2	2	1	1	2	1	2	1	1	1	2	2	1	1	3	1	2	2	2	2	1	1	1	2	1	2	2	2
162	1B	IWB7660	28.4601	****	1	1	1	2	1	1	2	1	1	1	1	2	1	1	2	1	2	2	2	1	1	2	1	2	1	1	1	2	2	1	1	1	1	2	2	2	2	1	1	1	2	1	2	2	2
163	1B	IWB21354	28.4601	****	1	1	1	2	1	1	2	1	1	1	1	2	1	1	2	1	2	2	2	1	1	2	1	2	1	1	1	2	2	1	1	1	1	2	2	2	2	1	1	1	2	1	2	2	2
164	1B	IWB28957	28.4601	*****	1	1	1	2	1	1	2	1	1	1	1	2	1	1	2	1	2	2	2	1	1	2	1	2	1	1	1	2	2	1	1	1	1	2	2	2	2	1	1	1	2	1	2	2	2
165	1B	IWB8845	28.4601	****	1	1	1	2	1	1	2	1	1	1	1	2	1	1	2	1	2	2	2	1	1	2	1	2	1	1	1	2	2	1	1	1	1	2	2	2	2	1	1	1	2	1	2	2	2
166	1B	IWB10753	28.4601	****	1	1	1	2	1	1	2	1	1	1	1	2	1	1	2	1	2	2	2	1	1	2	1	2	1	1	1	2	2	1	1	1	1	2	2	2	2	1	1	1	2	1	2	2	2
167	1B	IWB73550	28.4601	****	1	1	1	2	1	1	2	1	1	1	1	2	1	1	2	1	2	2	2	1	1	2	1	2	1	1	1	2	2	1	1	1	1	2	2	2	2	1	1	1	2	1	2	2	2
168	1B	IWB35128	28.4601	****	1	1	1	2	1	1	2	1	1	1	1	2	1	1	2	1	2	2	2	1	1	2	1	2	1	1	1	2	2	1	1	1	1	2	2	2	2	1	1	1	2	1	2	2	2
169	1B	IWB76371	28.4601	****	1	1	1	2	1	1	2	1	1	1	1	2	1	1	2	1	2	2	2	1	1	2	1	2	1	1	1	2	2	1	1	1	1	2	2	2	2	1	1	1	2	1	2	2	2
170	1B	IWB69254	28.4601	****	1	1	1	2	1	1	2	1	1	1	1	2	1	1	2	1	2	2	2	1	1	2	1	2	1	1	1	2	2	1	1	1	1	2	2	2	2	1	1	1	2	1	2	2	2
171	1B	IWB23213	28.6894	****	1	1	1	2	1	1	2	1	1	1	1	2	1	1	2	1	2	2	2	1	1	2	1	2	1	1	1	2	2	1	1	1	1	2	2	2	2	1	1	1	2	1	2	2	2
172	1B	IWB80045	28.6894	****	1	1	1	2	1	1	2	1	1	1	1	2	1	1	2	1	2	2	2	1	1	2	1	2	1	1	1	2	2	1	1	1	1	2	2	2	2	1	1	1	2	1	2	2	2
173	1B	IWB73332	28.6894	****	1	1	1	2	1	1	2	1	1	1	1	2	1	1	2	1	2	2	2	1	1	2	1	2	1	1	1	2	2	1	1	1	1	2	2	2	2	1	1	1	2	1	2	2	2
174	1B	IWB41867	28.6894	****	1	1	1	2	1	1	2	1	1	1	1	2	1	1	2	1	2	2	2	1	1	2	1	2	1	1	1	2	2	1	1	1	1	2	2	3	2	1	1	1	2	1	2	2	2
175	1B	IWB55746	28.6894	****	1	1	1	2	1	1	2	1	1	1	1	2	1	1	2	1	2	2	2	1	1	2	1	2	1	1	1	2	2	1	1	3	1	2	2	2	2	1	1	1	2	1	2	2	2
176	1B	IWB40373	28.6894	****	1	1	1	2	1	1	2	1	1	1	1	2	1	1	2	1	2	2	2	1	1	2	1	2	1	1	1	2	2	1	1	1	1	2	2	2	2	1	1	1	2	1	2	2	2
177	1B	IWB60710	28.6894	****	1	1	1	2	1	1	2	1	1	1	1	2	1	1	2	1	2	2	2	1	1	2	1	2	1	1	1	2	2	1	1	1	1	2	2	2	2	1	1	1	2	1	2	2	2
178	1B	IWB28269	28.6894	****	1	1	1	2	1	1	2	1	1	1	1	2	1	1	2	1	2	2	2	1	1	2	1	2	1	1	1	2	2	1	1	1	1	2	2	2	2	1	1	1	2	1	2	2	2
179	1B	IWB80044	28.6894	****	1	1	1	2	1	1	2	1	1	1	1	2	1	1	2	1	2	2	2	1	1	2	1	2	1	1	1	2	2	1	1	1	1	2	2	2	2	1	1	1	2	1	2	2	2
180	1B	IWB60713	28.6894	****	1	1	1	2	1	1	2	1	1	1	1	2	1	1	2	1	2	2	2	1	1	2	1	2	1	1	1	2	2	1	1	1	1	2	2	2	2	1	1	1	2	1	2	2	2
181	1B	IWB60711	28.6894	****	1	1	1	2	1	1	2	1	1	1	1	2	1	1	2	1	2	2	2	1	1	2	1	2	1	1	1	2	2	1	1	1	1	2	2	2	2	1	1	1	2	1	2	2	2
182	1B	IWB35406	28.6894	****	1	1	1	2	1	1	2	1	1	1	1	2	1	1	2	1	2	2	2	1	1	2	1	2	1	1	1	2	2	1	1	1	1	2	2	2	2	1	1	1	2	1	2	2	2
183	1B	IWB12562	28.6894	****	1	1	1	2	1	1	2	1	1	1	1	2	1	1	2	1	2	2	2	1	1	2	1	2	1	1	1	2	2	1	1	1	1	2	2	2	2	1	1	1	2	1	2	2	2
184	1B	IWB63352	28.6894	****	1	1	1	2	1	1	2	1	1	1	1	2	1	1	2	1	2	2	2	1	1	2	1	2	1	1	1	2	2	1	1	1	1	2	2	2	2	1	1	1	2	1	2	2	2
185	1B	IWB35375	28.6894	****	1	1	1	2	1	1	2	1	1	1	1	2	1	1	2	1	2	2	2	1	1	2	1	2	1	1	1	2	2	1	1	1	1	2	2	2	2	1	1	1	2	1	2	2	2
186	1B	IWB24659	28.6894	****	1	1	1	2	1	1	2	1	1	1	1	2	1	1	2	1	2	2	2	1	1	2	1	2	1	1	1	2	2	1	1	1	1	2	2	2	2	1	1	1	2	1	2	2	2
187	1B	IWB25554	29.6197	****	1	1	1	2	1	1	2	1	1	1	1	2	1	1	2	1	2	2	2	1	1	2	1	2	1	1	1	2	2	1	1	1	1	2	2	2	2	1	1	1	2	1	2	2	2
188	1B	IWB76085	29.6197	***	1	1	1	2	1	1	2	1	1	1	1	2	1	1	2	1	2	2	2	1	1	2	1	2	1	1	1	2	2	1	1	1	1	2	2	2	2	1	1	1	2	1	2	2	2
189	1B	IWB22930	29.8545	***	1	1	1	2	1	1	2	1	1	2	1	2	1	1	2	1	2	2	2	1	1	2	1	3	1	1	1	2	2	1	1	1	1	2	2	2	2	1	1	1	2	1	2	2	2
190	1B	IWB61882	29.8545	***	1	1	1	2	1	1	2	1	1	2	1	2	1	1	2	1	2	2	2	1	1	2	1	2	1	1	1	2	2	1	1	3	1	2	2	2	2	1	1	1	2	1	2	2	2
191	1B	IWB15085	29.8545	***	1	1	1	2	1	1	2	1	1	2	1	2	1	1	2	1	2	2	2	1	1	2	1	2	1	1	1	2	2	1	1	3	1	2	2	2	2	1	1	1	2	1	2	2	2
192	1B	IWB9695	29.8545	****	1	1	1	2	1	1	2	1	1	2	1	2	1	1	2	1	2	2	2	1	1	2	1	3	1	1	1	2	2	1	1	1	1	2	2	2	2	1	1	1	2	3	2	2	2
193	1B	IWB46047	29.8545	***	1	1	1	2	1	1	2	1	1	2	1	2	1	1	2	1	2	2	2	1	1	2	1	3	1	1	1	2	2	1	1	3	1	2	2	2	2	1	1	1	2	2	2	2	2
194	1B	IWB55370	29.8545	***	1	1	1	2	1	1	2	1	1	2	1	2	1	1	2	1	2	2	2	1	1	2	1	2	1	1	1	2	2	1	1	1	1	2	3	2	2	1	1	1	2	2	2	2	2
195	1B	IWB7169	29.8545	****	1	1	1	2	1	1	2	1	1	2	1	2	1	1	2	1	2	2	2	1	1	2	1	2	1	1	1	2	2	1	1	1	1	2	2	3	2	1	1	1	2	2	2	2	2
196	1B	IWB7982	29.8545	***	1	1	1	2	1	1	2	1	1	2	1	2	1	1	2	1	2	2	2	1	1	2	1	3	1	1	1	2	2	1	1	1	1	2	3	2	2	1	1	1	2	2	2	2	2
197	1B	IWB48274	29.8545	***	1	1	1	2	1	1	2	1	1	2	1	2	1	1	2	1	2	2	2	1	1	2	1	2	1	1	1	2	2	1	1	1	1	2	2	2	2	1	1	1	2	2	3	2	2
198	1B	IWB62610	29.8545	***	1	1	1	2	1	1	2	1	1	2	1	2	1	1	2	1	2	2	2	1	1	2	1	2	1	1	1	2	2	1	1	1	1	2	2	2	2	1	1	1	2	2	2	2	2
199	1B	IWB27824	29.8545	***	1	1	1	2	1	1	2	1	1	2	1	2	1	1	2	1	2	2	2	1	1	2	1	2	1	1	1	2	2	1	1	1	1	2	2	2	2	1	1	1	2	2	2	2	2
200	1B	IWB60559	30.5522	****	1	1	1	2	1	1	2	1	1	2	1	2	1	1	2	1	2	2	2	1	1	2	1	2	1	1	1	2	2	1	1	3	1	2	2	2	2	1	1	1	2	2	2	2	2
201	1B	IWB69726	31.0152	***	1	2	1	2	1	1	2	1	1	2	1	2	1	1	2	1	2	2	2	1	1	2	1	2	1	1	1	2	2	1	1	1	1	2	2	2	2	1	1	1	2	2	2	2	2
202	1B	IWB7004	31.0152	***	1	2	1	2	1	1	2	1	1	2	1	2	1	1	2	1	2	2	2	1	1	2	1	2	1	1	1	2	2	1	1	1	1	2	2	2	2	1	1	1	2	2	2	2	2
203	1B	IWB7314	31.0152	***	1	2	1	2	1	1	2	1	1	2	1	2	1	1	2	1	2	2	2	1	1	2	1	2	1	1	1	2	2	1	1	1	1	2	2	2	2	1	1	1	2	2	2	2	2
204	1B	IWB66182	31.0152	***	1	2	1	2	1	1	2	1	1	2	1	2	1	1	2	1	2	2	2	1	1	2	1	2	1	1	1	2	2	1	1	1	1	2	2	2	2	1	1	1	2	2	2	2	2
205	1B	IWB8726	31.0152	***	1	2	1	2	1	1	2	1	1	2	1	2	1	1	2	1	2	2	2	1	1	2	1	2	1	1	1	2	2	1	1	1	1	2	2	2	2	1	1	1	2	2	2	2	2
206	1B	IWB8866	31.0152	***	1	2	1	2	1	1	2	1	1	2	1	2	1	1	2	1	2	2	2	1	1	2	1	2	1	1	1	2	2	1	1	1	1	2	2	2	2	1	1	1	2	2	2	2	2
207	1B	IWB10008	31.0152	***	1	2	1	2	1	1	2	1	1	2	1	2	1	1	2	1	2	2	2	1	1	2	1	2	1	1	1	2	2	1	1	1	1	2	2	2	2	1	1	1	2	2	2	2	2
208	1B	IWB11309	31.0152	***	1	2	1	2	1	1	2	1	1	2	1	2	1	1	2	1	2	2	2	1	1	2	1	2	1	1	1	2	2	1	1	1	1	2	2	2	2	1	1	1	2	2	2	2	2
209	1B	IWB46756	31.0152	***	1	2	1	2	1	1	2	1	1	2	1	2	1	1	2	1	2	2	2	1	1	2	1	2	1	1	1	2	2	1	1	1	1	2	2	2	2	1	1	1	2	2	2	2	2
210	1B	IWB2579	31.0152	***	1	2	1	2	1	1	2	1	1	2	1	2	1	1	2	1	2	2	2	1	1	2	1	2	1	1	1	2	2	1	1	3	1	2	2	2	2	1	1	1	2	2	2	2	2
211	1B	IWB66183	31.0152	***	1	2	1	2	1	1	2	1	1	2	1	2	1	1	2	1	2	2	2	1	1	2	1	2	1	1	1	2	2	1	1	1	1	2	2	2	2	1	1	1	2	2	2	2	2
212	1B	IWB44280	31.0152	***	1	2	1	2	1	1	2	1	1	2	1	2	1	1	2	1	2	2	2	1	1	2	1	2	1	1	1	2	2	1	1	3	1	2	2	2	2	1	1	1	2	2	2	2	2
213	1B	IWB7321	31.0152	***	1	2	1	2	1	1	2	1	1	2	1	2	1	1	2	1	2	2	2	1	1	2	1	2	1	1	1	2	2	1	1	1	1	2	2	2	2	1	1	1	2	2	2	2	2
214	1B	IWB7813	31.9498	***	1	2	1	2	1	1	2	1	1	2	1	2	1	1	2	1	2	2	2	1	1	2	1	2	1	1	1	2	2	1	1	1	1	2	2	2	2	1	1	1	2	2	2	2	2
215	1B	IWB8875	37.7345	**	1	2	1	2	1	1	1	1	1	2	1	1	1	1	2	1	2	2	2	2	1	1	1	2	1	1	1	2	2	1	1	1	2	2	1	2	2	1	1	1	2	2	2	2	2
216	1B	IWB12387	37.9703	**	1	2	1	2	1	1	1	1	1	2	1	1	1	1	2	1	2	2	2	2	1	1	1	2	1	1	1	2	2	1	1	1	2	2	1	2	2	1	1	1	2	2	2	2	1
217	1B	IWB42013	38.2018	***	1	2	1	2	1	1	1	1	1	2	1	1	1	1	2	1	2	2	2	2	1	1	1	2	1	1	1	2	2	1	1	1	2	2	1	2	2	1	1	1	2	2	2	2	1
218	1B	IWB43365	38.2018	***	1	2	1	2	1	1	1	1	1	2	1	1	1	1	2	1	2	2	2	2	1	1	1	2	1	1	1	2	2	1	1	1	2	2	1	2	2	1	1	1	2	2	2	2	1
219	1B	IWB52449	38.2018	***	1	2	1	2	1	1	1	1	1	2	1	1	1	1	2	1	2	2	2	2	1	1	1	2	1	1	1	2	2	1	1	1	2	2	1	2	2	1	1	1	2	2	2	2	1
220	1B	IWB76361	38.2018	***	1	2	1	2	1	1	1	1	1	2	1	1	1	1	2	1	2	2	2	2	1	1	1	2	1	1	1	2	2	1	1	1	2	2	1	2	2	1	1	1	2	2	2	2	1
221	1B	IWB39667	38.2018	***	1	2	1	2	1	1	1	1	1	2	1	1	1	1	2	1	2	2	2	2	1	1	1	2	1	1	1	2	2	1	1	1	2	2	1	2	2	1	1	1	2	2	2	2	1
222	1B	IWB11930	38.2018	***	1	2	1	2	1	1	1	1	1	2	1	1	1	1	2	1	2	2	2	2	1	1	1	2	1	1	1	2	2	1	1	1	2	2	1	2	2	1	1	1	2	2	2	2	1
223	1B	IWB56246	38.2018	***	1	2	1	2	1	1	1	1	1	2	1	1	1	1	2	1	2	2	2	2	1	1	1	2	1	1	1	2	2	1	1	1	2	2	1	2	2	1	1	1	2	2	2	2	1
224	1B	IWB46851	38.2018	***	1	2	1	2	1	1	1	1	1	2	1	1	1	1	2	1	2	2	2	2	1	1	1	2	1	1	1	2	2	1	1	1	2	2	1	2	2	1	1	1	2	2	2	2	1
225	1B	IWB42926	38.2018	***	1	2	1	2	1	1	1	1	1	2	1	1	1	1	2	1	2	2	2	2	1	1	1	2	1	1	1	2	2	1	1	1	2	2	1	2	2	1	1	1	2	2	2	2	1
226	1B	IWB11458	38.2018	***	1	2	1	2	1	1	1	1	1	2	1	1	1	1	2	1	2	2	2	2	1	1	1	2	1	1	1	2	2	1	1	1	2	2	1	2	2	1	1	1	2	2	2	2	1
227	1B	IWB34864	38.2018	***	1	2	1	2	1	1	1	1	1	2	1	1	1	1	2	1	2	2	2	2	1	1	1	2	1	1	1	2	2	1	1	1	2	2	1	2	2	1	1	1	2	2	2	2	1
228	1B	IWB80169	38.2018	***	1	2	1	2	1	1	1	1	1	2	1	1	1	1	2	1	2	2	2	2	1	1	1	2	1	1	1	2	2	1	1	1	2	2	1	2	2	1	1	1	2	2	2	2	1
229	1B	IWB52450	38.2018	**	1	2	1	2	1	1	1	1	1	2	1	1	1	1	2	1	2	2	2	2	1	1	1	2	1	1	1	2	2	1	1	1	2	2	1	2	2	1	1	1	2	2	2	2	1
230	1B	IWB75837	38.2018	**	1	2	1	2	1	1	1	1	1	2	1	1	1	1	2	1	2	2	2	2	1	1	1	2	1	1	1	2	2	1	1	3	2	2	1	2	2	1	1	1	2	2	2	2	1
231	1B	IWB49541	38.2018	**	1	2	1	2	1	1	1	1	1	2	1	1	1	1	2	1	2	2	2	2	1	1	1	2	1	1	1	2	2	1	1	3	2	2	1	2	2	1	1	1	2	2	2	2	1
232	1B	IWB5791	38.2018	**	1	2	1	2	1	1	1	1	1	2	1	1	1	1	2	1	2	2	2	2	1	1	1	2	1	1	1	2	2	1	1	3	2	2	1	2	2	1	1	1	2	2	2	2	1
233	1B	IWB10085	38.2018	**	1	2	1	2	1	1	1	1	1	2	1	1	1	1	2	1	2	2	2	2	1	1	1	2	1	1	1	2	2	1	1	3	2	2	1	2	2	1	1	1	2	2	2	2	1
234	1B	IWB52544	38.2018	**	1	2	1	2	1	1	1	1	1	2	1	1	1	1	2	1	2	2	2	2	1	1	1	2	1	1	1	2	2	1	1	3	2	2	1	2	2	1	1	1	2	2	2	2	1
235	1B	IWB11931	38.2018	***	1	2	1	2	1	1	1	1	1	2	1	1	1	1	2	1	2	2	2	2	1	1	1	2	1	1	1	2	2	1	1	1	2	2	1	2	2	1	1	1	2	2	2	2	1
236	1B	IWB6102	38.4322	***	1	2	1	2	1	1	1	1	1	2	1	1	1	1	2	1	2	2	2	2	1	1	1	2	1	1	1	2	2	1	1	1	2	2	1	2	2	1	1	1	2	2	2	2	1
237	1B	IWB27768	38.4322	***	1	2	1	2	1	1	1	1	1	2	1	1	1	1	2	1	2	2	2	2	1	1	1	2	1	1	1	2	2	1	1	1	2	2	1	2	2	1	1	1	2	2	2	2	1
238	1B	IWB55829	38.4322	***	1	2	1	2	1	1	1	1	1	2	1	1	1	1	2	1	2	2	2	2	1	1	1	2	1	1	1	2	2	1	1	1	2	2	1	2	2	1	1	1	2	2	2	2	1
239	1B	IWB62506	38.4322	***	1	2	1	2	1	1	1	1	1	2	1	1	1	1	2	1	2	2	2	2	1	1	1	2	1	1	1	2	2	1	1	1	2	2	1	2	2	1	1	1	2	2	2	2	1
240	1B	IWB68891	38.4322	***	1	2	1	2	1	1	1	1	1	2	1	1	1	1	2	1	2	2	2	2	1	1	1	2	1	1	1	2	2	1	1	1	2	2	1	2	2	1	1	1	2	2	2	2	1
241	1B	IWB13048	38.4322	**	1	2	1	2	1	1	1	1	1	2	1	1	1	1	2	1	2	2	2	2	1	1	1	2	1	1	1	2	2	1	1	3	2	2	1	2	2	1	1	1	2	2	2	2	1
242	1B	IWB38258	38.4322	***	1	2	1	2	1	1	1	1	1	2	1	1	1	1	2	1	2	2	2	2	1	1	1	2	1	1	1	2	2	1	1	3	2	2	1	2	2	1	1	1	2	2	2	2	1
243	1B	IWB7214	38.4322	***	1	2	1	2	3	1	1	1	1	2	1	1	1	1	2	1	2	2	2	2	1	1	1	2	1	1	1	2	2	1	1	1	2	2	1	2	3	1	1	1	2	2	2	2	1
244	1B	IWB80719	38.4322	***	1	2	1	2	1	1	1	1	1	2	1	1	1	1	2	1	2	2	2	2	1	1	1	2	1	1	1	2	2	1	1	1	2	2	1	2	2	1	1	1	2	2	2	2	1
245	1B	IWB7193	38.4322	***	1	2	1	2	1	1	1	1	1	2	1	1	1	1	2	1	2	2	2	2	1	1	1	2	1	1	1	2	2	1	1	1	2	2	1	2	2	1	1	1	2	2	2	2	1
246	1B	IWB61004	39.1332	**	1	2	1	2	1	1	1	1	1	2	1	1	1	1	2	1	2	2	2	2	1	1	1	2	1	2	1	2	2	1	1	1	2	2	1	2	2	1	1	1	2	2	2	2	1
247	1B	IWB11820	39.1332	**	1	2	1	2	1	1	1	1	1	2	1	1	1	1	2	1	2	2	2	2	1	1	1	3	1	2	1	2	2	1	1	1	2	2	1	2	2	1	1	1	2	2	2	2	1
248	1B	IWB34561	39.1332	**	1	2	1	2	1	1	1	1	1	2	1	1	1	1	2	1	2	2	2	2	1	1	1	2	1	2	1	2	2	1	1	1	2	2	1	2	2	1	1	1	2	2	2	2	1
249	1B	IWB6592	39.1332	**	1	2	1	2	1	1	1	1	1	2	1	1	1	1	2	1	2	2	2	2	1	1	1	2	1	2	1	2	2	1	1	1	2	2	1	2	2	1	1	1	2	2	2	2	1
250	1B	IWB11819	39.1332	**	1	2	1	2	1	1	1	1	1	2	1	1	1	1	2	1	2	2	2	2	1	1	1	2	1	2	1	2	2	1	1	1	2	2	1	2	2	1	1	1	2	2	2	2	1
251	1B	IWB7149	39.1332	**	1	2	1	2	1	1	1	1	1	2	1	1	1	1	2	1	2	2	2	2	1	1	1	2	1	2	1	2	2	1	1	1	2	2	1	2	2	1	1	1	2	2	2	2	1
252	1B	IWB60932	39.3647	**	1	2	1	2	1	1	1	1	1	2	1	1	1	1	2	1	2	2	2	2	1	1	1	2	1	2	1	2	2	1	1	1	2	2	1	2	2	1	1	1	2	2	2	2	1
253	1B	IWB70181	39.3647	**	1	2	1	2	1	1	1	1	1	2	1	1	1	1	2	1	2	2	2	2	1	1	1	2	1	2	1	2	2	1	1	1	2	2	1	2	2	1	1	1	2	2	2	2	1
254	1B	IWB46929	39.3647	**	1	2	1	2	1	1	1	1	1	2	1	1	1	1	2	1	2	2	2	2	1	1	1	2	1	2	1	2	2	1	1	1	2	2	1	2	2	1	1	1	2	2	2	2	1
255	1B	IWB10636	39.3647	**	1	2	1	2	1	1	1	1	1	2	1	1	1	1	2	1	2	2	2	2	1	1	1	2	1	2	1	2	2	1	1	1	2	2	1	2	2	1	1	1	2	2	2	2	1
256	1B	IWB4598	39.3647	**	1	2	1	2	1	1	1	1	1	2	1	1	1	1	2	1	2	2	2	2	1	1	1	2	1	2	1	2	2	1	1	1	2	2	1	2	2	1	1	1	2	2	2	2	1
257	1B	IWB44383	39.3647	**	1	2	1	2	1	1	1	1	1	2	1	1	1	1	2	1	2	2	2	2	1	1	1	2	1	2	1	2	2	1	1	1	2	2	1	2	2	1	1	1	2	2	2	2	1
258	1B	IWB22289	39.3647	**	1	2	1	2	1	1	1	1	1	2	1	1	1	1	2	1	2	2	2	2	1	1	1	2	1	2	1	2	2	1	1	1	2	2	1	2	2	1	1	1	2	2	2	2	1
259	1B	IWB58776	39.3647	**	1	2	1	2	1	1	1	1	1	2	1	1	1	1	2	1	2	2	2	2	1	1	1	2	1	2	1	2	2	1	1	1	2	2	1	2	2	1	1	1	2	2	2	2	1
260	1B	IWB51154	39.3647	**	1	2	1	2	1	1	1	1	1	2	1	1	1	1	2	1	2	2	2	2	1	1	1	3	1	2	1	2	2	1	1	1	2	2	1	2	2	1	1	1	2	2	2	2	1
261	1B	IWB6324	39.3647	**	1	2	1	2	1	1	1	1	1	2	1	1	1	1	2	1	2	2	2	2	1	1	1	2	1	2	1	2	2	1	1	1	2	2	1	2	2	1	1	1	2	2	2	2	1
262	1B	IWB60134	39.5972	**	1	2	1	2	1	1	1	1	1	2	1	1	1	1	2	1	2	2	2	2	1	1	1	2	1	2	1	2	2	1	1	1	2	2	1	2	2	1	1	1	2	2	2	2	1
263	1B	IWB9083	39.8287	**	1	2	1	2	1	1	1	1	1	2	1	1	1	1	2	1	2	2	2	2	1	1	1	2	1	2	1	2	2	1	1	1	2	2	1	2	2	1	1	1	2	2	2	2	1
264	1B	IWB5835	39.8287	**	1	2	1	2	1	1	1	1	1	2	1	1	1	1	2	1	2	2	2	2	1	1	1	2	1	2	1	2	2	1	1	1	2	2	1	2	2	1	1	1	2	2	2	2	1
265	1B	IWB10333	39.8287	**	1	2	1	2	1	1	1	1	1	2	1	1	1	1	2	1	2	2	2	2	1	1	1	2	1	2	1	2	2	1	1	1	2	2	1	2	2	1	1	1	2	2	2	2	1
266	1B	IWB12000	39.8287	**	1	2	1	2	1	1	1	1	1	2	1	1	1	1	2	1	2	2	2	2	1	1	1	2	1	2	1	2	2	1	1	1	2	2	1	2	2	1	1	1	2	2	2	2	1
267	1B	IWB36003	39.8287	**	1	2	1	2	1	1	1	1	1	2	1	1	1	1	2	1	2	2	2	2	1	1	1	2	1	2	1	2	2	1	1	1	2	2	1	2	2	1	1	1	2	2	2	2	1
268	1B	IWB9107	39.8287	**	1	2	1	2	1	1	1	1	1	2	1	1	1	1	2	1	2	2	2	2	1	1	1	2	1	2	1	2	2	1	1	1	2	2	1	2	2	1	1	1	2	2	2	2	1
269	1B	IWB66013	39.8287	**	1	2	1	2	1	1	1	1	1	2	1	1	1	1	2	1	2	2	2	2	1	1	1	2	1	2	1	2	2	1	1	1	2	2	1	2	2	1	1	1	2	2	2	2	1
270	1B	IWB6304	39.8287	**	1	2	1	2	1	1	1	1	1	2	1	1	1	1	2	1	2	2	2	2	1	1	1	2	1	2	1	2	2	1	1	1	2	2	1	2	2	1	1	1	2	2	2	2	1
271	1B	IWB9456	39.8287	**	1	2	1	2	1	1	1	1	1	2	1	1	1	1	2	1	2	2	2	2	1	1	1	2	1	2	1	2	2	1	1	1	2	2	1	2	2	1	1	1	2	2	2	2	1
272	1B	IWB8023	39.8287	**	1	2	1	2	1	1	1	1	1	2	1	1	1	1	2	1	2	2	2	2	1	1	1	2	1	2	1	2	2	1	1	1	2	2	1	2	2	1	1	1	2	2	2	2	1
273	1B	IWB10269	39.8287	**	1	2	1	2	1	1	1	1	1	2	1	1	1	1	2	1	2	2	2	2	1	1	1	3	1	2	1	2	2	1	1	1	2	2	1	2	2	1	1	1	2	2	2	2	1
274	1B	IWB10699	39.8287	**	1	2	1	2	1	1	1	1	1	2	1	1	1	1	2	1	2	2	2	2	1	1	1	3	1	2	1	2	2	1	1	1	2	2	1	2	2	1	1	1	2	2	2	2	1
275	1B	IWB11664	39.8287	**	1	2	1	2	1	1	1	1	1	2	1	1	1	1	2	1	2	2	2	2	1	1	1	2	1	2	1	2	2	1	1	1	2	2	1	2	2	1	1	1	2	2	2	2	1
276	1B	IWB6972	39.8287	*	1	2	1	2	1	1	1	1	1	2	1	1	1	1	2	1	2	2	2	2	1	1	1	2	1	2	1	2	2	1	1	1	2	2	1	2	2	1	1	1	2	2	2	2	1
277	1B	IWB34046	39.8287	**	1	2	1	2	1	1	1	1	1	2	1	1	1	1	2	1	2	2	2	2	1	1	1	2	1	2	1	2	2	1	1	3	2	2	1	2	2	1	1	1	2	2	2	2	1
278	1B	IWB9464	39.8287	**	1	2	1	2	1	1	1	1	1	2	1	1	1	1	2	1	2	2	2	2	1	1	1	2	1	2	1	2	2	1	1	1	2	2	1	2	2	1	3	1	2	2	2	2	1
279	1B	IWB58524	39.8287	*	1	2	1	2	1	1	1	1	1	2	1	1	1	1	2	1	2	2	2	2	1	1	1	2	1	2	1	2	2	1	1	3	2	2	1	2	2	1	2	1	2	2	2	2	1
280	1B	IWB34993	39.8287	*	1	2	1	2	1	1	1	1	1	2	1	1	1	1	2	1	2	2	2	2	1	1	1	2	1	2	1	2	2	1	1	1	2	2	1	2	2	1	2	1	2	2	2	2	1
281	1B	IWB12288	39.8287	*	1	2	1	2	1	1	1	1	1	2	1	1	1	1	2	1	2	2	2	2	1	1	1	2	1	2	1	2	2	1	1	1	2	2	1	2	2	1	2	1	2	2	2	2	1
282	1B	IWB8300	39.8287	*	1	2	1	2	1	1	1	1	1	2	1	1	1	1	2	1	2	2	2	2	1	1	1	2	1	2	1	2	2	1	1	1	2	2	1	2	2	1	2	1	2	2	2	2	1
283	1B	IWB6588	39.8287	**	1	2	1	2	1	1	1	1	1	2	1	1	1	1	2	1	2	2	2	2	1	1	1	2	1	2	1	2	2	1	1	1	2	2	1	2	2	1	2	1	2	2	2	2	1
284	1B	IWB5323	39.8287	**	1	2	1	2	1	1	1	1	1	2	1	1	1	1	2	1	2	2	2	2	1	1	1	2	1	2	1	2	2	1	1	1	2	2	1	2	2	1	2	1	2	2	2	2	1
285	1B	IWB57973	40.0591	**	1	2	1	2	1	1	1	1	1	2	1	1	1	1	2	1	2	2	2	2	1	1	1	2	1	2	1	2	2	1	1	1	2	2	1	2	2	1	2	1	2	2	2	2	1
286	1B	IWB31006	40.0591	**	1	2	1	2	1	1	1	1	1	2	1	1	1	1	2	1	2	2	2	2	1	1	1	2	1	2	1	2	2	1	1	1	2	2	1	2	2	1	2	1	2	2	2	2	1
287	1B	IWB12472	40.0591	**	1	2	1	2	1	1	1	1	1	2	1	1	1	1	2	1	2	2	2	2	1	1	1	2	1	2	1	2	2	1	1	1	2	2	1	2	2	1	2	1	2	2	2	2	1
288	1B	IWB8329	40.0591	**	1	2	1	2	1	1	1	1	1	2	1	1	1	1	2	1	2	2	2	2	1	1	1	2	1	2	1	2	2	1	1	1	2	2	1	2	2	1	2	1	2	2	2	2	1
289	1B	IWB7369	40.0591	**	1	2	1	2	1	1	1	1	1	2	1	1	1	1	2	1	2	2	2	2	1	1	1	2	1	2	1	2	2	1	1	1	2	2	1	2	2	1	2	1	2	2	2	2	1
290	1B	IWB7021	40.0591	**	1	2	1	2	1	1	1	1	1	2	1	1	1	1	2	1	2	2	2	2	1	1	1	2	1	2	1	2	2	1	1	1	2	2	1	2	2	1	2	1	2	2	2	2	1
291	1B	IWB67856	40.0591	**	1	2	1	2	1	1	1	1	1	2	1	1	1	1	2	1	2	2	2	2	1	1	1	2	1	2	1	2	2	1	1	1	2	2	1	2	2	1	2	1	2	2	2	2	1
292	1B	IWB36294	40.0591	**	1	2	1	2	1	1	1	1	1	2	1	1	1	1	2	1	2	2	2	2	1	1	1	2	1	2	1	2	2	1	1	1	2	2	1	2	2	1	2	1	2	2	2	2	1
293	1B	IWB41306	40.0591	**	1	2	1	2	1	1	1	1	1	2	1	1	1	1	2	1	2	2	2	2	1	1	1	2	1	2	1	2	2	1	1	1	2	2	1	2	2	1	2	1	2	2	2	2	1
294	1B	IWB6137	40.0591	**	1	2	1	2	1	1	1	1	1	2	1	1	1	1	2	1	2	2	2	2	1	1	1	2	1	2	1	2	2	1	1	1	2	2	1	2	2	1	2	1	2	2	2	2	1
295	1B	IWB25023	40.0591	*	1	2	1	2	1	1	1	1	1	2	1	1	1	1	2	1	2	2	2	2	1	1	1	2	1	2	1	2	2	1	1	1	2	2	1	2	2	1	2	1	2	2	2	2	1
296	1B	IWB34783	40.0591	*	1	2	1	2	1	1	1	1	1	2	1	1	1	1	2	1	2	2	2	2	1	1	1	2	1	2	1	2	2	1	1	3	2	2	1	2	2	1	2	1	2	2	2	2	1
297	1B	IWB10134	40.0591	*	1	2	1	2	1	1	1	1	1	2	1	1	1	1	2	1	2	2	2	2	1	1	1	3	1	2	1	2	2	1	1	3	2	2	1	2	2	1	2	1	2	2	2	2	1
298	1B	IWB18084	40.0591	**	1	2	1	2	1	1	1	1	1	2	1	1	1	1	2	1	2	2	2	2	1	1	1	2	1	2	1	2	2	1	1	1	2	2	1	2	2	1	2	1	2	2	2	2	1
299	1B	IWB28335	40.5331	**	1	2	1	2	1	1	1	1	1	2	1	1	1	1	2	1	2	2	2	2	1	1	1	2	1	2	1	2	2	1	1	3	2	2	1	2	2	1	2	1	2	2	2	2	1
300	1B	IWB14738	40.7689	**	1	2	1	2	1	1	1	1	1	2	1	1	1	1	2	1	2	2	2	2	1	1	1	2	1	2	1	2	2	1	1	1	2	2	1	2	2	1	2	1	2	2	2	2	1
301	1B	IWB7485	40.7689	**	1	2	1	2	1	1	1	1	1	2	1	1	1	1	2	1	2	2	2	2	1	1	1	2	1	2	1	2	2	1	1	1	2	2	1	2	2	1	2	1	2	2	2	2	1
302	1B	IWB8585	40.7689	**	1	2	1	2	1	1	1	1	1	2	1	1	1	1	2	1	2	2	2	2	1	1	1	2	1	2	1	2	2	1	1	1	2	2	1	2	2	1	2	1	2	2	2	2	1
303	1B	IWB10660	40.7689	**	1	2	1	2	1	1	1	1	1	2	1	1	1	1	2	1	2	2	2	2	1	1	1	2	1	2	1	2	2	1	1	1	2	2	1	2	2	1	2	1	2	2	2	2	1
304	1B	IWB58936	40.7689	**	1	2	1	2	1	1	1	1	1	2	1	1	1	1	2	1	2	2	2	2	1	1	1	2	1	2	1	2	2	1	1	1	2	2	1	2	2	1	2	1	2	2	2	2	1
305	1B	IWB8920	40.7689	**	1	2	1	2	1	1	1	1	1	2	1	1	1	1	2	1	2	2	2	2	1	1	1	2	1	2	1	2	2	1	1	1	2	2	1	2	2	1	2	1	2	2	2	2	1
306	1B	IWB37306	40.7689	**	1	2	1	2	1	1	1	1	1	2	1	1	1	1	2	1	2	2	2	2	1	1	1	2	1	2	1	2	2	1	1	1	2	2	1	2	2	1	2	1	2	2	2	2	1
307	1B	IWB9700	40.7689	**	1	2	1	2	1	1	1	1	1	2	1	1	1	1	2	1	2	2	2	2	1	1	1	2	1	2	1	2	2	1	1	1	2	2	1	2	2	1	2	1	2	2	2	2	1
308	1B	IWB10923	40.7689	**	1	2	1	2	1	1	1	1	1	2	1	1	1	1	2	1	2	2	2	2	1	1	1	2	1	2	1	2	2	1	1	1	2	2	1	2	2	1	2	1	2	2	2	2	1
309	1B	IWB58569	40.7689	**	1	2	1	2	1	1	1	1	1	2	1	1	1	1	2	1	2	2	2	2	1	1	1	2	1	2	1	2	2	1	1	1	2	2	1	2	2	1	2	1	2	2	2	2	1
310	1B	IWB66125	40.7689	**	1	2	1	2	1	1	1	1	1	2	1	1	1	1	2	1	2	2	2	2	1	1	1	2	1	2	1	2	2	1	1	1	2	2	1	2	2	1	2	1	2	2	2	2	1
311	1B	IWB75203	40.7689	**	1	2	1	2	1	1	1	1	1	2	1	1	1	1	2	1	2	2	2	2	1	1	1	2	1	2	1	2	2	1	1	3	2	2	1	2	2	1	2	1	2	2	2	2	1
312	1B	IWB79803	40.7689	**	1	2	1	2	1	1	1	1	1	2	1	1	1	1	2	1	2	2	2	2	1	1	1	2	1	2	1	2	2	1	1	3	2	2	1	2	2	1	2	1	2	2	2	2	1
313	1B	IWB9147	40.7689	**	1	2	1	2	1	1	1	1	1	2	1	1	1	1	2	1	2	2	2	2	1	1	1	2	1	2	1	2	2	1	1	1	2	2	1	2	3	1	2	1	2	2	2	2	1
314	1B	IWB8588	40.7689	**	1	2	1	2	1	1	1	1	1	2	1	1	1	1	2	1	2	2	2	2	1	1	1	2	1	2	1	2	2	1	1	1	2	2	1	2	2	1	2	1	2	2	2	2	1
315	1B	IWB5596	42.1911	***	1	2	1	2	1	1	1	1	1	2	1	1	1	1	1	1	2	1	2	2	1	1	1	2	1	2	1	2	2	1	1	1	2	2	1	2	2	1	2	1	2	2	2	2	1
316	1B	IWB47778	42.1911	***	1	2	1	2	1	1	1	1	1	2	1	1	1	1	1	1	2	1	2	2	1	1	1	2	1	2	1	2	2	1	1	1	2	2	1	2	2	1	2	1	2	2	2	2	1
317	1B	IWB60665	42.4215	***	1	2	1	2	1	1	1	1	1	2	1	1	1	1	1	1	2	1	2	2	1	1	1	2	1	2	1	2	2	1	1	1	2	2	1	2	2	1	2	1	2	2	2	2	1
318	1B	IWB51784	42.4215	***	1	2	1	2	1	1	1	1	1	2	1	1	1	1	1	1	2	1	2	2	1	1	1	2	1	2	1	2	2	1	1	1	2	2	1	2	2	1	2	1	2	2	2	2	1
319	1B	IWB60596	42.4215	***	1	2	1	2	1	1	1	1	1	2	1	1	1	1	1	1	2	1	2	2	1	1	1	2	1	2	1	2	2	1	1	1	2	2	1	2	2	1	3	1	2	2	2	2	1
320	1B	IWB63945	42.4215	***	1	2	1	2	1	1	1	1	1	2	1	1	1	1	1	1	2	1	2	2	1	1	1	2	1	2	1	2	2	1	1	1	2	2	1	2	2	1	1	1	2	2	2	2	1
321	1B	IWB75530	42.4215	***	1	2	1	2	1	1	1	1	1	2	1	1	1	1	1	1	2	1	2	2	1	1	1	2	1	2	1	2	2	1	1	1	2	2	1	2	2	1	3	1	2	2	2	2	1
322	1B	IWB76271	42.4215	***	1	2	1	2	1	1	1	1	1	2	1	1	1	1	1	1	2	1	2	2	1	1	1	2	1	2	1	2	2	1	1	1	2	2	1	2	2	1	3	1	2	2	2	2	1
323	1B	IWB74186	42.4215	***	1	2	1	2	1	1	1	1	1	2	1	1	1	1	1	1	2	1	2	2	1	1	1	2	1	2	1	2	2	1	1	1	2	2	1	2	2	1	3	1	2	2	2	2	1
324	1B	IWB72968	42.4215	***	1	2	1	2	1	1	1	1	1	2	1	1	1	1	1	1	2	1	2	2	1	1	1	2	1	2	1	2	2	1	1	1	2	2	1	2	2	1	3	1	2	2	2	2	1
325	1B	IWB72967	42.4215	***	1	2	1	2	1	1	1	1	1	2	1	1	1	1	1	1	2	1	2	2	1	1	1	2	1	2	1	2	2	1	1	1	2	2	1	2	2	1	3	1	2	2	2	2	1
326	1B	IWB72966	42.4215	***	1	2	1	2	1	1	1	1	1	2	1	1	1	1	1	1	2	1	2	2	1	1	1	2	1	2	1	2	2	1	1	1	2	2	1	2	2	1	3	1	2	2	2	2	1
327	1B	IWB72756	42.4215	***	1	2	1	2	1	1	1	1	1	2	1	1	1	1	1	1	2	1	2	2	1	1	1	2	1	2	1	2	2	1	1	1	2	2	1	2	2	1	3	1	2	2	2	2	1
328	1B	IWB72755	42.4215	***	1	2	1	2	1	1	1	1	1	2	1	1	1	1	1	1	2	1	2	2	1	1	1	2	1	2	1	2	2	1	1	1	2	2	1	2	2	1	3	1	2	2	2	2	1
329	1B	IWB70284	42.4215	***	1	2	1	2	1	1	1	1	1	2	1	1	1	1	1	1	2	1	2	2	1	1	1	2	1	2	1	2	2	1	1	1	2	2	1	2	2	1	3	1	2	2	2	2	1
330	1B	IWB70190	42.4215	***	1	2	1	2	1	1	1	1	1	2	1	1	1	1	1	1	2	1	2	2	1	1	1	2	1	2	1	2	2	1	1	1	2	2	1	2	2	1	3	1	2	2	2	2	1
331	1B	IWB70189	42.4215	***	1	2	1	2	1	1	1	1	1	2	1	1	1	1	1	1	2	1	2	2	1	1	1	2	1	2	1	2	2	1	1	1	2	2	1	2	2	1	3	1	2	2	2	2	1
332	1B	IWB68271	42.4215	***	1	2	1	2	1	1	1	1	1	2	1	1	1	1	1	1	2	1	2	2	1	1	1	2	1	2	1	2	2	1	1	1	2	2	1	2	2	1	3	1	2	2	2	2	1
333	1B	IWB67968	42.4215	***	1	2	1	2	1	1	1	1	1	2	1	1	1	1	1	1	2	1	2	2	1	1	1	2	1	2	1	2	2	1	1	1	2	2	1	2	2	1	3	1	2	2	2	2	1
334	1B	IWB63614	42.4215	***	1	2	1	2	1	1	1	1	1	2	1	1	1	1	1	1	2	1	2	2	1	1	1	2	1	2	1	2	2	1	1	1	2	2	1	2	2	1	3	1	2	2	2	2	1
335	1B	IWB63062	42.4215	***	1	2	1	2	1	1	1	1	1	2	1	1	1	1	1	1	2	1	2	2	1	1	1	2	1	2	1	2	2	1	1	1	2	2	1	2	2	1	3	1	2	2	2	2	1
336	1B	IWB62417	42.4215	***	1	2	1	2	1	1	1	1	1	2	1	1	1	1	1	1	2	1	2	2	1	1	1	2	1	2	1	2	2	1	1	1	2	2	1	2	2	1	3	1	2	2	2	2	1
337	1B	IWB59775	42.4215	***	1	2	1	2	1	1	1	1	1	2	1	1	1	1	1	1	2	1	2	2	1	1	1	2	1	2	1	2	2	1	1	1	2	2	1	2	2	1	3	1	2	2	2	2	1
338	1B	IWB58640	42.4215	***	1	2	1	2	1	1	1	1	1	2	1	1	1	1	1	1	2	1	2	2	1	1	1	2	1	2	1	2	2	1	1	1	2	2	1	2	2	1	3	1	2	2	2	2	1
339	1B	IWB47024	42.4215	***	1	2	1	2	1	1	1	1	1	2	1	1	1	1	1	1	2	1	2	2	1	1	1	2	1	2	1	2	2	1	1	1	2	2	1	2	2	1	3	1	2	2	2	2	1
340	1B	IWB43111	42.4215	***	1	2	1	2	1	1	1	1	1	2	1	1	1	1	1	1	2	1	2	2	1	1	1	2	1	2	1	2	2	1	1	1	2	2	1	2	2	1	3	1	2	2	2	2	1
341	1B	IWB40986	42.4215	***	1	2	1	2	1	1	1	1	1	2	1	1	1	1	1	1	2	1	2	2	1	1	1	2	1	2	1	2	2	1	1	1	2	2	1	2	2	1	3	1	2	2	2	2	1
342	1B	IWB38670	42.4215	***	1	2	1	2	1	1	1	1	1	2	1	1	1	1	1	1	2	1	2	2	1	1	1	2	1	2	1	2	2	1	1	1	2	2	1	2	2	1	3	1	2	2	2	2	1
343	1B	IWB35740	42.4215	***	1	2	1	2	1	1	1	1	1	2	1	1	1	1	1	1	2	1	2	2	1	1	1	2	1	2	1	2	2	1	1	1	2	2	1	2	2	1	3	1	2	2	2	2	1
344	1B	IWB35515	42.4215	***	1	2	1	2	1	1	1	1	1	2	1	1	1	1	1	1	2	1	2	2	1	1	1	2	1	2	1	2	2	1	1	1	2	2	1	2	2	1	3	1	2	2	2	2	1
345	1B	IWB34998	42.4215	***	1	2	1	2	1	1	1	1	1	2	1	1	1	1	1	1	2	1	2	2	1	1	1	2	1	2	1	2	2	1	1	1	2	2	1	2	2	1	3	1	2	2	2	2	1
346	1B	IWB31722	42.4215	***	1	2	1	2	1	1	1	1	1	2	1	1	1	1	1	1	2	1	2	2	1	1	1	2	1	2	1	2	2	1	1	1	2	2	1	2	2	1	3	1	2	2	2	2	1
347	1B	IWB30727	42.4215	***	1	2	1	2	1	1	1	1	1	2	1	1	1	1	1	1	2	1	2	2	1	1	1	2	1	2	1	2	2	1	1	1	2	2	1	2	2	1	3	1	2	2	2	2	1
348	1B	IWB74187	42.4215	***	1	2	1	2	1	1	1	1	1	2	1	1	1	1	1	1	2	1	2	2	1	1	1	2	1	2	1	2	2	1	1	1	2	2	1	2	2	1	3	1	2	2	2	2	1
349	1B	IWB73650	42.4215	***	1	2	1	2	1	1	1	1	1	2	1	1	1	1	1	1	2	1	2	2	1	1	1	2	1	2	1	2	2	1	1	1	2	2	1	2	2	1	3	1	2	2	2	2	1
350	1B	IWB64056	42.4215	***	1	2	1	2	1	1	1	1	1	2	1	1	1	1	1	1	2	1	2	2	1	1	1	2	1	2	1	2	2	1	1	1	2	2	1	2	2	1	3	1	2	2	2	2	1
351	1B	IWB47026	42.4215	***	1	2	1	2	1	1	1	1	1	2	1	1	1	1	1	1	2	1	2	2	1	1	1	2	1	2	1	2	2	1	1	1	2	2	1	2	2	1	3	1	2	2	2	2	1
352	1B	IWB40316	42.4215	***	1	2	1	2	1	1	1	1	1	2	1	1	1	1	1	1	2	1	2	2	1	1	1	2	1	2	1	2	2	1	1	1	2	2	1	2	2	1	3	1	2	2	2	2	1
353	1B	IWB22709	42.4215	***	1	2	1	2	1	1	1	1	1	2	1	1	1	1	1	1	2	1	2	2	1	1	1	2	1	2	1	2	2	1	1	1	2	2	1	2	2	1	3	1	2	2	2	2	1
354	1B	IWB14377	42.4215	***	1	2	1	2	1	1	1	1	1	2	1	1	1	1	1	1	2	1	2	2	1	1	1	2	1	2	1	2	2	1	1	1	2	2	1	2	2	1	3	1	2	2	2	2	1
355	1B	IWB34685	42.4215	***	1	2	1	2	1	1	1	1	1	2	1	1	1	1	1	1	2	1	2	2	1	1	1	2	1	2	1	2	2	1	1	1	2	2	1	2	2	1	3	1	2	2	2	2	1
356	1B	IWB56964	42.4215	***	1	2	1	2	1	1	1	1	1	2	1	1	1	1	1	1	2	1	2	2	1	1	1	2	1	2	1	2	2	1	1	1	2	2	1	2	2	1	3	1	2	2	2	2	1
357	1B	IWB30185	42.4215	***	1	2	1	2	1	1	1	1	1	2	1	1	1	1	1	1	2	1	2	2	1	1	1	2	1	2	1	2	2	1	1	1	2	2	1	2	2	1	1	1	2	2	2	2	1
358	1B	IWB71413	42.4215	***	1	2	1	2	1	1	1	1	1	2	1	1	1	1	1	1	2	1	2	2	1	1	1	2	1	2	1	2	2	1	1	1	2	2	1	2	2	1	3	1	2	2	2	2	1
359	1B	IWB62424	42.4215	***	1	2	1	2	1	1	1	1	1	2	1	1	1	1	1	1	2	1	2	2	1	1	1	2	1	2	1	2	2	1	1	1	2	2	1	2	2	1	3	1	2	2	2	2	1
360	1B	IWB38751	42.4215	***	1	2	1	2	1	1	1	1	1	2	1	1	1	1	1	1	2	1	2	2	1	1	1	2	1	2	1	2	2	1	1	1	2	2	1	2	2	1	3	1	2	2	2	2	1
361	1B	IWB47788	42.4215	***	1	2	1	2	1	1	1	1	1	2	1	1	1	1	1	1	2	1	2	2	1	1	1	2	1	2	1	2	2	1	1	1	2	2	1	2	2	1	2	1	2	2	2	2	1
362	1B	IWB40632	42.4215	***	1	2	1	2	1	1	1	1	1	2	1	1	1	1	1	1	2	1	2	2	1	1	1	2	1	2	1	2	2	1	1	1	2	2	1	2	2	1	3	1	2	2	2	2	1
363	1B	IWB20091	42.4215	**	1	2	1	2	1	1	1	1	1	2	1	1	1	1	1	1	2	1	2	2	1	1	1	2	1	2	1	2	2	1	1	1	2	2	1	2	2	1	2	1	2	2	2	2	1
364	1B	IWB61947	42.4215	**	1	2	1	2	1	1	1	1	1	2	1	1	1	1	1	1	2	1	2	2	1	1	1	2	1	2	1	2	2	1	1	1	2	2	1	2	2	1	2	1	2	2	2	2	1
365	1B	IWB21152	42.4215	***	1	2	1	2	1	1	1	1	1	2	1	1	1	1	1	1	2	1	2	2	1	1	1	2	1	2	1	2	2	1	1	1	2	2	1	2	2	1	2	1	2	2	2	2	1
366	1B	IWB8956	42.4215	***	1	2	1	2	1	1	1	1	1	2	1	1	1	1	1	1	2	1	2	2	1	1	1	2	1	2	1	2	2	1	1	1	2	2	1	2	2	1	3	1	2	2	2	2	1
367	1B	IWB71064	42.4215	***	1	2	1	2	1	1	1	1	1	2	1	1	1	1	1	1	2	1	2	2	1	1	1	2	1	2	1	2	2	1	1	1	2	2	1	2	2	1	3	1	2	2	2	2	1
368	1B	IWB65799	42.4215	***	1	2	1	2	1	1	1	1	1	2	1	1	1	1	1	1	2	1	2	2	1	1	1	2	1	2	1	2	2	1	1	1	2	2	1	2	2	1	3	1	2	2	2	2	1
369	1B	IWB56374	42.4215	***	1	2	1	2	1	1	1	1	1	2	1	1	1	1	1	1	2	1	2	2	1	1	1	2	1	2	1	2	2	1	1	1	2	2	1	2	2	1	3	1	2	2	2	2	1
370	1B	IWB54994	42.4215	***	1	2	1	2	1	1	1	1	1	2	1	1	1	1	1	1	2	1	2	2	1	1	1	2	1	2	1	2	2	1	1	1	2	2	1	2	2	1	3	1	2	2	2	2	1
371	1B	IWB54340	42.4215	***	1	2	1	2	1	1	1	1	1	2	1	1	1	1	1	1	2	1	2	2	1	1	1	2	1	2	1	2	2	1	1	1	2	2	1	2	2	1	3	1	2	2	2	2	1
372	1B	IWB4322	42.4215	***	1	2	1	2	1	1	1	1	1	2	1	1	1	1	1	1	2	1	2	2	1	1	1	2	1	2	1	2	2	1	1	1	2	2	1	2	2	1	3	1	2	2	2	2	1
373	1B	IWB39745	42.4215	***	1	2	1	2	1	1	1	1	1	2	1	1	1	1	1	1	2	1	2	2	1	1	1	2	1	2	1	2	2	1	1	1	2	2	1	2	2	1	3	1	2	2	2	2	1
374	1B	IWB23446	42.4215	***	1	2	1	2	1	1	1	1	1	2	1	1	1	1	1	1	2	1	2	2	1	1	1	2	1	2	1	2	2	1	1	1	2	2	1	2	2	1	3	1	2	2	2	2	1
375	1B	IWB71062	42.4215	***	1	2	1	2	1	1	1	1	1	2	1	1	1	1	1	1	2	1	2	2	1	1	1	2	1	2	1	2	2	1	1	1	2	2	1	2	2	1	3	1	2	2	2	2	1
376	1B	IWB69635	42.4215	***	1	2	1	2	1	1	1	1	1	2	1	1	1	1	1	1	2	1	2	2	1	1	1	2	1	2	1	2	2	1	1	1	2	2	1	2	2	1	3	1	2	2	2	2	1
377	1B	IWB67218	42.4215	***	1	2	1	2	1	1	1	1	1	2	1	1	1	1	1	1	2	1	2	2	1	1	1	2	1	2	1	2	2	1	1	1	2	2	1	2	2	1	3	1	2	2	2	2	1
378	1B	IWB60860	42.4215	***	1	2	1	2	1	1	1	1	1	2	1	1	1	1	1	1	2	1	2	2	1	1	1	2	1	2	1	2	2	1	1	1	2	2	1	2	2	1	3	1	2	2	2	2	1
379	1B	IWB57232	42.4215	***	1	2	1	2	1	1	1	1	1	2	1	1	1	1	1	1	2	1	2	2	1	1	1	2	1	2	1	2	2	1	1	1	2	2	1	2	2	1	3	1	2	2	2	2	1
380	1B	IWB48018	42.4215	***	1	2	1	2	1	1	1	1	1	2	1	1	1	1	1	1	2	1	2	2	1	1	1	2	1	2	1	2	2	1	1	1	2	2	1	2	2	1	3	1	2	2	2	2	1
381	1B	IWB80628	42.4215	***	1	2	1	2	1	1	1	1	1	2	1	1	1	1	1	1	2	1	2	2	1	1	1	2	1	2	1	2	2	1	1	1	2	2	1	2	2	1	3	1	2	2	2	2	1
382	1B	IWB72742	42.4215	***	1	2	1	2	1	1	1	1	1	2	1	1	1	1	1	1	2	1	2	2	1	1	1	2	1	2	1	2	2	1	1	1	2	2	1	2	2	1	3	1	2	2	2	2	1
383	1B	IWB71939	42.4215	***	1	2	1	2	1	1	1	1	1	2	1	1	1	1	1	1	2	1	2	2	1	1	1	2	1	2	1	2	2	1	1	1	2	2	1	2	2	1	3	1	2	2	2	2	1
384	1B	IWB55832	42.4215	***	1	2	1	2	1	1	1	1	1	2	1	1	1	1	1	1	2	1	2	2	1	1	1	2	1	2	1	2	2	1	1	1	2	2	1	2	2	1	3	1	2	2	2	2	1
385	1B	IWB76619	42.4215	***	1	2	1	2	1	1	1	1	1	2	1	1	1	1	1	1	2	1	2	2	1	1	1	2	1	2	1	2	2	1	1	1	2	2	1	2	2	1	3	1	2	2	2	2	1
386	1B	IWB55154	42.4215	***	1	2	1	2	1	1	1	1	1	2	1	1	1	1	1	1	2	1	2	2	1	1	1	2	1	2	1	2	2	1	1	1	2	2	1	2	2	1	2	1	2	2	2	2	1
387	1B	IWB68771	42.4215	***	1	2	1	2	1	1	1	1	1	2	1	1	1	1	1	1	2	1	2	2	1	1	1	2	1	2	1	2	2	1	1	1	2	2	1	2	2	1	2	1	2	2	2	2	1
388	1B	IWB55131	42.4215	***	1	2	1	2	1	1	1	1	1	2	1	1	1	1	1	1	2	1	2	2	1	1	1	2	1	2	1	2	2	1	1	1	2	2	1	2	2	1	3	1	2	2	2	2	1
389	1B	IWB63613	42.4215	***	1	2	1	2	1	1	1	1	1	2	1	1	1	1	1	1	2	1	2	2	1	1	1	2	1	2	1	2	2	1	1	1	2	2	1	2	2	1	3	1	2	2	2	2	1
390	1B	IWB40634	42.4215	***	1	2	1	2	1	1	1	1	1	2	1	1	1	1	1	1	2	1	2	2	1	1	1	2	1	2	1	2	2	1	1	1	2	2	1	2	2	1	3	1	2	2	2	2	1
391	1B	IWB31721	42.4215	***	1	2	1	2	1	1	1	1	1	2	1	1	1	1	1	1	2	1	2	2	1	1	1	3	1	2	1	2	2	1	1	1	2	2	1	2	2	1	3	1	2	2	2	2	1
392	1B	IWB45552	42.4215	***	1	2	1	2	1	1	1	1	1	2	1	1	1	1	1	1	2	1	2	2	1	1	1	3	1	2	1	2	2	1	1	1	2	2	1	2	2	1	3	1	2	2	2	2	1
393	1B	IWB72741	42.4215	***	1	2	1	2	1	1	1	1	1	2	1	1	1	1	1	1	2	1	2	2	1	1	1	3	1	2	1	2	2	1	1	1	2	2	1	2	2	1	3	1	2	2	2	2	1
394	1B	IWB24040	42.4215	***	1	2	1	2	1	1	1	1	1	2	1	1	1	1	1	1	2	1	2	2	1	1	1	2	1	2	1	2	2	1	1	1	2	2	1	2	2	1	3	1	2	2	2	2	1
395	1B	IWB20536	42.4215	***	3	2	1	2	1	1	1	1	1	2	1	1	1	1	1	1	2	1	2	2	1	1	1	2	1	2	1	2	2	1	1	1	2	2	1	2	2	1	3	1	2	2	2	2	1
396	1B	IWB71887	42.4215	***	1	2	1	2	1	1	1	1	1	2	1	1	1	1	1	1	2	1	2	2	1	1	1	2	1	2	1	2	2	1	1	1	2	2	1	2	2	1	3	1	2	2	2	2	1
397	1B	IWB53408	42.4215	***	1	2	1	2	1	1	1	1	1	2	1	1	1	1	1	1	2	1	2	2	1	1	1	2	1	2	1	2	2	1	1	1	2	2	1	2	2	1	3	1	2	2	2	2	1
398	1B	IWB31723	42.4215	***	1	2	1	2	1	1	1	1	1	2	1	1	1	1	1	1	2	1	2	2	1	1	1	2	1	2	1	2	2	1	1	1	2	2	1	2	2	1	3	1	2	2	2	2	1
399	1B	IWB49800	42.4215	***	1	2	1	2	1	1	1	1	1	2	1	1	1	1	1	1	2	1	2	2	1	1	1	2	1	2	1	2	2	1	1	1	2	2	1	2	2	1	3	1	2	2	2	2	1
400	1B	IWB39145	42.4215	***	1	2	1	2	1	1	1	1	1	2	1	1	1	1	1	1	2	1	2	2	1	1	1	2	1	2	1	2	2	1	1	1	2	2	1	2	2	1	3	1	2	2	2	2	1
401	1B	IWB60859	42.4215	***	1	2	1	2	1	1	1	1	1	2	1	1	1	1	1	1	2	1	2	2	1	1	1	2	1	2	1	2	2	1	1	1	2	2	1	2	2	1	3	1	2	2	2	2	1
402	1B	IWB79477	42.4215	***	1	2	1	2	1	1	1	1	1	2	1	1	1	1	1	1	2	1	2	2	1	1	1	2	1	2	1	2	2	1	1	3	2	2	1	2	2	1	3	1	2	2	2	2	1
403	1B	IWB61331	42.4215	***	1	2	1	2	1	1	1	1	1	2	1	1	1	1	1	1	2	1	2	2	1	1	1	2	1	2	1	2	2	1	1	3	2	2	1	2	2	1	3	1	2	2	2	2	1
404	1B	IWB56965	42.4215	***	1	2	1	2	1	1	1	1	1	2	1	1	1	1	1	1	2	1	2	2	1	1	1	2	1	2	1	2	2	1	1	3	2	2	1	2	2	1	3	1	2	2	2	2	1
405	1B	IWB26169	42.4215	***	1	2	1	2	1	1	1	1	1	2	1	1	1	1	1	1	2	1	2	2	1	1	1	2	1	2	1	2	2	1	1	3	2	2	1	2	2	1	3	1	2	2	2	2	1
406	1B	IWB37294	42.4215	***	1	2	1	2	1	1	1	1	1	2	1	1	1	1	1	1	2	1	2	2	1	1	1	2	1	2	1	2	2	1	1	3	2	2	1	2	2	1	3	1	2	2	2	2	1
407	1B	IWB54643	42.4215	**	1	2	1	2	1	1	1	1	1	2	1	1	1	1	1	1	2	1	2	2	1	1	1	2	1	2	1	2	2	1	1	3	2	2	1	2	2	1	3	1	2	2	2	2	1
408	1B	IWB24606	42.4215	**	1	2	1	2	1	1	1	1	1	2	1	1	1	1	1	1	2	1	2	2	1	1	1	2	1	2	1	2	2	1	1	3	2	2	1	2	2	1	3	1	2	2	2	2	1
409	1B	IWB47025	42.4215	***	1	2	1	2	1	1	1	1	1	2	1	1	1	1	1	1	2	1	2	2	1	1	1	2	1	2	1	2	2	1	1	1	2	2	1	2	2	1	3	1	2	2	2	2	1
410	1B	IWB50985	42.4215	***	1	2	1	2	1	1	1	1	1	2	1	1	1	1	1	1	2	1	2	2	1	1	1	2	1	2	1	2	2	1	1	1	2	2	1	2	2	1	3	1	2	2	2	2	1
411	1B	IWB27146	42.4215	***	1	2	1	2	1	1	1	1	1	2	1	1	1	1	1	1	2	1	2	2	1	1	1	2	1	2	1	2	2	1	1	1	2	2	1	2	2	1	3	1	2	2	2	2	1
412	1B	IWB47585	42.4215	***	1	2	1	2	1	1	1	1	1	2	1	1	1	1	1	1	2	1	2	2	1	1	1	3	1	2	1	2	2	1	1	1	2	2	1	2	2	1	3	1	2	2	2	2	1
413	1B	IWB9573	42.4215	***	1	2	1	2	1	1	1	1	1	2	1	1	1	1	1	1	2	1	2	2	1	1	1	2	1	2	1	2	2	1	1	1	2	2	1	2	2	1	3	1	2	2	2	2	1
414	1B	IWB65426	42.4215	***	1	2	1	2	1	1	1	1	1	2	1	1	1	1	1	1	2	1	2	2	1	1	1	2	1	2	1	2	2	1	1	3	2	2	1	2	2	1	3	1	2	2	2	2	1
415	1B	IWB8141	42.4215	***	1	2	1	2	1	1	1	1	1	2	1	1	1	1	1	1	2	1	2	2	1	1	1	2	1	2	1	2	2	1	1	1	2	2	1	2	2	1	3	1	2	2	2	2	1
416	1B	IWB2664	42.4215	***	1	2	1	2	1	1	1	1	1	2	1	1	1	1	1	1	2	1	2	2	1	1	1	2	1	2	1	2	2	1	1	1	2	2	1	2	2	1	2	1	2	2	2	2	1
417	1B	IWB28303	42.4215	***	1	2	1	2	1	1	1	1	1	2	1	1	1	1	1	1	2	1	2	2	1	1	1	2	1	2	1	2	2	1	1	1	2	2	1	2	2	1	3	1	2	2	2	2	1
418	1B	IWB6405	42.6529	***	1	2	1	2	1	1	1	1	1	2	1	1	1	1	1	1	2	1	2	2	1	1	1	2	1	2	1	2	2	1	1	1	2	2	1	2	2	1	3	1	2	2	2	2	1
419	1B	IWB74352	42.6529	***	1	2	1	2	1	1	1	1	1	2	1	1	1	1	1	1	2	1	2	2	1	1	1	2	1	2	1	2	2	1	1	1	2	2	1	2	2	1	3	1	2	2	2	2	1
420	1B	IWB74353	42.6529	***	1	2	1	2	1	1	1	1	1	2	1	1	1	1	1	1	2	1	2	2	1	1	1	2	1	2	1	2	2	1	1	1	2	2	1	2	2	1	3	1	2	2	2	2	1
421	1B	IWB20264	42.6529	***	1	2	1	2	1	1	1	1	1	2	1	1	1	1	1	1	2	1	2	2	1	1	1	2	1	2	1	2	2	1	1	1	2	2	1	2	2	1	3	1	2	2	2	2	1
422	1B	IWB31756	42.6529	***	1	2	1	2	1	1	1	1	1	2	1	1	1	1	1	1	2	1	2	2	1	1	1	2	1	2	1	2	2	1	1	1	2	2	1	2	2	1	3	1	2	2	2	2	1
423	1B	IWB669	42.6529	***	1	2	1	2	1	1	1	1	1	2	1	1	1	1	1	1	2	1	2	2	1	1	1	2	1	2	1	2	2	1	1	1	2	2	1	2	2	1	3	1	2	2	2	2	1
424	1B	IWB30161	43.8324	***	1	2	1	2	1	1	2	1	1	2	1	1	1	1	1	1	2	1	1	2	1	1	1	2	2	2	1	2	2	1	1	1	2	2	1	2	2	1	3	1	2	2	2	2	1
425	1B	IWB1569	43.8324	**	1	2	1	2	1	1	2	1	1	2	1	1	1	1	1	1	2	1	1	2	1	1	1	2	2	2	1	2	2	1	1	3	2	2	1	2	2	1	3	1	2	2	2	2	1
426	1B	IWB43992	43.8324	***	1	2	1	2	1	1	2	1	1	2	1	1	1	1	1	1	2	1	1	2	1	1	1	2	2	2	1	2	2	1	1	1	2	2	1	2	2	1	3	1	2	2	2	2	1
427	1B	IWB40931	43.8324	***	1	2	1	2	1	1	2	1	1	2	1	1	1	1	1	1	2	1	1	2	1	1	1	2	2	2	1	2	2	1	1	1	2	2	1	2	2	1	3	1	2	2	2	2	1
428	1B	IWB9149	43.8324	**	1	2	1	2	1	1	2	1	1	2	1	1	1	1	1	1	2	1	1	2	1	1	1	2	2	2	1	2	2	1	1	1	2	2	1	2	2	1	3	1	2	2	2	2	1
429	1B	IWB60321	43.8324	**	1	2	1	2	1	1	2	1	1	2	1	1	1	1	1	1	2	1	1	2	1	1	1	2	2	2	1	2	2	1	1	1	2	2	1	2	2	1	3	1	2	2	2	2	1
430	1B	IWB35383	43.8324	**	1	2	1	2	1	1	2	1	1	2	1	1	1	1	1	1	2	1	1	2	1	1	1	2	2	2	1	2	2	1	1	1	2	2	1	2	2	1	3	1	2	2	2	2	1
431	1B	IWB820	43.8324	**	1	2	1	2	1	1	2	1	1	2	1	1	1	1	1	1	2	1	1	2	1	1	1	2	2	2	1	2	2	1	1	1	2	2	1	2	2	1	3	1	2	2	2	2	1
432	1B	IWB81008	43.8324	**	1	2	1	2	1	1	2	1	1	2	1	1	1	1	1	1	2	1	1	2	1	1	1	2	2	2	1	2	2	1	1	1	2	2	1	2	2	1	3	1	2	2	2	2	1
433	1B	IWB508	43.8324	***	1	2	1	2	1	1	2	1	1	2	1	1	1	1	1	1	2	1	1	2	1	1	1	2	2	2	1	2	2	1	1	1	2	2	1	2	2	1	3	1	2	2	2	2	1
434	1B	IWB78993	43.8324	***	1	2	1	2	1	1	2	1	1	2	1	1	1	1	1	1	2	1	1	2	1	1	1	2	2	2	1	2	2	1	1	1	2	2	1	2	2	1	3	1	2	2	2	2	1
435	1B	IWB77933	43.8324	***	1	2	1	2	1	1	2	1	1	2	1	1	1	1	1	1	2	1	1	2	1	1	1	2	2	2	1	2	2	1	1	1	2	2	1	2	2	1	3	1	2	2	2	2	1
436	1B	IWB31560	43.8324	***	1	2	1	2	1	1	2	1	1	2	1	1	1	1	1	1	2	1	1	2	1	1	1	2	2	2	1	2	2	1	1	1	2	2	1	2	2	1	3	1	2	2	2	2	1
437	1B	IWB507	43.8324	***	1	2	1	2	1	1	2	1	1	2	1	1	1	1	1	1	2	1	1	2	1	1	1	2	2	2	1	2	2	1	1	1	2	2	1	2	2	1	3	1	2	2	2	2	1
438	1B	IWB34608	43.8324	***	1	2	1	2	1	1	2	1	1	2	1	1	1	1	1	1	2	1	1	2	1	1	1	2	2	2	1	2	2	1	1	1	2	2	1	2	2	1	3	1	2	2	2	2	1
439	1B	IWB30892	43.8324	***	1	2	1	2	1	1	2	1	1	2	1	1	1	1	1	1	2	1	1	2	1	1	1	2	2	2	1	2	2	1	1	1	2	2	1	2	2	1	3	1	2	2	2	2	1
440	1B	IWB45947	44.5301	**	1	2	1	2	1	1	2	1	1	2	1	1	1	1	1	1	1	1	1	2	1	1	1	2	2	2	1	2	2	1	1	1	2	2	1	2	2	1	3	1	2	2	2	2	1
441	1B	IWB55320	44.5301	**	1	2	1	2	1	1	2	1	1	2	1	1	1	1	1	1	1	1	1	2	1	1	1	2	2	2	1	2	2	1	1	1	2	2	1	2	2	1	3	1	2	2	2	2	1
442	1B	IWB45946	44.5301	**	1	2	1	2	1	1	2	1	1	2	1	1	1	1	1	1	1	1	1	2	1	1	1	2	2	2	1	2	2	1	1	1	2	2	1	2	2	1	3	1	2	2	2	2	1
443	1B	IWB80372	44.7616	**	1	2	1	2	1	1	2	1	1	2	1	1	1	1	1	1	1	1	1	2	1	1	1	2	1	2	1	2	2	1	1	1	2	2	1	2	2	1	3	1	2	2	2	2	1
444	1B	IWB7205	44.7616	***	1	2	1	2	1	1	2	1	1	2	1	1	1	1	1	1	1	1	1	2	1	1	1	2	1	2	1	2	2	1	1	1	2	2	1	2	2	1	3	1	2	2	2	2	1
445	1B	IWB58051	44.7616	**	1	2	1	2	1	1	2	1	1	2	1	1	1	1	1	1	1	1	1	2	1	1	1	2	1	2	1	2	2	1	1	1	2	2	1	2	2	1	3	1	2	2	2	2	1
446	1B	IWB39629	44.7616	**	1	2	1	2	1	1	2	1	1	2	1	1	1	1	1	1	1	1	1	2	3	1	1	2	1	2	1	2	2	1	1	3	2	2	1	2	2	1	1	1	2	2	2	2	1
447	1B	IWB41024	44.7616	***	1	2	1	2	1	1	2	1	1	3	1	1	1	1	1	1	1	1	1	2	2	1	1	2	1	2	1	2	2	1	1	1	2	2	1	2	2	1	3	1	2	2	2	3	1
448	1B	IWB13381	44.7616	**	1	2	1	2	1	1	2	1	1	2	1	1	1	1	1	1	1	1	1	2	2	1	1	2	1	2	1	2	2	1	1	1	2	2	1	2	2	1	3	1	2	2	2	2	1
449	1B	IWB66113	44.7616	**	1	2	1	2	1	1	2	1	1	2	1	1	1	1	1	1	1	1	1	2	2	1	1	2	1	2	1	2	2	1	1	1	2	2	1	2	2	1	3	1	2	2	2	2	1
450	1B	IWB49892	44.7616	***	1	2	1	2	1	1	2	1	1	2	1	1	1	1	1	1	1	1	1	2	2	1	1	2	1	2	1	2	2	1	1	1	2	2	1	2	2	1	3	1	2	2	2	2	1
451	1B	IWB22947	44.7616	***	1	2	1	2	1	1	2	1	1	2	1	1	1	1	1	1	1	1	1	2	2	1	1	3	1	2	1	2	3	1	1	1	2	2	1	2	2	1	3	1	2	2	2	2	1
452	1B	IWB80181	44.7616	**	1	2	1	2	1	1	2	1	1	2	1	1	1	1	1	1	1	1	1	2	2	1	1	2	1	2	1	2	2	1	1	1	2	2	1	2	2	1	2	1	2	2	2	2	1
453	1B	IWB41126	44.7616	**	1	2	1	2	1	1	2	1	1	2	1	1	1	1	1	1	1	1	1	2	2	1	1	2	1	2	1	2	2	1	1	1	2	2	1	2	2	1	3	1	2	2	2	2	1
454	1B	IWB77940	44.7616	**	1	2	1	2	1	1	2	1	1	2	1	1	1	1	1	1	1	1	1	2	2	1	1	2	1	2	1	2	2	1	1	1	2	2	1	2	2	1	3	1	2	2	2	2	1
455	1B	IWB62725	44.7616	**	1	2	1	2	1	1	2	1	1	2	1	1	1	1	1	1	1	1	1	2	2	1	1	2	1	2	1	2	2	1	1	1	2	2	1	2	2	1	3	1	2	2	2	2	1
456	1B	IWB50113	44.7616	**	1	2	1	2	1	1	2	1	1	2	1	1	1	1	1	1	1	1	1	2	2	1	1	2	1	2	1	2	2	1	1	1	2	2	1	2	2	1	3	1	2	2	2	2	1
457	1B	IWB6386	44.7616	**	1	2	1	2	1	1	2	1	1	2	1	1	1	1	1	1	1	1	1	2	2	1	1	2	1	2	1	2	2	1	1	1	2	2	1	2	2	1	3	1	2	2	2	2	1
458	1B	IWB81422	45.4593	**	1	2	1	2	1	1	2	1	1	2	1	1	1	1	1	1	1	1	1	2	2	1	1	2	1	2	1	2	2	1	1	1	2	2	1	2	2	1	3	1	2	2	2	2	1
459	1B	IWB38604	45.4593	**	1	2	1	2	1	1	2	1	1	2	1	1	1	1	1	1	1	1	1	2	2	1	1	2	1	2	1	2	2	1	1	1	2	2	1	2	2	1	3	1	2	2	2	2	1
460	1B	IWB78783	45.4593	**	1	2	1	2	1	1	3	1	1	2	1	1	1	1	1	1	1	1	1	2	2	1	1	2	1	2	1	2	2	1	1	1	2	2	1	2	2	1	3	1	2	2	2	2	1
461	1B	IWB75893	45.6907	**	1	2	1	2	1	1	2	1	1	2	1	1	1	1	1	1	1	1	1	2	2	1	1	2	1	2	1	2	2	1	1	1	2	2	1	2	2	1	3	1	2	2	2	2	1
462	1B	IWB6034	45.6907	**	1	2	1	2	1	1	2	1	1	2	1	1	1	1	1	1	1	1	1	2	2	1	1	2	1	2	1	2	2	1	1	3	2	2	1	2	2	1	3	1	2	2	2	2	1
463	1B	IWB36198	45.6907	**	1	2	1	2	1	1	2	1	1	2	1	1	1	1	1	1	1	1	1	2	2	1	1	2	1	2	1	2	2	1	1	3	2	2	1	2	2	1	3	1	2	2	2	2	1
464	1B	IWB6254	45.6907	**	1	2	1	2	1	1	2	1	1	2	1	1	1	1	1	1	1	1	1	2	2	1	1	2	1	2	1	2	2	1	1	1	2	2	1	2	2	1	2	1	2	2	2	2	1
465	1B	IWB65906	45.9244	**	1	2	1	2	1	1	2	1	1	2	1	1	1	1	1	1	1	1	1	2	2	1	1	2	1	2	1	2	2	1	1	1	2	2	1	2	2	1	3	1	2	2	2	2	1
466	1B	IWB6787	45.9244	**	1	2	1	2	1	1	2	1	1	2	1	1	1	1	1	1	1	1	1	2	2	1	1	2	1	2	1	2	2	1	1	1	2	2	1	2	2	1	3	1	2	2	2	2	1
467	1B	IWB12179	46.6221	**	1	2	1	2	1	1	2	1	1	2	1	1	1	1	1	1	1	1	1	2	2	1	1	2	1	2	1	2	2	1	1	1	2	2	1	2	1	1	3	1	2	2	2	2	1
468	1B	IWB9281	46.6221	***	1	2	1	2	1	1	2	1	1	2	1	1	1	1	1	1	1	1	1	2	2	1	1	2	1	2	1	2	2	1	1	1	2	2	1	2	1	1	3	1	2	2	2	2	1
469	1B	IWB73157	46.6221	**	1	2	1	2	1	1	2	1	1	2	1	1	1	1	1	1	1	1	1	2	2	1	1	2	1	2	1	2	2	1	1	3	2	2	1	2	1	1	3	1	2	2	2	2	1
470	1B	IWB6409	46.6221	**	1	2	1	2	1	1	2	1	1	2	1	1	1	1	1	1	1	1	1	2	2	1	1	2	1	2	1	2	2	1	1	1	2	2	1	2	1	1	3	1	2	2	2	2	1
471	1B	IWB7114	46.6221	**	1	2	1	2	1	1	2	1	1	2	1	1	1	1	1	1	1	1	1	2	2	1	1	2	1	2	1	2	2	1	1	1	2	2	1	2	1	1	3	1	2	2	2	2	1
472	1B	IWB72174	46.6221	***	1	2	1	2	1	1	2	1	1	2	1	1	1	1	1	1	1	1	1	2	2	1	1	2	1	2	1	2	2	1	1	1	2	2	1	2	1	1	3	1	2	2	2	2	1
473	1B	IWB72789	46.6221	**	1	2	1	2	1	1	2	1	1	2	1	1	1	1	1	1	1	1	1	2	2	1	1	2	1	2	1	2	2	1	1	1	2	2	1	2	1	1	3	1	2	2	2	2	1
474	1B	IWB73504	46.6221	**	1	2	1	2	1	1	2	1	1	2	1	1	1	1	1	1	1	1	1	2	2	1	1	2	1	2	1	2	2	1	1	1	2	2	1	2	1	1	3	1	2	2	2	2	1
475	1B	IWB55253	46.8557	**	1	2	1	2	1	1	2	1	1	2	1	1	1	1	1	1	1	1	1	2	2	1	1	2	1	2	1	2	2	1	1	1	2	2	1	2	1	1	3	1	2	2	2	2	1
476	1B	IWB34334	46.8557	***	1	2	1	2	1	1	2	1	1	2	1	1	1	1	1	1	1	1	1	2	2	1	1	2	1	2	1	2	2	1	1	1	2	2	1	2	1	1	3	1	2	2	2	2	1
477	1B	IWB31732	47.5534	**	1	2	1	2	1	1	2	1	1	2	1	1	1	1	1	1	1	1	1	2	2	1	2	2	1	2	1	2	2	1	1	1	2	2	1	2	1	1	3	1	2	2	2	2	1
478	1B	IWB20542	47.5534	**	1	2	1	2	1	1	2	1	1	2	1	1	1	1	1	1	1	1	1	2	2	1	2	2	1	2	1	2	2	1	1	1	2	2	1	2	1	1	3	1	2	2	2	2	1
479	1B	IWB44741	48.0164	**	1	2	1	2	1	1	2	1	1	2	1	1	1	1	1	1	1	1	1	2	2	1	2	2	1	2	1	2	2	1	1	1	2	2	1	2	1	1	3	1	2	2	2	2	1
480	1B	IWB39421	48.0164	**	1	2	1	2	1	1	2	1	1	2	1	1	1	1	1	1	1	1	1	2	2	1	2	2	1	2	1	2	2	1	1	1	2	2	1	2	1	1	3	1	2	2	2	2	1
481	1B	IWB37099	48.0164	**	1	2	1	2	1	1	2	1	1	2	1	1	1	1	1	1	1	1	1	2	2	1	2	2	1	2	1	2	2	1	1	1	2	2	1	2	1	1	3	1	2	2	2	2	1
482	1B	IWB80717	48.0164	**	1	2	1	2	1	1	2	1	1	2	1	1	1	1	1	1	1	1	1	2	2	1	2	2	1	2	1	2	2	1	1	1	2	2	1	2	1	1	3	1	2	2	2	2	1
483	1B	IWB76154	48.0164	**	1	2	1	2	1	1	2	1	1	2	1	1	1	1	1	1	1	1	1	2	2	1	2	2	1	2	1	2	2	1	1	1	2	2	1	2	1	1	3	1	2	2	2	2	1
484	1B	IWB44740	48.0164	**	1	2	1	2	1	1	2	1	1	2	1	1	1	1	1	1	1	1	1	2	2	1	2	2	1	2	1	2	2	1	1	1	2	2	1	2	1	1	3	1	2	2	2	2	1
485	1B	IWB51448	48.0164	**	1	2	1	2	1	1	2	1	1	2	1	1	1	1	1	1	1	1	1	2	2	1	2	2	1	2	1	2	2	1	1	1	2	2	1	2	1	1	3	1	2	2	2	2	1
486	1B	IWB50463	48.0164	**	1	2	1	2	1	1	2	1	1	2	1	1	1	1	1	1	1	1	1	2	2	1	2	2	1	2	1	2	2	1	1	1	2	2	1	2	1	1	3	1	2	2	2	2	1
487	1B	IWB51878	48.0164	**	1	2	1	2	1	1	2	1	1	2	1	1	1	1	1	1	1	1	1	2	2	1	2	2	1	2	1	2	2	1	1	1	2	2	1	2	1	1	3	1	2	2	2	2	1
488	1B	IWB67336	48.0164	**	1	2	1	2	1	1	2	1	1	2	1	1	1	1	1	1	1	1	1	2	2	1	2	2	1	2	1	2	2	1	1	1	2	2	1	2	1	1	3	1	2	2	2	2	1
489	1B	IWB73015	48.0164	**	1	2	1	2	1	1	2	1	1	2	1	1	1	1	1	1	1	1	1	2	2	1	2	2	1	2	1	2	2	1	1	1	2	2	1	2	1	1	3	1	2	2	2	2	1
490	1B	IWB80639	48.0164	**	1	2	1	2	1	1	2	1	1	2	1	1	1	1	1	1	1	1	1	2	2	1	2	2	1	2	1	2	2	1	1	1	2	2	1	2	1	1	3	1	2	2	2	2	1
491	1B	IWB36860	48.0164	**	1	2	1	2	1	1	2	1	1	2	1	1	1	1	1	1	1	1	1	2	2	1	2	2	1	2	1	2	2	1	1	1	2	2	1	2	1	1	3	1	2	2	2	2	1
492	1B	IWB79264	48.0164	**	1	2	1	2	1	1	2	1	1	2	1	1	1	1	1	1	1	1	1	2	2	1	2	2	1	2	1	2	2	1	1	1	2	2	1	2	1	1	3	1	2	2	2	2	1
493	1B	IWB47697	48.2468	**	1	2	1	2	1	1	2	1	1	2	1	1	1	1	1	1	1	1	1	2	2	1	2	2	1	2	1	2	2	1	1	1	2	2	1	2	1	1	3	1	2	2	2	2	1
494	1B	IWB14360	48.2468	**	1	2	1	2	1	1	2	1	1	2	1	1	1	1	1	1	1	1	1	2	2	1	2	2	1	2	1	2	2	1	1	3	2	2	1	2	1	1	3	1	2	2	2	3	1
495	1B	IWB32306	48.2468	**	1	2	1	2	1	1	2	1	1	2	1	1	1	1	1	1	1	1	1	2	2	1	2	2	1	2	1	2	2	1	1	1	2	2	1	2	1	1	3	1	2	2	2	2	1
496	1B	IWB50530	48.2468	**	1	2	1	2	1	1	2	1	1	2	1	1	1	1	1	1	1	1	1	2	2	1	2	2	1	2	1	2	2	1	1	1	2	2	1	2	1	1	3	1	2	2	2	2	1
497	1B	IWB42728	48.2468	**	1	2	1	2	1	1	2	1	1	2	1	1	1	1	1	1	1	1	1	2	2	1	2	2	1	2	1	2	2	1	1	1	2	2	1	2	1	1	3	1	2	2	2	2	1
498	1B	IWB55603	48.2468	**	1	2	1	2	1	1	2	1	1	2	1	1	1	1	1	1	1	1	1	2	2	1	2	2	1	2	1	2	2	1	1	1	2	2	1	2	1	1	3	1	2	2	2	2	1
499	1B	IWB14452	48.2468	**	1	2	1	2	1	1	2	1	1	2	1	1	1	1	1	1	1	1	1	2	2	1	2	2	1	2	1	2	2	1	1	1	2	2	1	2	1	1	3	1	2	2	2	2	1
500	1B	IWB31677	48.2468	**	1	2	1	2	1	1	2	1	1	2	1	1	1	1	1	1	1	1	1	2	2	1	2	2	1	2	1	2	2	1	1	1	2	2	1	2	1	1	3	1	2	2	2	2	1
501	1B	IWB61762	48.2468	**	1	2	1	2	1	1	2	1	1	2	1	1	1	1	1	1	1	1	1	2	2	1	2	2	1	2	1	2	2	1	1	1	2	2	1	2	1	1	3	1	2	2	2	2	1
502	1B	IWB25098	48.2468	**	1	2	1	2	1	1	2	1	1	2	1	1	1	1	1	1	1	1	1	2	2	1	2	2	1	2	1	2	2	1	1	1	2	2	1	2	1	1	3	1	2	2	2	2	1
503	1B	IWB50917	48.4783	**	1	2	1	2	1	1	2	1	1	2	1	1	1	1	1	1	1	1	1	2	2	1	2	2	1	2	1	2	2	1	1	1	2	2	1	2	1	1	3	1	2	2	2	2	1
504	1B	IWB21535	48.4783	**	1	2	1	2	1	1	2	1	1	2	1	1	1	1	1	1	1	1	1	2	2	1	2	2	1	2	1	2	2	1	1	1	2	2	1	2	1	1	1	1	2	2	2	2	1
505	1B	IWB9008	48.4783	**	1	2	1	2	1	1	2	1	1	2	1	1	1	1	1	1	1	1	1	2	2	1	2	2	1	2	1	2	2	1	1	1	2	2	1	2	1	1	3	1	2	2	2	2	1
506	1B	IWB50916	48.4783	**	1	2	1	2	1	1	2	1	1	2	1	1	1	1	1	1	1	1	1	2	2	1	2	2	1	2	1	2	2	1	1	1	2	2	1	2	1	1	3	1	2	2	2	2	1
507	1B	IWB4355	48.4783	**	1	2	1	2	1	1	2	1	1	2	1	1	1	1	1	1	1	1	1	2	2	1	2	2	1	2	1	2	2	1	1	1	2	2	1	2	1	1	3	1	2	2	2	2	1
508	1B	IWB75426	49.1793	**	1	2	1	2	1	1	2	1	1	2	1	1	1	1	1	1	1	1	1	2	2	1	2	2	1	2	1	2	2	1	1	1	2	2	1	2	2	1	3	1	2	2	2	2	1
509	1B	IWB40109	49.1793	**	1	2	1	2	1	1	2	1	1	2	1	1	1	1	1	1	1	1	1	2	2	1	2	2	1	2	1	2	2	1	1	1	2	2	1	2	2	1	3	1	2	2	2	2	1
510	1B	IWB58817	49.1793	**	1	2	1	2	1	1	2	1	1	2	1	1	1	1	1	1	1	1	1	2	2	1	2	2	1	2	1	2	2	1	1	1	2	2	1	2	2	1	3	1	2	2	2	2	1
511	1B	IWB49701	49.4118	**	1	2	1	2	1	1	2	1	1	2	1	1	1	1	1	1	1	1	1	2	2	1	2	2	1	2	1	2	2	1	1	1	2	2	1	2	2	1	3	1	2	2	2	2	1
512	1B	IWB8612	49.4118	**	1	2	1	2	1	1	2	1	1	2	1	1	1	1	1	1	1	1	1	2	2	1	2	2	1	2	1	2	2	1	1	1	2	2	1	2	2	1	3	1	2	2	2	2	1
513	1B	IWB13980	49.4118	**	1	2	1	2	1	1	2	1	1	2	1	1	1	1	1	1	1	1	1	2	2	1	2	2	1	2	1	2	2	1	1	1	2	2	1	2	2	1	3	1	2	2	2	2	1
514	1B	IWB35800	49.4118	***	1	2	1	2	1	1	2	1	1	2	1	1	1	1	1	1	1	1	1	2	2	1	2	2	1	2	1	2	2	1	1	1	2	2	1	2	2	1	3	1	2	2	2	2	1
515	1B	IWB49345	49.4118	**	1	2	1	2	1	1	2	1	1	2	1	1	1	1	1	1	1	1	1	2	2	1	2	2	1	2	1	2	2	1	1	1	2	2	1	2	2	1	3	1	2	2	2	2	1
516	1B	IWB68893	49.4118	**	1	2	1	2	1	1	2	1	1	2	1	1	1	1	1	1	1	1	1	2	2	1	2	2	1	2	1	2	2	1	1	3	2	2	1	2	2	1	3	1	2	2	2	2	1
517	1B	IWB8913	49.4118	**	1	2	1	2	1	1	2	1	1	2	1	1	1	1	1	1	1	1	1	2	2	1	2	2	1	2	1	2	2	1	1	3	2	2	1	2	2	1	3	1	2	2	2	2	1
518	1B	IWB26008	49.4118	**	1	2	1	2	1	1	2	1	1	2	1	1	1	1	1	1	1	1	1	2	2	1	2	2	1	2	1	2	2	1	1	3	2	2	1	2	2	1	3	1	2	2	2	2	1
519	1B	IWB51306	49.4118	**	1	2	1	2	1	1	2	1	1	2	1	1	1	1	1	1	1	1	1	2	2	1	2	2	1	2	1	2	2	1	1	1	2	2	1	2	2	1	3	1	2	2	2	2	1
520	1B	IWB6458	51.3266	***	1	2	1	2	1	2	2	1	1	2	1	1	1	1	1	1	1	1	1	2	2	1	2	2	1	2	1	2	2	1	1	1	2	2	1	2	2	1	3	1	2	2	2	2	1
521	1B	IWB75361	51.3266	**	1	2	1	2	1	2	2	1	1	2	1	1	1	1	1	1	1	1	1	2	2	1	2	2	1	2	1	2	2	1	1	1	2	2	1	2	2	1	3	1	2	2	2	2	1
522	1B	IWB12002	51.3266	***	1	2	1	2	1	2	2	1	1	2	1	1	1	1	1	1	1	1	1	2	2	1	2	2	1	2	1	2	2	1	1	1	2	2	1	2	2	1	3	1	2	2	2	2	1
523	1B	IWB6815	51.3266	***	1	2	1	2	1	2	2	1	1	2	1	1	1	1	1	1	1	1	1	2	2	1	2	2	1	2	1	2	2	1	1	1	2	2	1	2	2	1	3	1	2	2	2	2	1
524	1B	IWB69736	52.0308	***	1	2	1	2	1	2	2	1	1	2	1	1	1	1	1	1	1	1	1	2	2	1	2	2	1	2	1	2	2	1	1	1	1	2	1	2	2	1	3	1	2	2	2	2	1
525	1B	IWB36032	52.0308	***	1	2	1	2	1	2	2	1	1	2	1	1	1	1	1	1	1	1	1	2	2	1	2	2	1	2	1	2	2	1	1	1	1	2	1	2	2	1	3	1	2	2	2	2	1
526	1B	IWB54224	52.0308	***	1	2	1	2	1	2	2	1	1	2	1	1	1	1	1	1	1	1	1	2	2	1	2	2	1	2	1	2	2	1	1	1	1	2	1	2	2	1	3	1	2	2	2	2	1
527	1B	IWB69082	52.0308	***	1	2	1	2	1	2	2	1	1	2	1	1	1	1	1	1	1	1	1	2	2	1	2	2	1	2	1	2	2	1	1	1	1	2	1	2	2	1	3	1	2	2	3	2	1
528	1B	IWB10555	52.0308	***	1	2	1	2	1	2	2	1	1	2	1	1	1	1	1	1	1	1	1	2	2	1	2	2	1	2	1	2	2	1	1	1	1	2	1	2	2	1	3	1	2	2	2	2	1
529	1B	IWB73428	52.0308	***	1	2	1	2	1	2	2	1	1	2	1	1	1	1	1	1	1	1	1	2	2	1	2	2	1	2	1	2	2	1	1	1	1	2	1	2	2	1	1	1	2	2	2	2	1
530	1B	IWB73480	52.0308	***	1	2	1	2	1	2	2	1	1	2	1	1	1	1	1	1	1	1	1	2	2	1	2	2	1	2	1	2	2	1	1	1	1	2	1	2	2	1	3	1	2	2	2	2	1
531	1B	IWB40763	52.0308	***	1	2	1	2	1	2	2	1	1	2	1	1	1	1	1	1	1	1	1	2	2	1	2	2	1	2	1	2	2	1	1	1	1	2	1	2	2	1	3	1	2	2	2	2	1
532	1B	IWB192	52.0308	***	1	2	1	2	1	2	2	1	1	2	1	1	1	1	1	1	1	1	1	2	2	1	2	2	1	2	1	2	2	1	1	1	1	2	1	2	2	1	3	1	2	2	2	2	1
533	1B	IWB27852	52.0308	***	1	2	1	2	1	2	2	1	1	2	1	1	1	1	1	1	1	1	1	2	2	1	2	2	1	2	1	2	2	1	1	1	1	2	1	2	2	1	3	1	2	2	2	2	1
534	1B	IWB24844	52.0308	***	1	2	1	2	1	2	2	1	1	2	1	1	1	1	1	1	1	1	1	2	2	1	2	2	1	2	1	2	2	1	1	1	1	2	1	2	2	1	2	1	2	2	2	2	1
535	1B	IWB33337	52.0308	***	1	2	1	2	1	2	2	1	1	2	1	1	1	1	1	1	1	1	1	2	2	1	2	2	1	2	1	2	2	1	1	1	1	2	1	2	2	1	3	1	2	2	2	2	1
536	1B	IWB72598	52.0308	***	1	2	1	2	1	2	2	1	1	2	1	1	1	1	1	1	1	1	1	2	2	1	2	2	1	2	1	2	2	1	1	1	1	2	1	2	2	1	3	1	2	2	2	2	1
537	1B	IWB70318	52.0308	***	1	2	1	2	1	2	2	1	1	2	1	1	1	1	1	1	1	1	1	2	2	1	2	2	1	2	1	2	2	1	1	1	1	2	1	2	2	1	3	1	2	2	2	2	1
538	1B	IWB69081	52.0308	***	1	2	1	2	1	2	2	1	1	2	1	1	1	1	1	1	1	1	1	2	2	1	2	2	1	2	1	2	2	1	1	1	1	2	1	2	2	1	3	1	2	2	2	2	1
539	1B	IWB60240	52.0308	***	1	2	1	2	1	2	2	1	1	2	1	1	1	1	1	1	1	1	1	2	2	1	2	2	1	2	1	2	2	1	1	1	1	2	1	2	2	1	3	1	2	2	2	2	1
540	1B	IWB56778	52.0308	***	1	2	1	2	1	2	2	1	1	2	1	1	1	1	1	1	1	1	1	2	2	1	2	2	1	2	1	2	2	1	1	1	1	2	1	2	2	1	3	1	2	2	2	2	1
541	1B	IWB8804	52.0308	***	1	2	1	2	1	2	2	1	1	2	1	1	1	1	1	1	1	1	1	2	2	1	2	2	1	2	1	2	2	1	1	1	1	2	1	2	2	1	3	1	2	2	2	2	1
542	1B	IWB59327	52.0308	***	1	2	1	2	1	2	2	1	1	2	1	1	1	1	1	1	1	1	1	2	2	1	2	2	1	2	1	2	2	1	1	1	1	2	1	2	2	1	3	1	2	2	2	2	1
543	1B	IWB12484	52.0308	***	1	2	1	2	1	2	2	1	1	2	1	1	1	1	1	1	1	1	1	2	2	1	2	2	1	2	1	2	2	1	1	1	1	2	1	2	2	1	3	1	2	2	2	2	1
544	1B	IWB8148	52.0308	***	1	2	1	2	1	2	2	1	1	2	1	1	1	1	1	1	1	1	1	2	2	1	2	2	1	2	1	2	2	1	1	1	1	2	1	2	2	1	3	1	2	2	2	2	1
545	1B	IWB70882	52.0308	***	1	2	1	2	1	2	2	1	1	2	1	1	1	1	1	1	1	1	1	2	2	1	2	2	1	2	1	2	2	1	1	1	1	2	1	2	2	1	3	1	2	2	2	2	1
546	1B	IWB64687	52.0308	***	1	2	1	2	1	2	2	1	1	2	1	1	1	1	1	1	1	1	1	2	2	1	2	2	1	2	1	2	2	1	1	1	1	2	1	2	2	1	1	1	2	2	2	2	1
547	1B	IWB72559	52.0308	***	1	2	1	2	1	2	2	1	1	2	1	1	1	1	1	1	1	1	1	2	2	1	2	2	1	2	1	2	2	1	1	1	1	2	1	2	2	1	3	1	2	2	2	2	1
548	1B	IWB75593	52.0308	***	1	2	1	2	1	2	2	1	1	2	1	1	1	1	1	1	1	1	1	2	2	1	2	2	1	2	1	2	2	1	1	1	1	2	1	2	2	1	3	1	2	2	2	2	1
549	1B	IWB65324	52.0308	***	1	2	1	2	1	2	2	1	1	2	1	1	1	1	1	1	1	1	1	2	2	1	2	2	1	2	1	2	2	1	1	1	1	2	1	2	2	1	3	1	2	2	2	2	1
550	1B	IWB35871	52.0308	***	1	2	1	2	1	2	2	1	1	2	1	1	1	1	1	1	1	1	1	2	2	1	2	2	1	2	1	2	2	1	1	1	1	2	1	2	2	1	3	1	2	2	2	2	1
551	1B	IWB31759	52.0308	***	1	2	1	2	1	2	2	1	1	2	1	1	1	1	1	1	1	1	1	2	2	1	2	2	1	2	1	2	2	1	1	1	1	2	1	2	2	1	3	1	2	2	2	2	1
552	1B	IWB10897	52.0308	***	1	2	1	2	1	2	2	1	1	2	1	1	1	1	1	1	1	1	1	2	2	1	2	2	1	2	1	2	2	1	1	1	1	2	1	2	2	1	3	1	2	2	2	2	1
553	1B	IWB10823	52.0308	***	1	2	1	2	1	2	2	1	1	2	1	1	1	1	1	1	1	1	1	2	2	1	2	2	1	2	1	2	2	1	1	1	1	2	1	2	2	1	3	1	2	2	2	2	1
554	1B	IWB10524	52.0308	***	1	2	1	2	1	2	2	1	1	2	1	1	1	1	1	1	1	1	1	2	2	1	2	2	1	2	1	2	2	1	1	1	1	2	1	2	2	1	3	1	2	2	2	2	1
555	1B	IWB7163	52.0308	***	1	2	1	2	1	2	2	1	1	2	1	1	1	1	1	1	1	1	1	2	2	1	2	2	1	2	1	2	2	1	1	1	1	2	1	2	2	1	3	1	2	2	2	2	1
556	1B	IWB72597	52.0308	***	1	2	1	2	1	2	2	1	1	2	1	1	1	1	1	1	1	1	1	2	2	1	2	2	1	2	1	2	2	1	1	1	1	2	1	2	2	1	3	1	2	2	2	2	1
557	1B	IWB70319	52.0308	***	1	2	1	2	1	2	2	1	1	2	1	1	1	1	1	1	1	1	1	2	2	1	2	2	1	2	1	2	2	1	1	1	1	2	1	2	2	1	3	1	2	2	2	2	1
558	1B	IWB69662	52.0308	***	1	2	1	2	1	2	2	1	1	2	1	1	1	1	1	1	1	1	1	2	2	1	2	2	1	2	1	2	2	1	1	1	1	2	1	2	2	1	3	1	2	2	2	2	1
559	1B	IWB62805	52.0308	***	1	2	1	2	1	2	2	1	1	2	1	1	1	1	1	1	1	1	1	2	2	1	2	2	1	2	1	2	2	1	1	1	1	2	1	2	2	1	3	1	2	2	2	2	1
560	1B	IWB40762	52.0308	***	1	2	1	2	1	2	2	1	1	2	1	1	1	1	1	1	1	1	1	2	2	1	2	2	1	2	1	2	2	1	1	1	1	2	1	2	2	1	3	1	2	2	2	2	1
561	1B	IWB41124	52.0308	***	1	2	1	2	1	2	2	1	1	2	1	1	1	1	1	1	1	1	1	2	2	1	2	2	1	2	1	2	2	1	1	1	1	2	1	2	2	1	1	1	2	2	2	2	1
562	1B	IWB8147	52.0308	***	1	2	1	2	1	2	2	1	1	2	1	1	1	1	1	1	1	1	1	2	2	1	2	2	1	2	1	2	2	1	1	1	1	2	1	2	2	1	3	1	2	2	2	2	1
563	1B	IWB35253	52.0308	***	1	2	1	2	1	2	2	1	1	2	1	1	1	1	1	1	1	1	1	2	2	1	2	2	1	2	1	2	2	1	1	1	1	2	1	2	2	1	3	1	2	2	2	2	1
564	1B	IWB69863	52.0308	***	1	2	1	2	1	2	2	1	1	2	1	1	1	1	1	1	1	1	1	2	2	1	2	2	1	2	1	2	2	1	1	1	1	2	1	2	3	1	3	1	2	2	2	2	1
565	1B	IWB55632	52.0308	***	1	2	1	2	1	2	2	1	1	2	1	1	1	1	1	1	1	1	1	2	2	1	2	2	1	2	1	2	2	1	1	3	1	2	1	2	2	1	3	1	2	2	2	2	1
566	1B	IWB27773	52.0308	***	1	2	1	2	1	2	2	1	1	2	1	1	1	1	1	1	1	1	1	2	2	1	2	2	1	2	1	2	2	1	1	3	1	2	1	2	2	1	3	1	2	2	2	2	1
567	1B	IWB56779	52.0308	***	1	2	1	2	1	2	2	1	1	2	1	1	1	1	1	1	1	1	1	2	2	1	2	2	1	2	1	2	2	1	1	3	1	2	1	2	2	1	3	1	2	2	2	2	1
568	1B	IWB75173	52.0308	***	1	2	1	2	1	2	2	1	1	2	1	1	1	1	1	1	1	1	1	2	2	1	2	2	1	2	1	2	2	1	1	3	1	2	1	2	2	1	1	1	2	2	2	2	1
569	1B	IWB34036	52.0308	***	1	2	1	2	1	2	2	1	1	2	1	1	1	1	1	1	1	1	1	2	2	1	2	2	1	2	1	2	2	1	1	3	1	2	1	2	2	1	3	1	2	2	2	2	1
570	1B	IWB221	52.0308	***	1	2	1	2	1	2	2	1	1	2	1	1	1	1	1	1	1	1	1	2	2	1	2	2	1	2	1	2	2	1	1	1	1	2	1	2	2	1	3	1	2	2	2	2	1
571	1B	IWB33215	52.0308	***	1	2	1	2	1	2	2	1	1	2	1	1	1	1	1	1	1	1	1	2	2	1	2	2	1	2	1	2	2	1	1	1	1	2	1	2	2	1	3	1	2	2	2	2	1
572	1B	IWB12485	52.0308	***	1	2	1	2	1	2	2	1	1	2	1	1	1	1	1	1	1	1	1	2	2	1	2	2	1	2	1	2	2	1	1	1	1	2	1	2	2	1	3	1	2	2	2	2	1
573	1B	IWB72861	52.9655	***	1	2	1	2	1	1	2	1	1	2	1	1	1	1	1	1	1	1	1	2	2	1	2	2	1	2	1	2	2	1	1	1	1	2	1	2	2	1	3	1	2	2	2	2	1
574	1B	IWB12547	52.9655	***	1	2	1	2	1	1	2	1	1	2	1	1	1	1	1	1	1	1	1	2	2	1	2	2	1	2	1	2	2	1	1	3	1	2	1	2	2	1	3	1	2	2	2	2	1
575	1B	IWB11829	52.9655	***	1	2	1	2	1	1	2	1	1	2	1	1	1	1	1	1	1	1	1	2	2	1	2	2	1	2	1	2	2	1	1	1	1	2	1	2	2	1	3	1	2	2	2	2	1
576	1B	IWB11830	52.9655	***	1	2	1	2	1	1	2	1	1	2	1	1	1	1	1	1	1	1	1	2	2	1	2	2	1	2	1	2	2	1	1	1	1	2	1	2	2	1	3	1	2	2	2	2	1
577	1B	IWB6392	52.9655	***	1	2	1	2	1	1	2	1	1	2	1	1	1	1	1	1	1	1	1	2	2	1	2	2	1	2	1	2	2	1	1	1	1	2	1	2	2	1	3	1	2	2	2	2	1
578	1B	IWB72596	52.9655	***	1	2	1	2	1	1	2	1	1	2	1	1	1	1	1	1	1	1	1	2	2	1	2	2	1	2	1	2	2	1	1	1	1	2	1	2	2	1	3	1	2	2	2	2	1
579	1B	IWB69550	53.1959	***	1	2	1	2	1	1	2	1	1	2	1	1	1	1	1	1	1	1	1	2	2	1	2	2	1	2	1	2	2	1	1	1	1	2	1	2	2	1	3	1	2	2	2	2	1
580	1B	IWB6900	53.4263	***	1	2	1	2	1	1	2	1	1	2	1	1	1	1	1	1	1	1	1	2	2	1	2	1	1	2	1	2	2	1	1	1	1	2	1	2	2	1	3	1	2	2	2	2	1
581	1B	IWB7939	53.4263	***	1	2	1	2	1	1	2	1	1	2	1	1	1	1	1	1	1	1	1	2	2	1	2	1	1	2	1	2	2	1	1	1	1	2	1	2	2	1	3	1	2	2	2	2	1
582	1B	IWB10997	53.4263	***	1	2	1	2	1	1	2	1	1	2	1	1	1	1	1	1	1	1	1	2	2	1	2	1	1	2	1	2	2	1	1	1	1	2	1	2	2	1	3	1	2	2	2	2	1
583	1B	IWB37703	53.6589	***	1	2	1	2	1	1	2	1	1	2	1	1	1	1	1	1	1	1	1	2	2	1	2	1	1	2	1	2	2	1	1	1	1	2	1	2	2	1	3	1	2	2	2	2	1
584	1B	IWB31964	53.6589	***	1	2	1	2	1	1	2	1	1	2	1	1	1	1	1	1	1	1	1	2	2	1	2	1	1	2	1	2	2	1	1	1	1	2	1	2	2	1	3	1	2	2	2	2	1
585	1B	IWB71872	53.8914	***	1	2	1	2	1	1	2	1	1	2	1	1	1	1	1	1	1	1	1	2	2	1	2	1	1	2	1	2	2	1	1	1	1	2	1	2	2	1	3	1	2	2	2	2	1
586	1B	IWB73189	53.8914	***	1	2	1	2	1	1	2	1	1	2	1	1	1	1	1	1	1	1	1	2	2	1	2	1	1	2	1	2	2	1	1	1	1	2	1	2	2	1	3	1	2	2	2	2	1
587	1B	IWB7028	53.8914	***	1	2	1	2	1	1	2	1	1	2	1	1	1	1	1	1	1	1	1	2	2	1	2	1	1	2	1	2	2	1	1	3	1	2	1	2	2	1	3	1	2	2	2	2	1
588	1B	IWB44638	54.6126	***	1	2	1	2	1	1	2	1	1	2	1	1	1	1	1	1	1	1	1	2	2	1	2	1	1	2	1	2	2	1	1	2	1	2	1	2	2	1	3	1	2	2	2	2	1
589	1B	IWB34453	54.8485	**	1	2	2	2	1	1	2	1	1	2	1	1	1	1	1	1	1	1	1	2	2	1	2	1	1	2	1	2	2	1	1	2	1	2	1	2	2	1	3	1	2	2	2	2	1
590	1B	IWB10646	54.8485	**	1	2	2	2	1	1	2	1	1	2	1	1	1	1	1	1	1	1	1	2	2	1	2	1	1	2	1	2	2	1	1	2	1	2	1	2	2	1	3	1	2	2	2	2	1
591	1B	IWB79804	54.8485	***	1	2	2	2	1	1	2	1	1	2	1	1	1	1	1	1	1	1	1	2	2	1	2	1	1	2	1	2	2	1	1	3	1	2	1	2	2	1	3	1	2	2	2	2	1
592	1B	IWB80556	54.8485	***	1	2	2	2	1	1	2	1	1	2	1	1	1	1	1	1	1	1	1	2	2	1	2	1	1	2	1	2	2	1	1	3	1	2	1	2	2	1	3	1	2	2	2	2	1
593	1B	IWB9703	54.8485	***	1	2	2	2	1	1	2	1	1	2	1	1	1	1	1	1	1	1	1	2	2	1	2	1	1	2	1	2	2	1	1	2	1	2	1	2	2	1	3	1	2	2	2	2	1
594	1B	IWB69155	54.8485	***	1	2	2	2	1	1	2	1	1	2	1	1	1	1	1	1	1	1	1	2	2	1	2	1	1	2	1	2	2	1	1	2	1	2	1	2	2	1	3	1	2	2	2	2	1
595	1B	IWB65091	54.8485	***	1	2	2	2	1	1	2	1	1	2	1	1	1	1	1	1	1	1	1	2	2	1	2	1	1	2	1	2	2	1	1	2	1	2	1	2	2	1	3	1	2	2	2	2	1
596	1B	IWB73167	54.8485	***	1	2	2	2	1	1	2	1	1	2	1	1	1	1	1	1	1	1	1	2	2	1	2	1	1	2	1	2	2	1	1	2	1	2	1	2	2	1	3	1	2	2	2	2	1
597	1B	IWB6921	54.8485	***	1	2	2	2	1	1	2	1	1	2	1	1	1	1	1	1	1	1	1	2	2	1	2	1	1	2	1	2	2	1	1	2	1	2	1	2	2	1	3	1	2	2	2	2	1
598	1B	IWB69585	55.08	***	1	2	1	2	1	1	2	1	1	2	1	1	1	1	1	1	1	1	1	2	2	1	2	1	1	2	1	2	2	1	1	2	1	2	1	2	2	1	3	1	2	2	2	2	1
599	1B	IWB72533	58.3182	*	1	2	1	2	2	1	2	1	1	2	1	1	1	1	1	1	1	1	1	2	2	2	2	1	1	2	1	2	2	1	1	2	1	2	1	2	2	1	1	1	2	2	2	2	1
600	1B	IWB72708	58.7877	*	1	2	1	2	2	1	2	1	1	1	1	1	1	1	1	1	1	1	1	2	2	2	2	1	1	2	1	2	2	1	1	2	1	2	1	2	2	1	1	1	2	2	2	1	1
601	1B	IWB72532	58.7877	*	1	2	1	2	2	1	2	1	1	1	1	1	1	1	1	1	1	1	1	2	2	2	2	1	1	2	1	2	2	1	1	2	1	2	1	2	2	1	1	1	2	2	2	1	1
602	1B	IWB51640	58.7877	*	1	2	1	2	2	1	2	1	1	1	1	1	1	1	1	1	1	1	1	2	2	2	2	1	1	2	1	2	2	1	1	2	1	2	1	2	2	1	1	1	2	2	2	1	1
603	1B	IWB30117	58.7877	*	1	2	1	2	2	1	2	1	1	1	1	1	1	1	1	1	1	1	1	2	2	2	2	1	1	2	1	2	2	1	1	2	1	2	1	2	2	1	1	1	2	2	2	1	1
604	1B	IWB80275	58.7877	*	1	2	1	2	2	1	2	1	1	1	1	1	1	1	1	1	1	1	1	2	2	2	2	1	1	2	1	2	2	1	1	2	1	2	1	2	2	1	1	1	2	2	2	1	1
605	1B	IWB47412	58.7877	*	1	2	1	2	2	1	2	1	1	1	1	1	1	1	1	1	1	1	1	2	2	2	2	1	1	2	1	2	2	1	1	2	1	2	1	2	2	1	1	1	2	2	2	1	1
606	1B	IWB31711	58.7877	*	1	2	1	2	2	1	2	1	1	1	1	1	1	1	1	1	1	1	1	2	2	2	2	1	1	2	1	2	2	1	1	2	1	2	1	2	2	1	1	1	2	2	2	1	1
607	1B	IWB75465	58.7877	*	1	2	1	2	2	1	2	1	1	1	1	1	1	1	1	1	1	1	1	2	2	2	2	1	1	2	1	2	2	1	1	2	1	2	1	2	2	1	1	1	2	2	2	1	1
608	1B	IWB69495	58.7877	*	1	2	1	2	2	1	2	1	1	1	1	1	1	1	1	1	1	1	1	2	2	2	2	1	1	2	1	2	2	1	1	2	1	2	1	2	2	1	1	1	2	2	2	1	1
609	1B	IWB47330	58.7877	*	1	2	1	2	2	1	2	1	1	1	1	1	1	1	1	1	1	1	1	2	2	2	2	1	1	2	1	2	2	1	1	2	1	2	1	2	2	1	1	1	2	2	2	1	1
610	1B	IWB71512	58.7877	*	1	2	1	2	2	1	2	1	1	1	1	1	1	1	1	1	1	1	1	2	2	2	2	1	1	2	1	2	2	1	1	2	1	2	1	2	2	1	1	1	2	2	2	1	1
611	1B	IWB60937	58.7877	*	1	2	1	2	2	1	2	1	1	1	1	1	1	1	1	1	1	1	1	2	2	2	2	1	1	2	1	2	2	1	1	3	1	2	1	2	2	1	1	1	2	2	2	1	1
612	1B	IWB80220	58.7877	*	1	2	1	2	2	1	2	1	1	1	1	1	1	1	1	1	1	1	1	2	2	2	2	1	1	2	1	2	2	1	1	2	1	2	1	2	2	1	1	1	2	2	2	1	1
613	1B	IWB35412	59.255	*	1	2	2	2	2	1	2	1	1	1	1	1	1	1	1	1	1	1	1	2	2	2	2	1	1	2	1	2	2	1	1	2	1	2	1	2	2	1	1	1	2	2	2	1	2
614	1B	IWB61058	59.255	*	1	2	2	2	2	1	2	1	1	1	1	1	1	1	1	1	1	1	1	2	2	2	2	1	1	2	1	2	2	1	1	2	1	2	1	2	2	1	1	1	2	2	2	1	2
615	1B	IWB24627	59.255	*	1	2	2	2	2	1	2	1	1	1	1	1	1	1	1	1	1	1	1	2	2	2	2	1	1	2	1	2	2	1	1	2	1	2	1	2	2	1	1	1	2	2	2	1	2
616	1B	IWB80210	59.255	*	1	2	2	2	2	1	2	1	1	1	1	1	1	1	1	1	1	1	1	2	2	2	2	1	1	2	1	2	2	1	1	2	1	2	1	2	2	1	1	1	2	2	2	1	2
617	1B	IWB63890	59.4876	*	1	2	2	2	2	1	2	1	1	1	1	1	1	1	1	1	1	1	1	2	2	2	2	1	1	2	1	2	2	1	1	2	1	2	1	2	2	1	1	1	2	2	2	1	2
618	1B	IWB60913	59.4876	*	1	2	2	2	2	1	2	1	1	1	1	1	1	1	1	1	1	1	1	2	2	2	2	1	1	2	1	2	2	1	1	2	1	2	1	2	2	1	1	1	2	2	2	1	2
619	1B	IWB65666	59.4876	*	1	2	2	2	2	1	2	1	1	1	1	1	1	1	1	1	1	1	1	2	2	2	2	1	1	2	1	2	2	1	1	3	1	2	1	2	2	1	1	1	2	2	2	1	2
620	1B	IWB72645	59.4876	*	1	2	2	2	2	1	2	1	1	1	1	1	1	1	1	1	1	1	1	2	2	2	2	1	1	2	1	2	2	1	1	3	1	2	1	2	2	1	1	1	2	2	2	1	2
621	1B	IWB29292	59.966	*	1	2	2	2	2	1	2	1	1	1	1	1	3	1	1	1	1	1	1	2	2	2	2	1	1	2	1	2	2	1	1	3	1	2	1	2	2	1	1	1	2	2	2	1	2
622	1B	IWB38741	60.4468	*	1	2	2	2	2	1	2	1	1	1	1	1	3	1	1	1	1	1	1	2	2	2	2	1	1	2	1	2	2	1	1	2	1	2	1	2	2	1	1	1	2	2	2	1	1
623	1B	IWB10576	60.4468	*	1	2	2	2	2	1	2	1	1	1	1	1	1	1	1	1	1	1	1	2	2	2	2	1	1	2	1	2	2	1	1	2	1	2	1	2	2	1	1	1	2	2	2	1	1
624	1B	IWB73928	60.4468	*	1	2	2	2	2	1	2	1	1	1	1	1	1	1	1	1	1	1	1	2	2	2	2	1	1	2	1	2	2	1	1	2	1	2	1	2	2	1	1	1	2	2	2	1	1
625	1B	IWB70166	60.4468	*	1	2	2	2	2	1	2	1	1	1	1	1	1	1	1	1	1	1	1	2	2	2	2	1	1	2	1	2	2	1	1	2	1	2	1	2	2	1	1	1	2	2	2	1	1
626	1B	IWB69973	60.4468	*	1	2	2	2	2	1	2	1	1	1	1	1	1	1	1	1	1	1	1	2	2	2	2	1	1	2	1	2	2	1	1	2	1	2	1	2	2	1	1	1	2	2	2	1	1
627	1B	IWB69772	60.4468	*	1	2	2	2	2	1	2	1	1	1	1	1	1	1	1	1	1	1	1	2	2	2	2	1	1	2	1	2	2	1	1	2	1	2	1	2	2	1	1	1	2	2	2	1	1
628	1B	IWB77688	60.4468	**	1	2	2	2	2	1	2	1	1	1	1	1	1	1	1	1	1	1	1	2	2	2	2	1	1	2	1	2	2	1	1	2	1	2	1	2	2	1	1	1	2	2	2	1	1
629	1B	IWB71511	60.4468	**	1	2	2	2	2	1	2	1	1	1	1	1	1	1	1	1	1	1	1	2	2	2	2	1	1	2	1	2	2	1	1	3	1	2	1	2	2	1	1	1	2	2	2	1	1
630	1B	IWB31673	60.4468	**	1	2	2	2	2	1	2	1	1	1	1	1	1	1	1	1	1	1	1	2	2	2	2	1	1	2	1	2	2	1	1	2	1	2	1	2	2	1	1	1	2	2	2	1	1
631	1B	IWB10445	60.4468	**	1	2	2	2	2	1	2	1	1	1	1	1	1	1	1	1	1	1	1	2	2	2	2	1	1	2	1	2	2	1	1	2	1	2	1	2	2	1	1	1	2	2	2	1	1
632	1B	IWB10714	60.4468	**	1	2	2	2	2	1	2	1	1	1	1	1	1	1	1	1	1	1	1	2	2	2	2	1	1	2	1	2	2	1	1	2	1	2	1	2	2	1	1	1	2	2	2	1	1
633	1B	IWB67838	60.4468	**	1	2	2	2	2	1	2	1	1	1	1	1	1	1	1	1	1	1	1	2	2	2	2	1	1	2	1	2	2	1	1	2	1	2	1	2	2	1	1	1	2	2	2	1	1
634	1B	IWB74185	60.6838	*	1	2	2	2	2	1	2	1	1	1	1	1	1	1	1	1	1	1	1	2	2	2	2	1	1	2	1	2	2	1	1	3	1	2	1	2	2	1	1	1	2	2	2	1	1
635	1B	IWB37331	62.6455	*	1	2	2	2	2	1	2	1	1	1	1	1	1	1	1	1	1	2	2	2	2	2	2	1	1	2	1	2	2	1	1	2	1	2	1	2	2	1	1	2	2	2	2	1	1
636	1B	IWB7324	62.6455	*	1	2	2	2	2	1	2	1	1	1	1	1	1	1	1	1	1	2	2	2	2	2	2	1	1	2	1	2	2	1	1	2	1	2	1	2	2	1	1	2	2	2	2	1	1
637	1B	IWB65731	62.6455	*	1	2	2	2	2	1	2	1	1	1	1	1	1	1	1	1	1	2	2	2	2	2	2	1	1	2	1	2	2	1	1	2	1	2	1	2	2	1	1	2	2	2	2	1	1
638	1B	IWB78189	62.6455	*	1	2	2	2	2	1	2	1	1	1	1	1	1	1	1	1	1	2	2	2	2	2	2	1	1	2	1	2	2	1	1	2	1	2	1	2	2	1	1	2	2	2	2	1	1
639	1B	IWB54760	62.6455	*	1	2	2	2	2	1	2	1	1	1	1	1	1	1	1	1	1	2	2	2	2	2	2	1	1	2	1	2	2	1	1	2	1	2	1	2	2	1	1	2	2	2	2	1	1
640	1B	IWB7183	62.6455	*	1	2	2	2	2	1	2	1	1	1	1	1	1	1	1	1	1	2	2	2	2	2	2	1	1	2	1	2	2	1	1	2	1	2	1	2	2	1	1	2	2	2	2	1	1
641	1B	IWB73484	62.8791	*	1	2	2	2	2	1	2	1	1	1	1	1	1	1	1	1	1	2	2	2	2	2	2	1	1	2	1	2	2	1	1	2	1	2	1	2	2	1	1	2	2	2	2	1	1
642	1B	IWB62507	62.8791	*	1	2	2	2	2	1	2	1	1	1	1	1	1	1	1	1	1	2	2	2	2	2	2	1	1	2	1	2	2	1	1	2	1	2	1	2	2	1	1	2	2	2	2	1	1
643	1B	IWB65754	62.8791		1	2	2	2	2	1	2	1	1	1	1	1	1	1	1	1	1	2	2	2	2	2	2	1	1	2	1	2	2	1	1	2	1	2	1	2	2	1	1	2	2	2	2	1	1
644	1B	IWB35577	62.8791		1	2	2	2	2	1	2	1	1	1	1	1	1	1	1	1	1	2	2	2	2	2	2	1	1	2	1	2	2	1	1	2	1	2	1	2	2	1	1	2	2	2	2	1	1
645	1B	IWB27762	62.8791	*	1	2	2	2	2	1	2	1	1	1	1	1	1	1	1	1	1	2	2	2	2	2	2	1	1	2	1	2	2	1	1	3	1	2	1	2	2	1	1	2	2	2	2	1	1
646	1B	IWB46465	62.8791	*	1	2	2	2	2	1	2	1	1	1	1	1	1	1	1	1	1	2	2	2	2	2	2	1	1	2	1	2	2	1	1	3	1	2	1	2	2	1	1	2	2	2	2	1	1
647	1B	IWB45877	62.8791	*	1	2	2	2	2	1	2	1	1	1	1	1	1	1	1	1	1	2	2	2	2	2	2	1	1	2	1	2	2	1	1	3	1	2	1	2	2	1	1	2	2	2	2	1	1
648	1B	IWB7180	62.8791	*	1	2	2	2	2	1	2	1	1	1	1	1	1	1	1	1	1	2	2	2	2	2	2	1	1	2	1	2	2	1	1	2	1	2	1	2	2	1	1	2	2	2	2	1	1
649	1B	IWB25483	64.3081	*	1	2	2	2	2	1	2	1	1	1	1	1	1	1	1	1	1	2	2	2	2	2	2	2	1	2	1	2	2	1	1	2	1	2	1	2	2	1	1	2	2	2	2	1	1
650	1B	IWB75521	64.3081	*	1	2	2	2	2	1	2	1	1	1	1	1	1	1	1	1	1	2	2	2	2	2	2	2	1	2	1	2	2	1	1	2	1	2	1	2	2	1	1	2	2	2	2	1	1
651	1B	IWB53084	64.3081	*	1	2	2	2	2	1	2	1	1	1	1	1	1	1	1	1	1	2	2	2	2	2	2	2	1	2	1	2	2	1	1	2	1	2	1	2	2	1	1	2	2	2	2	1	1
652	1B	IWB53019	64.3081	*	1	2	2	2	2	1	2	1	1	1	1	1	1	1	1	1	1	2	2	2	2	2	2	2	1	2	1	2	2	1	1	2	1	2	1	2	2	1	1	2	2	2	2	1	1
653	1B	IWB45407	64.3081	*	1	2	2	2	2	1	2	1	1	1	1	1	1	1	1	1	1	2	2	2	2	2	2	2	1	2	1	2	2	1	1	2	1	2	1	2	2	1	1	2	2	2	2	1	1
654	1B	IWB75653	64.3081	*	1	2	2	2	2	1	2	1	1	1	1	1	1	1	1	1	1	2	2	2	2	2	2	2	1	2	1	2	2	1	1	2	1	2	1	2	2	1	1	2	2	2	2	1	1
655	1B	IWB57335	64.3081	*	1	2	2	2	2	1	2	1	1	1	1	1	1	1	1	1	1	2	2	2	2	2	2	2	1	2	1	2	2	1	1	2	1	2	1	2	2	1	1	2	2	2	2	1	1
656	1B	IWB4238	64.7798	*	1	2	2	2	2	1	2	1	1	1	1	1	1	1	1	1	1	2	2	2	2	2	2	2	1	2	1	2	2	1	1	2	1	2	1	2	2	1	1	2	2	2	2	1	1
657	1B	IWB775	65.0123		1	2	2	2	2	1	2	1	1	1	1	1	1	1	1	1	1	2	2	2	2	2	2	2	1	2	1	2	2	1	1	2	1	2	1	2	2	1	1	2	2	2	2	1	1
658	1B	IWB80238	65.0123		1	2	2	2	2	1	2	1	1	1	1	1	1	1	1	1	1	2	2	2	2	2	2	2	1	2	1	2	2	1	1	2	1	2	1	2	2	1	1	2	2	2	2	1	1
659	1B	IWB7286	65.0123		1	2	2	2	2	1	2	1	1	1	1	1	1	1	1	1	1	2	2	2	2	2	2	2	1	2	1	2	2	1	1	2	1	2	1	2	2	1	1	2	2	2	2	1	1
660	1B	IWB72498	65.0123		1	2	2	2	2	1	2	1	1	1	1	1	1	1	1	1	1	2	2	2	2	2	2	2	1	2	1	2	2	1	1	2	1	2	1	2	2	1	1	2	2	2	2	1	1
661	1B	IWB66204	65.0123		1	2	2	2	2	1	2	1	1	1	1	1	1	1	1	1	1	2	2	2	2	2	2	2	1	2	1	2	2	1	1	2	1	2	1	2	2	1	1	2	2	2	2	1	1
662	1B	IWB6916	65.2449		1	2	2	2	2	1	2	1	1	1	1	1	1	1	1	1	1	2	2	2	2	2	2	2	1	2	1	2	2	1	1	2	2	2	1	2	2	1	1	2	2	2	2	1	1
663	1B	IWB72619	65.2449		1	2	2	2	2	1	2	1	1	1	1	1	1	1	1	1	1	2	2	2	2	2	2	2	1	2	1	2	2	1	1	2	2	2	1	2	2	1	1	2	2	2	2	1	1
664	1B	IWB70777	65.2449		1	2	2	2	2	1	2	1	1	1	1	1	1	1	1	1	1	2	2	2	2	2	2	2	1	2	1	2	2	1	1	2	2	2	1	2	2	1	1	2	2	2	2	1	1
665	1B	IWB72962	65.2449		1	2	2	2	2	1	2	1	1	1	1	1	3	1	1	1	1	2	2	2	2	2	2	2	1	2	1	2	2	1	1	2	2	2	1	2	2	1	1	2	2	2	2	1	1
666	1B	IWB7684	65.2449		1	2	2	2	2	1	2	1	1	1	1	1	1	1	1	1	1	2	2	2	2	2	2	2	1	2	1	2	2	1	1	2	2	2	1	2	2	1	1	2	2	2	2	1	1
667	1B	IWB78392	66.667		1	2	2	2	2	1	2	1	1	1	1	1	1	1	1	1	1	2	2	2	2	2	2	2	1	2	1	2	2	1	1	2	2	2	1	2	2	1	1	2	2	2	2	1	1
668	1B	IWB80881	66.667		1	2	2	2	2	1	2	1	1	1	1	1	1	1	1	1	1	2	2	2	2	2	2	2	1	2	1	2	2	1	1	2	2	2	1	2	2	1	1	2	2	2	2	1	1
669	1B	IWB29900	66.667		1	2	2	2	2	1	2	1	1	1	1	1	1	1	1	1	1	2	2	2	2	2	2	2	1	2	1	2	2	1	1	2	2	2	1	2	2	1	1	2	2	2	2	1	1
670	1B	IWB50909	66.667		1	2	2	2	2	1	2	1	1	1	1	1	1	1	1	1	1	2	2	2	2	2	2	2	1	2	1	2	2	1	1	2	2	2	1	2	2	1	1	2	2	2	2	1	1
671	1B	IWB80397	66.667		1	2	2	2	2	1	2	1	1	1	1	1	1	1	1	1	1	2	2	2	2	2	2	2	1	2	1	2	2	1	1	2	2	2	1	2	2	1	1	2	2	2	2	1	1
672	1B	IWB60063	66.8985		1	2	2	2	2	1	2	1	1	1	1	1	1	1	1	1	1	2	2	2	2	2	2	2	1	2	1	2	2	1	1	2	2	2	1	2	2	1	1	2	2	2	2	1	1
673	1B	IWB42604	66.8985		1	2	2	2	2	1	2	1	1	1	1	1	1	1	1	1	1	2	2	2	2	2	2	2	1	2	1	2	2	1	1	2	2	2	1	2	2	1	1	2	2	2	2	1	1
674	1B	IWB10630	66.8985		1	2	2	2	2	1	2	1	1	1	1	1	1	1	1	1	1	2	2	2	2	2	2	2	1	2	1	2	2	1	1	2	2	2	1	2	2	1	1	2	2	2	2	1	1
675	1B	IWB72078	66.8985		1	2	2	2	2	1	2	1	1	1	1	1	1	1	1	1	1	2	2	2	2	2	2	2	1	2	1	2	2	1	1	2	2	2	1	2	2	1	1	2	2	2	2	1	1
676	1B	IWB52413	66.8985		1	2	2	2	2	1	2	1	1	1	1	1	1	1	1	1	1	2	2	2	2	2	2	2	1	2	1	2	2	1	1	2	2	2	1	2	2	1	1	2	2	2	2	1	1
677	1B	IWB13774	66.8985	*	1	2	2	2	2	1	2	1	1	1	1	1	1	1	1	1	1	2	2	2	2	2	2	2	1	2	1	2	2	1	1	2	2	2	1	2	2	1	1	2	2	2	2	1	1
678	1B	IWB13397	68.5899	*	1	2	2	2	2	1	2	1	1	1	1	2	1	1	1	1	1	2	2	2	2	2	2	2	1	2	1	2	2	1	1	2	2	2	1	2	2	1	1	2	2	2	2	1	1
679	1B	IWB9661	68.5899	*	1	2	2	2	2	1	2	1	1	1	1	2	1	1	1	1	1	2	2	2	2	2	2	2	1	2	1	2	2	1	1	2	2	2	1	2	2	1	1	2	2	2	2	1	1
680	1B	IWB2041	68.5899	*	1	2	2	2	2	1	2	1	1	1	1	2	1	1	1	1	1	2	2	2	2	2	2	2	1	2	1	2	2	1	1	2	2	2	1	2	2	1	1	2	2	2	2	1	1
681	1B	IWB36395	70.0189	*	1	2	2	2	2	1	2	1	1	1	1	2	1	2	1	1	1	2	2	2	2	2	2	2	1	2	1	2	2	1	1	2	2	2	1	2	2	1	1	2	2	2	2	1	1
682	1B	IWB19579	70.0189	*	1	2	2	2	2	1	2	1	1	1	1	2	1	2	1	1	1	2	2	2	2	2	2	2	1	2	1	2	2	1	1	3	2	2	1	2	2	1	1	2	2	2	2	1	1
683	1B	IWB36392	70.0189		1	2	2	2	2	1	2	1	1	1	1	2	1	2	1	1	1	2	2	2	2	2	2	2	1	2	1	2	2	1	1	2	2	2	1	2	2	1	1	2	2	2	2	1	1
684	1B	IWB63416	70.0189	*	1	2	2	2	2	1	2	1	1	1	1	2	1	2	1	1	1	2	2	2	2	2	2	2	1	2	1	2	2	1	1	3	2	2	1	2	2	1	1	2	2	2	2	1	1
685	1B	IWB35683	70.0189	*	1	2	2	2	2	1	2	1	1	1	1	2	1	2	1	1	1	2	2	2	2	2	2	2	1	2	1	2	2	1	1	3	2	2	1	2	2	1	1	2	2	2	2	1	1
686	1B	IWB60940	70.0189	*	1	2	2	2	2	1	2	1	1	1	1	2	1	2	1	1	1	2	2	2	2	2	2	2	1	2	1	2	2	1	1	3	2	2	1	2	2	1	1	2	2	2	2	1	1
687	1B	IWB30074	70.0189	*	1	2	2	2	2	1	2	1	1	1	1	2	1	2	1	1	1	2	2	2	2	2	2	2	1	2	1	2	2	1	1	3	2	2	1	2	2	1	1	2	2	2	2	1	1
688	1B	IWB6174	70.0189	*	1	2	2	2	2	1	2	1	1	1	1	2	1	2	1	1	1	2	2	2	2	2	2	2	1	2	1	2	2	1	1	3	2	2	1	2	2	1	1	2	2	2	2	1	1
689	1B	IWB43475	70.0189	*	1	2	2	2	2	1	2	1	1	1	1	2	1	2	1	1	1	2	2	2	2	2	2	2	1	2	1	2	2	1	1	3	2	2	1	2	2	1	1	2	2	2	2	1	1
690	1B	IWB52353	70.0189	*	1	2	2	2	2	1	2	1	1	1	1	2	1	2	1	1	1	2	2	2	2	2	2	2	1	2	1	2	2	1	1	2	2	2	1	2	2	1	1	2	2	2	2	1	1
691	1B	IWB36348	70.0189	*	1	2	2	2	2	1	2	1	1	1	1	2	1	2	1	1	1	2	2	2	2	2	2	2	1	2	1	2	2	1	1	2	2	2	1	2	2	1	1	2	2	2	2	1	1
692	1B	IWB43476	70.0189		1	2	2	2	2	1	2	1	1	1	1	2	1	2	1	1	1	2	2	2	2	2	2	2	1	2	1	2	2	1	1	2	2	2	1	2	2	1	1	2	2	2	2	1	1
693	1B	IWB26949	70.0189	*	1	2	2	2	2	1	2	1	1	1	1	2	1	2	1	1	1	2	2	2	2	2	2	2	1	2	1	2	2	1	1	2	2	2	1	2	2	1	1	2	2	2	2	1	1
694	1B	IWB73734	70.0189	*	1	2	2	2	2	1	2	1	1	1	1	2	1	2	1	1	1	2	2	2	2	2	2	2	1	2	1	2	2	1	1	2	2	2	1	2	2	1	1	2	2	2	2	1	1
695	1B	IWB30464	70.0189	*	1	2	2	2	2	1	2	1	1	1	1	2	1	2	1	1	1	2	2	2	2	2	2	2	1	2	1	2	2	1	1	2	2	2	1	2	2	1	1	2	2	2	2	1	1
696	1B	IWB62019	70.0189	*	1	2	2	2	2	1	2	1	1	1	1	2	1	2	1	1	1	2	2	2	2	2	2	2	1	2	1	2	2	1	1	2	2	2	1	2	2	1	1	2	2	2	2	1	1
697	1B	IWB859	70.0189	*	1	2	2	2	2	1	2	1	1	1	1	2	1	2	1	1	1	2	2	2	2	2	2	2	1	2	1	2	2	1	1	2	2	2	1	2	2	1	1	2	2	2	2	1	1
698	1B	IWB79461	70.0189	*	1	2	2	2	2	1	2	1	1	1	1	2	1	2	1	1	1	2	2	2	2	2	2	2	1	2	1	2	2	1	1	2	2	2	1	2	2	1	1	2	2	2	2	1	1
699	1B	IWB79618	70.0189	*	1	2	2	2	2	1	2	1	1	1	1	2	1	2	1	1	1	2	2	2	2	2	2	2	1	2	1	2	2	1	1	2	2	2	1	2	2	1	1	2	2	2	2	1	1
700	1B	IWB24077	70.0189	*	1	2	2	2	2	1	2	1	1	1	1	2	1	2	1	1	1	2	2	2	2	2	2	2	1	2	1	2	2	1	1	2	2	2	1	2	2	1	1	2	2	2	2	1	1
701	1B	IWB6215	70.0189	*	1	2	2	2	2	1	2	1	1	1	1	2	1	2	1	1	1	2	2	2	2	2	2	2	1	2	1	2	2	1	1	2	2	2	1	2	2	1	1	2	2	2	2	1	1
702	1B	IWB48944	70.0189	*	1	2	2	2	2	1	2	1	1	1	1	2	1	2	1	1	1	2	2	2	2	2	2	2	1	2	1	2	2	1	1	2	2	2	1	2	2	1	1	2	2	2	2	1	1
703	1B	IWB26948	70.0189	*	1	2	2	2	2	1	2	1	1	1	1	2	1	2	1	1	1	2	2	2	2	2	2	2	1	2	1	2	2	1	1	2	2	2	1	2	2	1	1	2	2	2	2	1	1
704	1B	IWB5588	70.0189	*	1	2	2	2	2	1	2	1	1	1	1	2	1	2	1	1	1	2	2	2	2	2	2	2	1	2	1	2	2	1	1	2	2	2	1	2	2	1	1	2	2	2	2	1	1
705	1B	IWB44429	70.7166	*	1	2	2	2	2	1	2	1	1	1	1	2	1	2	1	1	1	2	2	2	2	2	2	2	1	2	2	2	2	1	1	2	2	2	1	2	2	1	1	2	2	2	2	1	1
706	1B	IWB64848	70.7166		1	2	2	2	2	1	2	1	1	1	1	2	1	2	1	1	1	2	2	2	2	2	2	2	1	2	2	2	2	1	1	2	2	2	1	2	2	1	1	2	2	2	2	1	1
707	1B	IWB13836	70.7166	*	1	2	2	2	2	1	2	1	1	1	1	2	1	2	1	1	1	2	2	2	2	2	2	2	1	2	2	2	2	1	1	3	2	2	1	2	2	1	1	2	2	2	2	1	1
708	1B	IWB70733	70.7166		1	2	2	2	2	1	2	1	1	1	1	2	1	2	1	1	1	2	2	2	2	2	2	2	1	2	2	2	2	1	1	3	2	2	1	2	2	1	1	2	2	2	2	1	1
709	1B	IWB13176	70.7166		1	2	2	2	2	1	2	1	1	1	1	2	1	2	1	1	1	2	2	2	2	2	2	2	1	2	2	2	2	1	1	2	2	2	1	2	2	1	1	2	2	2	2	1	1
710	1B	IWB47566	71.9016		1	2	2	2	2	1	2	1	1	1	1	2	1	2	2	1	1	2	2	2	2	2	2	2	1	2	2	2	2	1	1	2	2	2	1	2	2	1	1	2	2	2	2	1	1
711	1B	IWB9693	71.9016		1	2	2	2	2	1	2	1	1	1	1	2	1	2	2	1	1	2	2	2	2	2	2	2	1	2	2	2	2	1	1	2	2	2	1	2	2	1	1	2	2	2	2	1	1
712	1B	IWB75690	71.9016		1	2	2	2	2	1	2	1	1	1	1	2	1	2	2	1	1	2	2	2	2	2	2	2	1	2	2	2	2	1	1	2	2	2	1	2	2	1	1	2	2	2	2	1	1
713	1B	IWB13393	72.3689		2	2	2	2	2	1	2	1	1	1	1	2	1	2	2	1	1	2	2	2	2	2	2	2	1	2	2	2	2	1	1	2	2	2	1	2	2	1	1	2	2	2	2	1	1
714	1B	IWB76106	72.3689		2	2	2	2	2	1	2	1	1	1	1	2	1	2	2	1	1	2	2	2	2	2	2	2	1	2	2	2	2	1	1	2	2	2	1	2	2	1	1	2	2	2	2	1	1
715	1B	IWB14729	72.3689		2	2	2	2	2	1	2	1	1	1	1	2	1	2	2	1	1	2	2	2	2	2	2	2	1	2	2	2	2	1	1	3	2	2	1	2	2	1	1	2	2	2	2	1	1
716	1B	IWB75880	72.3689		2	2	2	2	2	1	2	1	1	1	1	2	1	2	2	1	1	2	2	2	2	2	2	2	1	2	2	2	2	1	1	2	2	2	1	2	2	1	1	2	2	2	2	1	1
717	1B	IWB78762	72.6015		2	2	2	2	2	1	2	1	1	1	1	2	1	2	2	1	1	2	2	2	2	2	2	2	1	2	2	2	2	1	1	2	2	2	1	2	2	1	1	2	2	2	2	1	1
718	1B	IWB75708	72.6015		2	2	2	2	2	1	2	1	1	1	1	2	1	2	2	1	1	2	2	2	2	2	2	2	1	2	2	2	2	1	1	2	2	2	1	2	2	1	1	2	2	2	2	1	1
719	1B	IWB31909	72.6015		2	2	2	2	2	1	2	1	1	1	1	2	1	2	2	1	1	2	2	2	2	2	2	2	1	2	2	2	2	1	1	3	2	2	1	2	2	1	1	2	2	2	2	1	1
720	1B	IWB8507	72.6015		2	2	2	2	2	1	2	1	1	1	1	2	1	2	2	1	1	2	2	2	2	2	2	2	1	2	2	2	2	1	1	2	2	2	1	2	2	1	1	2	2	2	2	1	1
721	1B	IWB78763	72.6015		2	2	2	2	2	1	2	1	1	1	1	2	1	2	2	1	1	2	2	2	2	2	2	2	1	2	2	2	2	1	1	2	2	2	1	2	2	1	1	2	2	2	2	1	1
722	1B	IWB71192	73.0666		2	2	2	2	2	1	2	1	1	1	1	2	1	2	2	1	1	2	2	2	2	2	2	2	1	2	2	2	2	1	1	2	2	2	1	2	2	1	1	2	2	2	2	1	1
723	1B	IWB10226	73.298		2	2	2	2	2	1	2	1	1	1	1	2	1	2	2	1	1	2	2	2	2	2	2	2	1	2	2	2	2	1	1	2	2	2	3	2	2	1	1	2	2	2	2	1	1
724	1B	IWB39932	73.298		2	2	2	2	2	1	2	1	1	1	1	2	1	2	2	1	1	2	2	2	2	2	2	2	1	2	2	2	2	1	1	2	2	2	3	2	2	1	1	2	2	2	2	1	1
725	1B	IWB47303	73.298		2	2	2	2	2	1	2	1	1	1	1	2	1	2	2	1	1	2	2	2	2	2	2	2	1	2	2	2	2	1	1	2	2	2	3	2	2	1	1	2	2	2	2	1	1
726	1B	IWB73005	73.298		2	2	2	2	2	1	2	1	1	1	1	2	1	2	2	1	1	2	2	2	2	2	2	2	1	2	2	2	2	1	1	2	2	2	3	2	2	1	1	2	2	2	2	1	1
727	1B	IWB26560	73.298		2	2	2	2	2	1	2	1	1	1	1	2	1	2	2	1	1	2	2	2	2	2	2	2	1	2	2	2	2	1	1	2	2	2	3	2	2	1	1	2	2	2	2	1	1
728	1B	IWB34737	73.298		2	2	2	2	2	1	2	1	1	1	1	2	1	2	2	1	1	2	2	2	2	2	2	2	1	2	2	2	2	1	1	2	2	2	3	2	2	1	1	2	2	2	2	1	1
729	1B	IWB42085	73.298		2	2	2	2	2	1	2	1	1	1	1	2	1	2	2	1	1	2	2	2	2	2	2	2	1	2	2	2	2	1	1	2	2	2	3	2	2	1	1	2	2	2	2	1	1
730	1B	IWB53061	73.298		2	2	2	2	2	1	2	1	1	1	1	2	1	2	2	1	1	2	2	2	2	2	2	2	1	2	2	2	2	1	1	2	2	2	3	2	2	1	1	2	2	2	2	1	1
731	1B	IWB73745	73.298		2	2	2	2	2	1	2	1	1	1	1	2	1	2	2	1	1	2	2	2	2	2	2	2	1	2	2	2	2	1	1	2	2	2	3	2	2	1	1	2	2	2	2	1	1
732	1B	IWB78342	73.298		2	2	2	2	2	1	2	1	1	1	1	2	1	2	2	1	1	2	2	2	2	2	2	2	1	2	2	2	2	1	1	2	2	2	3	2	2	1	1	2	2	2	2	1	1
733	1B	IWB36064	73.298		2	2	2	2	2	1	2	1	1	1	1	2	1	2	2	1	1	2	2	2	2	2	2	2	1	2	2	2	2	1	1	2	2	2	3	2	2	1	1	2	2	2	2	1	1
734	1B	IWB39291	73.298		2	2	2	2	2	1	2	1	1	1	1	2	1	2	2	1	1	2	2	2	2	2	2	2	1	2	2	2	2	1	1	2	2	2	3	2	2	1	1	2	2	2	2	1	1
735	1B	IWB40124	73.298		2	2	2	2	2	1	2	1	1	1	1	2	1	2	2	1	1	2	2	2	2	2	2	2	1	2	2	2	2	1	1	2	2	2	3	2	2	1	1	2	2	2	2	1	1
736	1B	IWB40176	73.298		2	2	2	2	2	1	2	1	1	1	1	2	1	2	2	1	1	2	2	2	2	2	2	2	1	2	2	2	2	1	1	2	2	2	1	2	2	1	1	2	2	2	2	1	1
737	1B	IWB71347	73.298		2	2	2	2	2	1	2	1	1	1	1	2	1	2	2	1	1	2	2	2	2	2	2	2	1	2	2	2	2	1	1	2	2	2	3	2	2	1	1	2	2	2	2	1	1
738	1B	IWB71530	73.298		2	2	2	2	2	1	2	1	1	1	1	2	1	2	2	1	1	2	2	2	2	2	2	2	1	2	2	2	2	1	1	2	2	2	3	2	2	1	1	2	2	2	2	1	1
739	1B	IWB39290	73.298		2	2	2	2	2	1	2	1	1	1	1	2	1	2	2	1	1	2	2	2	2	2	2	2	1	2	2	2	2	1	1	2	2	2	3	2	2	1	1	2	2	2	2	1	1
740	1B	IWB27292	73.298		2	2	2	2	2	1	2	1	1	1	1	2	1	2	2	1	1	2	2	2	2	2	2	2	1	2	2	2	2	1	1	2	2	2	3	2	2	1	1	2	2	2	2	1	1
741	1B	IWB32500	73.298		2	2	2	2	2	1	2	1	1	1	1	2	1	2	2	1	1	2	2	2	2	2	2	2	1	2	2	2	2	1	1	2	2	2	3	2	2	1	1	2	2	2	2	1	1
742	1B	IWB35192	73.298		2	2	2	2	2	1	2	1	1	1	1	2	1	2	2	1	1	2	2	2	2	2	2	2	1	2	2	2	2	1	1	2	2	2	3	2	2	1	1	2	2	2	2	1	1
743	1B	IWB36985	73.298		2	2	2	2	2	1	2	1	1	1	1	2	1	2	2	1	1	2	2	2	2	2	2	2	1	2	2	2	2	1	1	2	2	2	3	2	2	1	1	2	2	2	2	1	1
744	1B	IWB39431	73.298		2	2	2	2	2	1	2	1	1	1	1	2	1	2	2	1	1	2	2	2	2	2	2	2	1	2	2	2	2	1	1	2	2	2	3	2	2	1	1	2	2	2	2	1	1
745	1B	IWB56695	73.298		2	2	2	2	2	1	2	1	1	1	1	2	1	2	2	1	1	2	2	2	2	2	2	2	1	2	2	2	2	1	1	2	2	2	3	2	2	1	1	2	2	2	2	1	1
746	1B	IWB72079	73.298		2	2	2	2	2	1	2	1	1	1	1	2	1	2	2	1	1	2	2	2	2	2	2	2	1	2	2	2	2	1	1	2	2	2	3	2	2	1	1	2	2	2	2	1	1
747	1B	IWB76607	73.298		2	2	2	2	2	1	2	1	1	1	1	2	1	2	2	1	1	2	2	2	2	2	2	2	1	2	2	2	2	1	1	2	2	2	2	2	2	1	1	2	2	2	2	1	1
748	1B	IWB34917	73.298		2	2	2	2	2	1	2	1	1	1	1	2	1	2	2	1	1	2	2	2	2	2	2	2	1	2	2	2	2	1	1	3	2	2	2	2	2	1	1	2	2	2	2	1	1
749	1B	IWB46357	73.298		2	2	2	2	2	1	2	1	1	1	1	2	1	2	2	1	1	2	2	2	2	2	2	2	1	2	2	2	2	1	1	3	2	2	2	2	2	1	1	2	2	2	2	1	1
750	1B	IWB23054	73.298		2	2	2	2	2	1	2	1	1	1	1	2	1	2	2	1	1	2	2	2	2	2	2	2	1	2	2	2	2	1	1	3	2	2	3	2	2	1	1	2	2	2	2	1	1
751	1B	IWB57391	73.298		2	2	2	2	2	1	2	1	1	1	1	2	1	2	2	1	1	2	2	2	2	2	2	2	1	2	2	2	2	1	1	3	2	2	3	2	2	1	1	2	2	2	2	1	1
752	1B	IWB79845	73.298		2	2	2	2	3	1	2	1	1	1	1	2	1	2	2	1	1	2	2	2	2	2	2	2	1	2	2	2	2	1	1	2	2	2	3	2	2	1	1	2	2	2	2	1	1
753	1B	IWB79775	73.298		2	2	2	2	2	1	2	1	1	1	1	2	1	2	2	1	1	2	2	2	2	2	2	2	1	2	2	2	2	1	1	2	2	2	3	2	2	1	1	2	2	2	2	1	1
754	1B	IWB71355	73.298		2	2	2	2	2	1	2	1	1	1	1	2	1	2	2	1	1	2	2	2	2	2	2	2	1	2	2	2	2	1	1	2	2	2	3	2	2	1	1	2	2	2	2	1	1
755	1B	IWB35474	73.298		2	2	2	2	2	1	2	3	1	1	1	2	1	2	2	1	1	2	2	2	2	2	2	2	1	2	2	2	2	1	1	2	2	2	3	2	2	1	1	2	2	2	2	1	1
756	1B	IWB71353	73.298		2	2	2	2	2	1	2	1	1	1	1	2	1	2	2	1	1	2	2	2	2	2	2	2	1	2	2	2	2	1	1	3	2	2	3	2	2	1	1	2	2	2	2	1	1
757	1B	IWB73004	73.298		2	2	2	2	2	1	2	1	1	1	1	2	1	2	2	1	1	2	2	2	2	2	2	2	1	2	2	2	2	1	1	2	2	2	3	2	2	1	1	2	2	2	2	1	1
758	1B	IWB41967	73.298		2	2	2	2	2	1	2	1	1	1	1	3	1	2	2	1	1	2	2	2	2	2	2	2	1	2	2	2	2	1	1	3	2	2	1	2	2	1	1	2	2	2	2	1	1
759	1B	IWB68968	73.298		2	2	2	2	2	1	2	1	1	1	1	2	1	2	2	1	1	2	2	2	2	2	2	2	1	2	2	2	2	1	1	3	2	2	3	2	2	1	1	2	2	2	2	1	1
760	1B	IWB61864	73.298		2	2	2	2	2	1	2	1	1	1	1	2	1	2	2	1	1	2	2	2	2	2	2	2	1	2	2	2	2	1	1	2	2	2	3	2	2	1	1	2	2	2	2	1	1
761	1B	IWB11968	74.0023		2	2	2	2	2	1	2	1	1	1	1	2	1	2	2	1	1	2	2	2	2	2	2	2	1	2	2	2	2	1	1	2	2	2	3	2	2	1	1	2	2	2	2	1	1
762	1B	IWB71350	75.1873		2	2	2	2	1	1	2	1	1	1	1	2	1	2	2	1	1	2	2	2	2	2	2	2	1	2	2	2	2	1	1	2	2	2	3	2	2	1	1	2	2	1	2	1	1
763	1B	IWB77185	75.1873		2	2	2	2	1	1	2	1	1	1	1	2	1	2	2	1	1	2	2	2	2	2	2	2	1	2	2	2	2	1	1	2	2	2	3	2	2	1	1	2	2	1	2	1	1
764	1B	IWB49534	75.1873		2	2	2	2	1	1	2	1	1	1	1	2	1	2	2	1	1	2	2	2	2	2	2	2	1	2	2	2	2	1	1	2	2	2	3	2	2	1	1	2	2	1	2	1	1
765	1B	IWB73964	75.4188		2	2	2	2	1	1	2	1	1	1	1	2	1	2	2	1	1	2	2	2	2	2	2	2	1	2	2	2	2	1	1	2	2	2	3	2	2	1	1	2	2	1	2	1	1
766	1B	IWB10196	75.4188		2	2	2	2	1	1	2	1	1	1	1	2	1	2	2	1	1	2	2	2	2	2	2	2	1	2	2	2	2	1	1	2	2	2	3	2	2	1	1	2	2	1	2	1	1
767	1B	IWB75762	75.4188		2	2	2	2	1	1	2	1	1	1	1	2	1	2	2	1	1	2	2	2	2	2	2	2	1	2	2	2	2	1	1	2	2	2	3	2	2	1	1	2	2	1	2	1	1
768	1B	IWB79011	75.6558		2	2	2	2	1	1	2	1	1	1	1	2	1	2	2	1	1	2	2	2	2	2	2	2	1	2	2	2	2	1	1	2	2	2	3	2	2	1	1	2	2	1	2	1	1
769	1B	IWB11261	76.132		2	1	2	2	1	1	2	1	1	1	1	2	1	2	2	1	1	2	2	2	2	2	2	2	1	2	2	2	2	1	1	2	2	2	3	2	2	1	1	2	2	1	2	1	1
770	1B	IWB5184	76.132		2	1	2	2	1	1	2	1	1	1	1	2	1	2	2	1	1	2	2	2	2	2	2	2	1	2	2	2	2	1	1	2	2	2	3	2	2	1	1	2	2	1	2	1	1
771	1B	IWB4734	76.132		2	1	2	2	1	1	2	1	1	1	1	2	1	2	2	1	1	2	2	2	2	2	2	2	1	2	2	2	2	1	1	2	2	2	3	2	2	1	1	2	2	1	2	1	1
772	1B	IWB30252	76.132		2	1	2	2	1	1	2	1	1	1	1	2	1	2	2	1	1	2	2	2	2	2	2	2	1	2	2	2	2	1	1	2	2	2	3	2	2	1	1	2	2	1	2	1	1
773	1B	IWB28518	76.132		2	1	2	2	1	1	2	1	1	1	1	2	1	2	2	1	1	2	2	2	2	2	2	2	1	2	2	2	2	1	1	2	2	2	3	2	2	1	1	2	2	1	2	1	1
774	1B	IWB12327	76.3634		2	1	2	2	1	1	2	1	1	1	1	2	1	2	2	1	1	2	2	2	2	2	2	2	1	2	2	2	2	1	1	2	2	2	3	2	2	1	1	2	2	1	2	1	1
775	1B	IWB24205	76.3634		2	1	2	2	1	1	2	1	1	1	1	2	1	2	2	1	1	2	2	2	2	2	2	2	1	2	2	2	2	1	1	3	2	2	3	2	2	1	1	2	2	1	2	1	1
776	1B	IWB73016	76.3634		2	1	2	2	1	1	2	1	1	1	1	2	1	2	2	1	1	2	2	2	2	2	2	2	1	2	2	2	2	1	1	3	2	2	3	2	2	1	1	2	2	1	2	1	1
777	1B	IWB43583	76.596		2	1	2	2	1	1	2	1	1	1	1	2	1	2	2	1	1	2	2	2	2	2	2	2	1	2	2	2	2	1	1	2	2	2	3	2	2	1	1	2	2	1	2	1	1
778	1B	IWB73024	76.8286		2	1	2	2	1	1	2	1	1	1	1	2	1	2	2	1	1	2	2	2	2	2	2	2	1	2	2	2	2	1	1	2	2	2	3	2	2	1	1	2	2	1	2	1	1
779	1B	IWB35103	77.0611		2	1	2	2	1	1	2	1	1	1	1	2	1	2	2	1	1	2	2	2	2	2	2	2	1	2	2	2	2	1	1	2	2	2	2	2	2	1	1	2	2	1	2	1	1
780	1B	IWB36357	77.0611		2	1	2	2	1	1	2	1	1	1	1	2	1	2	2	1	1	2	2	2	2	2	2	2	1	2	2	2	2	1	1	2	2	2	3	2	2	1	1	2	2	1	2	1	1
781	1B	IWB27112	77.0611		2	1	2	2	1	1	2	1	1	1	1	2	1	2	2	1	1	2	2	2	2	2	2	2	1	2	2	2	2	1	1	2	2	2	1	2	2	1	1	2	2	1	2	1	1
782	1B	IWB11544	77.0611		2	1	2	2	1	1	2	1	1	1	1	2	1	2	2	1	1	2	2	2	2	2	2	2	1	2	2	2	2	1	1	2	2	2	3	2	2	1	1	2	2	1	2	1	1
783	1B	IWB71596	77.0611		2	1	2	2	1	1	2	1	1	1	1	2	1	2	2	1	1	2	2	2	2	2	2	2	1	2	2	2	2	1	1	2	2	2	3	2	2	1	1	2	2	1	2	1	1
784	1B	IWB49695	77.0611		2	1	2	2	1	1	2	1	1	1	1	2	1	2	2	1	1	2	2	2	2	2	2	2	1	2	2	2	2	1	1	2	2	2	1	2	2	1	1	2	2	1	2	1	1
785	1B	IWB9175	77.0611		2	1	2	2	1	1	2	1	1	1	1	2	1	2	2	1	1	2	2	2	2	2	2	2	1	2	2	2	2	1	1	2	2	2	3	2	2	1	1	2	2	1	2	1	1
786	1B	IWB49611	77.0611		2	1	2	2	1	1	2	1	1	1	1	2	1	2	2	1	1	2	2	2	2	2	2	2	1	2	2	2	2	1	1	2	2	2	2	2	2	1	1	2	2	1	2	1	1
787	1B	IWB5796	78.235		2	1	2	1	1	1	2	1	1	1	1	2	1	2	2	1	1	2	2	2	2	2	2	2	1	2	2	2	2	1	1	2	2	2	3	2	2	1	1	2	2	1	2	1	1
788	1B	IWB45575	78.235		2	1	2	1	1	1	2	1	1	1	1	2	1	2	2	1	1	2	2	2	2	2	2	2	1	2	2	2	2	1	1	3	2	2	3	2	2	1	1	2	2	1	2	1	1
789	1B	IWB77987	78.235		2	1	2	1	1	1	2	1	1	1	1	2	1	2	2	1	1	2	2	2	2	2	2	2	1	2	2	2	2	1	1	3	2	2	3	2	2	1	1	2	2	1	2	1	1
790	1B	IWB22186	79.2013	*	2	1	2	1	1	1	2	1	1	1	1	2	1	2	2	1	1	2	2	2	2	1	1	2	1	2	2	2	2	1	1	2	2	2	1	2	2	1	1	2	2	1	2	1	1
791	1B	IWB9482	79.436	*	2	1	2	1	1	1	2	1	1	1	1	2	1	2	2	1	1	2	2	2	2	1	1	2	1	2	2	2	2	1	1	2	2	2	3	2	2	1	1	2	2	1	2	1	1
792	1B	IWB5926	79.436	*	2	1	2	1	1	1	2	1	1	1	1	2	1	2	2	1	1	2	2	2	2	1	1	2	1	2	2	2	2	1	1	2	2	2	3	2	2	1	1	2	2	3	2	1	1
793	1B	IWB36104	79.436	*	2	1	2	1	1	1	2	1	1	1	1	2	1	2	2	1	1	2	2	2	2	1	1	2	1	2	2	2	2	1	1	2	2	2	3	2	2	1	1	2	2	3	2	1	1
794	1B	IWB59153	79.436		2	1	2	1	1	1	2	1	1	1	1	2	1	2	2	1	1	2	2	2	2	1	1	2	1	2	2	2	2	1	1	2	2	2	3	2	2	1	1	2	2	3	2	1	1
795	1B	IWB71367	79.436		2	1	2	1	1	1	2	1	1	1	1	2	1	2	2	1	1	2	2	2	2	1	1	2	1	2	2	2	2	1	1	2	2	2	3	2	2	1	1	2	2	2	2	1	1
796	1B	IWB72552	79.436	*	2	1	2	1	1	1	2	1	1	1	1	2	1	2	2	1	1	2	2	2	2	1	1	2	1	2	2	2	2	1	1	2	2	2	3	2	2	1	1	2	2	2	2	1	1
797	1B	IWB72549	79.436	*	2	1	2	1	1	1	2	1	1	1	1	2	1	2	2	1	1	2	2	2	2	1	1	2	1	2	2	2	2	1	1	3	2	2	3	2	2	1	1	2	2	2	2	1	1
798	1B	IWB22507	79.436		2	1	2	1	1	1	2	1	1	1	1	2	1	2	2	1	1	2	2	2	2	1	1	2	1	2	2	2	2	1	1	2	2	2	3	2	2	1	1	2	2	2	2	1	1
799	1B	IWB50027	84.5558		2	1	2	2	1	1	2	1	2	1	1	2	1	2	2	1	1	2	2	2	2	1	1	2	1	2	2	2	2	1	2	2	2	2	3	2	2	1	1	2	1	2	2	1	1
800	1B	IWB80171	84.5558		2	1	2	2	1	1	2	1	2	1	1	2	1	2	2	1	1	2	2	2	2	1	1	2	1	2	2	2	2	1	2	2	2	2	3	2	2	1	1	2	1	2	2	1	1
801	1B	IWB53437	84.7862		2	1	2	2	1	1	2	1	2	1	1	2	1	2	2	1	1	2	2	2	2	1	1	2	1	2	2	2	2	1	2	2	2	2	3	2	2	1	1	2	1	2	2	1	1
802	1B	IWB39199	84.7862		2	1	2	2	1	1	2	1	2	1	1	2	1	2	2	1	1	2	2	2	2	1	1	2	1	2	2	2	2	1	2	2	2	2	3	2	2	1	1	2	1	2	2	1	1
803	1B	IWB51921	85.0166		2	1	2	2	1	1	2	1	2	1	1	2	1	2	2	1	1	2	2	2	2	1	1	2	1	2	2	2	2	1	2	2	2	2	3	2	2	1	1	2	1	2	2	1	1
804	1B	IWB35875	94.3628		2	2	2	1	1	1	2	2	2	1	1	2	1	1	2	1	1	1	1	2	2	1	1	2	1	2	1	2	1	1	2	2	2	2	3	2	2	1	1	1	1	2	2	1	1
805	1B	IWB5761	94.3628		2	2	2	1	1	1	2	2	2	1	1	2	1	1	2	1	1	1	1	2	2	1	1	2	1	2	1	2	1	1	2	2	2	2	3	2	2	1	1	1	1	2	2	1	1
806	1B	IWB5965	95.2975		2	2	2	1	1	1	2	2	2	1	1	2	1	1	2	1	1	1	1	2	2	1	1	2	1	2	1	2	1	1	2	2	2	2	3	2	2	1	1	1	1	2	2	2	1
807	1B	IWB56565	95.2975		2	2	2	1	3	1	2	2	2	1	1	2	1	1	2	1	1	1	1	2	2	1	1	2	1	2	1	2	1	1	2	2	2	2	3	2	3	1	1	1	1	2	2	2	1
808	1B	IWB21907	95.2975		2	2	2	1	1	1	2	2	2	1	1	2	1	1	2	1	1	1	1	2	2	1	1	2	1	2	1	2	1	1	2	2	2	2	1	2	2	1	1	1	1	2	2	2	1
809	1B	IWB40620	95.2975		2	2	2	1	1	1	2	2	2	1	1	2	1	1	2	1	1	1	1	2	2	1	1	2	1	2	1	2	1	1	2	3	2	2	3	2	2	1	1	1	1	2	2	2	1
810	1B	IWB65251	95.2975		2	2	2	1	1	1	2	2	2	1	1	2	1	1	2	1	1	1	1	2	2	1	1	2	1	2	1	2	1	1	2	3	2	2	3	2	2	1	1	1	1	2	2	2	1
811	1B	IWB69463	95.2975		2	2	2	1	1	1	2	2	2	1	1	2	1	1	2	1	1	1	1	2	2	1	1	2	1	2	1	2	1	1	2	2	2	2	3	2	2	1	1	1	1	2	2	2	1
812	1B	IWB10381	95.2975		2	2	2	1	1	1	2	2	2	1	1	2	1	1	2	1	1	1	1	2	2	1	1	2	1	2	1	2	1	1	2	3	2	2	3	2	2	1	1	1	1	2	2	2	1
813	1B	IWB77753	95.2975		2	2	2	1	1	1	2	2	2	1	1	2	1	1	2	1	1	1	1	2	2	1	1	2	1	2	1	2	1	1	2	2	2	2	3	2	2	1	1	1	1	2	2	2	1
814	1B	IWB39058	95.2975		2	2	2	1	1	1	2	2	2	1	1	2	1	1	2	1	1	1	1	2	2	1	1	2	1	2	1	2	1	1	2	2	2	2	3	2	2	1	1	1	1	2	2	2	1
815	1B	IWB36152	95.2975		2	2	2	1	1	1	2	2	2	1	1	2	1	1	2	1	1	1	1	2	2	1	1	2	1	2	1	2	1	1	2	2	2	2	3	2	2	1	1	1	1	2	2	2	1
816	1B	IWB9781	95.7626		2	2	2	1	1	1	2	2	2	1	1	2	1	1	2	1	1	1	1	2	2	1	1	2	1	2	1	2	1	1	2	2	2	2	3	2	2	1	1	1	1	2	2	2	1
817	1B	IWB22505	95.7626		2	2	2	1	1	1	2	2	2	1	1	2	1	1	2	1	1	1	1	2	2	1	1	2	1	2	1	2	1	1	2	2	2	2	3	2	2	1	1	1	1	2	2	2	1
818	1B	IWB78602	96.931		1	2	2	1	1	1	2	2	2	1	1	2	1	1	2	1	1	1	1	2	2	1	1	2	1	2	1	2	1	1	2	2	2	2	3	2	2	1	1	1	1	1	2	2	1
819	1B	IWB7579	96.931	*	1	2	2	1	1	1	2	2	2	1	1	2	1	1	2	1	1	1	1	2	2	1	1	3	1	2	1	2	1	1	2	2	2	2	3	2	2	1	1	1	1	1	2	2	1
820	1B	IWB78603	96.931		1	2	2	1	1	1	2	2	2	1	1	2	1	1	2	1	1	1	1	2	2	1	1	2	1	2	1	2	1	1	2	2	2	2	3	2	2	1	1	1	1	1	2	2	1
821	1B	IWB36342	96.931		1	2	2	1	1	1	2	2	2	1	1	2	1	1	2	1	1	1	1	2	2	1	1	2	1	2	1	2	1	1	2	2	2	2	3	2	2	1	1	1	1	1	2	2	1
822	1B	IWB79584	96.931		1	2	2	1	1	1	2	2	2	1	1	2	1	1	2	1	1	1	1	2	2	1	1	2	1	2	1	2	1	1	2	2	2	2	3	2	2	1	1	1	1	1	2	2	1
823	1B	IWB3067	96.931		1	2	2	1	1	1	2	2	2	1	1	2	1	1	2	1	1	1	1	2	2	1	1	2	1	2	1	2	1	1	2	2	2	2	3	2	2	1	1	1	1	1	2	2	1
824	1B	IWB49552	96.931		1	2	2	1	1	1	2	2	2	1	1	2	1	1	2	1	1	1	1	2	2	1	1	2	1	2	1	2	1	1	2	2	2	2	3	2	2	1	1	1	1	1	2	2	1
825	1B	IWB77880	96.931		1	2	2	1	1	1	2	2	2	1	1	2	1	1	2	1	1	1	1	2	2	1	1	2	1	2	1	2	1	1	2	2	2	2	1	2	2	1	1	1	1	1	2	2	1
826	1B	IWB73608	97.1593		1	2	2	1	1	1	2	2	2	1	1	2	1	1	2	1	1	1	1	2	2	1	1	2	1	2	1	2	1	1	2	2	2	2	1	2	2	1	1	1	1	1	2	2	1
827	1B	IWB52875	97.1593		1	2	2	1	1	1	2	2	2	1	1	2	1	1	2	1	1	1	1	2	2	1	1	2	1	2	1	2	1	1	2	2	2	2	3	2	2	1	1	1	1	1	2	2	1
828	1B	IWB25615	99.3137	*	1	2	2	1	1	1	2	2	2	1	1	2	1	1	1	1	1	1	1	2	2	1	1	1	1	2	1	2	1	1	2	2	2	2	3	2	2	1	1	1	1	1	2	2	1
829	1B	IWB75739	99.3137	*	1	2	2	1	1	1	2	2	2	1	1	2	1	1	1	1	1	1	1	2	2	1	1	1	1	2	1	2	1	1	2	2	2	2	3	2	2	1	1	1	1	1	2	2	1
830	1B	IWB70123	99.5495	*	1	2	2	1	1	1	2	2	2	1	1	2	1	1	1	1	1	1	1	2	2	1	2	1	1	2	1	2	1	1	2	2	2	2	1	2	2	1	1	1	1	1	2	2	1
831	1B	IWB13742	99.5495	*	1	2	2	1	1	1	2	2	2	1	1	2	1	1	1	1	1	1	1	2	2	1	2	1	1	2	1	2	1	1	2	3	2	2	3	2	2	1	1	1	1	1	2	2	1
832	1B	IWB9208	99.7832		1	2	2	1	1	1	2	2	2	1	1	2	1	1	1	1	1	1	1	2	2	1	2	1	1	2	1	2	1	1	2	2	2	2	3	2	2	1	1	1	1	1	2	2	1
833	1B	IWB58887	99.7832		1	2	2	1	1	1	2	2	2	1	1	2	1	1	1	1	1	1	1	2	2	1	2	1	1	2	1	2	1	1	2	2	2	2	3	2	2	1	1	1	1	1	2	2	1
834	1B	IWB63852	99.7832		1	2	2	1	1	1	2	2	2	1	1	2	1	1	1	1	1	1	1	2	2	1	2	1	1	2	1	2	1	1	2	2	2	2	3	2	2	1	1	1	1	1	2	2	1
835	1B	IWB63853	99.7832		1	2	2	1	1	1	2	2	2	1	1	2	1	1	1	1	1	1	1	2	2	1	2	1	1	2	1	2	1	1	2	2	2	2	3	2	2	1	1	1	1	1	2	2	1
836	1B	IWB41127	99.7832		1	2	2	1	1	1	2	2	2	1	1	2	1	1	1	1	1	1	1	2	2	1	2	1	1	2	1	2	1	1	2	2	2	2	3	2	2	1	1	1	1	1	2	2	1
837	1B	IWB63855	99.7832		1	2	2	1	1	1	2	2	2	1	1	2	1	1	1	1	1	1	1	2	2	1	2	1	1	2	1	2	1	1	2	2	2	2	3	2	2	1	1	1	1	1	2	2	1
838	1B	IWB26591	99.7832		1	2	2	1	1	1	2	2	2	1	1	2	1	1	1	1	1	1	1	2	2	1	2	1	1	2	1	2	1	1	2	2	2	2	3	2	2	1	1	1	1	1	2	2	1
839	1B	IWB7410	99.7832		1	2	2	1	1	1	2	2	2	1	1	2	1	1	1	1	1	1	1	2	2	1	2	1	1	2	1	2	1	1	2	2	2	2	3	2	2	1	1	1	1	1	2	2	1
840	1B	IWB59602	103.087	**	1	2	2	1	1	1	2	2	2	1	1	2	1	1	1	1	1	1	1	2	2	1	2	1	1	1	1	2	1	1	2	1	2	2	2	2	2	1	1	1	1	1	1	2	1
841	1B	IWB42096	103.809	**	1	2	2	1	1	1	2	2	2	1	1	2	1	1	1	1	1	2	1	2	2	1	2	1	1	1	1	2	1	1	2	1	2	2	2	2	1	1	1	1	1	1	1	2	1
842	1B	IWB42095	103.809	**	1	2	2	1	1	1	2	2	2	1	1	2	1	1	1	1	1	2	1	2	2	1	2	1	1	1	1	2	1	1	2	1	2	2	2	2	1	1	1	1	1	1	1	2	1
843	1B	IWB66482	103.809	**	1	2	2	1	1	1	2	2	2	1	1	2	1	1	1	1	1	2	1	2	2	1	2	1	1	1	1	2	1	1	2	1	2	2	2	2	1	1	1	1	1	1	1	2	1
844	1B	IWB3634	103.809	**	1	2	2	1	1	1	2	2	2	1	1	2	1	1	1	1	1	2	1	2	2	1	2	1	1	1	1	2	1	1	2	1	2	2	2	2	1	1	1	1	1	1	1	2	1
845	1B	IWB36283	103.809	**	1	2	2	1	1	1	2	2	2	1	1	2	1	1	1	1	1	2	1	2	2	1	2	1	1	1	1	2	1	1	2	1	2	2	2	2	1	1	1	1	1	1	1	2	1
846	1B	IWB60525	103.809	**	1	2	2	1	1	1	2	2	2	1	1	2	1	1	1	1	1	2	1	2	2	1	2	1	1	1	1	2	1	1	2	1	2	2	2	2	1	1	1	1	1	1	1	2	1
847	1B	IWB77022	104.04	**	1	2	2	1	1	1	1	2	2	1	1	2	1	1	1	1	1	2	1	2	2	1	2	1	1	1	1	2	1	1	2	1	2	2	2	2	1	1	1	1	1	1	1	2	1
848	1B	IWB9937	104.04	**	1	2	2	1	1	1	1	2	2	1	1	2	1	1	1	1	1	2	1	2	2	1	2	1	1	1	1	2	1	1	2	1	2	2	2	2	1	1	1	1	1	1	1	2	1
849	1B	IWB8293	104.04	**	1	2	2	1	1	1	1	2	2	1	1	2	1	1	1	1	1	2	1	2	2	1	2	1	1	1	1	2	1	1	2	1	2	2	2	2	1	1	1	1	1	1	1	2	1
850	1B	IWB76947	104.04	**	1	2	2	1	1	1	1	2	2	1	1	2	1	1	1	1	1	2	1	2	2	1	2	1	1	1	1	2	1	1	2	1	2	2	2	2	1	1	1	1	1	1	1	2	1
851	1B	IWB59930	104.04	**	1	2	2	1	1	1	1	2	2	1	1	2	1	1	1	1	1	2	1	2	2	1	2	1	1	1	1	2	1	1	2	1	2	2	2	2	1	1	1	1	1	1	1	2	1
852	1B	IWB12356	104.04	**	1	2	2	1	1	1	1	2	2	1	1	2	1	1	1	1	1	2	1	2	2	1	2	1	1	1	1	2	1	1	2	1	2	2	2	2	1	1	1	1	1	1	1	2	1
853	1B	IWB38554	104.04	**	1	2	2	1	1	1	1	2	2	1	1	2	1	1	1	1	1	2	1	2	2	1	2	1	1	1	1	2	1	1	2	1	2	2	2	2	1	1	1	1	1	1	1	2	1
854	1B	IWB11914	104.04	**	1	2	2	1	1	1	1	2	2	1	1	2	1	1	1	1	1	2	1	2	2	1	2	1	1	1	1	2	1	1	2	1	2	2	2	2	1	1	1	1	1	1	1	2	1
855	1B	IWB7290	104.04	**	1	2	2	1	1	1	1	2	2	1	1	2	1	1	1	1	1	2	1	2	2	1	2	1	1	1	1	2	1	1	2	1	2	2	2	2	1	1	1	1	1	1	1	2	1
856	1B	IWB42194	104.04	**	1	2	2	1	1	1	1	2	2	1	1	2	1	1	1	1	1	2	1	2	2	1	2	1	1	1	1	2	1	1	2	1	2	2	2	2	1	1	1	1	1	1	1	2	1
857	1B	IWB80489	104.04	**	1	2	2	1	1	1	1	2	2	1	1	2	1	1	1	1	1	2	1	2	2	1	2	1	1	1	1	2	1	1	2	1	2	2	2	2	1	1	1	1	1	1	1	2	1
858	1B	IWB80600	104.04	**	1	2	2	1	1	1	1	2	2	1	1	2	1	1	1	1	1	2	1	2	2	1	2	1	1	1	1	2	1	1	2	3	2	2	2	2	1	1	1	1	1	1	1	2	1
859	1B	IWB24662	104.04	**	1	2	2	1	1	1	1	2	2	1	1	2	1	1	1	1	1	2	1	2	2	1	2	1	1	1	1	2	1	1	2	3	2	2	2	2	1	1	1	1	1	1	1	2	1
860	1B	IWB40585	104.04	**	1	2	2	1	1	1	1	2	2	1	1	2	1	1	1	1	1	2	1	2	2	1	2	3	1	1	1	2	1	1	2	3	2	2	2	2	1	1	1	1	1	1	1	2	1
861	1B	IWB9155	104.04	**	1	2	2	1	1	1	1	2	2	1	1	2	1	1	1	1	1	2	1	2	2	1	2	1	1	1	1	2	1	1	2	3	2	2	2	2	1	1	1	1	1	1	1	2	1
862	1B	IWB35479	104.04	**	1	2	2	1	1	1	1	2	2	1	1	2	1	1	1	1	1	2	1	2	2	1	2	1	1	1	1	2	1	1	2	1	2	2	2	2	1	1	1	1	1	1	1	2	1
863	1B	IWB40040	104.04	**	1	2	2	1	1	1	1	2	2	1	1	2	1	1	1	1	1	2	1	2	2	1	2	1	1	1	1	2	1	1	2	1	2	2	2	2	1	1	1	1	1	1	1	2	1
864	1B	IWB64092	104.269	**	1	2	2	1	1	1	1	2	2	1	1	2	1	1	1	1	1	2	1	2	2	1	2	1	1	1	1	2	1	1	2	1	2	2	2	2	1	1	1	1	1	1	1	2	1
865	1B	IWB10243	104.269	**	1	2	2	1	1	1	1	2	2	1	1	2	1	1	1	1	1	2	1	2	2	1	2	1	1	1	1	2	1	1	2	1	2	2	2	2	1	1	1	1	1	1	1	2	1
866	1B	IWB78921	104.269	**	1	2	2	1	1	1	1	2	2	1	1	2	1	1	1	1	1	2	1	2	2	1	2	1	1	1	1	2	1	1	2	1	2	2	2	2	1	1	1	1	1	1	1	2	1
867	1B	IWB64091	104.269	**	1	2	2	1	1	1	1	2	2	1	1	2	1	1	1	1	1	2	1	2	2	1	2	1	1	1	1	2	1	1	2	1	2	2	2	2	1	1	1	1	1	1	1	2	1
868	1B	IWB58004	104.269	**	1	2	2	1	1	1	1	2	2	1	1	2	1	1	1	1	1	2	1	2	2	1	2	1	1	1	1	2	1	1	2	1	2	2	2	2	1	1	1	1	1	1	1	2	1
869	1B	IWB64093	104.269	**	1	2	2	1	1	1	1	3	2	1	1	2	1	1	1	1	1	2	1	2	2	1	2	3	1	1	1	2	1	1	2	1	2	2	2	2	1	1	1	1	1	1	1	2	1
870	1B	IWB64094	104.269	**	1	2	2	1	1	1	1	2	2	1	1	2	1	1	1	1	1	2	1	2	2	1	2	1	1	1	1	2	1	1	2	3	2	2	2	2	1	1	1	1	1	1	1	2	1
871	1B	IWB81458	104.269	**	1	2	2	1	1	1	1	2	2	1	1	2	1	1	1	1	1	2	1	2	2	1	2	1	1	1	1	2	1	1	2	3	2	2	2	2	1	1	1	1	1	1	1	2	1
872	1B	IWB2667	104.269	**	1	2	2	1	1	1	1	2	2	1	1	2	1	1	1	1	1	2	1	2	2	1	2	1	1	1	1	2	1	1	2	1	2	2	2	2	1	1	1	1	1	1	1	2	1
873	1B	IWB27784	104.964	**	1	2	2	1	1	1	1	2	2	1	1	2	1	1	1	1	1	2	1	2	2	1	1	1	1	1	1	2	1	1	2	1	2	2	2	2	1	1	1	1	1	1	1	2	1
874	1B	IWB31201	104.964	**	1	2	2	1	1	1	1	2	2	1	1	2	1	1	1	1	1	2	1	2	2	1	1	1	1	1	1	2	1	1	2	1	2	2	2	2	1	1	1	1	1	1	1	2	1
875	1B	IWB45740	104.964	**	1	2	2	1	1	1	1	2	2	1	1	2	1	1	1	1	1	2	1	2	2	1	1	1	1	1	1	2	1	1	2	1	2	2	2	2	1	1	1	1	1	1	1	2	1
876	1B	IWB27783	104.964	**	1	2	2	1	1	1	1	2	2	1	1	2	1	1	1	1	1	2	1	2	2	1	1	1	1	1	1	2	1	1	2	1	2	2	2	2	1	1	1	1	1	1	1	2	1
877	1B	IWB4407	104.964	**	1	2	2	1	1	1	1	2	2	1	1	2	1	1	1	1	1	2	1	2	2	1	1	1	1	1	1	2	1	1	2	1	2	2	2	2	1	1	1	1	1	1	1	2	1
878	1B	IWB12497	104.964	**	1	2	2	1	1	1	1	2	2	1	1	2	1	1	1	1	1	2	1	2	2	1	1	1	1	1	1	2	1	1	2	1	2	2	2	2	1	1	1	1	1	1	1	2	1
879	1B	IWB65180	104.964	**	1	2	2	1	1	1	1	2	2	1	1	2	1	1	1	1	1	2	1	2	2	1	1	1	1	1	1	2	1	1	2	1	2	2	2	2	1	1	1	1	1	1	1	2	1
880	1B	IWB26167	104.964	**	1	2	2	1	1	1	1	2	2	1	1	2	1	1	1	1	1	2	1	2	2	1	1	1	1	1	1	2	1	1	2	1	2	2	2	2	1	1	1	1	1	1	1	2	1
881	1B	IWB3260	104.964	**	1	2	2	1	1	1	1	2	2	1	1	2	1	1	1	1	1	2	1	2	2	1	1	1	1	1	1	2	1	1	2	1	2	2	2	2	1	1	1	1	1	1	1	2	1
882	1B	IWB31454	104.964	**	1	2	2	1	1	1	1	2	2	1	1	2	1	1	1	1	1	2	1	2	2	1	1	1	1	1	1	2	1	1	2	1	2	2	2	2	1	1	1	1	1	1	1	2	1
883	1B	IWB10422	104.964	**	1	2	2	1	1	1	1	2	2	1	1	2	1	1	1	1	1	2	1	2	2	1	1	1	1	1	1	2	1	1	2	1	2	2	2	2	1	1	1	1	1	1	1	2	1
884	1B	IWB26166	104.964	**	1	2	2	1	1	1	1	2	2	1	1	2	1	1	1	1	1	2	1	2	2	1	1	1	1	1	1	2	1	1	2	1	2	2	2	2	1	1	1	1	1	1	1	2	1
885	1B	IWB58355	104.964	**	1	2	2	1	1	1	1	2	2	1	1	2	1	1	1	1	1	2	1	2	2	1	1	1	1	1	1	2	1	1	2	3	2	2	2	2	1	1	1	1	1	1	1	2	1
886	1B	IWB10050	104.964	**	1	2	2	1	1	1	1	2	2	1	1	2	1	1	1	1	1	2	1	2	2	1	1	1	1	1	1	2	1	1	2	1	2	2	2	2	1	1	1	1	1	1	1	2	1
887	1B	IWB58356	104.964	**	1	2	2	1	1	1	1	2	2	1	1	2	1	1	1	1	1	2	1	2	2	1	1	1	1	1	1	2	1	1	2	3	2	2	2	2	1	1	1	1	1	1	1	2	1
888	1B	IWB26168	104.964	**	1	2	2	1	1	1	1	2	2	1	1	2	1	1	1	1	1	2	1	2	2	1	1	1	1	1	1	2	1	1	2	1	2	2	2	2	1	1	1	1	1	1	1	2	1
889	1B	IWB80190	108.418	***	1	2	2	1	1	1	1	2	2	1	1	2	1	1	1	1	1	2	1	2	2	1	1	1	1	1	1	1	1	1	2	1	2	1	2	1	1	1	1	1	1	1	1	2	1
890	1B	IWB21947	108.418	***	1	2	2	1	1	1	1	2	2	1	1	2	1	1	1	1	1	2	1	2	2	1	1	1	1	1	1	1	1	1	2	1	2	1	2	1	1	1	1	1	1	1	1	2	1
891	1B	IWB35712	108.418	**	1	2	2	1	1	1	1	2	2	1	1	2	3	1	1	1	1	2	1	2	2	1	1	1	1	1	1	1	1	1	2	1	2	1	2	1	1	1	1	1	1	1	1	2	1
892	1B	IWB4676	108.418	***	1	2	2	1	1	1	1	2	2	1	1	2	1	1	1	1	1	2	1	2	2	1	1	1	1	1	1	1	1	1	2	1	2	1	2	1	1	1	1	1	1	1	1	2	1
893	1B	IWB35329	108.418	***	1	2	2	1	1	1	1	3	2	1	1	2	1	1	1	1	1	2	1	2	2	1	1	1	1	1	1	1	1	1	2	1	2	1	2	1	1	1	1	1	1	1	1	2	1
894	1B	IWB60038	108.418	**	1	2	2	1	1	1	1	2	2	1	1	2	1	1	1	1	1	2	1	2	2	1	1	1	1	1	1	1	1	1	2	3	2	1	2	1	1	1	1	1	1	1	1	2	1
895	1B	IWB68774	109.361	***	1	2	2	1	1	1	1	2	2	1	1	2	1	1	1	1	1	2	1	2	2	1	1	1	1	1	1	1	1	1	2	1	2	1	2	1	1	1	1	1	1	1	1	2	1
896	1B	IWB72831	109.361	***	1	2	2	1	1	1	1	2	2	1	1	2	1	1	1	1	1	2	1	2	2	1	1	1	1	1	1	1	1	1	2	1	2	1	2	1	1	1	1	1	1	1	1	2	1
897	1B	IWB69103	109.361	***	1	2	2	1	1	1	1	2	2	1	1	2	1	1	1	1	1	2	1	2	2	1	1	1	1	1	1	1	1	1	2	1	2	1	2	1	1	1	1	1	1	1	1	2	1
898	1B	IWB78350	109.361	***	1	2	2	1	1	1	1	2	2	1	1	2	1	1	1	1	1	2	1	2	2	1	1	1	1	1	1	1	1	1	2	3	2	1	2	1	1	1	1	1	1	1	1	2	1
899	1B	IWB71993	109.361	****	1	2	2	1	1	1	1	2	2	1	1	2	1	1	1	1	1	2	1	2	2	1	1	1	1	1	1	1	1	1	2	3	2	1	2	1	1	1	1	1	1	1	1	2	1
900	1B	IWB78352	109.361	***	1	2	2	1	1	1	1	2	2	1	1	2	1	1	1	1	1	2	1	2	2	1	1	1	1	1	1	1	1	1	2	1	2	1	2	1	1	1	1	1	1	1	1	2	1
901	1B	IWB73062	109.361	***	1	2	2	1	1	1	1	2	2	1	1	2	1	1	1	1	1	2	1	2	2	1	1	1	1	1	1	1	1	1	2	1	2	1	2	1	1	1	1	1	1	1	1	2	1
902	1B	IWB71992	109.361	***	1	2	2	1	1	1	1	2	2	1	1	2	1	1	1	1	1	2	1	2	2	1	1	1	1	1	1	1	1	1	2	1	2	1	2	1	1	1	1	1	1	1	1	2	1
903	1B	IWB72324	109.361	***	1	2	2	1	1	1	1	2	2	1	1	2	1	1	1	1	1	2	1	2	2	1	1	1	1	1	1	1	1	1	2	1	2	1	2	1	1	1	1	1	1	1	1	2	1
904	1B	IWB78351	109.361	***	1	2	2	1	1	1	1	2	2	1	1	2	1	1	1	1	1	2	1	2	2	1	1	1	1	1	1	1	1	1	2	1	2	1	2	1	1	1	1	1	1	1	1	2	1
905	1B	IWB18556	109.589	***	1	2	2	1	1	1	1	2	2	1	1	2	1	1	1	1	1	2	1	2	2	1	1	1	1	1	2	1	1	1	2	1	2	1	2	1	1	1	1	1	1	1	1	2	1
906	1B	IWB13134	109.589	***	1	2	2	1	1	1	1	3	2	1	1	2	1	1	1	1	1	2	1	2	2	1	1	1	1	1	2	1	1	1	2	3	2	1	2	1	1	1	1	1	1	1	1	2	1
907	1B	IWB73033	109.589	***	1	2	2	1	1	1	1	2	2	1	1	2	1	1	1	1	1	2	1	2	2	1	1	1	1	1	2	1	1	1	2	1	2	1	2	1	1	1	1	1	1	1	1	2	1
908	1B	IWB73032	109.589	***	1	2	2	1	1	1	1	2	2	1	1	2	1	1	1	1	1	2	1	2	2	1	1	1	1	1	2	1	1	1	2	1	2	1	2	1	1	1	1	1	1	1	1	2	1
909	1B	IWB7976	109.589	***	1	2	2	1	1	1	1	2	2	1	1	2	1	1	1	1	1	2	1	2	2	1	1	1	1	1	2	1	1	1	2	1	2	1	2	1	1	1	1	1	1	1	1	2	1
910	1B	IWB10621	109.819	***	1	2	2	1	1	1	1	2	2	1	1	2	1	1	1	1	1	2	1	2	2	1	1	1	1	1	2	1	1	1	2	1	2	1	2	1	1	1	1	1	1	1	1	2	1
911	1B	IWB6989	110.049	***	1	2	2	1	1	1	1	2	2	1	1	2	1	1	1	1	1	2	1	2	2	1	1	1	1	1	2	1	1	1	2	1	2	1	1	1	1	1	1	1	1	1	1	2	1
912	1B	IWB6808	111.708	****	1	2	2	1	1	1	1	2	2	1	1	2	1	1	1	1	1	2	1	2	2	1	1	1	1	1	2	1	1	1	2	1	1	1	1	1	1	1	1	1	1	1	1	2	1
913	1B	IWB35958	111.708	****	1	2	2	1	1	1	1	2	2	1	1	2	1	1	1	1	1	2	1	2	2	1	1	1	1	1	2	1	1	1	2	3	1	1	1	1	1	1	1	1	1	1	1	2	1
914	1B	IWB3330	111.708	***	1	2	2	1	1	1	1	2	2	1	1	2	1	1	1	1	1	2	1	2	2	1	1	1	1	1	2	1	1	1	2	3	1	1	1	1	1	1	1	1	1	1	1	2	1
915	1B	IWB5074	111.708	***	1	2	2	1	1	1	1	2	2	1	1	2	1	1	1	1	1	2	1	2	2	1	1	1	1	1	2	1	1	1	2	3	1	1	1	1	1	1	1	1	1	1	1	2	1
916	1B	IWB11958	111.708	****	1	2	2	1	1	1	1	2	2	1	1	2	1	1	1	1	1	2	1	2	2	1	1	1	1	1	2	1	1	1	2	1	1	1	1	1	1	1	1	1	1	1	1	2	1
917	1B	IWB79708	111.708	****	1	2	2	1	1	1	3	2	2	1	1	2	1	1	1	1	1	2	1	2	2	1	1	1	1	1	2	1	1	1	2	1	1	1	1	1	1	1	1	1	1	1	1	2	1
918	1B	IWB62270	111.708	****	1	2	2	1	1	1	1	2	2	1	1	2	1	1	1	1	1	2	1	2	2	1	1	1	1	1	2	1	1	1	2	1	1	1	1	1	1	1	1	1	1	1	1	2	1
919	1B	IWB6811	111.708	****	1	2	2	1	1	1	1	2	2	1	1	2	1	1	1	1	1	2	1	2	2	1	1	1	1	1	2	1	1	1	2	1	1	1	1	1	1	1	1	1	1	1	1	2	1
920	1B	IWB54063	111.708	****	1	2	2	1	1	1	1	2	2	1	1	2	1	1	1	1	1	2	1	2	2	1	1	1	1	1	2	1	1	1	2	1	1	1	1	1	1	1	1	1	1	1	1	2	1
921	1B	IWB35890	111.708	****	1	2	2	1	1	1	1	2	2	1	1	2	1	1	1	1	1	2	1	2	2	1	1	1	1	1	2	1	1	1	2	1	1	1	1	1	1	1	1	1	1	1	1	2	1
922	1B	IWB29141	113.111	****	1	2	2	1	1	1	1	2	2	2	1	2	1	1	1	1	1	2	1	2	2	1	1	1	1	1	2	1	1	1	2	1	1	1	1	1	1	1	1	1	1	1	1	2	1
923	1B	IWB57827	113.111	****	1	2	2	1	1	1	1	2	2	2	1	2	1	1	1	1	1	2	1	2	2	1	1	1	1	1	2	1	1	1	2	3	1	1	1	1	1	1	1	1	1	1	1	2	1
924	1B	IWB51279	113.111	****	1	2	2	1	1	1	1	2	2	2	1	2	1	1	1	1	1	2	1	2	2	1	1	1	1	1	2	1	1	1	2	1	1	1	1	1	1	1	1	1	1	1	1	2	1
925	1B	IWB74776	113.111	****	1	2	2	1	1	1	1	2	2	2	1	2	1	1	1	1	1	2	1	2	2	1	1	1	1	1	2	1	1	1	2	1	1	1	1	1	1	1	1	1	1	1	1	2	1
926	1B	IWB27691	113.111	****	1	2	2	1	1	1	1	2	2	2	1	2	1	1	1	1	1	2	1	2	2	1	1	1	1	1	2	1	1	1	2	1	1	1	1	1	1	1	1	1	1	1	1	2	1
927	1B	IWB56525	113.111	****	1	2	2	1	1	1	1	2	2	2	1	2	1	1	1	1	1	2	1	2	2	1	1	1	1	1	2	1	1	1	2	1	1	1	1	1	1	1	1	1	1	1	1	2	1
928	1B	IWB37326	113.339	****	1	2	2	1	1	1	1	2	2	2	1	2	1	1	1	1	1	2	1	2	2	1	1	1	1	1	2	1	1	1	2	1	1	1	1	1	1	1	1	1	1	1	1	2	1
929	1B	IWB10069	113.339	****	1	2	2	1	1	1	1	2	2	2	1	2	1	1	1	1	1	2	1	2	2	1	1	1	1	1	2	1	1	1	2	1	1	1	1	1	1	1	1	1	1	1	1	2	1
930	1B	IWB76761	114.037	****	1	2	2	1	1	1	1	2	2	2	1	2	1	1	1	1	1	2	1	2	2	1	1	1	1	1	2	1	1	1	2	1	1	1	1	1	1	1	1	1	1	1	1	2	1
931	1B	IWB55332	115.951	****	2	2	2	1	1	1	1	2	2	2	1	2	1	1	1	1	1	2	1	2	2	1	1	1	1	1	1	1	1	1	2	1	1	1	1	1	1	1	1	1	1	1	1	2	1
932	1B	IWB5855	115.951	****	2	2	2	1	1	1	1	2	2	2	1	2	1	1	1	1	1	2	1	2	2	1	1	1	1	1	1	1	1	1	2	3	1	1	1	1	1	1	1	1	1	1	1	2	1
933	1B	IWB66920	115.951	****	2	2	2	1	1	1	1	2	2	2	1	2	1	1	1	1	1	2	1	2	2	1	1	1	1	1	1	1	1	1	2	3	1	1	1	1	1	1	1	1	1	1	1	2	1
934	1B	IWB66919	115.951	****	2	2	2	1	1	1	1	2	2	2	1	2	1	1	1	1	1	2	1	2	2	1	1	1	1	1	1	1	1	1	2	3	1	1	1	1	1	1	1	1	1	1	1	2	1
935	1B	IWB46187	116.184	****	2	2	2	1	1	1	1	2	2	2	1	2	1	1	1	1	1	2	1	2	2	1	1	1	1	1	1	1	1	1	2	1	1	1	1	1	1	1	1	1	1	1	1	2	1
936	1B	IWB41896	116.415	***	2	2	2	1	1	1	1	2	2	2	1	2	1	1	1	1	1	2	1	2	2	1	1	1	1	1	1	1	1	1	2	1	1	1	1	1	1	1	1	1	1	1	1	2	1
937	1B	IWB41897	116.415	***	2	2	2	1	1	1	1	2	2	2	1	2	1	1	1	1	1	2	1	2	2	1	1	1	1	1	1	1	1	1	2	1	1	1	1	1	1	1	1	1	1	1	1	2	1
938	1B	IWB60344	116.415	***	2	2	2	1	1	1	1	2	2	2	1	2	1	1	1	1	1	2	1	2	2	1	1	1	1	1	1	1	1	1	2	1	1	1	1	1	1	1	1	1	1	1	1	2	1
939	1B	IWB26489	116.415	***	2	2	2	1	1	1	1	2	2	2	1	2	1	1	1	1	1	2	1	2	2	1	1	1	1	1	1	1	1	1	2	1	1	1	1	1	1	1	1	1	1	1	1	2	1
940	1B	IWB23869	116.415	***	2	2	2	1	1	1	1	2	2	2	1	2	1	1	1	1	1	2	1	2	2	1	1	1	1	1	1	1	1	1	2	1	1	1	1	1	1	1	1	1	1	1	1	2	1
941	1B	IWB67794	116.415	***	2	2	2	1	1	1	1	2	2	2	1	2	1	1	1	1	1	2	1	2	2	1	1	1	1	1	1	1	1	1	2	1	1	1	1	1	1	1	1	1	1	1	1	2	1
942	1B	IWB41894	116.415	***	2	2	2	1	1	1	1	2	2	2	1	2	1	1	1	1	1	2	1	2	2	1	1	1	1	1	1	1	1	1	2	1	1	1	1	1	1	1	1	1	1	1	1	2	1
943	1B	IWB46553	116.415	***	2	2	2	1	1	1	1	2	2	2	1	2	1	1	1	1	1	2	1	2	2	1	1	1	1	1	1	1	1	1	2	1	1	1	1	1	1	1	1	1	1	1	1	2	1
944	1B	IWB13488	116.415	***	2	2	2	1	1	1	1	2	2	2	1	2	1	1	1	1	1	2	1	2	2	1	1	1	1	1	1	1	1	1	2	1	1	1	1	1	1	1	1	1	1	1	1	2	1
945	1B	IWB12325	116.415	***	2	2	2	1	1	1	1	2	2	2	1	2	1	1	1	1	1	2	1	2	2	1	1	1	1	1	1	1	1	1	2	1	1	1	1	1	1	1	1	1	1	1	1	2	1
946	1B	IWB31152	117.341	****	1	2	2	1	1	1	1	2	2	2	1	1	1	1	1	1	1	2	1	2	2	1	1	1	1	1	1	1	1	1	2	1	1	1	1	1	1	1	1	1	1	1	1	2	1
947	1B	IWB7144	117.341	****	1	2	2	1	1	1	1	2	2	2	1	1	1	1	1	1	1	2	1	2	2	1	1	1	1	1	1	1	1	1	2	1	1	1	1	1	1	1	1	1	1	1	1	2	1
948	1B	IWB52607	117.341	****	1	2	2	1	1	1	1	2	2	2	1	1	1	1	1	1	1	2	1	2	2	1	1	1	1	1	1	1	1	1	2	1	1	1	1	1	1	1	1	1	1	1	1	2	1
949	1B	IWB11351	117.341	****	1	2	2	1	1	1	1	2	2	2	1	1	1	1	1	1	1	2	1	2	2	1	1	1	1	1	1	1	1	1	2	1	1	1	1	1	1	1	1	1	1	1	1	2	1
950	1B	IWB52606	117.341	****	1	2	2	1	1	1	1	2	2	2	1	1	1	1	1	1	1	2	1	2	2	1	1	1	1	1	1	1	1	1	2	1	1	1	1	1	1	1	1	1	1	1	1	2	1
951	1B	IWB74755	117.341	****	1	2	2	1	1	1	1	2	2	2	1	1	1	1	1	1	1	2	1	2	2	1	1	1	1	1	1	1	1	1	2	1	1	1	1	1	1	1	1	1	1	1	1	2	1
952	1B	IWB74754	117.341	****	1	2	2	1	1	1	1	2	2	2	1	1	1	1	1	1	1	2	1	2	2	1	1	1	1	1	1	1	1	1	2	1	1	1	1	1	1	1	1	1	1	1	1	2	1
953	1B	IWB74753	117.341	****	1	2	2	1	1	1	1	2	2	2	1	1	1	1	1	1	1	2	1	2	2	1	1	1	1	1	1	1	1	1	2	1	1	1	1	1	1	1	1	1	1	1	1	2	1
954	1B	IWB34585	117.572	****	1	2	2	1	1	1	1	2	2	2	1	1	1	1	1	1	1	2	1	2	3	1	1	1	1	1	1	1	1	1	2	1	1	1	1	1	1	1	1	1	1	1	1	2	1
955	1B	IWB13005	117.802	****	1	2	2	1	1	1	1	2	2	2	1	1	1	1	1	1	1	2	1	2	2	1	1	1	1	1	1	1	1	1	2	1	1	1	1	1	1	1	1	1	1	1	1	2	1
956	1B	IWB11858	117.802	****	1	2	2	1	1	1	1	2	2	2	1	1	1	1	1	1	1	2	1	2	2	1	1	1	1	1	1	1	1	1	2	1	1	1	1	1	1	1	1	1	1	1	1	2	1
957	1B	IWB75028	117.802	****	1	2	2	1	1	1	1	2	2	2	1	1	1	1	1	1	1	2	1	2	2	1	1	1	1	1	1	1	1	1	2	1	1	1	1	1	1	1	1	1	1	1	1	2	1
958	1B	IWB13006	117.802	****	1	2	2	1	1	1	1	2	2	2	1	1	1	1	1	1	1	2	1	2	2	1	1	1	1	1	1	1	1	1	2	1	1	1	1	1	1	1	1	1	1	1	1	2	1
959	1B	IWB73492	118.035	****	1	2	2	1	1	1	1	2	2	2	1	1	1	1	1	1	1	2	1	2	2	1	1	1	1	1	1	1	1	1	2	1	1	1	1	1	1	1	1	1	1	1	1	2	1
960	1B	IWB11625	118.035	****	1	2	2	1	1	1	1	2	2	2	1	1	1	1	1	1	1	2	1	2	2	1	1	1	1	1	1	1	1	1	2	1	1	1	1	1	1	1	1	1	1	1	1	2	1
961	1B	IWB77837	119.444	***	1	2	2	1	1	1	1	2	2	2	1	1	1	1	1	1	1	2	1	2	2	2	1	1	1	1	1	1	1	1	2	1	1	1	1	1	1	1	1	1	1	1	2	2	1
962	1B	IWB66195	119.444	***	1	2	2	1	1	1	1	2	2	2	1	1	1	1	1	1	1	2	1	2	2	2	1	1	1	1	1	1	1	1	2	1	1	1	1	1	1	1	1	1	1	1	2	2	1
963	1B	IWB66185	119.444	***	1	2	2	1	1	1	1	2	2	2	1	1	1	1	1	1	1	2	1	2	2	2	1	1	1	1	1	1	1	1	2	1	1	1	1	1	1	1	1	1	1	1	2	2	1
964	1B	IWB66192	119.444	***	1	2	2	1	1	1	1	2	2	2	1	1	1	1	1	1	1	2	1	2	2	2	1	1	1	1	1	1	1	1	2	1	1	1	1	1	1	1	1	1	1	1	2	2	1
965	1B	IWB66189	119.444	***	1	2	2	1	1	1	1	2	2	2	1	1	1	1	1	1	1	2	1	2	2	2	1	1	1	1	1	1	1	1	2	1	1	1	1	1	1	1	1	1	1	1	2	2	1
966	1B	IWB66186	119.444	***	1	2	2	1	1	1	1	2	2	2	1	1	1	1	1	1	1	2	1	2	2	2	1	1	1	1	1	1	1	1	2	1	1	1	1	1	1	1	1	1	1	1	2	2	1
967	1B	IWB34425	119.444	***	1	2	2	1	1	1	1	2	2	2	1	1	1	1	1	1	1	2	1	2	2	2	1	1	1	1	1	1	1	1	2	1	1	1	1	1	1	1	1	1	1	1	2	2	1
968	1B	IWB25499	119.444	***	1	2	2	1	1	1	1	2	2	2	1	1	1	1	1	1	1	2	1	2	2	2	1	1	1	1	1	1	1	1	2	1	1	1	1	1	1	1	1	1	1	1	2	2	1
969	1B	IWB66196	119.444	***	1	2	2	1	1	1	1	2	2	2	1	1	1	1	1	1	1	2	1	2	2	2	1	1	1	1	1	1	1	1	2	1	1	1	1	1	1	1	1	1	1	1	2	2	1
970	1B	IWB29144	119.444	***	1	2	2	1	1	1	1	2	2	2	1	1	1	1	1	1	1	2	1	2	2	2	1	1	1	1	1	1	1	1	2	1	1	1	1	1	1	1	1	1	1	1	2	2	1
971	1B	IWB66198	119.444	***	1	2	2	1	1	1	1	2	2	2	1	1	1	1	1	1	1	2	1	2	2	2	1	1	1	1	1	1	1	1	2	1	1	1	1	1	1	1	1	1	1	1	2	2	1
972	1B	IWB36598	119.444	***	1	2	2	1	1	1	1	2	2	2	1	1	1	1	1	1	1	2	1	2	2	2	1	1	1	1	1	1	1	1	2	1	1	1	1	1	1	1	1	1	1	1	2	2	1
973	1B	IWB43818	119.444	***	1	2	2	1	1	1	1	2	2	2	1	1	1	1	1	1	1	2	1	2	2	2	1	1	1	1	1	1	1	1	2	1	1	1	1	1	1	1	1	1	1	1	2	2	1
974	1B	IWB25498	119.444	***	1	2	2	1	1	1	1	2	2	2	1	1	1	1	1	1	1	2	1	2	2	2	1	1	1	1	1	1	1	1	2	1	1	1	1	1	1	1	1	1	1	1	2	2	1
975	1B	IWB66191	119.444	**	1	2	2	1	1	1	1	2	2	2	1	1	1	1	1	1	1	2	1	2	2	2	1	1	1	1	1	1	1	1	2	3	1	1	1	1	1	1	1	1	1	1	2	2	1
976	1B	IWB31486	119.444	***	1	2	2	1	1	1	1	2	2	2	1	1	1	1	1	1	1	2	1	2	2	2	1	1	1	1	1	1	1	1	2	3	1	1	1	1	1	1	1	1	1	1	2	2	1
977	1B	IWB61880	120.652	**	1	2	2	1	1	1	1	2	2	2	1	1	1	1	1	1	1	2	1	2	2	2	1	1	1	1	1	1	1	1	2	1	1	1	1	1	1	1	1	1	1	1	2	2	1
978	1B	IWB77523	120.88	**	1	2	2	1	1	1	1	2	2	2	1	1	1	1	1	1	1	2	1	2	2	2	1	1	1	1	1	1	1	1	2	1	1	1	1	1	1	1	1	1	1	1	2	2	1
979	1B	IWB70151	120.88	**	1	2	2	1	1	1	1	2	2	2	1	1	1	1	1	1	1	2	1	2	2	2	1	1	1	1	1	1	1	1	2	1	1	1	1	1	1	1	1	1	1	1	2	2	1
980	1B	IWB77522	120.88	**	1	2	2	1	1	1	1	2	2	2	1	1	1	1	1	1	1	2	1	2	2	2	1	1	1	1	1	1	1	1	2	1	1	1	1	1	1	1	1	1	1	1	2	2	1
981	1B	IWB79375	120.88	**	1	2	2	1	1	1	1	2	2	2	1	1	1	1	1	1	1	2	1	2	2	2	1	1	1	1	1	1	1	1	2	1	1	1	1	1	1	1	1	1	1	1	2	2	1
982	1B	IWB79698	120.88	**	1	2	2	1	1	1	1	2	2	2	1	1	1	1	1	1	1	2	1	2	2	2	1	1	1	1	1	1	1	1	2	1	1	1	1	1	1	1	1	1	1	1	2	2	1
983	1B	IWB79374	120.88	**	1	2	2	1	1	1	1	2	2	2	1	1	1	1	1	1	1	2	1	2	2	2	1	1	1	1	1	1	1	1	2	1	1	1	1	1	1	1	1	1	1	1	2	2	1
984	1B	IWB1304	120.88	**	1	2	2	1	1	1	1	2	2	2	1	1	1	1	1	1	1	2	1	2	2	2	1	1	1	1	1	1	1	1	2	1	1	1	1	1	1	1	1	1	1	1	2	2	1
985	1B	IWB26965	120.88	**	1	2	2	1	1	1	1	2	2	2	1	1	1	1	1	1	1	2	1	2	2	2	1	1	1	1	1	1	1	1	2	3	1	1	1	1	1	1	1	1	1	1	2	2	1
986	1B	IWB37894	120.88	**	1	2	2	1	1	1	1	2	2	2	1	1	1	1	1	1	1	2	1	2	2	2	1	1	1	1	1	1	1	1	2	1	1	1	1	1	1	1	1	1	1	1	2	2	1
987	1B	IWB12979	125.415	**	1	2	2	2	1	1	1	2	2	1	1	1	1	1	1	1	1	2	1	2	2	2	1	1	1	1	1	1	1	2	2	1	1	1	1	1	1	1	1	1	1	1	2	2	1
988	1B	IWB72142	126.354	**	1	2	2	2	1	1	1	2	2	1	1	1	1	1	1	1	1	2	1	2	2	2	1	1	1	1	1	1	1	2	2	1	1	1	1	1	1	1	1	1	1	1	2	2	1
989	1B	IWB1725	126.817	**	1	2	2	2	1	1	1	2	2	1	1	1	1	1	1	1	1	2	1	2	2	2	1	1	1	1	1	1	1	2	2	1	1	1	1	1	1	1	1	1	1	1	2	2	1
990	1B	IWB70079	126.817	**	1	2	2	2	1	1	1	2	2	1	1	1	1	1	1	1	1	2	1	2	2	2	1	1	1	1	1	1	1	2	2	1	1	1	1	1	1	1	1	1	1	1	2	2	1
991	1B	IWB29150	126.817	**	1	2	2	2	1	1	1	2	2	1	1	1	1	1	1	1	1	2	1	2	2	2	1	1	1	1	1	1	1	2	2	3	1	1	1	1	1	1	1	1	1	1	2	2	1
992	1B	IWB66973	126.817	**	1	2	2	2	1	1	1	2	2	1	1	1	1	1	1	1	1	2	1	2	2	2	1	1	1	1	1	1	1	2	2	1	1	1	1	1	1	1	1	1	1	1	2	2	1
993	1B	IWB63739	126.817	**	1	2	2	2	1	1	1	2	2	1	1	1	1	1	1	1	1	2	1	2	2	2	1	1	1	1	1	1	1	2	2	1	1	1	1	1	1	1	1	1	1	1	2	2	1
994	1B	IWB29151	126.817	**	1	2	2	2	1	1	1	2	2	1	1	1	1	1	1	1	1	2	1	2	2	2	1	1	1	1	1	1	1	2	2	1	1	1	1	1	1	1	1	1	1	1	2	2	1
995	1B	IWB12399	126.817	**	1	2	2	2	1	1	1	2	2	1	1	1	1	1	1	1	1	2	1	2	2	2	1	1	1	1	1	1	1	2	2	1	1	1	1	1	1	1	1	1	1	1	2	2	1
996	1B	IWB36563	126.817	**	1	2	2	2	1	1	1	2	2	1	1	1	1	1	1	1	1	2	1	2	2	2	1	1	1	1	1	1	1	2	2	1	1	1	1	1	1	1	1	1	1	1	2	2	1
997	1B	IWB12093	126.817	**	1	2	2	2	1	1	1	2	2	1	1	1	1	1	1	1	1	2	1	2	2	2	1	1	1	1	1	1	1	2	2	1	1	1	1	1	1	1	1	1	1	1	2	2	1
998	1B	IWB81539	127.047	**	1	2	2	2	1	1	1	2	2	1	1	1	1	1	1	1	1	2	1	2	2	2	1	2	1	1	1	1	1	2	2	1	1	1	1	1	1	1	1	1	1	1	2	2	1
999	1B	IWB75829	127.047	**	1	2	2	2	1	1	1	2	2	1	1	1	1	1	1	1	1	2	1	2	2	2	1	2	1	1	1	1	1	2	2	1	1	1	1	1	1	1	1	1	1	1	2	2	1
1000	1B	IWB10454	127.047	**	1	2	2	2	1	1	1	2	2	1	1	1	1	1	1	1	1	2	1	2	2	2	1	2	1	1	1	1	1	2	2	1	1	1	1	1	1	1	1	1	1	1	2	2	1
1001	1B	IWB46686	127.047	**	1	2	2	2	1	1	1	2	2	1	1	1	1	1	1	1	1	2	1	2	2	2	1	2	1	1	1	1	1	2	2	1	1	1	1	1	1	1	1	1	1	1	2	2	1
1002	1B	IWB13876	127.047	**	1	2	2	2	1	1	1	2	2	1	1	1	1	1	1	1	1	2	1	2	2	2	1	2	1	1	1	1	1	2	2	3	1	1	1	1	1	1	1	1	1	1	2	2	1
1003	1B	IWB5810	127.047	**	1	2	2	2	1	1	1	2	2	1	1	1	1	1	1	1	1	2	1	2	2	2	1	2	1	1	1	1	1	2	2	1	1	1	1	1	1	1	1	1	1	1	2	2	1
1004	1B	IWB6805	127.047	**	1	2	2	2	1	1	1	2	2	1	1	1	1	1	1	1	1	2	1	2	2	2	1	2	1	1	1	1	1	2	2	1	1	1	1	1	1	1	1	1	1	1	2	2	1
1005	1B	IWB8005	131.909	***	1	1	2	2	1	2	1	2	1	1	1	1	1	1	1	1	1	2	1	1	2	2	1	2	1	1	1	1	1	2	2	1	1	1	1	1	1	1	1	1	1	1	2	2	1
1006	1B	IWB8004	131.909	***	1	1	2	2	1	2	1	2	1	1	1	1	1	1	1	1	1	2	1	1	2	2	1	2	1	1	1	1	1	2	2	1	1	1	1	1	1	1	1	1	1	1	2	2	1
1007	1B	IWB10224	131.909	***	1	1	2	2	1	2	1	2	1	1	1	1	1	1	1	1	1	2	1	1	2	2	1	2	1	1	1	1	1	2	2	1	1	1	1	1	1	1	1	1	1	1	2	2	1
1008	1B	IWB8840	134.303	***	1	1	2	2	1	2	2	2	1	1	1	1	1	1	1	1	1	2	2	1	2	2	1	2	1	1	1	1	1	2	2	1	1	1	1	1	1	2	1	1	1	1	2	2	1
1009	1B	IWB7686	134.766	***	1	1	2	2	1	2	2	2	1	1	1	1	1	1	1	1	1	2	2	1	2	2	1	2	1	1	1	1	1	2	2	1	1	1	1	1	1	2	1	1	1	1	2	2	1
1010	1B	IWB42786	134.766	***	1	1	2	2	1	2	2	2	1	1	1	1	1	1	1	1	1	2	2	1	2	2	1	2	1	1	1	1	1	2	2	3	1	1	1	1	1	2	1	1	1	1	2	2	1
1011	1B	IWB9182	134.766	****	1	1	2	2	1	2	2	2	1	1	1	1	1	1	1	1	1	2	2	1	2	2	1	2	1	1	1	1	1	2	2	1	1	1	1	1	1	2	1	1	1	1	2	2	1
1012	1B	IWB41964	134.766	****	1	1	2	2	1	2	2	2	1	1	1	1	1	1	1	1	1	2	2	1	2	2	1	2	1	1	1	1	1	3	2	3	1	1	1	1	1	2	1	1	1	1	2	2	1
1013	1B	IWB7459	134.766	****	1	1	2	2	1	2	2	2	1	1	1	1	1	1	1	1	1	2	2	1	2	2	1	2	1	1	1	1	1	1	2	1	1	1	1	1	1	2	1	1	1	1	2	2	1
1014	1B	IWB73299	134.766	****	1	1	2	2	1	2	2	2	1	1	1	1	1	1	1	1	1	2	2	1	2	2	1	2	1	1	1	1	1	1	2	1	1	1	1	1	1	2	1	1	1	1	2	2	1
1015	1B	IWB8409	134.766	****	1	1	2	2	1	2	2	2	1	1	1	1	1	1	1	1	1	2	2	1	2	2	1	2	1	1	1	1	1	1	2	1	1	1	1	1	1	2	1	1	1	1	2	2	1
1016	1B	IWB67874	135.946	*****	1	1	2	2	1	2	2	2	1	1	1	1	1	1	1	1	2	1	2	1	2	2	1	2	1	1	1	1	1	1	2	1	1	1	1	1	1	2	1	1	1	1	2	2	1
1017	1B	IWB12812	135.946	****	1	1	2	2	1	2	2	2	1	1	1	1	1	1	1	1	2	1	2	1	2	2	1	2	1	1	1	1	1	1	2	1	1	1	1	1	1	2	1	1	1	1	2	2	1
1018	1B	IWB57225	135.946	****	1	1	2	2	1	2	2	2	1	1	1	1	1	1	1	1	2	1	2	1	2	2	1	2	1	1	1	1	1	1	2	1	1	1	1	1	1	2	1	1	1	1	2	2	1
1019	1B	IWB67871	135.946	*****	1	1	2	2	1	2	2	2	1	1	1	1	1	1	1	1	2	1	2	1	2	2	1	2	1	1	1	1	1	1	2	1	1	1	1	1	1	2	1	1	1	1	2	2	1
1020	1B	IWB67869	135.946	*****	1	1	2	2	1	2	2	2	1	1	1	1	1	1	1	1	2	1	2	1	2	2	1	2	1	1	1	1	1	1	2	1	1	1	1	1	1	2	1	1	1	1	2	2	1
1021	1B	IWB67870	135.946	*****	1	1	2	2	1	2	2	2	1	1	1	1	1	1	1	1	2	1	2	1	2	2	1	2	1	1	1	1	1	1	2	1	1	1	1	1	1	2	1	1	1	1	2	2	1
1022	1B	IWB67872	135.946	****	1	1	2	2	1	2	2	2	1	1	1	1	1	1	1	1	2	1	2	1	2	2	1	2	1	1	1	1	1	1	2	1	1	1	1	1	1	2	1	1	1	1	2	2	1
1023	1B	IWB19407	135.946	****	1	1	2	2	1	2	2	2	1	1	1	1	1	1	1	1	2	1	2	1	2	2	1	3	1	1	1	1	1	1	2	1	1	1	1	1	1	2	1	1	1	1	2	2	1
1024	1B	IWB3715	135.946	****	1	1	2	2	1	2	2	2	1	1	1	1	1	1	1	1	2	1	2	1	2	2	1	2	1	1	1	1	1	1	2	1	1	1	1	1	1	2	1	1	1	1	2	2	1
1025	1B	IWB69408	135.946	****	1	1	2	2	1	2	2	2	1	1	1	1	1	1	1	1	2	1	2	1	2	2	1	2	1	1	1	1	1	1	2	1	1	1	1	1	1	2	1	1	1	1	2	2	1
1026	1B	IWB64651	135.946	****	1	1	2	2	1	2	2	2	1	1	1	1	1	1	1	1	2	1	2	1	2	2	1	3	1	1	1	1	1	1	2	3	1	1	1	1	1	2	1	1	1	1	2	2	1
1027	1B	IWB73967	135.946	****	1	1	2	2	1	2	2	2	1	1	1	1	1	1	1	1	2	1	2	1	2	2	1	2	1	1	1	1	1	1	2	1	1	1	1	1	1	2	1	1	1	1	2	2	1
1028	1B	IWB67873	135.946	****	1	1	2	2	1	2	2	2	1	1	1	1	1	1	1	1	2	1	2	1	2	2	1	2	1	1	1	1	1	1	2	1	1	1	1	1	1	2	1	1	1	1	2	2	1
1029	1B	IWB67876	135.946	****	1	1	2	2	1	2	2	2	1	1	1	1	1	1	1	1	2	1	2	1	2	2	1	2	1	1	1	1	1	1	2	1	1	1	1	1	1	2	1	1	1	1	2	2	1
1030	1B	IWB10582	136.409	*****	1	1	2	2	1	2	2	2	1	1	1	1	1	1	1	1	2	1	2	1	2	2	1	2	1	1	1	1	1	1	2	1	1	1	1	1	1	2	1	1	1	1	2	2	1
1031	1B	IWB65780	136.409	****	1	1	2	2	1	2	2	2	1	1	1	1	1	1	1	1	2	1	2	1	2	2	1	2	1	1	1	1	1	1	2	1	1	1	1	1	1	2	1	1	1	1	2	2	1
1032	1B	IWB31691	136.409	****	1	1	2	2	1	2	2	2	1	1	1	1	1	1	1	1	2	1	2	1	2	2	1	2	1	1	1	1	1	1	2	1	1	1	1	1	1	2	1	1	1	1	2	2	1
1033	1B	IWB3081	136.409	****	1	1	2	2	1	2	2	2	1	1	1	1	1	1	1	1	2	1	2	1	2	2	1	2	1	1	1	1	1	1	2	1	1	1	1	1	1	2	1	1	1	1	2	2	1
1034	1B	IWB31694	136.409	*****	1	1	2	2	1	2	2	2	1	1	1	1	1	1	1	1	2	1	2	1	2	2	1	2	1	1	1	1	1	1	2	1	1	1	1	1	1	2	1	1	1	1	2	2	1
1035	1B	IWB71824	136.409	****	1	1	2	2	1	2	2	2	1	1	1	1	1	1	1	1	2	1	2	1	2	2	1	2	1	1	1	1	1	1	2	1	1	1	1	1	1	2	1	1	1	1	2	2	1
1036	1B	IWB10787	136.409	****	1	1	2	2	1	2	2	2	1	1	1	1	1	1	1	1	2	1	2	1	2	2	1	3	1	1	1	1	1	1	2	1	1	1	1	1	1	2	1	1	1	1	2	2	1
1037	1B	IWB3373	136.409	****	1	1	2	2	1	2	2	2	1	1	1	1	1	1	1	1	2	1	2	1	2	2	1	2	1	1	1	1	1	1	2	3	1	1	1	1	1	2	1	1	1	1	2	2	1
1038	1B	IWB62056	136.409	*****	1	1	2	2	3	2	2	2	1	1	1	1	1	1	1	1	2	1	2	1	2	2	1	2	1	1	1	1	1	1	2	1	1	1	1	1	1	2	1	1	1	1	2	2	1
1039	1B	IWB31693	136.409	****	1	1	2	2	1	2	2	2	1	1	1	1	1	1	1	1	2	1	2	1	2	2	1	2	1	1	1	1	1	1	2	1	1	1	1	1	1	2	1	1	1	1	2	2	1
1040	1B	IWB31715	136.409	*****	1	1	2	2	1	2	2	2	1	1	1	1	1	1	1	1	2	1	2	1	2	2	1	2	1	1	1	1	1	1	2	1	1	1	1	1	1	2	1	1	1	1	2	2	1
1041	1B	IWB73131	138.333	****	1	1	2	2	1	2	2	2	1	1	1	1	1	1	1	2	2	1	2	1	2	2	1	2	1	1	1	1	1	1	2	1	1	1	1	1	1	2	1	1	1	1	2	2	1
1042	1B	IWB73132	138.333	****	1	1	2	2	1	2	2	2	1	1	1	1	1	1	1	2	2	1	2	1	2	2	1	2	1	1	1	1	1	1	2	1	1	1	1	1	1	2	1	1	1	1	2	2	1
1043	1B	IWB23772	138.333	****	1	1	2	2	1	2	2	2	1	1	1	1	1	1	1	2	2	1	2	1	2	2	1	2	1	1	1	1	1	1	2	1	1	1	1	1	1	2	1	1	1	1	2	2	1
1044	1B	IWB28819	139.259	*****	1	1	2	2	1	1	2	2	1	1	1	1	1	1	1	2	2	1	2	1	1	2	1	2	1	1	1	1	1	1	2	1	1	1	1	1	1	2	1	1	1	1	2	2	1
1045	1B	IWB69702	139.259	*****	1	1	2	2	1	1	2	2	1	1	1	1	1	1	1	2	2	1	2	1	1	2	1	2	1	1	1	1	1	1	2	1	1	1	1	1	1	2	1	1	1	1	2	2	1
1046	1B	IWB7869	139.259	*****	1	1	2	3	1	1	2	2	1	1	1	1	1	1	1	2	2	1	3	1	1	2	1	3	1	1	1	1	1	1	2	1	1	1	1	1	1	2	1	1	1	1	2	2	1
1047	1B	IWB50473	139.259	*****	1	1	2	2	1	1	2	2	1	1	1	1	1	1	1	2	2	1	2	1	1	2	1	3	1	1	1	1	1	1	2	1	1	1	1	1	1	3	1	1	1	1	2	2	1
1048	1B	IWB40255	139.259	*****	1	1	2	2	1	1	2	2	1	1	1	1	1	1	1	2	2	1	2	1	1	2	1	2	1	1	1	1	1	1	2	3	1	1	1	1	1	2	1	1	1	1	2	2	1
1049	1B	IWB7868	139.259	*****	1	1	2	2	1	1	2	2	1	1	1	1	1	1	1	2	2	1	2	1	1	2	1	2	1	1	1	1	1	1	2	1	1	1	1	1	1	2	1	1	1	1	2	2	1
1050	1B	IWB31646	139.259	*****	1	1	2	2	1	1	2	2	1	1	1	1	1	1	1	2	2	1	2	1	1	2	1	2	1	1	1	1	1	1	2	1	1	1	1	1	1	2	1	1	1	1	2	2	1
1051	1B	IWB69700	139.259	*****	1	1	2	2	1	1	2	2	1	1	1	1	1	1	1	2	2	1	2	1	1	2	1	2	1	1	1	1	1	1	2	1	1	1	1	1	1	2	1	1	1	1	2	2	1
1052	1B	IWB78231	139.259	*****	1	1	2	2	1	1	2	2	1	1	1	1	1	1	1	2	2	1	2	1	1	2	1	3	1	1	1	1	1	1	2	1	1	1	1	1	1	2	1	1	1	1	2	2	1
1053	1B	IWB69701	139.259	*****	1	1	2	2	1	1	2	2	1	1	1	1	1	1	1	2	2	1	2	1	1	2	1	3	1	1	1	1	1	1	2	1	1	1	1	1	1	2	1	1	1	1	2	2	1
1054	1B	IWB7870	139.259	*****	1	1	2	2	1	1	2	2	1	1	1	1	1	1	1	2	2	1	2	1	1	2	1	2	1	1	1	1	1	1	2	1	1	1	1	1	1	2	1	1	1	1	2	2	1
1055	1B	IWB6507	139.259	*****	1	1	2	2	1	1	2	2	1	1	1	1	1	1	1	2	2	1	2	1	1	2	1	2	1	1	1	1	1	1	2	1	1	1	1	1	1	2	1	1	1	1	2	2	1
1056	1B	IWB69143	139.487	*****	1	1	2	2	1	1	2	2	1	1	1	1	1	1	1	2	2	1	2	1	1	2	1	2	1	1	1	1	1	1	2	1	1	1	1	1	1	2	1	1	1	1	2	2	1
1057	1B	IWB69144	139.487	*****	1	1	2	2	1	1	2	2	1	1	1	1	1	1	1	2	2	1	2	1	1	2	1	2	1	1	1	3	1	1	2	1	1	1	1	1	1	2	1	1	1	1	2	2	1
1058	1B	IWB13172	139.487	*****	1	1	2	2	1	1	2	2	1	1	1	1	1	1	1	2	2	1	2	1	1	2	1	2	1	1	1	3	1	1	2	1	1	1	1	1	1	2	1	1	1	1	2	2	1
1059	1B	IWB66543	139.487	*****	1	1	2	2	1	1	2	2	1	1	1	1	1	1	1	2	2	1	2	1	1	2	1	2	1	1	1	3	1	1	2	1	1	1	1	1	1	2	1	1	1	1	2	2	1
1060	1B	IWB69142	139.487	*****	1	1	2	2	1	1	2	2	1	1	1	1	1	1	1	2	2	1	2	1	1	2	1	2	1	1	1	1	1	1	2	1	1	1	1	1	1	2	1	1	1	1	2	2	1
1061	1B	IWB48712	141.893	*****	1	1	2	1	1	1	2	2	1	1	1	1	1	1	1	2	2	1	2	1	1	2	1	2	2	1	1	3	1	1	2	1	1	1	1	1	1	2	1	1	1	1	2	1	1
1062	1B	IWB48711	141.893	*****	1	1	2	1	1	1	2	2	1	1	1	1	1	1	1	2	2	1	2	1	1	2	1	2	2	1	1	3	1	1	2	1	1	1	1	1	3	2	1	1	1	1	2	1	1
1063	1B	IWB61363	141.893	*****	1	1	2	1	1	1	2	2	1	1	1	1	1	1	1	2	2	1	2	1	1	2	1	2	2	1	1	3	1	1	2	3	1	1	1	1	1	2	1	1	1	1	2	1	1
1064	1B	IWB39347	141.893	*****	1	1	2	1	1	1	2	2	1	1	1	1	1	1	1	2	2	1	2	1	1	2	1	2	2	1	1	3	1	1	2	1	1	1	1	1	1	2	1	1	1	1	2	1	1
1065	1B	IWB62262	141.893	*****	1	1	2	1	1	1	2	2	1	1	1	1	1	1	1	2	2	1	2	1	1	2	1	2	2	1	1	3	1	1	2	1	1	1	1	1	1	2	1	1	1	1	2	1	1
1066	1B	IWB31174	141.893	*****	1	1	2	1	1	1	2	2	1	1	1	1	1	1	1	2	2	1	2	1	1	2	1	2	2	1	1	3	1	1	2	1	1	1	1	1	1	2	1	1	1	1	2	1	1
1067	1B	IWB27960	141.893	*****	1	1	2	1	1	1	2	2	1	1	1	1	1	1	1	2	2	1	2	1	1	2	1	2	2	1	1	3	1	1	2	1	1	1	1	1	1	2	1	1	1	1	2	1	1
1068	1B	IWB48673	141.893	*****	1	1	2	1	1	1	2	2	1	1	1	1	1	1	1	2	2	1	2	1	1	2	1	2	2	1	1	2	1	1	2	1	1	1	1	1	1	2	1	1	1	1	2	1	1
1069	1B	IWB81191	142.356	*****	1	1	2	1	1	1	2	2	1	1	1	1	1	1	1	2	2	1	2	1	1	2	1	2	2	1	1	3	1	1	2	1	1	1	1	1	1	2	1	1	1	1	2	1	1
1070	1B	IWB81420	142.356	*****	1	1	2	1	1	1	2	2	1	1	1	1	1	1	1	2	2	1	2	1	1	2	1	3	2	1	1	3	1	1	2	1	1	1	1	1	1	2	1	1	1	1	2	1	1
1071	1B	IWB23021	142.59	*****	1	1	2	1	1	1	2	2	1	1	1	1	1	1	1	2	2	1	2	1	1	2	1	2	2	1	1	3	1	1	2	1	1	1	1	1	1	2	1	1	1	1	2	1	1
1072	1B	IWB40483	142.59	*****	1	1	2	1	1	1	2	2	1	1	1	1	1	1	1	2	2	1	2	1	1	2	1	2	2	1	1	3	1	1	2	3	1	1	1	1	1	2	1	1	1	1	2	1	1
1073	1B	IWB41175	142.59	*****	1	1	2	1	1	1	2	2	1	1	1	1	1	1	1	2	2	1	3	1	1	2	1	3	2	1	1	1	1	1	2	1	1	1	1	1	1	2	1	1	1	1	2	1	1
1074	1B	IWB625	142.59	*****	1	1	2	1	1	1	2	2	1	1	1	1	1	1	1	2	2	1	2	1	1	2	1	2	2	1	1	1	1	1	2	1	1	1	1	1	1	2	1	1	1	1	2	1	1
1075	1B	IWB31676	142.59	*****	1	1	2	1	1	1	2	2	1	1	1	1	1	1	1	2	2	1	2	1	1	2	1	2	2	1	1	3	1	1	2	3	1	1	1	1	1	2	1	1	1	1	2	1	1
1076	1B	IWB59155	142.59	*****	1	1	2	1	1	1	2	2	1	1	1	1	1	1	1	2	2	1	2	1	1	2	1	2	2	1	1	3	1	1	2	1	1	1	1	1	1	2	1	1	1	1	2	1	1
1077	1B	IWB43860	142.59	*****	1	1	2	1	1	1	2	2	1	1	1	1	1	1	1	2	2	1	2	1	1	2	1	2	2	1	1	3	1	1	2	1	1	1	1	1	1	2	1	1	1	1	2	1	1
1078	1B	IWB7694	142.82	*****	1	1	2	1	1	1	2	2	1	1	1	1	1	1	1	2	2	1	2	1	1	2	1	2	2	1	1	3	1	1	2	1	1	1	1	1	1	2	1	1	1	1	2	1	1
1079	1B	IWB41428	142.82	*****	1	1	2	1	1	1	2	2	1	1	1	1	1	1	1	2	2	1	2	1	1	2	1	2	2	1	1	3	1	1	2	1	1	1	1	1	1	2	1	1	1	1	2	1	1
1080	1B	IWB61014	143.05	*****	1	1	2	1	1	1	2	2	1	1	1	1	1	1	1	2	2	1	2	1	1	2	1	2	2	1	1	3	1	1	2	1	1	1	1	1	1	2	1	2	1	1	2	1	1
1081	1B	IWB77967	143.05	*****	1	1	2	1	1	1	2	2	1	1	1	1	1	1	1	2	2	1	2	1	1	2	1	2	2	1	1	3	1	1	2	3	1	1	1	1	1	2	1	2	1	1	2	1	1
1082	1B	IWB72835	143.284	*****	1	1	2	1	1	1	2	2	1	1	1	1	1	1	1	2	2	1	2	1	1	2	1	2	2	1	1	3	1	1	2	1	1	1	1	1	1	2	1	2	1	1	2	1	1
1083	1B	IWB71943	143.284	*****	1	1	2	1	1	1	2	2	1	1	1	1	1	1	1	2	2	1	2	1	1	2	1	2	2	1	1	3	1	1	2	1	1	1	1	1	1	2	1	2	1	1	2	1	1
1084	1B	IWB48895	143.284	*****	1	1	2	1	1	1	2	2	1	1	1	1	1	1	1	2	2	1	2	1	1	2	1	2	2	1	1	3	1	1	2	1	1	1	1	1	1	2	1	2	1	1	2	1	1
1085	1B	IWB4454	143.284	*****	1	1	2	1	1	1	2	2	1	1	1	1	1	1	1	2	2	1	2	1	1	2	1	2	2	1	1	3	1	1	2	1	1	1	1	1	1	2	1	2	1	1	2	1	1
1086	1B	IWB14703	143.284	*****	1	1	2	1	1	1	2	2	1	1	1	1	1	1	1	2	2	1	2	1	1	2	1	2	2	1	1	3	1	1	2	1	1	1	1	1	1	2	1	2	1	1	2	1	1
1087	1B	IWB75925	143.284	*****	1	1	2	1	1	1	2	2	1	1	1	1	1	1	1	2	2	1	2	1	1	2	1	2	2	1	1	3	1	1	2	1	1	1	1	1	1	2	1	2	1	1	2	1	1
1088	1B	IWB75926	143.284	*****	1	1	2	1	1	1	2	2	1	1	1	1	1	1	1	2	2	1	2	1	1	2	1	2	2	1	1	3	1	1	2	1	1	1	1	1	1	2	1	2	1	1	2	1	1
1089	1B	IWB20729	143.745	*****	1	1	1	1	1	1	2	2	1	1	1	1	1	1	1	2	2	1	2	1	1	2	1	2	2	1	1	3	1	1	2	1	1	1	1	1	1	2	1	2	1	1	2	1	1
1090	1B	IWB34935	143.745	*****	1	1	1	1	1	1	2	2	1	1	1	1	1	1	1	2	2	1	2	1	1	2	1	2	2	1	1	3	1	1	2	1	1	1	1	1	1	2	1	2	1	1	2	1	1
1091	1B	IWB8097	143.745	*****	1	1	1	1	1	1	2	2	1	1	1	1	1	1	1	2	2	1	2	1	1	2	1	2	2	1	1	3	1	1	2	1	1	1	1	1	1	2	1	2	1	1	2	1	1
1092	1B	IWB78150	143.745	*****	1	1	1	1	1	1	2	2	1	1	1	1	1	1	1	2	2	1	2	1	1	2	1	2	2	1	1	3	1	1	2	1	1	1	1	1	1	2	1	2	1	1	2	1	1
1093	1B	IWB22618	143.745	*****	1	3	1	1	1	1	2	2	1	1	1	1	1	1	1	2	2	1	2	1	1	2	1	2	2	1	1	3	1	1	2	1	1	1	1	1	1	2	1	2	1	1	2	1	1
1094	1B	IWB65512	143.745	*****	1	3	1	1	1	1	2	2	1	1	1	1	1	1	1	2	2	1	2	1	1	2	1	2	2	1	1	3	1	1	2	1	1	1	1	1	1	2	1	2	1	1	2	1	1
1095	1B	IWB72033	143.745	*****	1	3	1	1	1	1	2	2	1	1	1	1	1	1	1	2	2	1	2	1	1	2	1	2	2	1	1	3	1	1	2	1	1	1	1	1	1	2	1	2	1	1	2	1	1
1096	1B	IWB72032	143.745	*****	1	3	1	1	1	1	2	2	1	1	1	1	1	1	1	2	2	1	2	1	1	2	1	2	2	1	1	3	1	1	2	1	1	1	1	1	1	2	1	2	1	1	2	1	1
1097	1B	IWB72031	143.745	*****	1	3	1	1	1	1	2	2	1	1	1	1	1	1	1	2	2	1	2	1	1	2	1	2	2	1	1	3	1	1	2	1	1	1	1	1	1	2	1	2	1	1	2	1	1
1098	1B	IWB72030	143.745	*****	1	3	1	1	1	1	2	2	1	1	1	1	1	1	1	2	2	1	2	1	1	2	1	2	2	1	1	3	1	1	2	1	1	1	1	1	1	2	1	2	1	1	2	1	1
1099	1B	IWB71886	143.745	*****	1	3	1	1	1	1	2	2	1	1	1	1	1	1	1	2	2	1	2	1	1	2	1	2	2	1	1	3	1	1	2	1	1	1	1	1	1	2	1	2	1	1	2	1	1
1100	1B	IWB28614	143.745	*****	1	1	1	1	1	1	2	2	1	1	1	1	1	1	1	2	2	1	2	1	1	2	1	2	2	1	1	3	1	1	2	1	1	1	1	1	1	2	1	2	1	1	2	1	1
1101	1B	IWB72029	143.745	*****	1	3	1	1	1	1	2	2	1	1	1	1	1	1	1	2	2	1	2	1	1	2	1	2	2	1	1	3	1	1	2	1	1	1	1	1	1	2	1	2	1	1	2	1	1
1102	1B	IWB71884	143.745	*****	1	3	1	1	1	1	2	2	1	1	1	1	1	1	1	2	2	1	2	1	1	2	1	2	2	1	1	3	1	1	2	1	1	1	1	1	1	2	1	2	1	1	2	1	1
1103	1B	IWB47986	143.745	*****	1	3	1	1	1	1	2	2	1	1	1	1	1	1	1	2	2	1	2	1	1	2	1	2	2	1	1	3	1	1	2	3	1	1	1	1	1	2	1	2	1	1	2	1	1
1104	1B	IWB71885	143.745	*****	1	3	1	1	1	1	2	2	1	1	1	1	1	1	1	2	2	1	2	1	1	2	1	2	2	1	1	3	1	1	2	3	1	1	1	1	1	2	1	2	1	1	2	1	1
1105	1B	IWB5732	149.827	****	1	1	1	1	1	1	2	2	1	1	1	1	1	1	1	2	2	1	1	1	1	2	1	2	2	1	1	3	1	1	2	1	1	2	1	1	1	2	1	2	1	1	2	1	1
1106	1B	IWB11634	150.294	*****	1	1	1	1	1	1	2	2	1	1	1	1	1	1	2	2	2	1	1	1	1	2	1	3	2	1	1	1	1	1	2	1	1	2	1	1	1	2	1	2	1	1	2	1	1
1107	1B	IWB34471	150.294	****	1	1	1	1	1	1	2	2	1	1	1	1	1	1	2	2	2	1	1	1	1	2	1	3	2	1	1	1	1	1	2	1	1	2	1	1	1	2	1	2	1	1	2	1	1
1108	1B	IWB4839	150.294	****	1	1	1	1	1	1	2	2	1	1	1	1	1	1	2	2	2	1	1	1	1	2	1	3	2	1	1	1	1	1	2	1	1	2	1	1	1	2	1	2	1	1	2	1	1
1109	1B	IWB9706	150.294	****	1	1	1	1	1	1	2	2	1	1	1	1	1	1	2	2	2	1	1	1	1	2	1	2	2	1	1	1	1	1	2	1	1	2	1	1	1	2	1	2	1	1	2	1	1
1110	1B	IWB7427	150.294	*****	1	1	1	1	1	1	2	3	1	1	1	1	1	1	2	3	2	1	1	1	1	2	1	3	2	1	1	1	1	1	2	1	1	2	1	1	1	2	1	2	1	1	2	1	1
1111	1B	IWB8053	150.294	*****	1	1	1	1	1	1	2	2	1	1	1	1	1	1	2	2	2	1	1	1	1	2	1	3	2	1	1	1	1	1	2	1	1	3	1	1	1	2	1	2	1	1	2	1	1
1112	1B	IWB28298	150.294	****	1	1	1	1	1	1	2	2	1	1	1	1	1	1	2	2	2	1	1	1	1	2	1	2	2	1	1	1	1	1	2	3	1	2	1	1	1	2	1	2	1	1	2	1	1
1113	1B	IWB22483	150.294	****	1	1	1	1	1	1	2	2	1	1	1	1	1	1	2	2	2	1	1	1	1	2	1	2	2	1	1	1	1	1	2	3	1	2	1	1	1	2	1	2	1	1	2	1	1
1114	1B	IWB5678	150.294	****	1	1	1	1	1	1	2	2	1	1	1	1	1	1	2	2	2	1	1	1	1	2	1	2	2	1	1	1	1	1	2	1	1	2	1	1	1	2	1	2	1	1	2	1	1
1115	1B	IWB21823	152.967	***	1	1	1	1	1	1	2	2	1	1	1	1	1	1	2	2	2	1	1	1	1	2	1	2	2	1	2	1	1	1	2	1	1	2	1	1	1	2	1	2	1	1	2	1	1
1116	1B	IWB41450	152.967	***	1	1	1	1	1	1	2	2	1	1	1	1	1	1	2	2	2	1	1	1	1	2	1	2	2	1	2	1	1	1	2	1	1	2	1	1	1	2	1	2	1	1	2	1	1
1117	1B	IWB72918	152.967	***	1	1	1	1	1	1	2	2	1	1	1	1	1	1	2	2	2	1	1	1	1	2	1	2	2	1	2	1	1	1	2	1	1	2	1	1	1	2	1	2	1	1	2	1	1
1118	1B	IWB44710	152.967	***	1	1	1	1	1	1	2	2	1	1	1	1	1	1	2	2	2	1	1	1	1	2	1	2	2	1	2	1	1	1	2	1	1	2	1	1	1	2	1	2	1	1	2	3	1
1119	1B	IWB13853	153.671	**	1	1	1	1	1	1	2	2	1	1	2	1	1	1	2	2	2	1	1	1	1	2	1	2	2	1	2	1	1	1	2	1	1	2	1	1	1	2	1	2	1	1	2	1	1
1120	1B	IWB965	153.671	**	1	1	1	1	1	1	2	2	1	1	2	1	1	1	2	2	2	1	1	1	1	2	1	2	2	1	2	1	1	1	2	1	1	2	1	1	1	2	1	2	1	1	2	1	1
1121	1B	IWB12210	154.136	**	1	1	1	1	1	1	2	2	1	1	2	1	1	1	2	2	2	1	1	1	1	2	1	2	2	1	2	1	1	1	2	1	1	2	1	1	1	2	1	2	1	1	2	1	1
1122	1B	IWB12335	154.136	**	1	1	1	1	1	1	2	2	1	1	2	1	1	1	2	2	2	1	1	1	1	2	1	2	2	1	2	1	1	1	2	1	1	2	1	1	1	2	1	2	1	1	2	1	1
1123	1B	IWB9613	154.136	**	1	1	1	1	1	1	2	2	1	1	2	1	1	1	2	2	2	1	1	1	1	2	1	2	2	1	2	1	1	1	2	1	1	2	1	1	1	2	1	2	1	1	2	1	1
1124	1B	IWB8817	154.136	**	1	1	1	1	1	1	2	2	1	1	2	1	1	1	2	2	2	1	1	1	1	2	1	2	2	1	2	1	1	1	2	1	1	2	1	1	1	2	1	2	1	1	2	1	1
1125	1B	IWB18787	154.136	**	1	1	1	1	1	1	2	2	1	1	2	1	1	1	2	2	2	1	1	1	1	2	1	2	2	1	2	1	1	1	2	1	1	2	1	1	1	2	1	2	1	1	2	1	1
1126	1B	IWB62487	155.066	**	1	1	1	1	1	1	2	2	1	1	2	1	1	1	2	2	2	1	1	1	1	2	1	2	2	1	2	1	1	1	2	1	1	2	1	1	1	2	1	2	1	1	2	1	1
1127	1B	IWB73714	155.066	**	1	1	1	1	1	1	2	2	1	1	2	1	1	1	2	2	2	1	1	1	1	2	1	2	2	1	2	1	1	1	2	1	1	2	1	1	1	2	1	2	1	1	2	1	1
1128	1B	IWB73713	155.066	**	1	1	1	1	1	1	2	2	1	1	2	1	1	1	2	2	2	1	1	1	1	2	1	2	2	1	2	1	1	1	2	1	1	2	1	1	1	2	1	2	1	1	2	1	1
1129	1B	IWB35087	155.066	**	1	1	1	1	1	1	2	2	1	1	2	1	1	1	2	2	2	1	1	1	1	2	1	2	2	1	2	1	1	1	2	1	1	2	1	1	1	2	1	2	1	1	2	1	1
1130	1B	IWB6488	156.981		1	1	1	1	1	1	2	2	1	1	2	1	2	1	2	2	2	1	1	1	1	2	1	2	2	1	2	1	1	1	2	1	1	2	1	1	1	2	1	2	1	1	2	1	1
1131	1B	IWB9772	156.981		1	1	1	1	1	1	2	2	1	1	2	1	2	1	2	2	2	1	1	1	1	2	1	2	2	1	2	1	1	1	2	1	1	2	1	1	1	2	1	2	1	1	2	1	1
1132	1B	IWB9040	157.446		1	1	1	1	1	1	2	2	1	1	2	1	2	1	2	2	2	1	1	1	1	2	1	2	2	1	2	1	1	1	2	1	1	2	1	1	1	2	1	2	1	1	2	1	1
1133	1B	IWB72243	157.446		1	1	1	1	1	1	2	2	1	1	2	1	2	1	2	2	2	1	1	1	1	2	1	2	2	1	2	1	1	1	2	1	1	2	1	1	1	2	1	2	1	1	2	1	1
1134	1B	IWB13057	157.446		1	1	1	1	1	1	2	2	1	1	2	1	2	1	2	2	2	1	1	1	1	2	1	2	2	1	2	1	1	1	2	1	1	2	1	1	1	2	1	2	1	1	2	1	1
1135	1B	IWB72247	157.446		1	1	1	1	1	1	2	2	1	1	2	1	2	1	2	2	2	1	1	1	1	2	1	2	2	1	2	1	1	1	2	1	1	2	1	1	1	2	1	2	1	1	2	1	1
1136	1B	IWB79603	157.446		1	1	1	1	1	1	2	2	1	1	2	1	2	1	2	2	2	1	1	1	1	2	1	2	2	1	2	1	1	1	2	1	1	2	1	1	1	2	1	2	1	1	2	1	1
1137	1B	IWB7254	157.446		1	1	1	1	1	1	2	2	1	1	2	1	2	1	2	2	2	1	1	1	1	2	1	2	2	1	2	1	1	1	2	1	1	2	1	1	1	2	1	2	1	1	2	1	1
1138	1B	IWB7948	157.446		1	1	1	1	1	1	2	2	1	1	2	1	2	1	2	2	2	1	1	1	1	2	1	2	2	1	2	1	1	1	2	1	1	2	1	1	1	2	1	2	1	1	2	1	1
1139	1B	IWB53366	157.446		1	1	1	1	1	1	2	2	1	1	2	1	2	1	2	2	2	1	1	1	1	2	1	2	2	1	2	1	1	1	2	1	1	2	1	1	1	2	1	2	1	1	2	1	1
1140	1B	IWB3449	157.446		1	1	1	1	1	1	2	2	1	1	2	1	2	1	2	2	2	1	1	1	1	2	1	2	2	1	2	1	1	1	2	1	1	2	1	1	1	2	1	2	1	1	2	1	1
1141	1B	IWB2673	157.446		1	1	1	1	1	1	2	2	1	1	2	1	2	1	2	2	2	1	1	1	1	2	1	2	2	1	2	1	1	1	2	1	1	2	1	1	1	2	1	2	1	1	2	1	1
1142	1B	IWB80328	157.446		1	1	1	1	1	1	2	2	1	1	2	1	2	1	2	2	2	1	1	1	1	2	1	2	2	1	2	1	1	1	2	1	1	2	1	1	1	2	1	2	1	1	2	1	1
1143	1B	IWB72245	157.446		1	1	1	1	1	1	2	2	1	1	2	1	2	1	2	2	2	1	1	1	1	2	1	2	2	1	2	1	1	1	2	1	1	2	1	1	1	2	1	2	1	1	2	1	1
1144	1B	IWB41436	157.446		1	1	1	1	1	1	2	2	1	1	2	1	2	1	2	2	2	1	1	1	1	2	1	2	2	1	2	1	1	1	2	1	1	2	1	1	1	2	1	2	1	1	2	1	1
1145	1B	IWB258	157.446		1	1	1	1	1	1	2	2	1	1	2	1	2	1	2	2	2	1	1	1	1	2	1	2	2	1	2	1	1	1	2	1	1	2	1	1	1	2	1	2	1	1	2	1	1
1146	1B	IWB76195	157.446		1	1	1	1	1	1	2	2	1	1	2	1	2	1	2	2	2	1	1	1	1	2	1	2	2	1	2	1	1	1	2	1	1	2	1	1	1	2	1	2	1	1	2	1	1
1147	1B	IWB71396	157.446		1	1	1	1	1	1	2	2	1	1	2	1	3	1	2	2	2	1	1	1	1	3	1	3	2	1	2	1	1	1	2	3	1	2	1	1	1	2	1	2	1	1	2	1	1
1148	1B	IWB36253	157.446		1	1	1	1	1	1	2	2	1	1	2	1	2	1	2	2	2	1	1	1	1	2	1	2	2	1	2	1	1	1	2	3	1	2	1	1	1	2	1	2	1	1	2	1	1
1149	1B	IWB7523	157.446		1	1	1	1	1	1	2	2	1	1	2	1	2	1	2	2	2	1	1	1	1	2	1	2	2	1	2	1	1	1	2	3	1	2	1	1	1	2	1	2	1	1	2	1	1
1150	1B	IWB74944	157.446		1	1	1	1	1	1	2	2	1	1	2	1	2	1	2	2	2	1	1	1	1	2	1	2	2	1	2	1	1	1	2	3	1	2	1	1	1	2	1	2	1	1	2	1	1
1151	1B	IWB9662	157.446		1	1	1	1	1	1	2	2	1	1	2	1	2	1	2	2	2	1	1	1	1	2	1	3	2	1	2	1	1	1	2	1	1	2	1	1	1	2	1	2	1	1	2	1	1
1152	1B	IWB8899	157.446		1	1	1	1	1	1	2	2	1	1	2	1	2	1	2	2	2	1	1	1	1	2	1	3	2	1	2	1	1	1	2	1	1	2	1	1	1	2	1	2	1	1	2	1	1
1153	1B	IWB11800	157.446		1	1	1	1	1	1	2	2	1	1	2	1	2	1	2	2	2	1	1	1	1	2	1	3	2	1	2	1	1	1	2	1	1	2	1	1	1	2	1	2	1	1	2	1	1
1154	1B	IWB3257	157.446		1	1	1	1	1	1	2	2	1	1	2	1	2	1	2	2	2	1	1	1	1	2	1	2	2	1	2	1	1	1	2	1	1	2	1	1	1	2	1	2	1	1	2	1	1
1155	1B	IWB72244	157.446		1	1	1	1	3	1	2	2	1	1	2	1	2	1	2	2	2	1	1	1	1	2	1	2	2	1	2	1	1	1	2	1	1	2	1	1	1	2	1	2	1	1	2	1	1
1156	1B	IWB68096	162.027		1	1	1	1	2	1	2	2	1	1	2	1	2	1	2	2	2	1	2	1	1	1	1	2	2	1	2	1	1	1	2	1	1	2	1	1	1	2	1	2	1	1	2	1	1
1157	1B	IWB6700	162.26		1	1	1	1	2	1	2	2	1	1	2	1	2	1	2	2	2	1	2	1	1	1	1	2	2	1	2	1	1	1	2	1	1	2	1	1	1	2	1	2	1	1	2	1	1
1158	1B	IWB31957	162.49		1	1	1	1	2	1	2	2	1	1	2	1	2	1	2	2	2	1	2	1	1	1	1	2	2	1	2	1	1	1	2	1	1	2	1	1	1	2	1	2	1	1	2	1	1
1159	1B	IWB20993	163.434		1	1	1	1	2	1	2	2	1	1	2	1	2	1	2	2	2	1	2	1	1	1	1	2	2	1	2	1	1	1	2	1	1	2	1	1	1	2	1	2	1	1	2	1	1
1160	1B	IWB48378	163.434		1	1	1	1	2	1	2	2	1	1	2	1	2	1	2	2	2	1	2	1	1	1	1	2	2	1	2	1	1	1	2	3	1	2	1	1	1	2	1	2	1	1	2	1	1
1161	1B	IWB31066	163.434		1	1	1	1	2	1	2	2	1	1	2	1	2	1	2	2	2	1	2	1	1	1	1	2	2	1	2	1	1	1	2	3	1	2	1	1	1	2	1	2	1	1	2	1	1
1162	1B	IWB29845	163.434		1	1	1	1	2	1	2	2	1	1	2	1	2	1	2	2	2	1	2	1	1	1	1	2	2	1	2	1	1	1	2	3	1	2	1	1	1	2	1	2	1	1	2	1	1
1163	1B	IWB49490	163.434		1	1	1	1	2	1	2	2	1	1	2	1	2	1	2	2	2	1	2	1	1	1	1	2	2	1	2	1	1	1	2	3	1	2	1	1	1	2	1	2	1	1	2	1	1
1164	1B	IWB49442	163.434		1	1	1	1	2	1	2	2	1	1	2	1	2	1	2	2	2	1	2	1	1	1	1	2	2	1	2	1	1	1	2	3	1	2	1	1	1	2	1	2	1	1	2	1	1
1165	1B	IWB48380	163.434		1	1	1	1	2	1	2	2	1	1	2	1	2	1	2	2	2	1	2	1	1	1	1	2	2	1	2	1	1	1	2	3	1	2	1	1	1	2	1	2	1	1	2	1	1
1166	1B	IWB62079	163.434		1	1	1	1	2	1	2	2	1	1	2	1	2	1	2	2	2	1	2	1	1	1	1	2	2	1	2	1	1	1	2	1	1	2	1	1	1	2	1	2	1	1	2	1	1
1167	1B	IWB70859	164.135		1	1	1	1	2	1	2	2	1	1	2	1	2	1	2	2	2	1	2	1	1	1	1	2	2	1	2	1	1	1	2	1	1	2	1	1	1	2	1	2	1	1	2	1	1
1168	1B	IWB38247	164.135		1	1	1	1	2	1	2	2	1	1	2	1	2	1	2	2	2	1	2	1	1	1	1	3	2	1	2	1	1	1	2	1	1	2	1	1	1	2	1	2	1	1	2	1	1
1169	1B	IWB44844	164.135		1	1	1	1	2	1	2	2	1	1	2	1	2	1	2	2	2	1	2	1	1	1	1	2	2	1	2	1	1	1	2	1	1	2	1	1	1	2	1	2	1	1	2	1	1
1170	1B	IWB71971	164.135		1	1	1	1	2	1	2	2	1	1	2	1	2	1	2	2	2	1	2	1	1	1	1	2	2	1	2	1	1	1	2	1	1	2	1	1	1	2	1	2	1	1	2	1	1
1171	1B	IWB11265	164.135		1	1	1	1	2	1	2	2	1	1	2	1	2	1	2	2	2	1	2	1	1	1	1	2	2	1	2	1	1	1	2	1	1	2	1	1	1	2	1	2	1	1	2	1	1
1172	1B	IWB78964	164.135		1	1	1	1	2	1	2	2	1	1	2	1	2	1	2	2	2	1	2	1	1	1	1	2	2	1	2	1	1	1	2	1	1	2	1	1	1	2	1	2	1	1	2	1	1
1173	1B	IWB44843	164.135		1	1	1	1	2	1	2	2	1	1	2	1	2	1	2	2	2	1	2	1	1	1	1	2	2	1	2	1	1	1	2	1	1	2	1	1	1	2	1	2	1	1	2	1	1
1174	1B	IWB43763	164.135		1	1	1	1	2	1	2	2	1	1	2	1	2	1	2	2	2	1	2	1	1	1	1	2	2	1	2	1	1	1	2	1	1	2	1	1	1	2	1	2	1	1	2	1	1
1175	1B	IWB71898	164.135		1	1	1	1	2	1	2	2	1	1	2	1	2	1	2	2	2	1	2	1	1	1	1	2	2	1	2	1	1	1	2	3	1	2	1	1	1	2	1	2	1	1	2	1	1
1176	1B	IWB9889	164.135		1	1	1	1	2	1	2	2	1	1	2	1	2	1	2	2	2	1	2	1	1	1	1	2	2	1	2	1	1	1	2	1	1	2	1	1	1	2	1	2	1	1	2	1	1
1177	1B	IWB28101	164.135		1	1	1	1	2	1	2	2	1	1	2	1	2	1	2	2	2	1	2	1	1	1	1	2	2	1	2	1	1	1	2	1	1	2	1	1	1	2	1	2	1	1	2	1	1
1178	1B	IWB49691	164.135		1	1	1	1	2	1	2	2	1	1	2	1	2	1	2	2	2	1	2	1	1	1	1	2	2	1	2	1	1	1	2	1	1	2	1	1	1	2	1	2	1	1	2	1	1
1179	1B	IWB71384	165.571		1	1	1	1	2	1	2	2	1	1	2	1	2	1	2	2	2	1	2	1	1	1	1	2	2	1	2	1	1	1	2	1	1	2	1	1	1	2	1	2	1	1	2	1	1
1180	1B	IWB41609	165.571		1	1	1	1	2	1	2	2	1	1	2	1	2	1	2	2	2	1	2	1	1	1	1	2	2	1	2	1	1	1	2	3	1	2	1	1	1	2	1	2	1	1	2	1	1
1181	1B	IWB72626	165.571		1	1	1	1	2	1	2	2	1	1	2	1	2	1	2	2	2	1	2	1	1	1	1	2	2	1	2	1	1	1	2	3	1	2	1	1	1	2	1	2	1	1	2	1	1
1182	1B	IWB72625	165.571		1	1	1	1	2	1	2	2	1	1	2	1	2	1	2	2	2	1	2	1	1	1	1	2	2	1	2	1	1	1	2	3	1	2	1	1	1	2	1	2	1	1	2	1	1
1183	1B	IWB73765	165.571		1	1	1	1	2	1	2	2	1	1	2	1	2	1	2	2	2	1	2	1	1	1	1	2	2	1	2	1	1	1	2	1	1	2	1	1	1	2	1	2	1	1	2	1	1
1184	1B	IWB76772	165.571		1	1	1	1	2	1	2	2	1	1	2	1	2	1	2	2	2	1	2	1	1	1	1	2	2	1	2	1	1	1	2	1	1	2	1	1	1	2	1	2	1	1	2	1	1
1185	1B	IWB12221	165.571		1	1	1	1	2	1	2	2	1	1	2	1	2	1	2	2	2	1	2	1	1	1	1	2	2	1	2	1	1	1	2	1	1	2	1	1	1	2	1	2	1	1	2	1	1
1186	1B	IWB73820	165.571		1	1	1	1	2	1	2	2	1	1	2	1	2	1	2	2	2	1	2	1	1	1	1	2	2	1	2	1	1	1	2	1	1	2	1	1	1	2	1	2	1	1	2	1	1
1187	1B	IWB72748	166.034		1	1	1	1	2	1	2	2	1	1	2	1	2	1	2	2	2	1	2	1	1	1	1	2	2	1	2	1	1	1	2	1	1	2	1	1	1	2	1	2	1	1	2	1	1
1188	1B	IWB71870	166.034		1	1	1	1	2	1	2	2	1	1	2	1	2	1	2	2	2	1	2	1	1	1	1	2	2	1	2	1	1	1	2	1	1	2	1	1	1	2	1	2	1	1	2	1	1
1	2A	IWB73116	0		2	1	1	2	2	1	2	1	1	1	2	2	1	2	1	1	1	1	2	2	2	1	2	2	2	2	1	2	2	2	2	2	2	1	2	1	2	1	1	2	2	2	1	2	2
2	2A	IWB7398	0.234738		2	1	1	2	2	1	2	1	1	1	2	2	1	2	1	1	1	1	2	2	2	1	2	2	2	2	1	2	2	2	2	2	2	1	2	1	2	1	1	2	2	2	1	2	2
3	2A	IWB30801	0.234738		2	1	1	2	2	1	2	1	1	1	2	2	1	2	1	1	1	1	2	2	2	1	2	2	2	2	1	2	2	2	2	2	2	1	2	1	2	1	1	2	2	2	1	2	2
4	2A	IWB80073	0.234738		2	1	1	2	2	1	2	1	1	1	2	2	1	2	1	1	1	1	2	2	2	1	2	2	2	2	1	2	2	2	2	2	2	1	2	1	2	1	1	2	2	2	1	2	2
5	2A	IWB79356	0.234738		2	1	1	2	2	1	2	1	1	1	2	2	1	2	1	1	1	1	2	2	2	1	2	2	2	2	1	2	2	2	2	2	2	1	2	1	2	1	1	2	2	2	1	2	2
6	2A	IWB30883	0.234738		2	1	1	2	2	1	2	1	1	1	2	2	1	2	1	1	1	1	2	2	2	1	2	2	2	2	1	2	2	2	2	2	2	1	2	1	2	1	1	2	2	2	1	2	2
7	2A	IWB76319	0.234738		2	1	1	2	2	1	2	1	1	1	2	2	1	2	1	1	1	1	2	2	2	1	2	2	2	2	1	2	2	2	2	2	2	1	2	1	2	1	1	2	2	2	1	2	2
8	2A	IWB79295	0.234738		2	1	1	2	2	1	2	1	1	1	2	2	1	2	1	1	1	1	2	2	2	1	2	2	2	2	1	2	2	2	2	2	2	1	2	1	2	1	1	2	2	2	1	2	2
9	2A	IWB77032	0.234738		2	1	1	2	2	1	2	1	1	1	2	2	1	2	1	1	1	1	2	2	2	1	2	2	2	2	1	2	2	2	2	2	2	1	2	1	2	1	1	2	2	2	1	2	2
10	2A	IWB20060	0.234738		2	1	1	2	2	1	2	1	1	1	2	2	1	2	1	1	1	1	2	2	2	1	2	2	2	2	1	2	2	2	2	2	2	1	2	1	2	1	1	2	2	2	1	2	2
11	2A	IWB30800	0.234738		2	1	1	2	2	1	2	1	1	1	2	2	1	2	1	1	1	1	2	2	2	1	2	2	2	2	1	2	2	2	2	2	2	1	2	1	2	1	1	2	2	2	1	2	2
12	2A	IWB76320	0.234738		2	1	1	2	2	1	2	1	1	1	2	2	1	2	1	1	1	1	2	2	2	1	2	2	2	2	1	2	2	2	2	2	2	1	2	1	2	1	1	2	2	2	1	2	2
13	2A	IWB25480	0.234738		2	1	1	2	2	1	2	1	1	1	2	2	3	2	1	1	1	1	2	2	2	1	2	2	2	2	1	2	2	2	2	2	2	1	2	1	2	1	1	2	2	2	1	2	2
14	2A	IWB80003	0.234738		2	1	1	2	2	1	2	1	1	1	2	2	1	2	1	1	1	1	2	2	2	1	2	2	2	2	1	2	2	2	2	3	2	1	2	1	2	1	1	2	2	2	1	2	2
15	2A	IWB20059	0.234738		2	1	1	2	2	1	2	1	1	1	2	2	3	2	1	1	1	1	2	2	2	1	2	2	2	2	1	2	2	2	2	2	2	1	2	1	2	1	1	2	2	2	1	2	2
16	2A	IWB79294	0.234738		2	1	1	2	2	1	2	1	1	1	2	2	1	2	1	1	1	1	2	2	2	1	2	2	2	2	1	2	2	2	2	2	2	1	2	1	2	1	1	2	2	2	1	2	2
17	2A	IWB72492	0.234738		2	1	1	2	2	1	2	1	1	1	2	2	1	2	1	1	1	1	2	2	2	1	2	2	2	2	1	2	2	2	2	2	2	1	2	1	2	1	1	2	2	2	1	2	2
18	2A	IWB31328	0.234738		2	1	1	2	2	1	2	1	1	1	2	2	1	2	1	1	1	1	2	2	2	1	2	2	2	2	1	2	2	2	2	2	2	1	2	1	2	1	1	2	2	2	1	2	2
19	2A	IWB72489	0.467293		2	2	1	2	2	1	2	1	1	1	2	2	1	2	1	1	1	1	2	2	2	1	2	2	2	2	1	2	2	2	2	2	2	1	2	1	2	1	1	2	2	2	1	2	2
20	2A	IWB72491	0.467293		2	2	1	2	2	1	2	1	1	1	2	2	1	2	1	1	1	1	2	2	2	1	2	2	2	2	1	2	2	2	2	2	2	1	2	1	2	1	1	2	2	2	1	2	2
21	2A	IWB72490	0.467293		2	2	1	2	2	1	2	1	1	1	2	2	1	2	1	1	1	1	2	2	2	1	2	2	2	2	1	2	2	2	2	2	2	1	2	1	2	1	1	2	2	2	1	2	2
22	2A	IWB25949	0.93678		2	2	1	2	2	1	2	1	1	1	2	2	1	2	1	1	1	1	2	2	2	1	2	2	2	2	1	2	2	2	2	2	2	1	2	1	2	1	1	2	1	2	1	2	2
23	2A	IWB64569	0.93678		2	2	1	2	2	1	2	1	1	1	2	2	1	2	1	1	1	1	2	2	2	1	2	2	2	2	1	2	2	2	2	2	2	1	2	1	2	1	1	2	1	2	1	2	2
24	2A	IWB14640	0.93678		2	2	1	2	2	1	2	1	1	1	2	2	1	2	1	1	1	1	2	2	2	1	2	2	2	2	1	2	2	2	2	2	2	1	2	1	2	1	1	2	1	2	1	2	2
25	2A	IWB34867	1.17152		2	2	1	2	2	1	2	1	1	1	2	2	1	2	1	1	1	1	2	2	2	1	2	2	2	2	1	2	2	2	2	2	2	1	2	1	2	1	1	2	1	2	1	2	2
26	2A	IWB42601	1.17152		2	2	1	2	2	1	2	1	1	1	2	2	1	2	1	1	1	1	2	2	2	1	2	2	2	2	1	2	2	2	2	2	2	1	2	1	2	1	1	2	1	2	1	2	2
27	2A	IWB65522	1.4119		2	2	1	2	2	1	2	3	1	1	2	2	1	2	1	1	1	1	2	2	2	1	2	2	2	2	1	2	2	2	2	3	2	1	2	1	2	1	1	2	1	2	1	2	2
28	2A	IWB11273	1.4119		2	2	1	2	2	1	2	1	1	1	2	2	1	2	1	1	1	1	2	2	2	1	2	2	2	2	1	2	2	2	2	2	2	1	2	1	2	1	1	2	1	2	1	2	2
29	2A	IWB28816	1.8836		2	2	1	2	2	1	2	1	1	1	2	2	1	2	1	1	1	1	2	2	2	1	2	2	2	2	1	2	2	2	2	2	2	1	2	1	2	1	1	2	1	2	1	2	2
30	2A	IWB59733	3.07997		2	2	1	2	2	1	2	1	1	1	2	2	1	2	1	1	1	1	2	2	2	1	2	2	2	2	1	2	2	2	2	2	2	1	2	1	2	1	1	2	1	2	1	2	2
31	2A	IWB19743	3.07997		2	2	1	2	2	1	2	1	1	1	2	2	1	2	1	1	1	1	2	2	2	1	2	2	2	2	1	2	2	2	2	2	2	1	2	1	2	1	1	2	1	2	1	2	2
32	2A	IWB81007	3.07997		2	2	1	2	2	1	2	1	1	1	2	2	1	2	1	1	1	1	2	2	2	1	2	2	2	2	1	2	2	2	2	3	2	1	2	1	2	1	1	2	1	2	1	2	2
33	2A	IWB74468	3.07997		2	2	1	2	2	1	2	1	1	1	2	2	1	2	1	1	1	1	2	2	2	1	2	2	2	2	1	2	2	2	2	3	2	1	2	1	2	1	1	2	1	2	1	2	2
34	2A	IWB77814	3.31694		2	2	2	2	2	1	2	1	1	1	2	2	1	2	1	1	1	1	2	2	2	1	2	2	2	2	1	2	2	2	2	3	2	1	2	1	2	1	1	2	1	2	1	2	2
35	2A	IWB58709	3.31694		2	2	2	2	2	1	2	1	1	1	2	2	1	2	1	1	1	1	2	2	2	1	2	2	2	2	1	2	2	2	2	3	2	1	2	1	2	1	1	2	1	2	1	2	2
36	2A	IWB52199	3.31694		2	2	2	2	2	1	2	1	1	1	2	2	1	2	1	1	1	1	2	2	2	1	2	2	2	2	1	2	2	2	2	3	2	1	2	1	2	1	1	2	1	2	1	2	2
37	2A	IWB77813	3.31694		2	2	2	2	2	1	2	1	1	1	2	2	1	2	1	1	1	1	2	2	2	1	2	2	2	2	1	2	2	2	2	3	2	1	2	1	2	1	1	2	1	2	1	2	2
38	2A	IWB77751	3.54949		2	2	2	2	2	1	2	1	1	1	2	2	1	2	1	1	1	1	2	2	2	1	2	2	2	2	1	2	2	2	2	3	2	1	2	1	2	1	2	2	1	2	1	2	2
39	2A	IWB22184	3.54949		2	2	2	2	2	1	2	1	1	1	2	2	1	2	1	1	1	1	2	2	2	1	2	2	2	2	1	2	2	2	2	3	2	1	2	1	2	1	2	2	1	2	1	2	2
40	2A	IWB45009	3.54949		2	2	2	2	2	1	2	1	1	1	2	2	1	2	1	1	1	1	2	2	2	1	2	2	2	2	1	2	2	2	2	3	2	1	2	1	2	1	2	2	1	2	1	2	2
41	2A	IWB34351	3.54949		2	2	2	2	2	1	2	1	1	1	2	2	1	2	1	1	1	1	2	2	2	1	2	2	2	2	1	2	2	2	2	3	2	1	2	1	2	1	2	2	1	2	1	2	2
42	2A	IWB57879	3.54949		2	2	2	2	2	1	2	1	1	1	2	2	1	2	1	1	1	1	2	2	2	1	2	2	2	2	1	2	2	2	2	3	2	1	2	1	2	1	2	2	1	2	1	2	2
43	2A	IWB49411	3.54949		2	2	2	2	2	1	2	1	1	1	2	2	1	2	1	1	1	1	2	2	2	1	2	2	2	2	1	2	2	2	2	3	2	1	2	1	2	1	2	2	1	2	1	2	2
44	2A	IWB22183	3.54949		2	2	2	2	2	1	2	1	1	1	2	2	1	2	1	1	1	1	2	2	2	1	2	2	2	2	1	2	2	2	2	3	2	1	2	1	2	1	2	2	1	2	1	2	2
45	2A	IWB1831	4.01898		2	2	2	2	2	1	2	1	1	1	2	2	1	2	1	1	1	1	2	2	2	1	2	2	2	2	1	2	2	2	1	3	2	1	2	1	2	1	2	2	1	2	1	2	2
46	2A	IWB16988	4.01898		2	2	2	2	2	1	2	1	1	1	2	2	1	2	1	1	1	1	2	2	2	1	2	2	2	2	1	2	2	2	1	3	2	1	2	1	2	3	2	2	1	2	3	2	2
47	2A	IWB26006	4.25372		2	2	2	2	2	1	2	1	1	1	2	2	1	2	1	1	1	1	2	2	2	1	2	2	2	2	1	2	2	2	1	1	2	1	2	1	2	1	2	2	1	2	1	2	2
48	2A	IWB12629	4.25372		2	2	2	2	2	1	2	1	1	1	2	2	1	2	1	1	1	1	2	2	2	1	2	2	2	2	1	2	2	2	1	3	2	1	2	1	2	1	2	2	1	2	1	2	2
49	2A	IWB81265	4.25372		2	2	2	2	2	1	2	1	1	1	2	2	1	2	1	1	1	1	2	2	2	1	2	2	2	2	1	2	2	2	1	3	2	1	2	1	2	1	2	2	1	2	1	2	2
50	2A	IWB31559	4.25372		2	2	2	2	2	1	2	1	1	1	2	2	1	2	1	1	1	1	2	2	2	1	2	2	2	2	1	2	2	2	1	3	2	1	2	1	2	1	2	2	1	2	1	2	2
51	2A	IWB65490	4.25372		2	2	2	2	2	1	2	1	1	1	2	2	1	2	1	1	1	1	2	2	2	1	2	2	2	2	1	2	2	2	1	1	2	1	2	1	2	1	2	2	1	2	1	2	2
52	2A	IWB23829	4.25372		2	2	2	2	2	1	2	1	1	1	2	2	1	2	1	1	1	1	2	2	2	1	2	2	2	2	1	2	2	2	1	3	2	1	2	1	2	1	2	2	1	2	1	2	2
53	2A	IWB15798	4.25372		2	2	2	2	2	1	2	1	1	1	2	2	1	2	1	1	1	1	2	2	2	1	2	2	2	2	1	2	2	2	1	2	2	1	2	1	2	1	2	2	1	2	1	2	2
54	2A	IWB23830	4.25372		2	2	2	2	2	1	2	1	1	1	2	2	1	2	1	1	1	1	2	2	2	1	2	2	2	2	1	2	2	2	1	2	2	1	2	1	2	1	2	2	1	2	1	2	2
55	2A	IWB10588	4.25372		2	2	2	2	2	1	2	1	1	1	2	2	1	2	1	1	1	1	2	2	2	1	2	2	2	2	1	2	2	2	1	3	2	1	2	1	2	1	2	2	1	2	1	2	2
56	2A	IWB65489	4.25372		2	2	2	2	2	1	2	1	1	1	2	2	1	2	1	1	1	1	2	2	2	1	2	2	2	2	1	2	2	2	1	3	2	1	2	1	2	1	2	2	1	2	1	2	2
57	2A	IWB59316	4.25372		2	2	2	2	2	1	2	1	1	1	2	2	1	2	1	1	1	1	2	2	2	1	2	2	2	2	1	2	2	2	1	3	2	1	2	1	2	1	2	2	1	2	1	2	2
58	2A	IWB43851	4.48519		2	2	2	2	2	1	2	1	1	1	2	2	1	2	1	1	1	1	2	2	2	1	2	2	2	2	1	2	2	2	1	3	2	1	2	1	2	1	2	2	1	2	1	2	2
59	2A	IWB65061	4.48519		2	2	2	2	2	1	2	1	1	1	2	2	1	2	1	1	1	1	2	2	2	1	2	2	2	2	1	2	2	2	1	3	2	1	2	1	2	1	2	2	1	2	1	2	2
60	2A	IWB66734	4.48519		2	2	2	2	2	1	2	1	1	1	2	2	1	2	1	1	1	1	2	2	2	1	2	2	2	2	1	2	2	2	1	3	2	1	2	1	2	1	2	2	1	2	1	2	2
61	2A	IWB18862	4.48519		2	2	2	2	2	1	2	1	1	1	2	2	1	2	1	1	1	1	2	2	2	1	2	2	2	2	1	2	2	2	1	2	2	1	2	1	2	1	2	2	1	2	1	2	2
62	2A	IWB66733	4.48519		2	2	2	2	2	1	2	1	1	1	2	2	1	2	1	1	1	1	2	2	2	1	2	2	2	2	1	2	2	2	1	3	2	1	2	1	2	1	2	2	1	2	1	2	2
63	2A	IWB35651	4.48519		2	2	2	2	2	1	2	1	1	1	2	2	1	2	1	1	1	1	2	2	2	1	2	2	2	2	1	2	2	2	1	2	2	1	2	1	2	1	2	2	1	2	1	2	2
64	2A	IWB6542	4.48519		2	2	2	2	2	1	2	1	1	1	2	2	1	2	1	1	1	1	2	2	2	1	2	2	2	2	1	2	3	2	1	2	2	1	2	1	2	1	2	2	1	2	1	2	2
65	2A	IWB68360	4.48519		2	2	2	2	2	1	2	1	1	1	2	2	1	2	1	1	1	1	2	2	2	1	2	2	2	2	1	2	2	2	1	3	2	1	2	1	2	1	2	2	1	2	1	2	2
66	2A	IWB65059	4.48519		2	2	2	2	2	1	2	1	1	1	2	2	1	2	1	1	1	1	2	2	2	1	2	2	2	2	1	2	2	2	1	1	2	1	2	1	2	1	2	2	1	2	1	2	2
67	2A	IWB35430	4.48519		2	2	2	2	2	1	2	1	1	1	2	2	1	2	1	1	1	1	2	2	2	1	2	2	2	2	1	2	2	2	1	3	2	1	2	1	2	1	2	2	1	2	1	2	2
68	2A	IWB68361	4.48519		2	2	2	2	2	1	2	3	1	1	2	2	1	2	1	1	1	1	2	2	2	1	2	2	2	2	1	2	2	2	1	3	2	1	2	1	2	1	2	2	1	2	1	2	2
69	2A	IWB66738	4.48519		2	2	2	2	2	1	2	1	1	1	2	2	1	2	1	1	1	1	2	2	2	1	2	2	2	2	1	2	2	2	1	3	2	1	2	1	2	1	2	2	1	2	1	2	2
70	2A	IWB17420	4.48519		2	2	2	2	2	1	2	1	1	1	2	2	1	2	1	1	1	1	2	2	2	1	2	2	2	2	1	2	2	2	1	3	2	1	2	1	2	1	2	2	1	2	1	2	2
71	2A	IWB10983	4.48519		2	2	2	2	2	1	2	1	1	1	2	2	1	2	1	1	1	1	2	2	2	1	2	2	2	2	1	2	2	2	1	3	2	1	2	1	2	1	2	2	1	2	1	2	2
72	2A	IWB32223	4.48519		2	2	2	2	2	1	2	1	1	1	2	2	1	2	1	3	1	1	2	2	2	1	2	2	2	2	3	2	2	2	1	3	2	1	2	1	2	1	2	2	1	2	1	2	2
73	2A	IWB11669	4.48519		2	2	2	2	2	1	2	1	1	1	2	2	1	2	1	1	1	1	2	2	2	1	2	2	2	2	1	2	2	2	1	3	2	1	2	1	2	1	2	2	1	2	1	2	2
74	2A	IWB73151	5.42425		2	2	2	2	2	1	2	1	1	1	2	2	1	2	1	1	1	1	2	3	2	1	2	2	2	2	1	2	2	2	1	3	2	1	2	1	2	1	2	2	1	2	1	2	2
75	2A	IWB73231	5.42425		2	2	2	2	2	1	2	1	1	1	2	2	1	2	1	1	1	1	2	3	2	1	2	2	2	2	1	2	2	2	1	3	2	1	2	1	2	1	2	2	1	2	1	2	2
76	2A	IWB72938	5.42425		2	2	2	2	2	1	2	1	1	1	2	2	1	2	1	1	1	1	2	3	2	1	2	2	2	2	1	2	2	2	1	3	2	1	2	1	2	1	2	2	1	2	1	2	2
77	2A	IWB5945	5.42425		2	2	2	2	2	1	2	1	1	1	2	2	1	2	1	1	1	1	2	3	2	1	2	2	2	2	1	2	2	2	1	3	2	1	2	1	2	1	2	2	1	2	1	2	2
78	2A	IWB73421	5.42425		2	2	2	2	2	1	2	1	1	1	2	2	1	2	1	1	1	1	2	3	2	1	2	2	2	2	1	2	2	2	1	3	2	1	2	1	2	1	2	2	1	2	1	2	2
79	2A	IWB73487	5.42425		2	2	2	2	2	1	2	1	1	1	2	2	1	2	1	1	1	1	2	3	2	1	2	2	2	2	1	2	2	2	1	3	2	1	2	1	2	1	2	2	1	2	1	2	2
80	2A	IWB14009	8.64645		2	2	2	1	2	1	2	1	1	1	2	2	1	2	1	1	1	1	2	1	2	1	2	2	2	2	1	2	2	1	1	1	2	1	2	1	2	1	2	2	1	2	1	2	2
81	2A	IWB68412	10.5612		2	2	2	1	2	1	2	1	1	1	2	2	1	2	1	1	1	1	2	1	2	1	2	2	2	2	1	2	2	1	1	3	2	1	1	1	2	1	2	2	1	2	1	2	2
82	2A	IWB40677	12.2364		2	2	2	1	2	1	2	1	1	1	2	2	2	2	1	1	1	1	2	1	2	1	2	2	2	2	1	2	2	1	1	3	2	1	1	1	2	1	2	1	1	2	1	2	2
83	2A	IWB10026	13.4215		2	2	2	1	2	1	2	1	1	1	2	1	2	2	1	1	1	1	2	1	2	1	2	2	2	2	1	2	2	1	1	3	2	1	1	1	2	1	2	1	1	2	1	1	2
84	2A	IWB53778	13.4215		2	2	2	1	2	1	2	1	1	1	2	1	2	2	1	1	1	1	2	1	2	1	2	2	2	2	1	2	2	1	1	1	2	3	1	1	2	1	2	1	1	2	1	1	2
85	2A	IWB28750	13.4215		2	2	2	1	2	1	2	1	1	1	2	1	2	2	1	1	1	1	2	1	2	1	2	2	2	2	1	2	2	1	1	3	2	1	1	1	2	1	2	1	1	2	1	1	2
86	2A	IWB63272	13.654		2	2	2	1	2	1	2	1	1	1	2	1	2	2	1	1	1	1	2	1	2	1	2	2	2	2	1	2	2	1	1	3	2	1	1	1	2	1	2	1	1	2	1	1	2
87	2A	IWB81518	13.654		2	2	2	1	2	1	2	1	1	1	2	1	2	2	1	1	1	1	2	1	2	1	2	2	2	2	1	2	2	1	1	3	2	1	1	1	2	1	2	1	1	2	1	1	2
88	2A	IWB45896	15.3293		2	2	2	1	2	1	2	1	1	1	1	1	2	2	1	1	1	1	2	1	2	1	2	1	2	2	1	2	2	1	1	3	2	1	1	1	2	1	2	1	1	2	1	1	2
89	2A	IWB46729	16.7719		2	2	2	1	2	1	2	1	1	1	1	1	2	2	1	1	1	1	2	1	2	1	2	1	2	2	1	2	2	1	1	1	1	1	1	1	2	1	2	1	1	2	1	1	2
90	2A	IWB41233	17.4829		2	2	2	1	2	1	2	1	1	1	1	1	2	2	1	1	1	1	2	1	2	1	2	1	2	2	1	2	2	1	1	3	1	1	1	1	2	1	2	1	1	2	1	1	2
91	2A	IWB25031	17.4829		2	2	2	1	2	1	2	1	1	1	1	1	2	2	1	1	1	1	2	1	2	1	2	1	2	2	1	2	2	1	1	2	1	1	1	1	2	1	2	1	1	2	1	1	2
92	2A	IWB26617	17.4829		2	2	2	1	2	1	2	1	1	1	1	1	2	2	1	1	1	1	2	1	2	1	2	1	2	2	1	2	2	1	1	3	1	1	1	1	2	1	2	1	1	2	1	1	2
93	2A	IWB12622	17.4829		2	2	2	1	2	1	2	1	1	1	1	1	2	2	1	1	1	1	2	1	2	1	2	1	2	2	1	2	2	1	1	3	1	1	1	1	2	1	2	1	1	2	1	1	2
94	2A	IWB11847	17.4829		2	2	2	1	2	1	2	1	1	1	1	1	2	2	1	1	1	1	2	1	2	1	2	1	2	2	1	2	2	1	1	3	1	1	1	1	2	1	2	1	1	2	1	1	2
95	2A	IWB18107	17.4829		2	2	2	1	2	1	2	1	1	1	1	1	2	2	1	1	1	1	2	1	2	1	2	1	2	2	1	2	2	1	1	3	1	1	1	1	2	1	2	1	1	2	1	1	2
96	2A	IWB9605	17.4829		2	2	2	1	2	1	2	1	1	1	1	1	2	2	1	1	1	1	2	1	2	1	2	3	2	2	1	2	2	1	1	3	1	1	1	1	2	1	2	1	1	2	1	1	2
97	2A	IWB1365	24.0303		2	2	2	1	2	1	2	1	2	1	1	1	2	2	2	2	1	1	2	1	2	2	2	2	2	2	1	2	2	1	1	2	1	1	1	1	2	1	2	1	1	2	1	1	2
98	2A	IWB10238	25.1987		2	2	2	1	2	1	2	1	1	1	1	1	2	2	2	2	1	1	2	1	2	2	2	2	2	2	1	2	2	1	1	2	1	1	1	1	2	1	2	1	1	2	1	1	2
99	2A	IWB47995	25.8996		2	2	2	1	2	1	2	1	1	1	1	1	2	2	2	2	1	1	2	1	2	2	2	2	2	2	1	2	2	1	1	2	1	1	1	1	2	1	2	1	1	2	1	1	2
100	2A	IWB1280	25.8996		2	2	2	1	2	1	2	1	1	1	1	1	2	2	2	2	1	1	2	1	2	2	2	2	2	2	1	2	2	1	1	3	1	1	1	1	2	1	2	1	1	2	1	1	2
101	2A	IWB43373	25.8996		2	2	2	1	2	1	2	1	1	1	1	1	2	2	2	2	1	1	2	1	2	2	2	2	2	2	1	2	2	1	1	2	1	1	1	1	2	1	2	1	1	2	1	1	2
102	2A	IWB26493	27.8053		2	2	2	1	2	1	2	1	1	1	1	1	2	2	2	2	1	1	2	1	2	2	2	2	2	2	2	2	2	1	1	2	2	1	1	2	2	1	2	1	1	2	1	1	2
103	2A	IWB38844	32.0655		2	2	2	1	2	1	2	1	1	1	1	1	1	2	2	2	1	1	2	1	2	2	2	2	2	1	2	1	2	1	1	2	2	1	1	2	2	1	2	1	1	2	1	1	2
104	2A	IWB77113	38.6129		2	2	1	1	2	2	2	1	1	1	1	1	1	2	2	2	1	1	2	1	1	2	2	2	2	1	2	1	2	1	1	1	2	1	1	2	2	1	2	1	1	2	1	1	2
105	2A	IWB34575	38.6129		2	2	1	1	2	2	2	1	1	1	1	1	1	2	2	2	1	1	2	1	1	2	2	2	2	1	2	1	2	1	1	1	2	1	1	2	2	1	2	1	1	2	1	1	2
106	2A	IWB17732	38.6129		2	2	1	1	2	2	2	1	1	1	1	1	1	2	2	2	1	1	2	1	1	2	2	2	2	1	2	1	2	1	1	1	2	1	1	2	2	1	2	1	1	2	1	1	2
107	2A	IWB54033	38.851		2	2	1	1	2	2	2	1	1	1	1	1	1	2	2	2	1	1	2	1	1	2	2	2	2	1	2	1	2	1	1	1	2	1	1	2	2	1	2	1	1	2	1	1	1
108	2A	IWB43887	38.851		2	2	1	1	2	2	2	1	1	1	1	1	1	2	2	2	1	1	2	1	1	2	2	2	2	1	2	1	2	1	1	1	2	1	1	2	2	1	2	1	1	2	1	1	1
109	2A	IWB2412	40.0531		2	2	1	1	2	2	2	1	1	1	1	1	1	2	2	2	1	1	2	1	1	2	2	2	2	1	2	1	2	1	1	3	2	1	1	2	2	1	2	1	1	2	1	1	1
110	2A	IWB70098	40.0531		2	2	1	1	2	2	2	1	1	1	1	1	1	2	2	2	1	1	2	1	1	2	2	2	2	1	2	1	2	1	1	1	2	1	1	2	2	1	2	1	1	2	1	1	1
111	2A	IWB70375	41.7124		2	2	1	1	2	2	2	1	1	1	1	1	1	2	2	2	1	1	2	1	1	2	2	2	1	1	2	1	2	1	1	1	2	1	1	2	2	1	2	1	1	2	1	1	1
112	2A	IWB40060	41.9461		2	2	1	1	2	2	2	1	1	1	1	1	1	2	2	2	1	1	2	1	1	2	2	2	1	1	2	1	2	1	1	3	2	1	1	2	2	1	2	1	1	2	1	1	1
113	2A	IWB67790	43.87		2	2	1	1	2	2	2	1	1	1	1	1	1	2	2	2	1	1	1	1	1	2	2	2	1	1	2	1	2	1	1	1	2	1	1	2	2	1	2	1	1	2	1	1	1
114	2A	IWB67791	43.87		2	2	1	1	2	2	2	1	1	1	1	1	1	2	2	2	1	1	1	1	1	2	2	2	1	1	2	1	2	1	1	1	2	1	1	2	2	1	2	1	1	2	1	1	1
115	2A	IWB72462	44.0994		2	2	1	1	2	2	2	1	1	1	1	1	1	2	2	2	1	1	1	1	1	2	2	2	1	1	2	1	2	1	1	1	2	1	1	2	2	1	2	1	1	2	1	1	1
116	2A	IWB72463	44.0994		2	2	1	1	2	2	2	1	1	1	1	1	1	2	2	2	1	1	1	1	1	2	2	2	1	1	2	1	2	1	1	1	2	1	1	2	2	1	2	1	1	2	1	1	1
117	2A	IWB17323	44.0994		2	2	1	1	2	2	2	1	1	1	1	1	1	2	2	2	1	1	1	1	1	2	2	2	1	1	2	1	2	1	1	1	2	1	1	2	2	1	2	1	1	2	1	1	1
118	2A	IWB41735	44.0994		2	2	1	1	2	2	2	1	1	1	1	1	1	2	2	2	1	1	1	1	1	2	2	2	1	1	2	1	2	1	1	1	2	1	1	2	2	1	2	1	1	2	1	1	1
119	2A	IWB8574	44.0994		2	2	1	1	2	2	2	1	1	1	1	1	1	2	2	2	1	1	1	1	1	3	2	2	1	1	2	1	3	1	1	1	2	1	1	2	2	1	2	1	1	2	1	1	1
120	2A	IWB10811	44.0994		2	2	1	1	2	2	2	1	1	1	1	1	1	2	2	2	1	1	1	1	1	2	2	2	1	1	2	1	2	1	1	1	2	1	1	2	2	1	2	1	1	2	1	1	1
121	2A	IWB9401	45.5148		2	2	1	1	2	2	2	1	1	1	1	1	1	2	2	2	2	1	1	1	1	2	2	2	1	1	2	1	2	1	1	1	2	1	1	2	2	1	2	1	1	1	1	1	2
122	2A	IWB71719	45.5148		2	2	1	1	2	2	2	1	1	1	1	1	1	2	2	2	2	1	1	1	1	2	2	2	1	1	2	1	2	1	1	1	2	1	1	2	2	1	2	1	1	1	1	1	2
123	2A	IWB34593	45.5148		2	2	1	1	2	2	2	1	1	1	1	1	1	2	2	2	2	1	1	1	1	2	2	2	1	1	2	1	2	1	1	1	2	1	1	2	2	1	2	1	1	1	1	1	2
124	2A	IWB77856	47.6692		2	2	2	1	2	2	2	1	2	1	1	1	1	2	2	2	2	1	2	2	1	2	2	2	1	1	2	1	2	1	1	1	2	1	1	2	2	1	2	1	1	1	1	1	2
125	2A	IWB11734	47.6692		2	2	2	1	2	2	2	1	2	1	1	1	1	2	2	2	2	1	2	2	1	2	2	2	1	1	2	1	2	1	1	1	2	1	1	2	2	1	2	1	1	1	1	1	2
126	2A	IWB78529	47.6692		2	2	2	1	2	2	2	1	2	1	1	1	1	2	2	2	2	1	2	2	1	2	2	2	1	1	2	1	2	1	1	1	2	1	1	2	2	1	2	1	1	1	1	1	2
127	2A	IWB43157	47.6692		2	2	2	1	2	2	2	1	2	1	1	1	1	2	2	2	2	1	2	2	1	2	2	2	1	1	2	1	2	1	1	1	2	1	1	2	2	1	2	1	1	1	1	1	2
128	2A	IWB72863	47.6692		2	2	2	1	2	2	2	1	2	1	1	1	1	2	2	2	2	1	2	2	1	2	2	2	1	1	2	1	2	1	1	1	2	1	1	2	2	1	2	1	1	1	1	1	2
129	2A	IWB72862	47.6692		2	2	2	1	2	2	2	3	2	1	1	1	1	2	2	2	2	1	2	2	1	2	2	2	1	1	2	1	2	1	1	1	2	1	1	2	2	1	2	3	1	1	1	1	2
130	2A	IWB72864	47.6692		2	2	2	1	2	2	2	1	2	1	1	1	1	2	2	2	2	1	2	2	1	2	2	2	1	1	2	1	2	1	1	3	2	1	1	2	2	1	2	1	1	1	1	1	2
131	2A	IWB28073	47.904		2	2	2	1	2	2	2	1	2	1	1	1	1	2	2	2	2	1	2	2	1	2	2	2	1	1	2	1	2	1	1	3	2	1	1	2	2	1	2	1	1	1	1	1	2
132	2A	IWB6858	47.904		2	2	2	1	2	2	2	1	2	1	1	1	1	2	2	2	2	1	2	2	1	2	2	2	1	1	2	1	2	1	1	1	2	1	1	2	2	1	2	1	1	1	1	1	2
133	2A	IWB17776	52.4389	**	2	2	2	1	2	2	2	1	2	1	1	1	2	2	2	2	2	2	2	2	1	2	1	2	1	1	2	1	2	1	1	1	2	1	1	2	2	1	2	1	2	1	1	2	2
134	2A	IWB73038	55.927	**	2	2	2	1	2	2	2	1	2	1	1	1	2	2	2	1	2	2	2	2	1	2	1	2	1	1	2	2	2	1	1	3	2	1	1	2	2	1	2	1	2	1	1	2	1
135	2A	IWB51951	56.1596	**	2	2	2	1	2	2	2	1	2	1	1	1	2	2	2	1	2	2	2	2	1	2	1	2	1	1	2	2	2	1	1	3	2	1	1	2	2	1	2	1	2	1	1	2	1
136	2A	IWB77260	56.8638	**	2	2	2	1	2	2	2	1	2	1	1	2	2	2	2	1	2	2	2	2	1	2	1	2	1	1	2	2	2	1	1	1	2	1	1	2	2	1	2	1	2	1	1	2	1
137	2A	IWB11289	56.8638	**	2	2	2	1	2	2	2	1	2	1	1	2	2	2	2	1	2	2	2	2	1	2	1	2	1	1	2	2	2	1	1	1	2	1	1	2	2	1	2	1	2	1	1	2	1
138	2A	IWB76764	56.8638	**	2	2	2	1	2	2	2	1	2	1	1	2	2	2	2	1	2	2	2	2	1	2	1	2	1	1	2	2	2	1	1	1	2	1	1	2	2	1	2	1	2	1	1	2	1
139	2A	IWB77259	56.8638	**	2	2	2	1	2	2	2	1	2	1	1	2	2	2	2	1	2	2	2	2	1	2	1	2	1	1	2	2	2	1	1	1	2	1	1	2	2	1	2	1	2	1	1	2	1
140	2A	IWB81474	56.8638	**	2	2	2	1	2	2	2	1	2	1	1	2	2	2	2	1	2	2	2	2	1	2	1	2	1	1	2	2	2	1	1	1	2	1	1	2	2	1	2	1	2	1	1	2	1
141	2A	IWB12494	56.8638	**	2	2	2	1	2	2	2	1	2	1	1	2	2	2	2	1	2	2	2	2	1	2	1	2	1	1	2	2	2	1	1	1	2	1	1	2	2	1	2	3	2	1	1	2	1
142	2A	IWB54584	56.8638	**	2	2	2	1	2	2	2	1	2	1	1	2	2	2	2	1	2	2	2	2	1	2	1	2	1	1	2	2	2	1	1	1	2	1	1	2	2	1	2	3	2	1	1	2	1
143	2A	IWB29899	56.8638	***	2	2	2	1	2	2	2	1	2	1	1	2	2	2	2	1	2	2	2	2	1	2	1	2	1	1	2	2	2	1	1	3	2	1	1	2	2	1	2	2	2	1	1	2	1
144	2A	IWB53505	56.8638	**	2	2	2	1	2	2	2	1	2	1	1	2	2	2	2	1	2	2	2	2	1	2	1	2	1	1	2	2	2	1	1	1	2	1	1	2	2	1	2	2	2	1	1	2	1
145	2A	IWB59949	57.0942	***	2	2	2	1	2	2	2	1	2	1	1	2	2	2	2	1	2	2	2	2	1	2	1	2	1	1	2	2	2	1	1	1	2	1	1	2	2	1	2	2	2	1	1	2	1
146	2A	IWB73849	60.3325	*	2	2	2	1	2	2	2	1	2	1	1	2	2	2	2	1	1	1	2	2	1	2	1	1	1	1	2	2	1	1	1	3	2	1	1	2	2	1	2	2	2	1	1	1	1
147	2A	IWB61437	64.68	**	2	2	2	1	2	2	2	1	2	1	1	2	2	2	1	2	1	1	2	2	1	2	2	1	2	1	2	2	1	2	1	1	2	1	1	2	2	1	2	1	2	1	1	1	1
148	2A	IWB36058	64.68	**	2	2	2	1	2	2	2	1	2	1	1	2	2	2	1	2	1	1	2	2	1	2	2	1	2	1	2	2	1	2	1	1	2	1	1	2	2	1	2	1	2	1	1	1	1
149	2A	IWB36470	64.68	**	2	2	2	1	2	2	2	1	2	1	1	2	2	2	1	2	1	1	2	2	1	2	2	1	2	1	2	2	1	2	1	1	2	1	1	2	2	1	2	1	2	1	1	1	1
150	2A	IWB79031	64.68	**	2	2	2	1	2	2	2	1	2	1	1	2	2	2	1	2	1	1	2	2	1	2	2	1	2	1	2	2	1	2	1	1	2	1	1	2	2	1	2	1	2	1	1	1	1
151	2A	IWB39657	64.68	**	2	2	2	1	2	2	2	1	2	1	1	2	2	2	1	2	1	1	2	2	1	2	2	1	2	1	2	2	1	2	1	1	2	1	1	2	2	1	2	1	2	1	1	1	1
152	2A	IWB38011	64.9126	**	2	2	2	1	2	2	2	1	2	1	1	2	2	2	1	2	1	1	2	2	1	2	2	1	2	1	2	2	1	2	1	1	2	1	1	2	2	1	2	1	2	1	1	1	1
153	2A	IWB8937	66.0976	***	2	2	2	1	2	2	2	1	2	1	1	1	2	2	2	2	1	2	2	2	1	2	2	1	2	1	2	2	1	2	1	1	2	1	1	2	2	1	2	1	2	1	1	1	1
[truncated: 8,487 more rows]
[truncated: 174 more columns]
